# Supplementary material for: The EGFR-HSF1 axis accelerates the tumorigenesis of pancreatic cancer
Source: J Exp Clin Cancer Res. 2021 Jan 9;40:25. doi: 10.1186/s13046-020-01823-4 (PMC7797143; doi:10.1186/s13046-020-01823-4)
Supplement: Supplementary file 2 — Additional file 2: Table S1. Source files of bioinformatics analysis on HSF1 and its related proteins (mainly TCGA PAAD datasets). [file 13046_2020_1823_MOESM2_ESM.xlsx]

## Sheet: DAVID-GO-CC
Term	Count	1	2	3	PValue	4	5	6	Genes
Plasma membrane	78	3479	13.7809	0.761816	0.997767	1	1	1	SHARPIN; SLC52A2; SCRIB; ADRM1; DVL1; PLEC; PKP3; SLC39A4; RHOD; ATP6V0C; EPN1; ARFRP1; HPCAL1; CD151; BCAR1; SMPD4; TMEM8A; AXIN1; SLC16A3; CLTB; TIMM17B; HRAS; RIN1; HSPB1; NCLN; STXBP2; JUP; SLC19A1; LTBR; ZNRF1; RTN4R; ST14; ARPC1B; CAPN1; SYTL1; RAB11B; AP2A1; FGFRL1; LSR; POR; ZMYND19; TRAF2; PRSS8; RRAS; TRIP6; GNA15; ITGB4; GJB3; KCNN4; CIB1; BSG; EMD; TRIP10; SPINT2; PTOV1; STX4; BAIAP2;…
Nucleus	255	5847	45.053	1.48176	6.97215e-14	5.46617e-11	2.73308e-11	1.45229e-10	HSF1; ZC3H3; ADRM1; MAF1; RECQL4; SLC2A4RG; LSM4; FAM83H; ZFPL1; FBXL6; EXOSC4; PUF60; MRGBP; RALY; SNRPA; PLEC; RAD23A; PKP3; SCAF1; ZNF707; CPSF1; H2AFX; CDT1; PRICKLE3; ALDOA; ZNF598; CORO1B; GNB2; NELFB; RANGAP1; SART1; NUTF2; NDUFS8; POLR2H; RPS6KA4; ZGPAT; HMGA1; NR2F6; EPN1; OGFR; RUVBL2; EIF6; SLC35C2; ZNF787; MPG; MED15; GLI4; PPP4C; PGLS; ZNF579; PPP1CA; ZNF205; EEF1D; UCKL1; MRPL52; PP…
Integral to membrane	29	1702	5.12367	0.579083	0.999747	1	1	1	MFSD10; TMUB1; LRFN4; GRINA; ZDHHC12; CYHR1; ATP6V0C; SLC35C2; TPRA1; FAM189B; MFSD3; TMEM44; TIMM17B; UNC93B1; MANBAL; TOMM34; TMEM259; ITGB4; AGTRAP; KDELR1; SPINT2; KRTCAP2; CLPTM1L; MBOAT7; DRD4; MLST8; MTX1; SERINC2; PIEZO1;
Integral to plasma membrane	15	934	2.65018	0.54599	0.997326	1	1	1	SLC52A2; ADRM1; RCE1; CD151; TMEM8A; BCAP31; SLC16A3; SLC19A1; EBP; ST14; GPC1; DRD4; EFNA4; LY6E; TACSTD2;
Golgi aparatus	26	897	4.59364	0.985141	0.5613	1	1	1	ZFPL1; PKMYT1; ATP6V0C; MED15; RAB1B; SCYL1; SMPD4; PAK4; BCAP31; ARFGAP1; CLTB; HRAS; ZNRF1; RAB11B; FGFRL1; LSR; YIF1A; STX10; YIPF2; KDELR1; STK25; ERGIC3; LMAN2; SLC4A2; ARF5; PITPNM1;
Cytoplasm	230	5684	40.636	1.37482	7.68814e-09	6.0275e-06	2.00917e-06	1.06762e-05	HSF1; SHARPIN; SCRIB; TONSL; ADRM1; MAF1; SLC2A4RG; DVL1; LSM4; VPS28; FBXL6; EXOSC4; PPP1R14B; RALY; PLEC; CHMP4B; MIF; SCAF1; HGS; GIPC1; GUK1; CDT1; ALDOA; CORO1B; GNB2; NELFB; RANGAP1; APRT; SART1; NUTF2; POLR2H; ZGPAT; HMGA1; EPN1; OGFR; RUVBL2; GPAA1; EIF6; MPG; MED15; PPP4C; PGLS; PPP1CA; EEF1D; HPCAL1; UCKL1; PPP1R13L; OPLAH; GTF2IRD1; INO80B; COMMD5; PDAP1; OTUB1; BAD; DAZAP1; PHLDA2; NO…
Perinuclear region of cytoplasm	5	119	0.883392	1.43024	0.273293	1	1	1	GNB2; INF2; XRCC3; TAF10; TPD52L2;
Actin cytoskeleton	4	132	0.706714	1.03203	0.547041	1	1	1	ALDOA; ARPC1A; ARPC1B; MVB12A;
Ribonucleoprotein complex	2	65	0.353357	1.05044	0.57426	1	1	1	BOP1; MRPL41;
Heterogeneous nuclear ribonucleoprotein complex	2	17	0.353357	4.01465	0.0879202	1	1	1	RALY; PTBP1;
Exosomes	102	2043	18.0212	1.6964	5.61944e-08	4.40564e-05	8.81128e-06	4.6821e-05	SCRIB; VPS28; PLEC; CHMP4B; MIF; RPL8; PKP3; HGS; GIPC1; CHMP1A; ALDOA; CORO1B; GNB2; APRT; NUTF2; ATP6V0C; RUVBL2; EIF6; ARRDC1; PGLS; PPP1CA; EEF1D; HPCAL1; TSPO; OTUB1; RAB1B; NT5C; LYPLA2; EPS8L2; NAPRT; AUP1; EIF3B; COMT; ARPC1A; SLC25A1; CDC37; HRAS; PTBP1; HSPB1; STXBP2; JUP; TSTA3; TALDO1; RPL28; BCL2L12; ARHGDIA; MVP; HIST2H2AA3; ARPC1B; CAPN1; RAB11B; AP2A1; TUBA4A; HIST3H2A; LSR; ARPC5…
Mitochondrion	97	1259	17.1378	2.61784	1.25114e-18	9.80897e-16	9.80897e-16	5.21225e-15	RALY; PAM16; PLEC; RPL8; GUK1; ALDOA; MACROD1; NDUFS8; GPAA1; ROMO1; TOP1MT; PPP1CA; CYC1; EEF1D; MRPL52; TSPO; BAD; TRIM28; FPGS; RAB1B; SLC25A39; SMPD4; MRPS34; NTHL1; BCAP31; MRPL41; ACAD9; TBRG4; IRAK1; SLC25A22; MRPL12; SLC25A1; DGUOK; SPNS1; TIMM17B; HRAS; H1FX; PTGES2; MRPL28; GADD45GIP1; NOL3; BBC3; TOMM34; MRPL23; AP2A1; MRPS12; GTPBP3; BCKDK; ABHD11; POR; XRCC3; SIVA1; MRPL55; NDUFV1; T…
Lysosome	86	1620	15.1943	1.80379	5.36653e-08	4.20736e-05	8.81128e-06	4.6821e-05	SLC52A2; VPS28; PLEC; CHMP4B; GIPC1; CHMP1A; RHOD; GNB2; APRT; ATP6V0C; EPN1; GPAA1; PGLS; CYC1; HPCAL1; TPRA1; OTUB1; RAB1B; LYPLA2; EPS8L2; TMEM8A; NAPRT; SH3GLB2; BCAP31; COMT; SLC25A1; DPP9; SLC16A3; SPNS1; HRAS; PTBP1; HSPB1; NCLN; STXBP2; JUP; UNC93B1; PTGES2; ARHGDIA; ST14; CAPN1; RAB11B; AP2A1; ABHD11; POR; PSMA7; CLIC3; PRSS8; TUFM; RRAS; VAC14; ITGB4; GSTP1; AGTRAP; KCNN4; CIB1; BSG; ST…
Cytosol	66	1178	11.6608	1.90378	3.52264e-07	0.000276175	4.60291e-05	0.000244587	VPS28; PLEC; RPL8; HGS; ALDOA; APRT; SART1; NUTF2; HMGA1; PPP1CA; EEF1D; DGAT1; UBE2C; CD151; BAD; FPGS; RAB1B; MVD; BCAR1; PAK4; NDOR1; NAPRT; BCAP31; EIF3B; COMT; TUBGCP2; AXIN1; IRAK1; RELA; CEP131; HRAS; MAP2K2; STXBP2; NOSIP; FZR1; NOL3; RPL28; ARHGDIA; MAD1L1; DTYMK; SSNA1; ANAPC11; AP2A1; TUBA4A; TRAF2; GYS1; GPX1; PLK1; PPIA; STK25; STX4; PLCB3; VARS; BLVRB; ATXN2L; IRF3; MLST8; RPN1; CDC…
Ribosome	5	144	0.883392	1.18195	0.418464	1	1	1	PAM16; EIF6; EIF3B; RPL28; MRPL23;
Membrane fraction	12	346	2.12014	1.17926	0.321983	1	1	1	ADRM1; PKMYT1; GIPC1; ARFRP1; CD151; BCAR1; SLC16A3; SLC19A1; KDELR1; SPINT1; SLC4A2; PITPNM1;
Nucleolus	63	1257	11.1307	1.70305	2.39618e-05	0.0187861	0.00234826	0.0124781	HSF1; ZC3H3; EXOSC4; SNRPA; TBL3; PLEC; RPL8; SCAF1; H2AFX; NSUN5; POLR2H; HMGA1; RUVBL2; EIF6; MED15; PPP1CA; TRIM28; DAZAP1; NOC2L; BOP1; TRIM11; SH3GLB2; NACC1; ARPC1A; EXOSC5; RRP9; MRPL12; PITX1; NHP2; MDK; POP7; PTBP1; NCLN; JUP; H1FX; EXOSC7; NOSIP; PNKP; RRP1; NOL3; RPL28; NOC4L; HIST2H2AA3; ARPC1B; LSR; SIRT6; PSMA7; TUFM; RPP21; VDAC2; S100A16; SIRT7; CSTB; PPIA; USB1; DDX49; GAPDH; SMA…
Nucleoplasm	33	449	5.83039	2.49773	1.50193e-06	0.00117751	0.000168216	0.000893858	PKMYT1; H2AFX; CDT1; NELFB; SART1; POLR2H; MPG; MED15; UBE2C; POLD1; NELFA; TRIM11; NTHL1; XAB2; RELA; POLD4; PTBP1; FZR1; ANAPC11; POLR2I; SIRT6; SIVA1; E2F1; CIB1; PLK1; ACD; RPS6KB2; CKS1B; POLD2; ANXA11; TAF10; IRF3; CDC20;
Perinuclear region	5	131	0.883392	1.29924	0.342449	1	1	1	CD151; TNK2; HRAS; BAIAP2; MTX1;
Midbody	1	19	0.176678	1.80507	0.433283	1	1	1	ANXA11;
Centrosome	30	656	5.30035	1.55421	0.0117748	1	0.39017	1	RPL8; ALDOA; PPP4C; EEF1D; MZT2A; CCDC85B; SAC3D1; TRIM28; DAZAP1; MZT2B; SCYL1; RNPS1; KATNB1; TUBGCP2; CEP131; RPL28; MAD1L1; LRRC45; SSNA1; TUBA4A; POC1A; MAP3K11; TUFM; VAC14; PLK1; PPIA; GAPDH; CDC20; TKT; CFL1;
Endoplasmic reticulum	34	1104	6.00707	1.04662	0.417217	1	1	1	PAM16; PKMYT1; TMEM189; ATP6V0C; GPAA1; RCE1; EEF1D; DGAT1; PRKCSH; RAB1B; BCAR1; SMPD4; BCAP31; COMT; FAM3A; SPNS1; NCLN; UNC93B1; PTGES2; EBP; RTN4R; STUB1; POR; DPM2; RRAS; CIB1; EMD; TNFRSF6B; KDELR1; BIK; TAZ; TMC6; LONP1; RPN1;
Mitochondrial inner membrane presequence translocase complex	1	9	0.176678	3.80848	0.235805	1	1	1	TIMM17B;
Secretory granule	1	50	0.176678	0.686151	0.775905	1	1	1	STXBP2;
Nucleosome	2	44	0.353357	1.55167	0.373088	1	1	1	H2AFX; H1FX;
Protein phosphatase type 2A complex	1	13	0.176678	2.63754	0.321926	1	1	1	STRN4;
Endosome	8	303	1.41343	0.898113	0.671677	1	1	1	VPS28; HGS; RHOD; ATP6V0C; SPNS1; ZNRF1; PKN1; S100A11;
Cell surface	3	205	0.530035	0.498823	0.943029	1	1	1	MIF; HSPB1; STX4;
Oligosaccharyltransferase complex	1	9	0.176678	3.80848	0.235805	1	1	1	RPN1;
Extracellular	35	1825	6.18375	0.651752	0.998412	1	1	1	ADRM1; VPS28; MIF; HGS; CPSF1; CYC1; PDAP1; GSDMD; PAFAH1B3; FAM3A; GFER; MDK; JUP; INTS1; TRAF2; PRSS8; GPX1; VDAC2; STX10; FBRS; PTK6; TNFRSF6B; GAPDH; SPINT1; SPINT2; MDH2; PLCB3; NMB; AGRN; GPC1; RHBDD2; RPN1; EFNA4; TKT; CFL1;
Cytoskeleton	22	427	3.88693	1.75121	0.00823385	1	0.39017	1	PLEC; CORO1B; EIF6; PPP1CA; TSPO; INF2; PLEKHN1; SLC25A1; HSPB1; JUP; RHPN1; RRP1; ARHGDIA; TUFM; GPX1; PLK1; PPIA; GAPDH; TRAP1; ARF5; MTX1; CFL1;
Extracellular region	6	442	1.06007	0.461953	0.990737	1	1	1	MIF; MAP2K2; TUBA4A; PPIA; SPINT1; SPINT2;
Integrin complex	1	22	0.176678	1.55904	0.481915	1	1	1	ITGB4;
Internal side of plasma membrane	1	8	0.176678	4.28395	0.21262	1	1	1	GNB1L;
Nuclear pore	3	42	0.530035	2.43427	0.125689	1	1	1	RANGAP1; NUTF2; MAD1L1;
Membrane	14	350	2.4735	1.35992	0.153297	1	1	1	CD151; BCAP31; SLC16A3; RTN4R; CIB1; KDELR1; STX4; GPC1; MBOAT7; ATXN2L; SIGIRR; DRD4; RPN1; TACSTD2;
Extracellular space	2	404	0.353357	0.169028	0.999932	1	1	1	PRSS8; GPC1;
Extracellular matrix	1	120	0.176678	0.28593	0.972575	1	1	1	AGRN;
Endoplasmic reticulum membrane	4	150	0.706714	0.908196	0.64778	1	1	1	ALG3; BCAP31; DPM2; PEX16;
Ubiquitin ligase complex	1	43	0.176678	0.797824	0.72364	1	1	1	TRAF7;
Microtubule	9	129	1.59011	2.37278	0.0141172	1	0.425688	1	RANGAP1; PPP1CA; KATNB1; KIF22; HSPB1; TUBA4A; MAP3K11; PLK1; NME2;
NuA4 histone acetyltransferase complex	1	14	0.176678	2.44928	0.341897	1	1	1	RUVBL2;
Nuclear speck	1	31	0.176678	1.10656	0.604205	1	1	1	PRPF31;
Kinetochore	7	90	1.23675	2.64596	0.0168632	1	0.489656	1	RANGAP1; KIF22; MAD1L1; PLK1; SMARCA4; SPC24; CDC20;
Soluble fraction	8	180	1.41343	1.51179	0.162357	1	1	1	GIPC1; RANGAP1; COMT; CTU2; TNFRSF6B; SPINT1; SPINT2; NMB;
ER-Golgi intermediate compartment	5	30	0.883392	5.67188	0.00168085	1	0.109815	0.583532	SCYL1; YIF1A; KDELR1; ERGIC3; LMAN2;
Nuclear envelope	2	71	0.353357	0.961683	0.622465	1	1	1	EMD; ANXA11;
Focal adhesion	1	45	0.176678	0.762373	0.739705	1	1	1	TRIP6;
Gap junction	1	7	0.176678	4.89507	0.188733	1	1	1	GJB3;
Mitochondrial respiratory chain complex I	5	46	0.883392	3.69948	0.0110077	1	0.39017	1	NDUFS8; NDUFV1; NDUFB7; NDUFS6; NDUFB9;
Intracellular	6	151	1.06007	1.35215	0.285773	1	1	1	MAF1; RUVBL2; PRKCSH; NAA10; TELO2; VARS;
Cell-cell junction	3	38	0.530035	2.69044	0.100416	1	1	1	SCRIB; PKP3; JUP;
Trans-Golgi network	1	31	0.176678	1.10656	0.604205	1	1	1	SMPD4;
Mitochondrial small ribosomal subunit	1	17	0.176678	2.01731	0.398356	1	1	1	MRPS24;
Proteasome complex	5	34	0.883392	5.0048	0.00297986	1	0.166872	0.886718	ADRM1; PSMA7; PSMC3; UBXN1; PSMD4;
Golgi membrane	5	55	0.883392	3.09422	0.0225551	1	0.623665	1	PAK4; ARFGAP1; B4GALT2; BSG; STX10;
Cytoplasmic membrane-bounded vesicle	1	19	0.176678	1.80507	0.433283	1	1	1	GIPC1;
Peroxisomal membrane	2	13	0.353357	5.24897	0.0544331	1	0.909464	1	PEX14; PEX16;
Endosome membrane	2	27	0.353357	2.52829	0.188099	1	1	1	VAC14; IRF3;
Integrator complex	1	13	0.176678	2.63754	0.321926	1	1	1	INTS1;
Nuclear matrix	2	37	0.353357	1.84515	0.297438	1	1	1	CHMP1A; EIF6;
Cytoplasmic microtubule	1	8	0.176678	4.28395	0.21262	1	1	1	TUBGCP2;
Cytoplasmic vesicle membrane	1	5	0.176678	6.84919	0.138768	1	1	1	GIPC1;
Nuclear outer membrane	1	7	0.176678	4.89507	0.188733	1	1	1	EMD;
Protein complex	1	65	0.176678	0.527833	0.857036	1	1	1	CTU2;
Eukaryotic translation initiation factor 3 complex	1	15	0.176678	2.2861	0.361281	1	1	1	EIF3B;
Mitochondrial nucleoid	4	31	0.706714	4.39337	0.0124416	1	0.39017	1	TOP1MT; TUFM; VDAC2; LONP1;
Spindle	4	30	0.706714	4.53977	0.0110887	1	0.39017	1	MZT2B; MAD1L1; ANXA11; CDC20;
Transcription factor complex	2	43	0.353357	1.58775	0.362452	1	1	1	HMGA1; RELA;
Nuclear membrane	1	78	0.176678	0.439872	0.90319	1	1	1	EMD;
Late endosome	1	40	0.176678	0.857646	0.697669	1	1	1	CD151;
Mitochondrial outer membrane	4	29	0.706714	4.69626	0.00983431	1	0.39017	1	TSPO; BAD; TOMM34; VDAC2;
Cell cortex	1	20	0.176678	1.71486	0.44998	1	1	1	GIPC1;
Spindle pole	1	24	0.176678	1.42917	0.511998	1	1	1	KATNB1;
Anaphase-promoting complex	4	18	0.706714	7.5646	0.00163547	1	0.109815	0.583532	UBE2S; UBE2C; FZR1; ANAPC11;
Ruffle	3	24	0.530035	4.25922	0.032437	1	0.668928	1	BCAR1; NME2; S100A11;
Microsome	4	156	0.706714	0.873268	0.677861	1	1	1	ADRM1; COMT; VAC14; CFL1;
Lamellipodium	1	23	0.176678	1.49128	0.497181	1	1	1	NME2;
Intracellular membrane-bounded organelle	3	127	0.530035	0.805163	0.726206	1	1	1	HGS; NACC1; MVP;
Cell junction	2	38	0.353357	1.79661	0.308384	1	1	1	SCRIB; JUP;
Cis-Golgi network	1	9	0.176678	3.80848	0.235805	1	1	1	SCYL1;
Beta-catenin destruction complex	1	6	0.176678	5.70956	0.164123	1	1	1	AXIN1;
Mitochondrial matrix	3	79	0.530035	1.29431	0.412077	1	1	1	MDH2; LONP1; ECI1;
Mitochondrial alpha-ketoglutarate dehydrogenase complex	1	4	0.176678	8.55721	0.112644	1	1	1	BCKDK;
Plasma membrane enriched fraction	1	4	0.176678	8.55721	0.112644	1	1	1	STX4;
COPI vesicle coat	1	6	0.176678	5.70956	0.164123	1	1	1	SCYL1;
Peroxisome	5	111	0.883392	1.53331	0.229017	1	1	1	ACOT8; MVD; PEX14; PEX16; PRDX5;
MLL1 complex	2	27	0.353357	2.52829	0.188099	1	1	1	RUVBL2; PRPF31;
Mitochondrial ribosome	3	13	0.530035	7.8604	0.005819	1	0.304139	1	MRPL28; MRPS12; MRPL11;
Voltage-gated potassium channel complex	1	42	0.176678	0.816816	0.715241	1	1	1	KCNN4;
STAGA complex	1	12	0.176678	2.85715	0.301349	1	1	1	TAF10;
Spliceosomal complex	2	46	0.353357	1.48422	0.394138	1	1	1	SNRPA; SF3A2;
Lateral plasma membrane	1	8	0.176678	4.28395	0.21262	1	1	1	AXIN1;
Cell-cell adherens junction	2	13	0.353357	5.24897	0.0544331	1	0.909464	1	SCRIB; JUP;
Endomembrane system	1	5	0.176678	6.84919	0.138768	1	1	1	CHMP1A;
Basolateral plasma membrane	1	40	0.176678	0.857646	0.697669	1	1	1	STX4;
Early endosome	3	69	0.530035	1.48187	0.33179	1	1	1	HGS; CHMP1A; CD151;
Mitochondrial inner membrane	4	58	0.706714	2.34853	0.091031	1	1	1	SLC25A22; SLC25A1; NDUFV1; SLC25A10;
SNARE complex	1	9	0.176678	3.80848	0.235805	1	1	1	STXBP2;
Transcription factor TFIID complex	1	17	0.176678	2.01731	0.398356	1	1	1	TAF10;
Gamma-tubulin ring complex	1	6	0.176678	5.70956	0.164123	1	1	1	MZT2B;
Heterotrimeric G-protein complex	1	11	0.176678	3.11666	0.28015	1	1	1	GNA15;
Cytoplasmic vesicle	5	160	0.883392	1.06377	0.509602	1	1	1	DVL1; TRAF7; RAB1B; NOSIP; ZNRF1;
Nuclear inner membrane	1	10	0.176678	3.42801	0.258308	1	1	1	EMD;
Cytosolic large ribosomal subunit	2	36	0.353357	1.89639	0.286466	1	1	1	RPL8; RPL28;
Transport vesicle	1	21	0.176678	1.63324	0.466186	1	1	1	YIPF2;
Stored secretory granule	1	19	0.176678	1.80507	0.433283	1	1	1	CYBA;
Specific granule	3	8	0.530035	12.767	0.0012717	0.997013	0.0997013	0.529788	STXBP2; STX4; ANXA11;
Arp2/3 protein complex	1	7	0.176678	4.89507	0.188733	1	1	1	ARPC1B;
Intermediate filament	2	36	0.353357	1.89639	0.286466	1	1	1	KRT19; NME2;
NADPH oxidase complex	1	8	0.176678	4.28395	0.21262	1	1	1	CYBA;
Transcription factor TFTC complex	1	14	0.176678	2.44928	0.341897	1	1	1	TAF10;
Endocytic vesicle membrane	2	22	0.353357	3.10264	0.135876	1	1	1	AP2A1; AP2S1;
Chromosome	4	59	0.706714	2.30874	0.0955036	1	1	1	RUVBL2; EIF6; INO80B; INO80E;
Condensed nuclear chromosome	1	12	0.176678	2.85715	0.301349	1	1	1	CHMP1A;
Small nuclear ribonucleoprotein complex	3	16	0.530035	6.38749	0.0106713	1	0.39017	1	LSM4; RRP9; SF3A2;
SWI/SNF-type complex	1	6	0.176678	5.70956	0.164123	1	1	1	SMARCA4;
Integral to membrane of membrane fraction	1	8	0.176678	4.28395	0.21262	1	1	1	TOMM40;
Prefoldin complex	1	2	0.176678	17.0719	0.0580015	1	0.909464	1	PFDN2;
Mitochondrial large ribosomal subunit	3	8	0.530035	12.767	0.0012717	0.997013	0.0997013	0.529788	MRPL41; MRPL12; MRPL23;
U4 snRNP	1	2	0.176678	17.0719	0.0580015	1	0.909464	1	PRPF31;
Synapse	1	33	0.176678	1.03952	0.627199	1	1	1	SCRIB;
Exosome (RNase complex)	1	3	0.176678	11.4001	0.0857304	1	1	1	EXOSC7;
Interleukin-1 receptor complex	2	3	0.353357	22.6874	0.00254374	1	0.153407	0.815169	IRAK1; TRIP6;
SWI/SNF complex	1	13	0.176678	2.63754	0.321926	1	1	1	SMARCA4;
Apical membrane	1	16	0.176678	2.14331	0.380095	1	1	1	SLC9A3R2;
Clathrin coat of trans-Golgi network vesicle	1	3	0.176678	11.4001	0.0857304	1	1	1	AP2A1;
Integral to peroxisomal membrane	1	11	0.176678	3.11666	0.28015	1	1	1	PEX16;
Costamere	1	6	0.176678	5.70956	0.164123	1	1	1	KRT19;
Protein-DNA complex	1	5	0.176678	6.84919	0.138768	1	1	1	JUP;
Integral to mitochondrial outer membrane	1	6	0.176678	5.70956	0.164123	1	1	1	RHOT2;
Catenin complex	1	7	0.176678	4.89507	0.188733	1	1	1	JUP;
Peroxisomal matrix	1	11	0.176678	3.11666	0.28015	1	1	1	ACOT8;
DNA-directed RNA polymerase II, core complex	2	13	0.353357	5.24897	0.0544331	1	0.909464	1	POLR2H; POLR2I;
Axin-APC-beta-catenin-GSK3B complex	1	6	0.176678	5.70956	0.164123	1	1	1	AXIN1;
Cajal body	2	21	0.353357	3.25031	0.125866	1	1	1	SART1; PRPF31;
Cell leading edge	1	6	0.176678	5.70956	0.164123	1	1	1	SCRIB;
Cytoplasmic dynein complex	1	6	0.176678	5.70956	0.164123	1	1	1	DYNLRB1;
Mitochondrial outer membrane translocase complex	1	6	0.176678	5.70956	0.164123	1	1	1	TOMM40;
Phagocytic vesicle	1	4	0.176678	8.55721	0.112644	1	1	1	ANXA11;
Nuclear body	1	12	0.176678	2.85715	0.301349	1	1	1	NACC1;
Phosphorylase kinase complex	1	2	0.176678	17.0719	0.0580015	1	0.909464	1	PHKG2;
PCAF complex	1	6	0.176678	5.70956	0.164123	1	1	1	TAF10;
U6 snRNP	1	2	0.176678	17.0719	0.0580015	1	0.909464	1	LSM4;
Nuclear telomere cap complex	1	8	0.176678	4.28395	0.21262	1	1	1	ACD;
Chromosome, telomeric region	2	17	0.353357	4.01465	0.0879202	1	1	1	H2AFX; ACD;
I band	1	6	0.176678	5.70956	0.164123	1	1	1	ALDOA;
APC-Axin-1-beta-catenin complex	1	3	0.176678	11.4001	0.0857304	1	1	1	AXIN1;
MLL5-L complex	1	8	0.176678	4.28395	0.21262	1	1	1	PPP1CA;
Nuclear inclusion body	1	3	0.176678	11.4001	0.0857304	1	1	1	STUB1;
Basal lamina	1	7	0.176678	4.89507	0.188733	1	1	1	AGRN;
Nuclear telomeric heterochromatin	1	2	0.176678	17.0719	0.0580015	1	0.909464	1	SIRT6;
Acrosome	1	11	0.176678	3.11666	0.28015	1	1	1	CEP131;
AP-2 adaptor complex	2	6	0.353357	11.3626	0.0119906	1	0.39017	1	AP2A1; AP2S1;
Nucleolar riboNuclease P complex	1	5	0.176678	6.84919	0.138768	1	1	1	POP7;
Postsynaptic membrane	1	7	0.176678	4.89507	0.188733	1	1	1	SCRIB;
Clathrin coat	1	3	0.176678	11.4001	0.0857304	1	1	1	CLTB;
Desmosome	2	11	0.353357	6.20246	0.0398909	1	0.781862	1	EIF6; JUP;
Small nucleolar ribonucleoprotein complex	1	8	0.176678	4.28395	0.21262	1	1	1	RRP9;
Presynaptic membrane	1	5	0.176678	6.84919	0.138768	1	1	1	SCRIB;
Microtubule organizing center	2	10	0.353357	6.82209	0.0332758	1	0.668928	1	CHMP1A; TUBGCP2;
Zymogen granule	1	34	0.176678	1.00895	0.63819	1	1	1	VDAC2;
Transcription factor TFIIIC complex	1	6	0.176678	5.70956	0.164123	1	1	1	GTF3C5;
Pre-snoRNP complex	1	6	0.176678	5.70956	0.164123	1	1	1	PIH1D1;
Eukaryotic translation elongation factor 1 complex	1	3	0.176678	11.4001	0.0857304	1	1	1	EEF1D;
Cell projection	1	41	0.176678	0.836733	0.706586	1	1	1	KIFC2;
Cohesin complex	1	3	0.176678	11.4001	0.0857304	1	1	1	CDCA5;
Outer kinetochore of condensed nuclear chromosome	1	3	0.176678	11.4001	0.0857304	1	1	1	PLK1;
Azurophil granule	2	6	0.353357	11.3626	0.0119906	1	0.39017	1	STXBP2; ANXA11;
Vacuole	1	4	0.176678	8.55721	0.112644	1	1	1	STX4;
Glycosylphosphatidylinositol-N-acetylglucosaminyltransferase (GPI-GnT) complex	1	3	0.176678	11.4001	0.0857304	1	1	1	DPM2;
Secretory vesicle (None)	2	6	0.353357	11.3626	0.0119906	1	0.39017	1	SMPD4; FGFRL1;
Nucleolus organizer region	1	1	0.176678	33.9747	0.0294332	1	0.623665	1	SIRT7;
GPI-anchor transamidase complex	1	5	0.176678	6.84919	0.138768	1	1	1	GPAA1;
Tertiary granule	1	2	0.176678	17.0719	0.0580015	1	0.909464	1	STXBP2;
Catenin-TCF7L2 complex	1	1	0.176678	33.9747	0.0294332	1	0.623665	1	JUP;
Ubiquitin conjugating enzyme complex	1	3	0.176678	11.4001	0.0857304	1	1	1	STUB1;
Vesicle (None)	1	13	0.176678	2.63754	0.321926	1	1	1	TNK2;
PeBoW complex	1	3	0.176678	11.4001	0.0857304	1	1	1	BOP1;
Basolateral membrane	1	9	0.176678	3.80848	0.235805	1	1	1	SCRIB;
Ndc80 complex	1	4	0.176678	8.55721	0.112644	1	1	1	SPC24;
Extracellular vesicular exosome	1	1	0.176678	33.9747	0.0294332	1	0.623665	1	ALDOA;
Dolichol-phosphate-mannose synthase complex	1	3	0.176678	11.4001	0.0857304	1	1	1	DPM2;
Cyclin-dependent protein kinase activating kinase holoenzyme complex	1	6	0.176678	5.70956	0.164123	1	1	1	PUF60;
U4atac snRNP	1	1	0.176678	33.9747	0.0294332	1	0.623665	1	PRPF31;
U4/U6 x U5 tri-snRNP complex	1	4	0.176678	8.55721	0.112644	1	1	1	PRPF31;
Nuclear replication fork	1	4	0.176678	8.55721	0.112644	1	1	1	ZMIZ2;
Chromatin assembly complex	1	6	0.176678	5.70956	0.164123	1	1	1	NAP1L4;
Nuclear lamina	1	4	0.176678	8.55721	0.112644	1	1	1	LMNB2;
Cytosolic part	1	1	0.176678	33.9747	0.0294332	1	0.623665	1	PRDX5;
Katanin complex	1	1	0.176678	33.9747	0.0294332	1	0.623665	1	KATNB1;
Angiogenin-PRI complex	1	2	0.176678	17.0719	0.0580015	1	0.909464	1	RNH1;
mRNA cleavage and polyadenylation specificity factor complex	1	1	0.176678	33.9747	0.0294332	1	0.623665	1	CPSF1;
Gamma-catenin-TCF7L2 complex	1	1	0.176678	33.9747	0.0294332	1	0.623665	1	JUP;
Scrib-APC-beta-catenin complex	1	1	0.176678	33.9747	0.0294332	1	0.623665	1	SCRIB;

## Sheet: DAVID-GO-MF
Term	Count	1	2	3	PValue	4	5	6	Genes
Molecular function unknown	163	5685	28.7986	0.974178	0.672394	1	1	1	SHARPIN; ADRM1; MROH1; MFSD10; FAM83H; ADCK5; PPDPF; PAM16; TBL3; YDJC; TMUB1; CPTP; TMEM134; LRFN4; PPP1R16A; TSR3; RBM42; GET4; ZDHHC12; CYHR1; TIGD5; NSUN5; CORO1B; CCDC124; MACROD1; SART1; UQCC3; UBALD2; ARRDC1; ROMO1; HSPBP1; CYC1; MZT2A; CCDC85B; MFSD2B; PWWP2B; INO80B; COMMD5; SAC3D1; PHLDA2; NOC2L; BOP1; PPP1R35; MZT2B; PSMG3; PERM1; GSDMD; FAM189B; LIME1; REEP4; MXD3; SMPD4; PRR7; TMEM8A…
Protease inhibitor activity	4	94	0.706714	1.44919	0.299725	1	1	1	NOL3; CSTB; SPINT1; SPINT2;
Receptor signaling complex scaffold activity	19	322	3.35689	2.00571	0.00334348	0.748939	0.149788	0.691556	DVL1; HGS; TRAF7; EPN1; BCAR1; EPS8L2; AXIN1; SPNS1; SH2D3A; RHPN1; TRAF2; FKBP8; BIK; TRIP10; BAIAP2; SLC9A3R2; MLST8; TRAF4; AP2S1;
Deacetylase activity	2	14	0.353357	4.87431	0.0622977	1	0.77526	1	SIRT6; SIRT7;
Cell adhesion molecule activity	4	356	0.706714	0.382682	0.993666	1	1	1	PKP3; JUP; ITGB4; NDUFB7;
GTPase activity	13	222	2.29682	1.99095	0.0146374	1	0.446129	1	RHOD; GNB2; ARFRP1; RAB1B; RABL6; GNB1L; HRAS; GTPBP3; RRAS; GNA15; RHOT2; ARF5; RHOC;
Transporter activity	19	576	3.35689	1.12126	0.337864	1	1	1	VPS28; CHMP4B; SLC39A4; NUTF2; KATNB1; BCAP31; TMEM44; SLC25A1; UNC93B1; NOSIP; TOMM34; AP2A1; YIF1A; STX10; SLC25A10; DYNLRB1; LMAN2; TOMM40; MTX1;
Translation regulator activity	5	101	0.883392	1.68511	0.177127	1	1	1	EIF6; PPP1R13L; EIF3B; TUFM; RNH1;
ATPase activity	3	111	0.530035	0.921212	0.638511	1	1	1	ATAD3A; ATP6V0C; ATAD3B;
Protein-tyrosine kinase activity	3	38	0.530035	2.69044	0.100416	1	1	1	TNK2; PTK6; TWF2;
Catalytic activity	15	532	2.65018	0.958553	0.604704	1	1	1	GUK1; NDOR1; NAPRT; ACAD9; DGUOK; TK1; DTYMK; BCKDK; POR; NDUFS6; GAPDH; MDH2; MECR; CYBA; NME3;
Transferase activity	5	156	0.883392	1.09104	0.48728	1	1	1	APRT; ALG3; UCKL1; TRPT1; COASY;
GTPase activator activity	6	144	1.06007	1.41787	0.250753	1	1	1	RANGAP1; TBC1D10B; ARFGAP1; RASSF7; RAB11B; ARHGAP39;
Structural constituent of ribosome	13	152	2.29682	2.90777	0.000569184	0.127497	0.127497	0.588643	RPL8; MRPL52; MRPS34; MRPL41; MRPL12; RPL28; MRPL23; MRPS12; MRPL55; MRPS24; MRPL4; MRPL17; MRPL11;
Ion channel activity	1	66	0.176678	0.519837	0.861258	1	1	1	SLC25A39;
Hydrolase activity	10	203	1.76678	1.67522	0.0780553	1	0.874219	1	MPG; PGLS; OPLAH; ACOT8; NT5C; PNPLA2; NUDT8; PTRH1; PDF; HAGHL;
Protein binding	11	182	1.94346	2.05517	0.019155	1	0.446129	1	FZR1; GADD45GIP1; SIVA1; YIF1A; TNFRSF6B; NUDC; PEX14; PEX16; CKS1B; SPC24; CDC20;
Serine-type peptidase activity	4	98	0.706714	1.39005	0.326409	1	1	1	ST14; PRSS8; PRSS22; LONP1;
Receptor binding	1	129	0.176678	0.265983	0.979078	1	1	1	EFNA4;
Structural molecule activity	4	269	0.706714	0.506444	0.958379	1	1	1	CLTB; LMNB2; MRPL28; EMD;
Structural constituent of cytoskeleton	4	137	0.706714	0.994369	0.576521	1	1	1	ARPC1A; CEP131; TUBA4A; KRT19;
Cytoskeletal protein binding	7	218	1.23675	1.09244	0.461612	1	1	1	PAK4; TUBGCP2; INF2; ARPC1B; MIB2; TMSB10; CFL1;
Metallopeptidase activity	2	101	0.353357	0.676063	0.801986	1	1	1	CHMP1A; RCE1;
Peptide hormone	1	45	0.176678	0.762373	0.739705	1	1	1	NMB;
G-protein coupled receptor activity	4	736	0.706714	0.185104	1	1	1	1	SLC52A2; TPRA1; DRD4; PAQR4;
Cytoskeletal anchoring activity	2	39	0.353357	1.75055	0.319295	1	1	1	PLEC; GPAA1;
Lipid transporter activity	1	9	0.176678	3.80848	0.235805	1	1	1	PITPNM1;
Protein serine/threonine kinase activity	10	301	1.76678	1.12982	0.393601	1	1	1	RPS6KA4; CDK16; IRAK1; MKNK2; MAP3K11; PLK1; STK25; RPS6KB2; FASTK; PKN1;
Lyase activity	1	21	0.176678	1.63324	0.466186	1	1	1	ALDOA;
Transcription regulator activity	32	832	5.65371	1.30711	0.074804	1	0.874219	1	TONSL; MAF1; ZFPL1; MRGBP; PRICKLE3; NELFB; RPS6KA4; RUVBL2; MED15; GLI4; ZNF205; NELFA; TRIM28; SCYL1; ZNF593; HES4; MED25; DRAP1; MAD1L1; TSC22D4; NFKBIL1; TRIP6; BRMS1; ZMIZ2; ESRRA; ACD; ZNF282; SCAND1; NFKBIB; BUD31; TAF10; SNAPC2;
Extracellular matrix structural constituent	1	166	0.176678	0.206701	0.993133	1	1	1	AGRN;
Receptor activity	12	361	2.12014	1.13026	0.374964	1	1	1	ADRM1; GRINA; CD151; TSPO; RTN4R; FGFRL1; LSR; SIVA1; BSG; GPC1; MBOAT7; TACSTD2;
Glucosidase activity	1	9	0.176678	3.80848	0.235805	1	1	1	PRKCSH;
Ligand-dependent nuclear receptor activity	2	35	0.353357	1.95056	0.275476	1	1	1	OGFR; NR1H2;
Transcription factor activity	21	842	3.71025	0.847743	0.81263	1	1	1	HSF1; SLC2A4RG; NR2F6; GTF2IRD1; TNIP2; GMEB2; PITX1; RELA; MAZ; MAFK; RFXANK; E2F1; MYBL2; LBX2; SMARCA4; RBCK1; AATF; IRF3; GTF3C5; KLF16; NME2;
Oxidoreductase activity	9	161	1.59011	1.9012	0.0489516	1	0.764255	1	NDUFS8; TSTA3; DOHH; NDUFV1; PRDX5; NDUFB9; COX5B; COX8A; BLVRB;
Calcium ion binding	5	185	0.883392	0.920021	0.638385	1	1	1	HPCAL1; CIB1; S100A16; ANXA11; S100A11;
Carboxy-lyase activity	1	20	0.176678	1.71486	0.44998	1	1	1	MVD;
Ubiquitin-specific protease activity	17	377	3.00353	1.53288	0.0549312	1	0.764255	1	SCRIB; FBXL6; UBE2S; RNF126; TMEM189; UBE2C; OTUB1; TRIM11; UBE2M; DTX2; FBXW5; ZNRF1; PSMA7; PSMC3; PSMD4; RPN1; FBXL8;
Ligase activity	8	112	1.41343	2.42958	0.0176656	1	0.446129	1	FPGS; CDC34; STUB1; ANAPC11; GYS1; GSS; RNF7; VARS;
Growth factor activity	1	110	0.176678	0.311921	0.96296	1	1	1	GFER;
Binding	2	22	0.353357	3.10264	0.135876	1	1	1	GIPC1; RHBDF1;
DNA repair protein	2	57	0.353357	1.19784	0.503274	1	1	1	XAB2; PNKP;
Acyltransferase activity	6	80	1.06007	2.55203	0.0304618	1	0.568621	1	DGAT1; PAFAH1B3; COMT; NAA10; TAZ; AGPAT2;
RNA binding	13	366	2.29682	1.20765	0.283393	1	1	1	LSM4; PUF60; RALY; SNRPA; SCAF1; CPSF1; ZGPAT; PUSL1; DAZAP1; RNPS1; PRPF31; NHP2; SF3A2;
Ribonuclease activity	6	48	1.06007	4.25303	0.00271968	0.609208	0.149788	0.691556	EXOSC4; EXOSC5; POP7; EXOSC7; RPP21; RNASEH2A;
Methyltransferase activity	1	59	0.176678	0.581502	0.82887	1	1	1	PRMT1;
DNA binding	23	654	4.0636	1.19533	0.217717	1	1	1	ZC3H3; RAD23A; ZNF707; H2AFX; CDT1; ZNF598; HMGA1; ZNF787; ZNF579; ZNF524; ZNF408; CHTF18; KIF22; HMG20B; H1FX; HIST2H2AA3; ZNF628; HIST3H2A; XRCC3; ZNF581; ZNF768; DNTTIP1; BANF1;
Chaperone activity	4	126	0.706714	1.08117	0.510315	1	1	1	PFDN2; CDC37; HSPB1; NAP1L4;
Auxiliary transport protein activity	9	333	1.59011	0.919227	0.649353	1	1	1	SLC35C2; SLC25A22; SLC16A3; TIMM17B; SLC19A1; GJB3; STX4; SLC4A2; MTX1;
Motor activity	3	79	0.530035	1.29431	0.412077	1	1	1	MOSPD3; ELMO3; KIFC2;
Isomerase activity	4	45	0.706714	3.02685	0.0427998	1	0.737474	1	PTGES2; EBP; PPIA; ECI1;
Voltage-gated ion channel activity	1	130	0.176678	0.263937	0.979698	1	1	1	VDAC2;
DNA-directed RNA polymerase activity	2	29	0.353357	2.35399	0.209695	1	1	1	POLR2H; POLR2I;
Cysteine-type peptidase activity	1	46	0.176678	0.745804	0.747384	1	1	1	CAPN1;
DNA-directed DNA polymerase activity	3	20	0.530035	5.11063	0.0199165	1	0.446129	1	POLD1; POLD4; POLD2;
Peptidase activity	1	58	0.176678	0.591526	0.823664	1	1	1	NCLN;
Heat shock protein activity	1	27	0.176678	1.27043	0.553886	1	1	1	TRAP1;
Phosphatase regulator activity	1	16	0.176678	2.14331	0.380095	1	1	1	PPP1R14B;
Protein tyrosine/serine/threonine phosphatase activity	1	37	0.176678	0.927166	0.669262	1	1	1	SSH3;
Guanyl-nucleotide exchange factor activity	1	112	0.176678	0.306351	0.96512	1	1	1	EEF1D;
Intracellular ligand-gated ion channel activity	2	30	0.353357	2.27555	0.220585	1	1	1	CLIC3; KCNN4;
Phospholipase activity	2	45	0.353357	1.5172	0.383652	1	1	1	LYPLA2; PLCB3;
Protein threonine/tyrosine kinase activity	2	28	0.353357	2.43803	0.198862	1	1	1	PKMYT1; MAP2K2;
Cytokine activity	4	107	0.706714	1.27314	0.38675	1	1	1	MIF; MDK; FBRS; TNFRSF6B;
Enzyme regulator activity	2	13	0.353357	5.24897	0.0544331	1	0.764255	1	AURKAIP1; DPM2;
Transmembrane receptor activity	1	52	0.176678	0.659766	0.788936	1	1	1	LTBR;
Galactosyltransferase activity	1	38	0.176678	0.902774	0.679015	1	1	1	B4GALT2;
Deoxyribonuclease activity	2	17	0.353357	4.01465	0.0879202	1	0.937815	1	NTHL1; ENDOG;
Helicase activity	2	25	0.353357	2.73047	0.166845	1	1	1	RECQL4; DDX49;
Ubiquitin binding	3	9	0.530035	11.35	0.00186597	0.417976	0.149788	0.691556	ANKRD13D; UBXN1; RBCK1;
Aminopeptidase activity	2	29	0.353357	2.35399	0.209695	1	1	1	RNPEPL1; DPP9;
Ribonucleoprotein	3	41	0.530035	2.49363	0.11917	1	1	1	RRP9; PTBP1; MRPL28;
Growth factor binding	1	8	0.176678	4.28395	0.21262	1	1	1	PDAP1;
Nucleocytoplasmic transporter activity	1	2	0.176678	17.0719	0.0580015	1	0.764255	1	MVP;
Phosphorylase activity	1	20	0.176678	1.71486	0.44998	1	1	1	PHKG2;
Peroxidase activity	2	20	0.353357	3.41275	0.116044	1	1	1	GPX1; GPX4;
Glutathione transferase activity	1	21	0.176678	1.63324	0.466186	1	1	1	GSTP1;
RNA methyltransferase activity	1	12	0.176678	2.85715	0.301349	1	1	1	TRMT61A;
Peptide binding	2	6	0.353357	11.3626	0.0119906	1	0.446129	1	BAD; CAPNS1;
Protein serine/threonine phosphatase activity	2	44	0.353357	1.55167	0.373088	1	1	1	PPP4C; PPP1CA;
Transferase activity, transferring aldehyde or ketonic groups	2	3	0.353357	22.6874	0.00254374	0.569799	0.149788	0.691556	TALDO1; TKT;
DNA topoisomerase activity	1	6	0.176678	5.70956	0.164123	1	1	1	TOP1MT;
Catalase activity	1	1	0.176678	33.9747	0.0294332	1	0.568621	1	MGAT4B;
Endonuclease activity	1	7	0.176678	4.89507	0.188733	1	1	1	TSEN34;

## Sheet: DAVID-GO-BP
Term	Count	1	2	3	PValue	4	5	6	Genes
Biological_process unknown	126	4731	22.2615	0.904912	0.914532	1	1	1	SHARPIN; MROH1; MFSD10; FAM83H; ADCK5; PPDPF; TBL3; YDJC; CPTP; TMEM134; LRFN4; TSR3; RBM42; GET4; ZDHHC12; CYHR1; TIGD5; CCDC124; SART1; UQCC3; UBALD2; ARRDC1; MED15; ROMO1; MZT2A; CCDC85B; MFSD2B; PWWP2B; INO80B; COMMD5; NOC2L; BOP1; PPP1R35; MZT2B; PSMG3; PERM1; GSDMD; FAM189B; LIME1; REEP4; MXD3; SMPD4; PRR7; CHCHD2; NUDT22; SH3GLB2; NACC1; FAM110A; INF2; PLEKHN1; TMEM44; SAMD10; TRABD; TSNAR…
Regulation of nucleobase, nucleoside, nucleotide and nucleic acid metabolism	114	2828	20.1413	1.36967	0.000228242	0.0406272	0.0406272	0.221111	HSF1; ZC3H3; TONSL; MAF1; SLC2A4RG; LSM4; ZFPL1; EXOSC4; PUF60; MRGBP; RALY; SNRPA; SCAF1; ZNF707; CPSF1; CDT1; PRICKLE3; ZNF598; NELFB; MACROD1; POLR2H; RPS6KA4; ZGPAT; HMGA1; NR2F6; RUVBL2; ZNF787; GLI4; ZNF579; TOP1MT; ZNF205; UCKL1; POLD1; TRPT1; NELFA; GTF2IRD1; PUSL1; TRIM28; DAZAP1; FPGS; TNIP2; GMEB2; SCYL1; RNPS1; ZNF524; ZNF593; ZNF408; CHTF18; KIF22; HES4; NAPRT; NTHL1; HMG20B; XAB2; T…
Signal transduction	109	3934	19.258	0.941426	0.778477	1	1	1	SLC52A2; ADRM1; DVL1; PAM16; MIF; PKP3; HGS; GIPC1; PPP1R16A; GUK1; GRINA; RHOD; CORO1B; GNB2; RANGAP1; RPS6KA4; TRAF7; EPN1; OGFR; ARFRP1; PPP4C; EEF1D; HPCAL1; TSPO; PDAP1; SAC3D1; RAB1B; CDK16; SCYL1; BCAR1; RABL6; EPS8L2; AUP1; AURKAIP1; GNB1L; TBC1D10B; TNK2; AXIN1; TBRG4; IRAK1; GFER; SPNS1; MDK; HRAS; MAP2K2; RASSF7; SH2D3A; RIN1; STXBP2; JUP; RHPN1; STRN4; LTBR; RTN4R; FZR1; GADD45GIP1; N…
Cell communication	101	3713	17.8445	0.924259	0.828617	1	1	1	SLC52A2; ADRM1; DVL1; MIF; PKP3; HGS; PPP1R16A; GUK1; RHOD; GNB2; RANGAP1; RPS6KA4; TRAF7; EPN1; OGFR; ARFRP1; PPP4C; EEF1D; HPCAL1; CD151; TSPO; PDAP1; SAC3D1; RAB1B; CDK16; SCYL1; BCAR1; RABL6; EPS8L2; AUP1; AURKAIP1; GNB1L; TBC1D10B; TBRG4; IRAK1; GFER; SPNS1; MDK; HRAS; MAP2K2; RASSF7; SH2D3A; RIN1; STXBP2; JUP; RHPN1; STRN4; LTBR; RTN4R; FZR1; GADD45GIP1; NOL3; MAD1L1; RAB11B; AGAP3; MKNK2; …
Metabolism	65	1683	11.4841	1.31235	0.0142925	1	0.424012	1	ATAD3A; PPP1R14B; ALDOA; NDUFS8; ALG3; PGLS; CYC1; TPRA1; DGAT1; OPLAH; PRKCSH; FPGS; NT5C; MVD; PAFAH1B3; LYPLA2; NDOR1; COMT; ACAD9; DPP9; DGUOK; PTGES2; TSTA3; TALDO1; EBP; NAA10; STUB1; PNPLA2; TK1; DTYMK; NUDT8; PTRH1; BCKDK; POR; B4GALT2; DPM2; PRMT1; ISOC2; NDUFV1; GYS1; GSTP1; NDUFB7; PDF; NDUFS6; GSS; GAPDH; PRDX5; HAGHL; NDUFB9; TAZ; MDH2; COX5B; PLCB3; COX8A; VARS; MECR; BLVRB; ECI1; C…
Energy pathways	64	1633	11.3074	1.33172	0.0112104	1	0.399091	1	ATAD3A; PPP1R14B; ALDOA; NDUFS8; ALG3; PGLS; CYC1; TPRA1; DGAT1; OPLAH; PRKCSH; FPGS; NT5C; MVD; PAFAH1B3; LYPLA2; NDOR1; COMT; ACAD9; DPP9; DGUOK; PTGES2; TSTA3; TALDO1; EBP; NAA10; STUB1; PNPLA2; TK1; DTYMK; NUDT8; PTRH1; BCKDK; POR; B4GALT2; PRMT1; ISOC2; NDUFV1; GYS1; GSTP1; NDUFB7; PDF; NDUFS6; GSS; GAPDH; PRDX5; HAGHL; NDUFB9; TAZ; MDH2; COX5B; PLCB3; COX8A; VARS; MECR; BLVRB; ECI1; CYBA; P…
Protein metabolism	57	1323	10.0707	1.46401	0.00245906	0.437712	0.154485	0.840777	SCRIB; FBXL6; UBE2S; TMUB1; RPL8; CHMP1A; RNF126; TMEM189; GPAA1; RCE1; HSPBP1; MRPL52; UBE2C; RNPEPL1; OTUB1; PFDN2; TRIM11; UBE2M; MRPS34; CDC34; EIF3B; DTX2; MRPL41; BTBD2; CDC37; FBXW5; HSPB1; NCLN; SF3A2; ZNRF1; MRPL28; RPL28; ST14; CAPN1; MRPL23; MRPS12; PSMA7; MRPL55; PRSS8; TUFM; MRPS24; PRSS22; PSMC3; CSTB; NUBP2; MRPL4; SPINT1; SPINT2; RPS6KB2; LONP1; RBCK1; PSMD4; TRAP1; MRPL17; MRPL11…
Transport	31	1215	5.47703	0.867116	0.821118	1	1	1	VPS28; CHMP4B; SLC39A4; NUTF2; ATP6V0C; SLC35C2; SLC25A39; BCAP31; MFSD3; TMEM44; SLC25A22; SLC25A1; SLC16A3; TIMM17B; UNC93B1; NOSIP; SLC19A1; TOMM34; AP2A1; CLIC3; GJB3; KCNN4; YIF1A; VDAC2; STX10; KDELR1; SLC25A10; LMAN2; TOMM40; SLC4A2; MTX1;
Cell growth and/or maintenance	25	1125	4.41696	0.755288	0.946153	1	1	1	NSUN5; MOSPD3; PAK4; ELMO3; TMEM8A; KATNB1; KIFC2; TUBGCP2; ARPC1A; CEP131; CLTB; LMNB2; ARHGDIA; MVP; ARPC1B; TUBA4A; EMD; TRIP10; MIB2; SSH3; KRT19; AGRN; TMSB10; TPD52L2; CFL1;
Apoptosis	12	220	2.12014	1.85462	0.0301027	1	0.446523	1	PPP1R13L; BAD; PHLDA2; BCL2L12; BBC3; SIVA1; FKBP8; TNFRSF6B; BIK; FASTK; AATF; TRAF4;
DNA repair	5	58	0.883392	2.9342	0.0276746	1	0.446523	1	RECQL4; RAD23A; H2AFX; MPG; XRCC3;
Lipid metabolism	5	33	0.883392	5.15641	0.00260369	0.463456	0.154485	0.840777	ACOT8; ARFGAP1; TAZ; AGPAT2; PITPNM1;
Immune response	4	576	0.706714	0.236521	0.99997	1	1	1	IFRD2; TNFRSF6B; DNTTIP1; LY6E;
Anti-apoptosis	3	32	0.530035	3.19475	0.0670063	1	0.897648	1	GPX1; TNFRSF6B; RNF7;
Cell cycle	3	22	0.530035	4.64624	0.0257667	1	0.446523	1	BAD; CDC20; PITPNM1;
RNA metabolism	2	26	0.353357	2.62549	0.177422	1	1	1	MRPL28; INTS1;
Regulation of gene expression, epigenetic	2	66	0.353357	1.03453	0.582597	1	1	1	BRMS1; SCAND1;
Protein folding	2	16	0.353357	4.2654	0.0790683	1	0.897648	1	PPIA; CAPNS1;
Cell motility	2	20	0.353357	3.41275	0.116044	1	0.983613	1	CD151; PAK4;
Transcription	2	46	0.353357	1.48422	0.394138	1	1	1	ZNF787; INTS1;
Ribosome biogenesis and assembly	2	4	0.353357	17.0297	0.00498825	0.887908	0.221977	1	NHP2; MRPS12;
Regulation of cell cycle	1	57	0.176678	0.601902	0.8183	1	1	1	MAD1L1;
Regulation of cell proliferation	1	23	0.176678	1.49128	0.497181	1	1	1	TRAF4;
Purine salvage	1	1	0.176678	33.9747	0.0294332	1	0.446523	1	APRT;
Proteolysis and peptidolysis	1	16	0.176678	2.14331	0.380095	1	1	1	UBXN1;
Regulation of cell growth	1	21	0.176678	1.63324	0.466186	1	1	1	FGFRL1;
Peptide metabolism	1	4	0.176678	8.55721	0.112644	1	0.983613	1	PPIA;
Negative regulation of enzyme activity	1	3	0.176678	11.4001	0.0857304	1	0.897648	1	PKMYT1;
Cytoskeleton organization and biogenesis	1	21	0.176678	1.63324	0.466186	1	1	1	INF2;
Cell adhesion	1	54	0.176678	0.635335	0.801211	1	1	1	ITGB4;
Cell proliferation	1	39	0.176678	0.879632	0.688481	1	1	1	PPP1CA;
Cell differentiation	1	29	0.176678	1.18285	0.579797	1	1	1	CEP131;
Protein modification	1	20	0.176678	1.71486	0.44998	1	1	1	DOHH;
Cell-cell signaling	1	16	0.176678	2.14331	0.380095	1	1	1	ARHGAP39;
Cell migration	1	15	0.176678	2.2861	0.361281	1	1	1	ITGB4;
Wound healing	1	3	0.176678	11.4001	0.0857304	1	0.897648	1	ITGB4;
Regulation of translation	1	13	0.176678	2.63754	0.321926	1	1	1	EIF6;
Cytoskeletal anchoring	1	4	0.176678	8.55721	0.112644	1	0.983613	1	PLEC;
Regulation of enzyme activity	1	5	0.176678	6.84919	0.138768	1	1	1	AURKAIP1;
Mitosis	1	5	0.176678	6.84919	0.138768	1	1	1	ANAPC11;
Protein transport	1	11	0.176678	3.11666	0.28015	1	1	1	ARFGAP1;
Vesicle docking	1	4	0.176678	8.55721	0.112644	1	0.983613	1	SYTL1;
Peroxisome organization and biogenesis	1	1	0.176678	33.9747	0.0294332	1	0.446523	1	PEX16;
Glycoprotein metabolism	1	1	0.176678	33.9747	0.0294332	1	0.446523	1	MGAT4B;
Lipoprotein metabolism	1	3	0.176678	11.4001	0.0857304	1	0.897648	1	LSR;

## Sheet: DAVID-KEGG
Term	Count	1	2	Fold Enrichment	PValue	4	5	6	Genes
ptr01100:Proteoglycan syndecan-mediated signaling events	56	1342	9.89399	1.41796	0.00521368	1	0.116132	0.437055	DVL1; HGS; GIPC1; ALDOA; RPS6KA4; HMGA1; EPN1; RUVBL2; MED15; PPP1CA; PPP1R13L; BAD; TRIM28; BCAR1; PAK4; AXIN1; RELA; MDK; ARFGAP1; CLTB; HRAS; MAP2K2; RIN1; HSPB1; JUP; ARHGDIA; BBC3; ARPC1B; TK1; AP2A1; TRAF2; RRAS; TRIP6; GNA15; GYS1; ITGB4; GPX1; E2F1; BSG; PLK1; FKBP8; KDELR1; TRIP10; GAPDH; SMARCA4; STX4; BAIAP2; KRT19; DYNLRB1; NFKBIB; PKN1; ARF5; TAF10; SLC9A3R2; MLST8; NME2;
ptr01100:IFN-gamma pathway	55	1293	9.71731	1.44542	0.00380942	1	0.100859	0.379577	DVL1; HGS; ALDOA; RPS6KA4; HMGA1; EPN1; RUVBL2; MED15; PPP1CA; PPP1R13L; BAD; TRIM28; BCAR1; PAK4; AXIN1; RELA; ARFGAP1; CLTB; HRAS; MAP2K2; RIN1; HSPB1; JUP; PTGES2; ARHGDIA; BBC3; ARPC1B; TK1; AP2A1; MAP3K11; TRAF2; RRAS; TRIP6; GNA15; GYS1; ITGB4; GPX1; E2F1; PLK1; FKBP8; KDELR1; TRIP10; GAPDH; SMARCA4; STX4; BAIAP2; KRT19; DYNLRB1; NFKBIB; PKN1; ARF5; TAF10; SLC9A3R2; MLST8; NME2;
ptr01100:Glypican pathway	55	1335	9.71731	1.39995	0.00721595	1	0.116132	0.437055	DVL1; HGS; ALDOA; RPS6KA4; HMGA1; EPN1; RUVBL2; MED15; PPP1CA; PPP1R13L; BAD; TRIM28; BCAR1; PAK4; AXIN1; RELA; MDK; ARFGAP1; CLTB; HRAS; MAP2K2; RIN1; HSPB1; JUP; ARHGDIA; BBC3; ARPC1B; TK1; AP2A1; TRAF2; RRAS; TRIP6; GNA15; GYS1; ITGB4; GPX1; E2F1; PLK1; FKBP8; KDELR1; TRIP10; GAPDH; SMARCA4; STX4; BAIAP2; KRT19; DYNLRB1; NFKBIB; PKN1; GPC1; ARF5; TAF10; SLC9A3R2; MLST8; NME2;
ptr01100:Glypican 1 network	54	1296	9.54064	1.41586	0.0062228	1	0.116132	0.437055	DVL1; HGS; ALDOA; RPS6KA4; HMGA1; EPN1; RUVBL2; MED15; PPP1CA; PPP1R13L; BAD; TRIM28; BCAR1; PAK4; AXIN1; RELA; ARFGAP1; CLTB; HRAS; MAP2K2; RIN1; HSPB1; JUP; ARHGDIA; BBC3; ARPC1B; TK1; AP2A1; TRAF2; RRAS; TRIP6; GNA15; GYS1; ITGB4; GPX1; E2F1; PLK1; FKBP8; KDELR1; TRIP10; GAPDH; SMARCA4; STX4; BAIAP2; KRT19; DYNLRB1; NFKBIB; PKN1; GPC1; ARF5; TAF10; SLC9A3R2; MLST8; NME2;
ptr01100:PAR1-mediated thrombin signaling events	54	1296	9.54064	1.41586	0.0062228	1	0.116132	0.437055	DVL1; HGS; ALDOA; RPS6KA4; HMGA1; EPN1; RUVBL2; MED15; PPP1CA; PPP1R13L; BAD; TRIM28; BCAR1; PAK4; AXIN1; RELA; ARFGAP1; CLTB; HRAS; MAP2K2; RIN1; HSPB1; JUP; ARHGDIA; BBC3; ARPC1B; TK1; AP2A1; TRAF2; RRAS; TRIP6; GNA15; GYS1; ITGB4; GPX1; E2F1; PLK1; FKBP8; KDELR1; TRIP10; GAPDH; SMARCA4; STX4; BAIAP2; PLCB3; KRT19; DYNLRB1; NFKBIB; PKN1; ARF5; TAF10; SLC9A3R2; MLST8; NME2;
ptr01100:Syndecan-1-mediated signaling events	54	1297	9.54064	1.41477	0.00631682	1	0.116132	0.437055	DVL1; HGS; ALDOA; RPS6KA4; HMGA1; EPN1; RUVBL2; MED15; PPP1CA; PPP1R13L; BAD; TRIM28; BCAR1; PAK4; AXIN1; RELA; ARFGAP1; CLTB; HRAS; MAP2K2; RIN1; HSPB1; JUP; ARHGDIA; BBC3; ARPC1B; TK1; AP2A1; TRAF2; RRAS; TRIP6; GNA15; GYS1; ITGB4; GPX1; E2F1; BSG; PLK1; FKBP8; KDELR1; TRIP10; GAPDH; SMARCA4; STX4; BAIAP2; KRT19; DYNLRB1; NFKBIB; PKN1; ARF5; TAF10; SLC9A3R2; MLST8; NME2;
ptr01100:Thrombin/protease-activated receptor (PAR) pathway	54	1297	9.54064	1.41477	0.00631682	1	0.116132	0.437055	DVL1; HGS; ALDOA; RPS6KA4; HMGA1; EPN1; RUVBL2; MED15; PPP1CA; PPP1R13L; BAD; TRIM28; BCAR1; PAK4; AXIN1; RELA; ARFGAP1; CLTB; HRAS; MAP2K2; RIN1; HSPB1; JUP; ARHGDIA; BBC3; ARPC1B; TK1; AP2A1; TRAF2; RRAS; TRIP6; GNA15; GYS1; ITGB4; GPX1; E2F1; PLK1; FKBP8; KDELR1; TRIP10; GAPDH; SMARCA4; STX4; BAIAP2; PLCB3; KRT19; DYNLRB1; NFKBIB; PKN1; ARF5; TAF10; SLC9A3R2; MLST8; NME2;
ptr01100:Plasma membrane estrogen receptor signaling	54	1298	9.54064	1.41368	0.00641204	1	0.116132	0.437055	DVL1; HGS; ALDOA; RPS6KA4; HMGA1; EPN1; RUVBL2; MED15; PPP1CA; PPP1R13L; BAD; TRIM28; BCAR1; PAK4; AXIN1; RELA; ARFGAP1; CLTB; HRAS; MAP2K2; RIN1; HSPB1; JUP; ARHGDIA; BBC3; ARPC1B; TK1; AP2A1; TRAF2; RRAS; TRIP6; GNA15; GYS1; ITGB4; GPX1; E2F1; PLK1; FKBP8; KDELR1; TRIP10; GAPDH; SMARCA4; STX4; BAIAP2; PLCB3; KRT19; DYNLRB1; NFKBIB; PKN1; ARF5; TAF10; SLC9A3R2; MLST8; NME2;
ptr01100:Endothelins	54	1304	9.54064	1.40718	0.00700941	1	0.116132	0.437055	DVL1; HGS; ALDOA; RPS6KA4; HMGA1; EPN1; RUVBL2; MED15; PPP1CA; PPP1R13L; BAD; TRIM28; BCAR1; PAK4; AXIN1; RELA; ARFGAP1; CLTB; HRAS; MAP2K2; RIN1; HSPB1; JUP; ARHGDIA; BBC3; ARPC1B; TK1; AP2A1; TRAF2; RRAS; TRIP6; GNA15; GYS1; ITGB4; GPX1; E2F1; PLK1; FKBP8; KDELR1; TRIP10; GAPDH; SMARCA4; STX4; BAIAP2; PLCB3; KRT19; DYNLRB1; NFKBIB; PKN1; ARF5; TAF10; SLC9A3R2; MLST8; NME2;
ptr01100:LKB1 signaling events	54	1305	9.54064	1.4061	0.00711343	1	0.116132	0.437055	DVL1; HGS; ALDOA; RPS6KA4; HMGA1; EPN1; RUVBL2; MED15; PPP1CA; PPP1R13L; BAD; TRIM28; BCAR1; PAK4; AXIN1; RELA; CDC37; ARFGAP1; CLTB; HRAS; MAP2K2; RIN1; HSPB1; JUP; ARHGDIA; BBC3; ARPC1B; TK1; AP2A1; TRAF2; RRAS; TRIP6; GNA15; GYS1; ITGB4; GPX1; E2F1; PLK1; FKBP8; KDELR1; TRIP10; GAPDH; SMARCA4; STX4; BAIAP2; KRT19; DYNLRB1; NFKBIB; PKN1; ARF5; TAF10; SLC9A3R2; MLST8; NME2;
ptr01100:TRAIL signaling pathway	54	1325	9.54064	1.38487	0.00948555	1	0.120778	0.45454	DVL1; HGS; ALDOA; RPS6KA4; HMGA1; EPN1; RUVBL2; MED15; PPP1CA; PPP1R13L; BAD; TRIM28; BCAR1; PAK4; AXIN1; RELA; ARFGAP1; CLTB; HRAS; MAP2K2; LMNB2; RIN1; HSPB1; JUP; ARHGDIA; BBC3; ARPC1B; TK1; AP2A1; TRAF2; RRAS; TRIP6; GNA15; GYS1; ITGB4; GPX1; E2F1; PLK1; FKBP8; KDELR1; TRIP10; GAPDH; SMARCA4; STX4; BAIAP2; KRT19; DYNLRB1; NFKBIB; PKN1; ARF5; TAF10; SLC9A3R2; MLST8; NME2;
ptr01100:Beta1 integrin cell surface interactions	54	1348	9.54064	1.36125	0.0130012	1	0.137253	0.516542	DVL1; HGS; ALDOA; RPS6KA4; HMGA1; EPN1; RUVBL2; MED15; PPP1CA; PPP1R13L; BAD; TRIM28; BCAR1; PAK4; AXIN1; RELA; MDK; ARFGAP1; CLTB; HRAS; MAP2K2; RIN1; HSPB1; JUP; ARHGDIA; BBC3; ARPC1B; TK1; AP2A1; TRAF2; RRAS; TRIP6; GNA15; GYS1; ITGB4; GPX1; E2F1; PLK1; FKBP8; KDELR1; TRIP10; GAPDH; SMARCA4; STX4; BAIAP2; KRT19; DYNLRB1; NFKBIB; PKN1; ARF5; TAF10; SLC9A3R2; MLST8; NME2;
ptr01100:Integrin family cell surface interactions	54	1375	9.54064	1.33452	0.0184403	1	0.169003	0.636032	DVL1; HGS; ALDOA; RPS6KA4; HMGA1; EPN1; RUVBL2; MED15; PPP1CA; PPP1R13L; BAD; TRIM28; BCAR1; PAK4; AXIN1; RELA; MDK; ARFGAP1; CLTB; HRAS; MAP2K2; RIN1; HSPB1; JUP; ARHGDIA; BBC3; ARPC1B; TK1; AP2A1; TRAF2; RRAS; TRIP6; GNA15; GYS1; ITGB4; GPX1; E2F1; PLK1; FKBP8; KDELR1; TRIP10; GAPDH; SMARCA4; STX4; BAIAP2; KRT19; DYNLRB1; NFKBIB; PKN1; ARF5; TAF10; SLC9A3R2; MLST8; NME2;
ptr01100:Insulin Pathway	53	1285	9.36396	1.40154	0.00811654	1	0.116132	0.437055	DVL1; HGS; ALDOA; RPS6KA4; HMGA1; EPN1; RUVBL2; MED15; PPP1CA; PPP1R13L; BAD; TRIM28; BCAR1; PAK4; AXIN1; RELA; ARFGAP1; CLTB; HRAS; MAP2K2; RIN1; HSPB1; JUP; ARHGDIA; BBC3; ARPC1B; TK1; AP2A1; TRAF2; RRAS; TRIP6; GNA15; GYS1; ITGB4; GPX1; E2F1; PLK1; FKBP8; KDELR1; TRIP10; GAPDH; SMARCA4; STX4; BAIAP2; KRT19; DYNLRB1; NFKBIB; PKN1; ARF5; TAF10; SLC9A3R2; MLST8; NME2;
ptr01100:Internalization of ErbB1	53	1285	9.36396	1.40154	0.00811654	1	0.116132	0.437055	DVL1; HGS; ALDOA; RPS6KA4; HMGA1; EPN1; RUVBL2; MED15; PPP1CA; PPP1R13L; BAD; TRIM28; BCAR1; PAK4; AXIN1; RELA; ARFGAP1; CLTB; HRAS; MAP2K2; RIN1; HSPB1; JUP; ARHGDIA; BBC3; ARPC1B; TK1; AP2A1; TRAF2; RRAS; TRIP6; GNA15; GYS1; ITGB4; GPX1; E2F1; PLK1; FKBP8; KDELR1; TRIP10; GAPDH; SMARCA4; STX4; BAIAP2; KRT19; DYNLRB1; NFKBIB; PKN1; ARF5; TAF10; SLC9A3R2; MLST8; NME2;
ptr01100:Urokinase-type plasminogen activator (uPA) and uPAR-mediated signaling	53	1285	9.36396	1.40154	0.00811654	1	0.116132	0.437055	DVL1; HGS; ALDOA; RPS6KA4; HMGA1; EPN1; RUVBL2; MED15; PPP1CA; PPP1R13L; BAD; TRIM28; BCAR1; PAK4; AXIN1; RELA; ARFGAP1; CLTB; HRAS; MAP2K2; RIN1; HSPB1; JUP; ARHGDIA; BBC3; ARPC1B; TK1; AP2A1; TRAF2; RRAS; TRIP6; GNA15; GYS1; ITGB4; GPX1; E2F1; PLK1; FKBP8; KDELR1; TRIP10; GAPDH; SMARCA4; STX4; BAIAP2; KRT19; DYNLRB1; NFKBIB; PKN1; ARF5; TAF10; SLC9A3R2; MLST8; NME2;
ptr01100:PDGFR-beta signaling pathway	53	1285	9.36396	1.40154	0.00811654	1	0.116132	0.437055	DVL1; HGS; ALDOA; RPS6KA4; HMGA1; EPN1; RUVBL2; MED15; PPP1CA; PPP1R13L; BAD; TRIM28; BCAR1; PAK4; AXIN1; RELA; ARFGAP1; CLTB; HRAS; MAP2K2; RIN1; HSPB1; JUP; ARHGDIA; BBC3; ARPC1B; TK1; AP2A1; TRAF2; RRAS; TRIP6; GNA15; GYS1; ITGB4; GPX1; E2F1; PLK1; FKBP8; KDELR1; TRIP10; GAPDH; SMARCA4; STX4; BAIAP2; KRT19; DYNLRB1; NFKBIB; PKN1; ARF5; TAF10; SLC9A3R2; MLST8; NME2;
ptr01100:EGF receptor (ErbB1) signaling pathway	53	1285	9.36396	1.40154	0.00811654	1	0.116132	0.437055	DVL1; HGS; ALDOA; RPS6KA4; HMGA1; EPN1; RUVBL2; MED15; PPP1CA; PPP1R13L; BAD; TRIM28; BCAR1; PAK4; AXIN1; RELA; ARFGAP1; CLTB; HRAS; MAP2K2; RIN1; HSPB1; JUP; ARHGDIA; BBC3; ARPC1B; TK1; AP2A1; TRAF2; RRAS; TRIP6; GNA15; GYS1; ITGB4; GPX1; E2F1; PLK1; FKBP8; KDELR1; TRIP10; GAPDH; SMARCA4; STX4; BAIAP2; KRT19; DYNLRB1; NFKBIB; PKN1; ARF5; TAF10; SLC9A3R2; MLST8; NME2;
ptr01100:Class I PI3K signaling events	53	1285	9.36396	1.40154	0.00811654	1	0.116132	0.437055	DVL1; HGS; ALDOA; RPS6KA4; HMGA1; EPN1; RUVBL2; MED15; PPP1CA; PPP1R13L; BAD; TRIM28; BCAR1; PAK4; AXIN1; RELA; ARFGAP1; CLTB; HRAS; MAP2K2; RIN1; HSPB1; JUP; ARHGDIA; BBC3; ARPC1B; TK1; AP2A1; TRAF2; RRAS; TRIP6; GNA15; GYS1; ITGB4; GPX1; E2F1; PLK1; FKBP8; KDELR1; TRIP10; GAPDH; SMARCA4; STX4; BAIAP2; KRT19; DYNLRB1; NFKBIB; PKN1; ARF5; TAF10; SLC9A3R2; MLST8; NME2;
ptr01100:Arf6 signaling events	53	1285	9.36396	1.40154	0.00811654	1	0.116132	0.437055	DVL1; HGS; ALDOA; RPS6KA4; HMGA1; EPN1; RUVBL2; MED15; PPP1CA; PPP1R13L; BAD; TRIM28; BCAR1; PAK4; AXIN1; RELA; ARFGAP1; CLTB; HRAS; MAP2K2; RIN1; HSPB1; JUP; ARHGDIA; BBC3; ARPC1B; TK1; AP2A1; TRAF2; RRAS; TRIP6; GNA15; GYS1; ITGB4; GPX1; E2F1; PLK1; FKBP8; KDELR1; TRIP10; GAPDH; SMARCA4; STX4; BAIAP2; KRT19; DYNLRB1; NFKBIB; PKN1; ARF5; TAF10; SLC9A3R2; MLST8; NME2;
ptr01100:mTOR signaling pathway	53	1285	9.36396	1.40154	0.00811654	1	0.116132	0.437055	DVL1; HGS; ALDOA; RPS6KA4; HMGA1; EPN1; RUVBL2; MED15; PPP1CA; PPP1R13L; BAD; TRIM28; BCAR1; PAK4; AXIN1; RELA; ARFGAP1; CLTB; HRAS; MAP2K2; RIN1; HSPB1; JUP; ARHGDIA; BBC3; ARPC1B; TK1; AP2A1; TRAF2; RRAS; TRIP6; GNA15; GYS1; ITGB4; GPX1; E2F1; PLK1; FKBP8; KDELR1; TRIP10; GAPDH; SMARCA4; STX4; BAIAP2; KRT19; DYNLRB1; NFKBIB; PKN1; ARF5; TAF10; SLC9A3R2; MLST8; NME2;
ptr01100:Signaling events mediated by focal adhesion kinase	53	1285	9.36396	1.40154	0.00811654	1	0.116132	0.437055	DVL1; HGS; ALDOA; RPS6KA4; HMGA1; EPN1; RUVBL2; MED15; PPP1CA; PPP1R13L; BAD; TRIM28; BCAR1; PAK4; AXIN1; RELA; ARFGAP1; CLTB; HRAS; MAP2K2; RIN1; HSPB1; JUP; ARHGDIA; BBC3; ARPC1B; TK1; AP2A1; TRAF2; RRAS; TRIP6; GNA15; GYS1; ITGB4; GPX1; E2F1; PLK1; FKBP8; KDELR1; TRIP10; GAPDH; SMARCA4; STX4; BAIAP2; KRT19; DYNLRB1; NFKBIB; PKN1; ARF5; TAF10; SLC9A3R2; MLST8; NME2;
ptr01100:Arf6 downstream pathway	53	1285	9.36396	1.40154	0.00811654	1	0.116132	0.437055	DVL1; HGS; ALDOA; RPS6KA4; HMGA1; EPN1; RUVBL2; MED15; PPP1CA; PPP1R13L; BAD; TRIM28; BCAR1; PAK4; AXIN1; RELA; ARFGAP1; CLTB; HRAS; MAP2K2; RIN1; HSPB1; JUP; ARHGDIA; BBC3; ARPC1B; TK1; AP2A1; TRAF2; RRAS; TRIP6; GNA15; GYS1; ITGB4; GPX1; E2F1; PLK1; FKBP8; KDELR1; TRIP10; GAPDH; SMARCA4; STX4; BAIAP2; KRT19; DYNLRB1; NFKBIB; PKN1; ARF5; TAF10; SLC9A3R2; MLST8; NME2;
ptr01100:S1P1 pathway	53	1285	9.36396	1.40154	0.00811654	1	0.116132	0.437055	DVL1; HGS; ALDOA; RPS6KA4; HMGA1; EPN1; RUVBL2; MED15; PPP1CA; PPP1R13L; BAD; TRIM28; BCAR1; PAK4; AXIN1; RELA; ARFGAP1; CLTB; HRAS; MAP2K2; RIN1; HSPB1; JUP; ARHGDIA; BBC3; ARPC1B; TK1; AP2A1; TRAF2; RRAS; TRIP6; GNA15; GYS1; ITGB4; GPX1; E2F1; PLK1; FKBP8; KDELR1; TRIP10; GAPDH; SMARCA4; STX4; BAIAP2; KRT19; DYNLRB1; NFKBIB; PKN1; ARF5; TAF10; SLC9A3R2; MLST8; NME2;
ptr01100:ErbB1 downstream signaling	53	1285	9.36396	1.40154	0.00811654	1	0.116132	0.437055	DVL1; HGS; ALDOA; RPS6KA4; HMGA1; EPN1; RUVBL2; MED15; PPP1CA; PPP1R13L; BAD; TRIM28; BCAR1; PAK4; AXIN1; RELA; ARFGAP1; CLTB; HRAS; MAP2K2; RIN1; HSPB1; JUP; ARHGDIA; BBC3; ARPC1B; TK1; AP2A1; TRAF2; RRAS; TRIP6; GNA15; GYS1; ITGB4; GPX1; E2F1; PLK1; FKBP8; KDELR1; TRIP10; GAPDH; SMARCA4; STX4; BAIAP2; KRT19; DYNLRB1; NFKBIB; PKN1; ARF5; TAF10; SLC9A3R2; MLST8; NME2;
ptr01100:Arf6 trafficking events	53	1285	9.36396	1.40154	0.00811654	1	0.116132	0.437055	DVL1; HGS; ALDOA; RPS6KA4; HMGA1; EPN1; RUVBL2; MED15; PPP1CA; PPP1R13L; BAD; TRIM28; BCAR1; PAK4; AXIN1; RELA; ARFGAP1; CLTB; HRAS; MAP2K2; RIN1; HSPB1; JUP; ARHGDIA; BBC3; ARPC1B; TK1; AP2A1; TRAF2; RRAS; TRIP6; GNA15; GYS1; ITGB4; GPX1; E2F1; PLK1; FKBP8; KDELR1; TRIP10; GAPDH; SMARCA4; STX4; BAIAP2; KRT19; DYNLRB1; NFKBIB; PKN1; ARF5; TAF10; SLC9A3R2; MLST8; NME2;
ptr01100:Class I PI3K signaling events mediated by Akt	53	1285	9.36396	1.40154	0.00811654	1	0.116132	0.437055	DVL1; HGS; ALDOA; RPS6KA4; HMGA1; EPN1; RUVBL2; MED15; PPP1CA; PPP1R13L; BAD; TRIM28; BCAR1; PAK4; AXIN1; RELA; ARFGAP1; CLTB; HRAS; MAP2K2; RIN1; HSPB1; JUP; ARHGDIA; BBC3; ARPC1B; TK1; AP2A1; TRAF2; RRAS; TRIP6; GNA15; GYS1; ITGB4; GPX1; E2F1; PLK1; FKBP8; KDELR1; TRIP10; GAPDH; SMARCA4; STX4; BAIAP2; KRT19; DYNLRB1; NFKBIB; PKN1; ARF5; TAF10; SLC9A3R2; MLST8; NME2;
ptr01100:EGFR-dependent Endothelin signaling events	53	1286	9.36396	1.40045	0.00823561	1	0.116132	0.437055	DVL1; HGS; ALDOA; RPS6KA4; HMGA1; EPN1; RUVBL2; MED15; PPP1CA; PPP1R13L; BAD; TRIM28; BCAR1; PAK4; AXIN1; RELA; ARFGAP1; CLTB; HRAS; MAP2K2; RIN1; HSPB1; JUP; ARHGDIA; BBC3; ARPC1B; TK1; AP2A1; TRAF2; RRAS; TRIP6; GNA15; GYS1; ITGB4; GPX1; E2F1; PLK1; FKBP8; KDELR1; TRIP10; GAPDH; SMARCA4; STX4; BAIAP2; KRT19; DYNLRB1; NFKBIB; PKN1; ARF5; TAF10; SLC9A3R2; MLST8; NME2;
ptr01100:IGF1 pathway	53	1288	9.36396	1.39828	0.00847818	1	0.116132	0.437055	DVL1; HGS; ALDOA; RPS6KA4; HMGA1; EPN1; RUVBL2; MED15; PPP1CA; PPP1R13L; BAD; TRIM28; BCAR1; PAK4; AXIN1; RELA; ARFGAP1; CLTB; HRAS; MAP2K2; RIN1; HSPB1; JUP; ARHGDIA; BBC3; ARPC1B; TK1; AP2A1; TRAF2; RRAS; TRIP6; GNA15; GYS1; ITGB4; GPX1; E2F1; PLK1; FKBP8; KDELR1; TRIP10; GAPDH; SMARCA4; STX4; BAIAP2; KRT19; DYNLRB1; NFKBIB; PKN1; ARF5; TAF10; SLC9A3R2; MLST8; NME2;
ptr01100:GMCSF-mediated signaling events	53	1289	9.36396	1.39719	0.00860171	1	0.116132	0.437055	DVL1; HGS; ALDOA; RPS6KA4; HMGA1; EPN1; RUVBL2; MED15; PPP1CA; PPP1R13L; BAD; TRIM28; BCAR1; PAK4; AXIN1; RELA; ARFGAP1; CLTB; HRAS; MAP2K2; RIN1; HSPB1; JUP; ARHGDIA; BBC3; ARPC1B; TK1; AP2A1; TRAF2; RRAS; TRIP6; GNA15; GYS1; ITGB4; GPX1; E2F1; PLK1; FKBP8; KDELR1; TRIP10; GAPDH; SMARCA4; STX4; BAIAP2; KRT19; DYNLRB1; NFKBIB; PKN1; ARF5; TAF10; SLC9A3R2; MLST8; NME2;
ptr01100:IL5-mediated signaling events	53	1289	9.36396	1.39719	0.00860171	1	0.116132	0.437055	DVL1; HGS; ALDOA; RPS6KA4; HMGA1; EPN1; RUVBL2; MED15; PPP1CA; PPP1R13L; BAD; TRIM28; BCAR1; PAK4; AXIN1; RELA; ARFGAP1; CLTB; HRAS; MAP2K2; RIN1; HSPB1; JUP; ARHGDIA; BBC3; ARPC1B; TK1; AP2A1; TRAF2; RRAS; TRIP6; GNA15; GYS1; ITGB4; GPX1; E2F1; PLK1; FKBP8; KDELR1; TRIP10; GAPDH; SMARCA4; STX4; BAIAP2; KRT19; DYNLRB1; NFKBIB; PKN1; ARF5; TAF10; SLC9A3R2; MLST8; NME2;
ptr01100:Signaling events mediated by Hepatocyte Growth Factor Receptor (c-Met)	53	1290	9.36396	1.39611	0.00872675	1	0.116132	0.437055	DVL1; HGS; ALDOA; RPS6KA4; HMGA1; EPN1; RUVBL2; MED15; PPP1CA; PPP1R13L; BAD; TRIM28; BCAR1; PAK4; AXIN1; RELA; ARFGAP1; CLTB; HRAS; MAP2K2; RIN1; HSPB1; JUP; ARHGDIA; BBC3; ARPC1B; TK1; AP2A1; TRAF2; RRAS; TRIP6; GNA15; GYS1; ITGB4; GPX1; E2F1; PLK1; FKBP8; KDELR1; TRIP10; GAPDH; SMARCA4; STX4; BAIAP2; KRT19; DYNLRB1; NFKBIB; PKN1; ARF5; TAF10; SLC9A3R2; MLST8; NME2;
ptr01100:PDGF receptor signaling network	53	1290	9.36396	1.39611	0.00872675	1	0.116132	0.437055	DVL1; HGS; ALDOA; RPS6KA4; HMGA1; EPN1; RUVBL2; MED15; PPP1CA; PPP1R13L; BAD; TRIM28; BCAR1; PAK4; AXIN1; RELA; ARFGAP1; CLTB; HRAS; MAP2K2; RIN1; HSPB1; JUP; ARHGDIA; BBC3; ARPC1B; TK1; AP2A1; TRAF2; RRAS; TRIP6; GNA15; GYS1; ITGB4; GPX1; E2F1; PLK1; FKBP8; KDELR1; TRIP10; GAPDH; SMARCA4; STX4; BAIAP2; KRT19; DYNLRB1; NFKBIB; PKN1; ARF5; TAF10; SLC9A3R2; MLST8; NME2;
ptr01100:Nectin adhesion pathway	53	1292	9.36396	1.39395	0.00898142	1	0.116132	0.437055	DVL1; HGS; ALDOA; RPS6KA4; HMGA1; EPN1; RUVBL2; MED15; PPP1CA; PPP1R13L; BAD; TRIM28; BCAR1; PAK4; AXIN1; RELA; ARFGAP1; CLTB; HRAS; MAP2K2; RIN1; HSPB1; JUP; ARHGDIA; BBC3; ARPC1B; TK1; AP2A1; TRAF2; RRAS; TRIP6; GNA15; GYS1; ITGB4; GPX1; E2F1; PLK1; FKBP8; KDELR1; TRIP10; GAPDH; SMARCA4; STX4; BAIAP2; KRT19; DYNLRB1; NFKBIB; PKN1; ARF5; TAF10; SLC9A3R2; MLST8; NME2;
ptr01100:IL3-mediated signaling events	53	1292	9.36396	1.39395	0.00898142	1	0.116132	0.437055	DVL1; HGS; ALDOA; RPS6KA4; HMGA1; EPN1; RUVBL2; MED15; PPP1CA; PPP1R13L; BAD; TRIM28; BCAR1; PAK4; AXIN1; RELA; ARFGAP1; CLTB; HRAS; MAP2K2; RIN1; HSPB1; JUP; ARHGDIA; BBC3; ARPC1B; TK1; AP2A1; TRAF2; RRAS; TRIP6; GNA15; GYS1; ITGB4; GPX1; E2F1; PLK1; FKBP8; KDELR1; TRIP10; GAPDH; SMARCA4; STX4; BAIAP2; KRT19; DYNLRB1; NFKBIB; PKN1; ARF5; TAF10; SLC9A3R2; MLST8; NME2;
ptr01100:Signaling events mediated by VEGFR1 and VEGFR2	53	1293	9.36396	1.39287	0.00911108	1	0.116902	0.439954	DVL1; HGS; ALDOA; RPS6KA4; HMGA1; EPN1; RUVBL2; MED15; PPP1CA; PPP1R13L; BAD; TRIM28; BCAR1; PAK4; AXIN1; RELA; ARFGAP1; CLTB; HRAS; MAP2K2; RIN1; HSPB1; JUP; ARHGDIA; BBC3; ARPC1B; TK1; AP2A1; TRAF2; RRAS; TRIP6; GNA15; GYS1; ITGB4; GPX1; E2F1; PLK1; FKBP8; KDELR1; TRIP10; GAPDH; SMARCA4; STX4; BAIAP2; KRT19; DYNLRB1; NFKBIB; PKN1; ARF5; TAF10; SLC9A3R2; MLST8; NME2;
ptr01100:VEGF and VEGFR signaling network	53	1301	9.36396	1.38431	0.0102061	1	0.127998	0.481713	DVL1; HGS; ALDOA; RPS6KA4; HMGA1; EPN1; RUVBL2; MED15; PPP1CA; PPP1R13L; BAD; TRIM28; BCAR1; PAK4; AXIN1; RELA; ARFGAP1; CLTB; HRAS; MAP2K2; RIN1; HSPB1; JUP; ARHGDIA; BBC3; ARPC1B; TK1; AP2A1; TRAF2; RRAS; TRIP6; GNA15; GYS1; ITGB4; GPX1; E2F1; PLK1; FKBP8; KDELR1; TRIP10; GAPDH; SMARCA4; STX4; BAIAP2; KRT19; DYNLRB1; NFKBIB; PKN1; ARF5; TAF10; SLC9A3R2; MLST8; NME2;
ptr01100:Alpha9 beta1 integrin signaling events	53	1302	9.36396	1.38324	0.0103504	1	0.128839	0.484878	DVL1; HGS; ALDOA; RPS6KA4; HMGA1; EPN1; RUVBL2; MED15; PPP1CA; PPP1R13L; BAD; TRIM28; BCAR1; PAK4; AXIN1; RELA; ARFGAP1; CLTB; HRAS; MAP2K2; RIN1; HSPB1; JUP; ARHGDIA; BBC3; ARPC1B; TK1; AP2A1; TRAF2; RRAS; TRIP6; GNA15; GYS1; ITGB4; GPX1; E2F1; PLK1; FKBP8; KDELR1; TRIP10; GAPDH; SMARCA4; STX4; BAIAP2; KRT19; DYNLRB1; NFKBIB; PKN1; ARF5; TAF10; SLC9A3R2; MLST8; NME2;
ptr01100:ErbB receptor signaling network	53	1308	9.36396	1.3769	0.0112525	1	0.132177	0.497442	DVL1; HGS; ALDOA; RPS6KA4; HMGA1; EPN1; RUVBL2; MED15; PPP1CA; PPP1R13L; BAD; TRIM28; BCAR1; PAK4; AXIN1; RELA; ARFGAP1; CLTB; HRAS; MAP2K2; RIN1; HSPB1; JUP; ARHGDIA; BBC3; ARPC1B; TK1; AP2A1; TRAF2; RRAS; TRIP6; GNA15; GYS1; ITGB4; GPX1; E2F1; PLK1; FKBP8; KDELR1; TRIP10; GAPDH; SMARCA4; STX4; BAIAP2; KRT19; DYNLRB1; NFKBIB; PKN1; ARF5; TAF10; SLC9A3R2; MLST8; NME2;
ptr01100:Sphingosine 1-phosphate (S1P) pathway	53	1308	9.36396	1.3769	0.0112525	1	0.132177	0.497442	DVL1; HGS; ALDOA; RPS6KA4; HMGA1; EPN1; RUVBL2; MED15; PPP1CA; PPP1R13L; BAD; TRIM28; BCAR1; PAK4; AXIN1; RELA; ARFGAP1; CLTB; HRAS; MAP2K2; RIN1; HSPB1; JUP; ARHGDIA; BBC3; ARPC1B; TK1; AP2A1; TRAF2; RRAS; TRIP6; GNA15; GYS1; ITGB4; GPX1; E2F1; PLK1; FKBP8; KDELR1; TRIP10; GAPDH; SMARCA4; STX4; BAIAP2; KRT19; DYNLRB1; NFKBIB; PKN1; ARF5; TAF10; SLC9A3R2; MLST8; NME2;
ptr01100:Metabolism	43	823	7.59717	1.7755	0.000205057	0.342036	0.0337299	0.12694	LSM4; EXOSC4; RPL8; GUK1; GNB2; APRT; NDUFS8; CYC1; UBE2C; OPLAH; FPGS; NT5C; RNPS1; NAPRT; COMT; EXOSC5; DGUOK; HSPB1; EXOSC7; NOSIP; SLC19A1; TALDO1; FZR1; RPL28; TK1; DTYMK; ANAPC11; PSMA7; NDUFV1; GSTP1; GPX1; BSG; NDUFB7; PSMC3; NDUFS6; GSS; NDUFB9; MDH2; COX5B; PSMD4; COX8A; TKT; COASY;
ptr01100:Cell Cycle, Mitotic	30	1208	5.30035	0.844016	0.85751	1	1	1	HGS; ATP6V0C; EPN1; PPP1CA; UBE2C; BAD; BCAR1; AXIN1; IRAK1; RELA; HRAS; MAP2K2; FZR1; ARHGDIA; ANAPC11; AP2A1; PSMA7; GNA15; ITGB4; BSG; PSMC3; RPS6KB2; PLCB3; NMB; PSMD4; AATF; DRD4; MLST8; RHOC; AP2S1;
ptr01100:Mesenchymal-to-epithelial transition	29	755	5.12367	1.30542	0.0876506	1	0.445735	1	ALDOA; RPS6KA4; RUVBL2; MED15; PPP1CA; BAD; BCAR1; PAK4; TNK2; AXIN1; RELA; HRAS; MAP2K2; HSPB1; ARHGDIA; ARPC1B; MAP3K11; TRAF2; TRIP6; ITGB4; E2F1; FKBP8; SMARCA4; BAIAP2; KRT19; DYNLRB1; PKN1; CYBA; CFL1;
ptr01100:DNA Replication	29	768	5.12367	1.28332	0.10243	1	0.50251	1	ALDOA; RPS6KA4; RUVBL2; MED15; PPP1CA; BAD; BCAR1; PAK4; TNK2; AXIN1; RELA; HRAS; MAP2K2; HSPB1; ARHGDIA; ARPC1B; MAP3K11; TRAF2; TRIP6; ITGB4; E2F1; FKBP8; SMARCA4; BAIAP2; KRT19; DYNLRB1; PKN1; CYBA; CFL1;
ptr01100:Gene Expression	24	317	4.24028	2.57321	2.49407e-05	0.041601	0.0208005	0.0782815	PKMYT1; CDT1; RANGAP1; UBE2C; POLD1; TUBGCP2; POLD4; CEP131; FZR1; MAD1L1; SSNA1; ANAPC11; TUBA4A; PSMA7; E2F1; PLK1; MYBL2; PSMC3; NUDC; PSMD4; CKS1B; POLD2; SPC24; CDC20;
ptr01100:HIV Infection	23	223	4.0636	3.50548	1.9792e-07	0.00033013	0.00033013	0.00124243	PKP3; RHOD; PHLDA2; EPS8L2; ELMO3; COMT; SH2D3A; JUP; ST14; CAPN1; LSR; ABHD11; PRSS8; ITGB4; EPS8L1; PTK6; BIK; SPINT1; SPINT2; SSH3; TMC6; KRT19; TACSTD2;
ptr01100:Mitotic M-M/G1 phases	22	654	3.88693	1.14338	0.28963	1	0.916703	1	PPP1R14B; ALDOA; RPS6KA4; RUVBL2; MED15; PPP1CA; BAD; AXIN1; RELA; CDC37; HRAS; MAP2K2; HSPB1; TRAF2; TRIP6; ITGB4; E2F1; FKBP8; SMARCA4; KRT19; DYNLRB1; PKN1;
ptr01100:TNF alpha/NF-kB	20	261	3.53357	2.60463	9.86032e-05	0.16447	0.0309406	0.116443	CDT1; RANGAP1; UBE2C; POLD1; POLD4; CEP131; FZR1; MAD1L1; SSNA1; ANAPC11; TUBA4A; PSMA7; E2F1; PLK1; PSMC3; NUDC; PSMD4; POLD2; SPC24; CDC20;
ptr01100:Metabolism of mRNA	20	621	3.53357	1.09472	0.371784	1	1	1	ALDOA; RPS6KA4; RUVBL2; MED15; PPP1CA; BAD; AXIN1; RELA; HRAS; MAP2K2; HSPB1; TRAF2; TRIP6; ITGB4; E2F1; FKBP8; SMARCA4; KRT19; DYNLRB1; PKN1;
ptr01100:Metabolism of RNA	18	378	3.18021	1.6187	0.0316646	1	0.230011	0.865634	SNRPA; RPL8; CPSF1; NELFB; POLR2H; MED15; EEF1D; NELFA; TRIM28; RNPS1; EIF3B; MED25; PTBP1; SF3A2; RPL28; POLR2I; VARS; TAF10;
ptr01100:Host Interactions of HIV factors	17	203	3.00353	2.8467	0.000111297	0.185644	0.0309406	0.116443	NELFB; RANGAP1; POLR2H; HMGA1; UBE2C; NELFA; FZR1; ANAPC11; POLR2I; AP2A1; PSMA7; PSMC3; PPIA; PSMD4; TAF10; AP2S1; BANF1;
ptr01100:Apoptosis	17	242	3.00353	2.38796	0.000864151	1	0.0739194	0.278191	CDT1; RANGAP1; UBE2C; CEP131; FZR1; MAD1L1; SSNA1; ANAPC11; TUBA4A; PSMA7; E2F1; PLK1; PSMC3; NUDC; PSMD4; SPC24; CDC20;
ptr01100:S Phase	17	432	3.00353	1.33772	0.138885	1	0.595527	1	RPL8; RPS6KA4; MED15; MED25; RELA; HRAS; MAP2K2; DRAP1; RPL28; AP2A1; RRAS; ARHGAP39; AGRN; GPC1; RHOC; AP2S1; CFL1;
ptr01100:Mitotic G1-G1/S phases	17	522	3.00353	1.10708	0.369351	1	1	1	UBE2C; PRKCSH; TNIP2; IRAK1; RELA; HRAS; MAP2K2; FZR1; ANAPC11; PSMA7; TRAF2; PSMC3; PSMD4; NFKBIB; IRF3; SIGIRR; MLST8;
ptr01100:Signalling by NGF	15	171	2.65018	2.98205	0.000167049	0.278637	0.0332024	0.124955	RPL8; POLR2H; PPP1R13L; PFDN2; TNIP2; CDC34; RELA; CDC37; HSPB1; TRAF2; PSMC3; RPS6KB2; NFKBIB; PKN1; TRAF4;
ptr01100:M Phase	14	234	2.4735	2.03404	0.00970908	1	0.122687	0.461727	LSM4; EXOSC4; RPL8; UBE2C; RNPS1; EXOSC5; HSPB1; EXOSC7; FZR1; RPL28; ANAPC11; PSMA7; PSMC3; PSMD4;
ptr01100:Mitotic G2-G2/M phases	14	281	2.4735	1.69384	0.0392876	1	0.267837	1	LSM4; EXOSC4; RPL8; UBE2C; RNPS1; EXOSC5; HSPB1; EXOSC7; FZR1; RPL28; ANAPC11; PSMA7; PSMC3; PSMD4;
ptr01100:Regulation of mRNA Stability by Proteins that Bind AU-rich Elements	13	375	2.29682	1.17866	0.312714	1	0.964043	1	BCAR1; KIF22; HMG20B; SLC16A3; HRAS; TUBA4A; MAFK; GNA15; BSG; PPIA; STX4; AP2S1; CFL1;
ptr01100:Synthesis of DNA	12	141	2.12014	2.89367	0.000956818	1	0.0739194	0.278191	RANGAP1; HMGA1; UBE2C; FZR1; ANAPC11; AP2A1; PSMA7; PSMC3; PPIA; PSMD4; AP2S1; BANF1;
ptr01100:G1/S Transition	12	158	2.12014	2.58234	0.00252666	1	0.0891367	0.335461	PLEC; UBE2C; BAD; BCAP31; FZR1; BBC3; ANAPC11; PSMA7; TRAF2; E2F1; PSMC3; PSMD4;
ptr01100:The citric acid (TCA) cycle and respiratory electron transport	12	259	2.12014	1.57537	0.0821304	1	0.430841	1	RPL8; ALG3; GPAA1; EEF1D; PFDN2; PRKCSH; EIF3B; RPL28; DOHH; DPM2; MGAT4B; RPN1;
ptr01100:Formation and Maturation of mRNA Transcript	12	305	2.12014	1.33778	0.190242	1	0.711486	1	RPS6KA4; MED15; PPP1CA; BAD; AXIN1; HSPB1; TRAF2; E2F1; FKBP8; KRT19; DYNLRB1; PKN1;
ptr01100:G2/M Transition	12	305	2.12014	1.33778	0.190242	1	0.711486	1	RPS6KA4; MED15; PPP1CA; BAD; AXIN1; HSPB1; TRAF2; E2F1; FKBP8; KRT19; DYNLRB1; PKN1;
ptr01100:Signaling by EGFR	12	305	2.12014	1.33778	0.190242	1	0.711486	1	RPS6KA4; MED15; PPP1CA; BAD; AXIN1; HSPB1; TRAF2; E2F1; FKBP8; KRT19; DYNLRB1; PKN1;
ptr01100:HIV Life Cycle	12	321	2.12014	1.2711	0.238589	1	0.8056	1	RPS6KA4; MED15; PPP1CA; BAD; AXIN1; HSPB1; TRAF2; E2F1; FKBP8; KRT19; DYNLRB1; PKN1;
ptr01100:DNA Repair	12	324	2.12014	1.25933	0.248149	1	0.8345	1	RPS6KA4; MED15; PPP1CA; BAD; AXIN1; HSPB1; TRAF2; E2F1; FKBP8; KRT19; DYNLRB1; PKN1;
ptr01100:APC/C:Cdh1 mediated degradation of Cdc20 and other APC/C:Cdh1 targeted proteins in late mitosis/early G1	11	121	1.94346	3.09116	0.000896597	1	0.0739194	0.278191	CDT1; UBE2C; POLD1; POLD4; FZR1; ANAPC11; PSMA7; PSMC3; PSMD4; CKS1B; POLD2;
ptr01100:Activation of APC/C and APC/C:Cdc20 mediated degradation of mitotic proteins	11	140	1.94346	2.67168	0.00289387	1	0.0958241	0.360628	PKMYT1; CDT1; UBE2C; FZR1; ANAPC11; PSMA7; E2F1; MYBL2; PSMC3; PSMD4; CKS1B;
ptr01100:Respiratory electron transport	11	143	1.94346	2.61563	0.00340797	1	0.0958241	0.360628	BAD; IRAK1; RELA; HRAS; MAP2K2; ARHGDIA; AP2A1; RPS6KB2; AATF; MLST8; AP2S1;
ptr01100:Regulation of APC/C activators between G1/S and early anaphase	11	158	1.94346	2.36733	0.00717647	1	0.116132	0.437055	RANGAP1; UBE2C; CEP131; MAD1L1; SSNA1; ANAPC11; TUBA4A; PLK1; NUDC; SPC24; CDC20;
ptr01100:Cyclin E associated events during G1/S transition	11	219	1.94346	1.70796	0.0599153	1	0.343432	1	RPS6KA4; HRAS; MAP2K2; AP2A1; RRAS; ARHGAP39; AGRN; GPC1; RHOC; AP2S1; CFL1;
ptr01100:Regulation of mitotic cell cycle	11	299	1.94346	1.251	0.267408	1	0.862741	1	RPS6KA4; BAD; RELA; MAP2K2; LMNB2; HSPB1; TRAF2; E2F1; FKBP8; KRT19; PKN1;
ptr01100:APC/C-mediated degradation of cell cycle proteins	11	307	1.94346	1.2184	0.295582	1	0.928495	1	H2AFX; PPP1R13L; TRIM28; BBC3; TK1; XRCC3; GPX1; E2F1; PLK1; MYBL2; SMARCA4;
ptr01100:Assembly of the pre-replicative complex	10	99	1.76678	3.43487	0.000670795	1	0.0699304	0.263179	PKMYT1; UBE2C; TUBGCP2; CEP131; FZR1; SSNA1; ANAPC11; TUBA4A; E2F1; PLK1;
ptr01100:Regulation of DNA replication	10	104	1.76678	3.26975	0.000986333	1	0.0739194	0.278191	EXOSC4; UBE2C; EXOSC5; HSPB1; EXOSC7; FZR1; ANAPC11; PSMA7; PSMC3; PSMD4;
ptr01100:Cyclin A:Cdk2-associated events at S phase entry	10	109	1.76678	3.11977	0.00141427	1	0.08425	0.31707	CDT1; UBE2C; POLD1; POLD4; FZR1; ANAPC11; PSMA7; PSMC3; PSMD4; POLD2;
ptr01100:Respiratory electron transport, ATP synthesis by chemiosmotic coupling, and heat production by uncoupling proteins.	10	117	1.76678	2.90647	0.00240296	1	0.0891367	0.335461	PKMYT1; CDT1; UBE2C; FZR1; ANAPC11; PSMA7; E2F1; PSMC3; PSMD4; CKS1B;
ptr01100:DNA Replication Pre-Initiation	10	118	1.76678	2.88185	0.00255814	1	0.0891367	0.335461	NDUFS8; CYC1; NDUFV1; BSG; NDUFB7; NDUFS6; NDUFB9; MDH2; COX5B; COX8A;
ptr01100:M/G1 Transition	10	185	1.76678	1.83821	0.0475001	1	0.304467	1	SNRPA; CPSF1; NELFB; POLR2H; NELFA; RNPS1; PTBP1; SF3A2; POLR2I; TAF10;
ptr01100:Mitotic Prometaphase	10	234	1.76678	1.4533	0.153864	1	0.64322	1	RPS6KA4; BAD; IRAK1; RELA; HSPB1; TRAF2; E2F1; FKBP8; KRT19; PKN1;
ptr01100:p63 transcription factor network	9	96	1.59011	3.18833	0.00208033	1	0.088974	0.334848	PKMYT1; UBE2C; TUBGCP2; CEP131; FZR1; SSNA1; ANAPC11; TUBA4A; PLK1;
ptr01100:Cell Cycle Checkpoints	9	98	1.59011	3.12327	0.00239813	1	0.0891367	0.335461	HGS; EPN1; BAD; HRAS; MAP2K2; AP2A1; RPS6KB2; MLST8; AP2S1;
ptr01100:Metabolism of nucleotides	9	103	1.59011	2.97167	0.00336273	1	0.0958241	0.360628	NELFB; RANGAP1; POLR2H; HMGA1; NELFA; POLR2I; PPIA; TAF10; BANF1;
ptr01100:APC/C:Cdc20 mediated degradation of Securin	9	106	1.59011	2.88758	0.00407351	1	0.105491	0.397009	H2AFX; POLR2H; MPG; POLD1; NTHL1; XAB2; POLD4; POLR2I; POLD2;
ptr01100:SCF(Skp2)-mediated degradation of p27/p21	9	178	1.59011	1.71963	0.0807897	1	0.426447	1	CPSF1; NELFB; POLR2H; NELFA; RNPS1; POLR2I; TAF10; GTF3C5; SNAPC2;
ptr01100:Cdc20:Phospho-APC/C mediated degradation of Cyclin A	9	178	1.59011	1.71963	0.0807897	1	0.426447	1	GIPC1; BAD; IRAK1; RELA; HRAS; RTN4R; ARHGDIA; E2F1; RHOC;
ptr01100:SCF-beta-TrCP mediated degradation of Emi1	9	190	1.59011	1.61103	0.109387	1	0.517519	1	HGS; BAD; BCAR1; RELA; HRAS; PLCB3; MLST8; RHOC; CFL1;
ptr01100:APC/C:Cdc20 mediated degradation of mitotic proteins	9	205	1.59011	1.49316	0.152065	1	0.637299	1	RUVBL2; BCAR1; ARHGDIA; ARPC1B; MAP3K11; BAIAP2; PKN1; CYBA; CFL1;
ptr01100:Destabilization of mRNA by AUF1 (hnRNP D0)	9	205	1.59011	1.49316	0.152065	1	0.637299	1	RUVBL2; BCAR1; ARHGDIA; ARPC1B; MAP3K11; BAIAP2; PKN1; CYBA; CFL1;
ptr01100:CDT1 association with the CDC6:ORC:origin complex	9	205	1.59011	1.49316	0.152065	1	0.637299	1	RUVBL2; BCAR1; ARHGDIA; ARPC1B; MAP3K11; BAIAP2; PKN1; CYBA; CFL1;
ptr01100:Signaling by Wnt	9	205	1.59011	1.49316	0.152065	1	0.637299	1	RUVBL2; BCAR1; ARHGDIA; ARPC1B; MAP3K11; BAIAP2; PKN1; CYBA; CFL1;
ptr01100:Degradation of beta-catenin by the destruction complex	9	226	1.59011	1.35442	0.223272	1	0.78902	1	RPS6KA4; PPP1CA; BAD; HSPB1; TRAF2; E2F1; FKBP8; KRT19; PKN1;
ptr01100:Switching of origins to a post-replicative state	9	250	1.59011	1.2244	0.316743	1	0.964043	1	H2AFX; PPP1R13L; TRIM28; BBC3; XRCC3; GPX1; E2F1; PLK1; SMARCA4;
ptr01100:Orc1 removal from chromatin	9	275	1.59011	1.11309	0.42084	1	1	1	DVL1; HGS; RUVBL2; PAK4; AXIN1; HRAS; JUP; SMARCA4; STX4;
ptr01100:Removal of licensing factors from origins	9	275	1.59011	1.11309	0.42084	1	1	1	DVL1; HGS; RUVBL2; PAK4; AXIN1; HRAS; JUP; SMARCA4; STX4;
ptr01100:Metabolism of carbohydrates	9	280	1.59011	1.09322	0.441806	1	1	1	DVL1; HGS; RUVBL2; PAK4; AXIN1; HRAS; JUP; SMARCA4; STX4;
ptr01100:LPA receptor mediated events	8	69	1.41343	3.94345	0.000924921	1	0.0739194	0.278191	UBE2C; FZR1; ANAPC11; PSMA7; PLK1; PSMC3; PSMD4; CDC20;
ptr01100:RNA Polymerase II Transcription	8	72	1.41343	3.77916	0.00122613	1	0.0785628	0.295667	UBE2C; FZR1; ANAPC11; PSMA7; PLK1; PSMC3; PSMD4; CDC20;
ptr01100:PLK1 signaling events	8	76	1.41343	3.58028	0.00174391	1	0.0855543	0.321979	NDUFS8; CYC1; NDUFV1; NDUFB7; NDUFS6; NDUFB9; COX5B; COX8A;
ptr01100:NGF signalling via TRKA from the plasma membrane	8	78	1.41343	3.48849	0.00206059	1	0.088974	0.334848	UBE2C; FZR1; ANAPC11; PSMA7; PLK1; PSMC3; PSMD4; CDC20;
ptr01100:mRNA Splicing - Major Pathway	8	78	1.41343	3.48849	0.00206059	1	0.088974	0.334848	PKMYT1; UBE2C; FZR1; ANAPC11; PSMA7; PSMC3; PSMD4; CKS1B;
ptr01100:mRNA Splicing	8	81	1.41343	3.3593	0.00261853	1	0.0891367	0.335461	UBE2C; FZR1; ANAPC11; PSMA7; PLK1; PSMC3; PSMD4; CDC20;
ptr01100:Polo-like kinase signaling events in the cell cycle	8	81	1.41343	3.3593	0.00261853	1	0.0891367	0.335461	UBE2C; FZR1; ANAPC11; PSMA7; PLK1; PSMC3; PSMD4; CDC20;
ptr01100:Transcription-coupled NER (TC-NER)	8	83	1.41343	3.27837	0.00305162	1	0.0958241	0.360628	CDT1; UBE2C; FZR1; ANAPC11; PSMA7; E2F1; PSMC3; PSMD4;
ptr01100:Telomere Maintenance	8	88	1.41343	3.09212	0.0043791	1	0.10902	0.41029	CDT1; UBE2C; FZR1; ANAPC11; PSMA7; E2F1; PSMC3; PSMD4;
ptr01100:Nucleotide Excision Repair	8	90	1.41343	3.02341	0.0050195	1	0.114692	0.431637	CDT1; UBE2C; FZR1; ANAPC11; PSMA7; PSMC3; PSMD4; CKS1B;
ptr01100:Autodegradation of Cdh1 by Cdh1:APC/C	8	91	1.41343	2.99019	0.00536541	1	0.116132	0.437055	NDUFS8; CYC1; NDUFV1; NDUFB7; NDUFS6; NDUFB9; COX5B; COX8A;
ptr01100:Ubiquitin-dependent degradation of Cyclin D	8	98	1.41343	2.77663	0.00832058	1	0.116132	0.437055	CDT1; UBE2C; FZR1; ANAPC11; PSMA7; E2F1; PSMC3; PSMD4;
ptr01100:Ubiquitin-dependent degradation of Cyclin D1	8	98	1.41343	2.77663	0.00832058	1	0.116132	0.437055	CDT1; UBE2C; FZR1; ANAPC11; PSMA7; E2F1; PSMC3; PSMD4;
ptr01100:CDK-mediated phosphorylation and removal of Cdc6	8	99	1.41343	2.74858	0.00882605	1	0.116132	0.437055	RANGAP1; UBE2C; MAD1L1; ANAPC11; PLK1; NUDC; SPC24; CDC20;
ptr01100:Regulation of activated PAK-2p34 by proteasome mediated degradation	8	105	1.41343	2.59154	0.0123539	1	0.137253	0.516542	ADRM1; DVL1; NOC2L; AXIN1; BBC3; ITGB4; PLK1; TRAF4;
ptr01100:Vpu mediated degradation of CD4	8	118	1.41343	2.30605	0.0233807	1	0.192113	0.723007	UBE2C; FZR1; MAD1L1; ANAPC11; PSMA7; PSMC3; PSMD4; CDC20;
ptr01100:Cross-presentation of soluble exogenous antigens (endosomes)	8	138	1.41343	1.97187	0.0515269	1	0.319505	1	PLEC; EPN1; BCAR1; TNK2; HRAS; MAP2K2; AP2A1; PTK6;
ptr01100:Autodegradation of the E3 ubiquitin ligase COP1	8	149	1.41343	1.8263	0.0736692	1	0.404211	1	HMGA1; RUVBL2; AXIN1; TK1; ITGB4; GAPDH; TAF10; NME2;
ptr01100:Vif-mediated degradation of APOBEC3G	8	183	1.41343	1.48701	0.172848	1	0.686454	1	PRKCSH; IRAK1; RELA; MAP2K2; TRAF2; NFKBIB; IRF3; SIGIRR;
ptr01100:Chromosome Maintenance	8	189	1.41343	1.4398	0.194704	1	0.726547	1	RPS6KA4; BAD; HSPB1; TRAF2; E2F1; FKBP8; KRT19; PKN1;
ptr01100:Stabilization of p53	8	231	1.41343	1.17803	0.370702	1	1	1	DVL1; HGS; RUVBL2; PAK4; AXIN1; HRAS; JUP; SMARCA4;
ptr01100:Ubiquitin Mediated Degradation of Phosphorylated Cdc25A	8	237	1.41343	1.14821	0.397542	1	1	1	UBE2C; RELA; FZR1; ANAPC11; PSMA7; PSMC3; PSMD4; MLST8;
ptr01100:Antigen processing: Ubiquitination & Proteasome degradation	8	251	1.41343	1.08417	0.46006	1	1	1	DVL1; HGS; RUVBL2; PAK4; AXIN1; HRAS; JUP; SMARCA4;
ptr01100:Recruitment of mitotic centrosome proteins and complexes	8	257	1.41343	1.05886	0.486524	1	1	1	PPP1CA; DGAT1; ACOT8; MVD; SLC25A1; EBP; ECI1; AGPAT2;
ptr01100:Centrosome maturation	7	58	1.23675	4.10554	0.00151076	1	0.085249	0.32083	GUK1; APRT; NT5C; DGUOK; TK1; DTYMK; GPX1;
ptr01100:p53-Independent G1/S DNA damage checkpoint	7	66	1.23675	3.60798	0.00319943	1	0.0958241	0.360628	UBE2C; FZR1; ANAPC11; PSMA7; PSMC3; PSMD4; CDC20;
ptr01100:p53-Independent DNA Damage Response	7	67	1.23675	3.55413	0.0034841	1	0.0958241	0.360628	UBE2C; FZR1; ANAPC11; PSMA7; PSMC3; PSMD4; CKS1B;
ptr01100:Regulation of ornithine decarboxylase (ODC)	7	69	1.23675	3.45113	0.00411086	1	0.105491	0.397009	UBE2C; FZR1; ANAPC11; PSMA7; PSMC3; PSMD4; CDC20;
ptr01100:p53-Dependent G1 DNA Damage Response	7	70	1.23675	3.40184	0.00445453	1	0.109267	0.411219	UBE2C; FZR1; ANAPC11; PSMA7; PSMC3; PSMD4; CDC20;
ptr01100:p53-Dependent G1/S DNA damage checkpoint	7	71	1.23675	3.35393	0.00481944	1	0.114692	0.431637	UBE2C; FZR1; ANAPC11; PSMA7; PSMC3; PSMD4; CDC20;
ptr01100:Activated TLR4 signalling	7	71	1.23675	3.35393	0.00481944	1	0.114692	0.431637	UBE2C; HSPB1; FZR1; ANAPC11; PSMA7; PSMC3; PSMD4;
ptr01100:Downstream signal transduction	7	74	1.23675	3.21798	0.00604976	1	0.116132	0.437055	CDT1; UBE2C; FZR1; ANAPC11; PSMA7; PSMC3; PSMD4;
ptr01100:Regulation of Apoptosis	7	75	1.23675	3.17508	0.00650775	1	0.116132	0.437055	UBE2C; AXIN1; FZR1; ANAPC11; PSMA7; PSMC3; PSMD4;
ptr01100:G1/S DNA Damage Checkpoints	7	75	1.23675	3.17508	0.00650775	1	0.116132	0.437055	UBE2C; AXIN1; FZR1; ANAPC11; PSMA7; PSMC3; PSMD4;
ptr01100:Toll Like Receptor 4 (TLR4) Cascade	7	83	1.23675	2.86908	0.0111505	1	0.132177	0.497442	CDT1; UBE2C; FZR1; ANAPC11; PSMA7; PSMC3; PSMD4;
ptr01100:Signaling by PDGF	7	83	1.23675	2.86908	0.0111505	1	0.132177	0.497442	CDT1; UBE2C; FZR1; ANAPC11; PSMA7; PSMC3; PSMD4;
ptr01100:ER-Phagosome pathway	7	85	1.23675	2.80158	0.0126125	1	0.137253	0.516542	CDT1; UBE2C; FZR1; ANAPC11; PSMA7; PSMC3; PSMD4;
ptr01100:Validated targets of C-MYC transcriptional activation	7	92	1.23675	2.58844	0.0188171	1	0.171215	0.644357	PGLS; SLC25A1; TALDO1; MDH2; SLC25A10; PHKG2; TKT;
ptr01100:Antigen processing-Cross presentation	7	100	1.23675	2.38139	0.0282189	1	0.216908	0.816321	BCAR1; RELA; HRAS; TRIP6; GNA15; PLCB3; SLC9A3R2;
ptr01100:Toll Receptor Cascades	7	101	1.23675	2.35781	0.0295826	1	0.219306	0.825345	CPSF1; NELFB; POLR2H; NELFA; RNPS1; POLR2I; TAF10;
ptr01100:Removal of DNA patch containing abasic residue	7	104	1.23675	2.2898	0.0339385	1	0.241921	0.910454	AURKAIP1; RELA; FZR1; PLK1; NUDC; SPC24; CDC20;
ptr01100:Resolution of AP sites via the multiple-nucleotide patch replacement pathway	7	107	1.23675	2.22561	0.0387011	1	0.267837	1	BAD; HRAS; MAP2K2; AP2A1; RPS6KB2; MLST8; AP2S1;
ptr01100:Base Excision Repair	7	107	1.23675	2.22561	0.0387011	1	0.267837	1	SNRPA; CPSF1; POLR2H; RNPS1; PTBP1; SF3A2; POLR2I;
ptr01100:Resolution of Abasic Sites (AP sites)	7	107	1.23675	2.22561	0.0387011	1	0.267837	1	SNRPA; CPSF1; POLR2H; RNPS1; PTBP1; SF3A2; POLR2I;
ptr01100:Phosphorylation of Emi1	7	109	1.23675	2.18478	0.0421078	1	0.279824	1	AURKAIP1; RELA; FZR1; PLK1; NUDC; SPC24; CDC20;
ptr01100:Extension of Telomeres	7	114	1.23675	2.08896	0.051455	1	0.319505	1	ALG3; GPAA1; PRKCSH; DOHH; DPM2; MGAT4B; RPN1;
ptr01100:Response to elevated platelet cytosolic Ca2+	7	138	1.23675	1.72569	0.113327	1	0.52218	1	BCAR1; TUBA4A; GNA15; PPIA; STX4; AP2S1; CFL1;
ptr01100:p75 NTR receptor-mediated signalling	7	138	1.23675	1.72569	0.113327	1	0.52218	1	SNRPA; CPSF1; POLR2H; RNPS1; PTBP1; SF3A2; POLR2I;
ptr01100:Validated transcriptional targets of TAp63 isoforms	7	157	1.23675	1.51686	0.181216	1	0.710524	1	SNRPA; CPSF1; POLR2H; RNPS1; PTBP1; SF3A2; POLR2I;
ptr01100:RNA Polymerase II Pre-transcription Events	7	188	1.23675	1.26675	0.317715	1	0.964043	1	GNB2; COMT; HRAS; RRAS; KCNN4; PLCB3; AP2S1;
ptr01100:Transcription of the HIV genome	6	44	1.06007	4.63958	0.00172719	1	0.0855543	0.321979	POLR2H; POLD1; XAB2; POLD4; POLR2I; POLD2;
ptr01100:MyD88:Mal cascade initiated on plasma membrane	6	49	1.06007	4.16625	0.00302356	1	0.0958241	0.360628	RUVBL2; POLD1; NHP2; POLD4; ACD; POLD2;
ptr01100:Toll Like Receptor TLR1:TLR2 Cascade	6	49	1.06007	4.16625	0.00302356	1	0.0958241	0.360628	POLR2H; POLD1; XAB2; POLD4; POLR2I; POLD2;
ptr01100:Toll Like Receptor TLR6:TLR2 Cascade	6	60	1.06007	3.40256	0.0082581	1	0.116132	0.437055	UBE2C; FZR1; ANAPC11; PSMA7; PSMC3; PSMD4;
ptr01100:Toll Like Receptor 2 (TLR2) Cascade	6	66	1.06007	3.09329	0.0129412	1	0.137253	0.516542	UBE2C; FZR1; ANAPC11; PSMA7; PSMC3; PSMD4;
ptr01100:Downstream signaling of activated FGFR	6	66	1.06007	3.09329	0.0129412	1	0.137253	0.516542	UBE2C; FZR1; ANAPC11; PSMA7; PSMC3; PSMD4;
ptr01100:Signaling by SCF-KIT	6	66	1.06007	3.09329	0.0129412	1	0.137253	0.516542	UBE2C; FZR1; ANAPC11; PSMA7; PSMC3; PSMD4;
ptr01100:Conversion from APC/C:Cdc20 to APC/C:Cdh1 in late anaphase	6	66	1.06007	3.09329	0.0129412	1	0.137253	0.516542	UBE2C; FZR1; ANAPC11; PSMA7; PSMC3; PSMD4;
ptr01100:Mitotic Telophase /Cytokinesis	6	67	1.06007	3.04712	0.0138714	1	0.143074	0.538452	UBE2C; FZR1; ANAPC11; PSMA7; PSMC3; PSMD4;
ptr01100:Phosphorylation of the APC/C	6	67	1.06007	3.04712	0.0138714	1	0.143074	0.538452	UBE2C; FZR1; ANAPC11; PSMA7; PSMC3; PSMD4;
ptr01100:Polo-like kinase mediated events	6	68	1.06007	3.00232	0.0148472	1	0.150502	0.566404	UBE2C; FZR1; ANAPC11; PSMA7; PSMC3; PSMD4;
ptr01100:Mitotic Spindle Checkpoint	6	69	1.06007	2.95882	0.0158698	1	0.15571	0.586006	UBE2C; FZR1; ANAPC11; PSMA7; PSMC3; PSMD4;
ptr01100:Arf1 pathway	6	69	1.06007	2.95882	0.0158698	1	0.15571	0.586006	RUVBL2; POLD1; NHP2; POLD4; ACD; POLD2;
ptr01100:Homologous Recombination Repair	6	69	1.06007	2.95882	0.0158698	1	0.15571	0.586006	UBE2C; FZR1; ANAPC11; PSMA7; PSMC3; PSMD4;
ptr01100:Homologous recombination repair of replication-independent double-strand breaks	6	69	1.06007	2.95882	0.0158698	1	0.15571	0.586006	UBE2C; FZR1; ANAPC11; PSMA7; PSMC3; PSMD4;
ptr01100:Abortive elongation of HIV-1 transcript in the absence of Tat	6	69	1.06007	2.95882	0.0158698	1	0.15571	0.586006	UBE2C; FZR1; ANAPC11; PSMA7; PSMC3; PSMD4;
ptr01100:Purine metabolism	6	70	1.06007	2.91655	0.0169399	1	0.156977	0.590773	TUBGCP2; CEP131; FZR1; SSNA1; TUBA4A; PLK1;
ptr01100:EGFR downregulation	6	70	1.06007	2.91655	0.0169399	1	0.156977	0.590773	TUBGCP2; CEP131; FZR1; SSNA1; TUBA4A; PLK1;
ptr01100:Double-Strand Break Repair	6	70	1.06007	2.91655	0.0169399	1	0.156977	0.590773	UBE2C; FZR1; ANAPC11; PSMA7; PSMC3; PSMD4;
ptr01100:Pausing and recovery of Tat-mediated HIV-1 elongation	6	70	1.06007	2.91655	0.0169399	1	0.156977	0.590773	UBE2C; FZR1; ANAPC11; PSMA7; PSMC3; PSMD4;
ptr01100:Tat-mediated HIV-1 elongation arrest and recovery	6	70	1.06007	2.91655	0.0169399	1	0.156977	0.590773	UBE2C; FZR1; ANAPC11; PSMA7; PSMC3; PSMD4;
ptr01100:Elongation arrest and recovery	6	72	1.06007	2.83555	0.0192271	1	0.171502	0.645438	UBE2C; FZR1; ANAPC11; PSMA7; PSMC3; PSMD4;
ptr01100:Pausing and recovery of HIV-1 elongation	6	72	1.06007	2.83555	0.0192271	1	0.171502	0.645438	UBE2C; FZR1; ANAPC11; PSMA7; PSMC3; PSMD4;
ptr01100:HIV-1 elongation arrest and recovery	6	72	1.06007	2.83555	0.0192271	1	0.171502	0.645438	IRAK1; RELA; MAP2K2; NFKBIB; IRF3; SIGIRR;
ptr01100:Pausing and recovery of elongation	6	75	1.06007	2.72214	0.0230388	1	0.190241	0.71596	BAD; BCAR1; HRAS; MAP2K2; RPS6KB2; MLST8;
ptr01100:Formation of the HIV-1 Early Elongation Complex	6	75	1.06007	2.72214	0.0230388	1	0.190241	0.71596	UBE2C; FZR1; ANAPC11; PSMA7; PSMC3; PSMD4;
ptr01100:Formation of the Early Elongation Complex	6	76	1.06007	2.68633	0.0244143	1	0.198649	0.747603	UBE2C; FZR1; ANAPC11; PSMA7; PSMC3; PSMD4;
ptr01100:Signal transduction by L1	6	76	1.06007	2.68633	0.0244143	1	0.198649	0.747603	IRAK1; RELA; MAP2K2; NFKBIB; IRF3; SIGIRR;
ptr01100:Glucose metabolism	6	78	1.06007	2.61746	0.0273275	1	0.212011	0.79789	BAD; BCAR1; HRAS; MAP2K2; RPS6KB2; MLST8;
ptr01100:Phase II conjugation	6	80	1.06007	2.55203	0.0304618	1	0.224825	0.846114	UBE2C; FZR1; ANAPC11; PSMA7; PSMC3; PSMD4;
ptr01100:HIV-1 Transcription Elongation	6	81	1.06007	2.52053	0.0321136	1	0.230885	0.868924	HMGA1; RUVBL2; TK1; GAPDH; TAF10; NME2;
ptr01100:Tat-mediated elongation of the HIV-1 transcript	6	86	1.06007	2.374	0.0412405	1	0.275157	1	UBE2C; FZR1; ANAPC11; PSMA7; PSMC3; PSMD4;
ptr01100:Formation of HIV-1 elongation complex containing HIV-1 Tat	6	90	1.06007	2.2685	0.0496112	1	0.309931	1	IRAK1; RELA; MAP2K2; NFKBIB; IRF3; SIGIRR;
ptr01100:Formation of HIV-1 elongation complex in the absence of HIV-1 Tat	6	92	1.06007	2.21919	0.0541602	1	0.330162	1	NELFB; RANGAP1; POLR2H; NELFA; POLR2I; TAF10;
ptr01100:Formation of RNA Pol II elongation complex	6	101	1.06007	2.02146	0.0776625	1	0.420588	1	UBE2C; FZR1; ANAPC11; PSMA7; PSMC3; PSMD4;
ptr01100:RNA Polymerase II Transcription Elongation	6	121	1.06007	1.68736	0.14704	1	0.624079	1	GNB2; COMT; HRAS; RRAS; PLCB3; AP2S1;
ptr01100:Deadenylation-dependent mRNA decay	6	164	1.06007	1.24497	0.353097	1	1	1	RPS6KA4; BAD; HSPB1; E2F1; FKBP8; KRT19;
ptr01100:Metabolism of vitamins and cofactors	6	188	1.06007	1.08605	0.478592	1	1	1	UBE2C; FZR1; ANAPC11; PSMA7; PSMC3; PSMD4;
ptr01100:Metabolism of water-soluble vitamins and cofactors	6	189	1.06007	1.0803	0.483712	1	1	1	PPP1R13L; TRIM28; BBC3; GPX1; E2F1; SMARCA4;
ptr01100:APOBEC3G mediated resistance to HIV-1 infection	6	193	1.06007	1.05791	0.504028	1	1	1	TNIP2; IRAK1; RELA; HRAS; MAP2K2; IRF3;
ptr01100:Resolution of D-loop structures through Holliday junction intermediates	6	209	1.06007	0.976929	0.582011	1	1	1	DVL1; GIPC1; RUVBL2; AXIN1; MDK; SMARCA4;
ptr01100:Resolution of D-loop structures	6	800	1.06007	0.255232	0.999997	1	1	1	PPP1CA; GNA15; PLCB3; NMB; DRD4; RHOC;
ptr01100:Pentose phosphate pathway (hexose monophosphate shunt)	5	17	0.883392	10.0067	0.000100105	0.166976	0.0309406	0.116443	MPG; POLD1; NTHL1; POLD4; POLD2;
ptr01100:Integration of provirus	5	17	0.883392	10.0067	0.000100105	0.166976	0.0309406	0.116443	MPG; POLD1; NTHL1; POLD4; POLD2;
ptr01100:Type I hemidesmosome assembly	5	19	0.883392	8.95387	0.00017915	0.298822	0.0332024	0.124955	MPG; POLD1; NTHL1; POLD4; POLD2;
ptr01100:Basigin interactions	5	19	0.883392	8.95387	0.00017915	0.298822	0.0332024	0.124955	MPG; POLD1; NTHL1; POLD4; POLD2;
ptr01100:Removal of the Flap Intermediate from the C-strand	5	20	0.883392	8.5064	0.000233114	0.388834	0.0337299	0.12694	UBE2C; FZR1; ANAPC11; PLK1; CDC20;
ptr01100:pentose phosphate pathway	5	28	0.883392	6.07687	0.0012167	1	0.0785628	0.295667	RUVBL2; POLD1; NHP2; POLD4; POLD2;
ptr01100:Early Phase of HIV Life Cycle	5	39	0.883392	4.36332	0.00546702	1	0.116132	0.437055	TUBA4A; PPIA; STX4; AP2S1; CFL1;
ptr01100:Processive synthesis on the C-strand of the telomere	5	39	0.883392	4.36332	0.00546702	1	0.116132	0.437055	BAD; IRAK1; RELA; ARHGDIA; AATF;
ptr01100:mRNA Decay by 3' to 5' Exoribonuclease	5	54	0.883392	3.15151	0.0209962	1	0.180422	0.679009	NOC2L; BBC3; ITGB4; PLK1; TRAF4;
ptr01100:TRAF6 mediated NF-kB activation	5	58	0.883392	2.9342	0.0276746	1	0.213709	0.804282	NELFB; POLR2H; NELFA; POLR2I; TAF10;
ptr01100:Polymerase switching on the C-strand of the telomere	5	60	0.883392	2.83641	0.0314658	1	0.230011	0.865634	NELFB; POLR2H; NELFA; POLR2I; TAF10;
ptr01100:Removal of the Flap Intermediate	5	62	0.883392	2.74493	0.0355669	1	0.249267	0.938101	IRAK1; RELA; MAP2K2; NFKBIB; SIGIRR;
ptr01100:Polymerase switching	5	64	0.883392	2.65917	0.0399828	1	0.267837	1	IRAK1; RELA; MAP2K2; NFKBIB; SIGIRR;
ptr01100:Leading Strand Synthesis	5	64	0.883392	2.65917	0.0399828	1	0.267837	1	IRAK1; RELA; MAP2K2; NFKBIB; SIGIRR;
ptr01100:guanosine nucleotides de novo biosynthesis	5	65	0.883392	2.61826	0.0423101	1	0.280053	1	IRAK1; RELA; MAP2K2; NFKBIB; SIGIRR;
ptr01100:pyrimidine deoxyribonucleotides de novo biosynthesis	5	66	0.883392	2.5786	0.0447174	1	0.292504	1	BAD; HRAS; MAP2K2; RPS6KB2; MLST8;
ptr01100:Processive synthesis on the lagging strand	5	66	0.883392	2.5786	0.0447174	1	0.292504	1	BAD; HRAS; MAP2K2; RPS6KB2; MLST8;
ptr01100:Repair synthesis of patch ~27-30 bases long by DNA polymerase	5	77	0.883392	2.21027	0.0765054	1	0.418397	1	ALG3; PRKCSH; DPM2; MGAT4B; RPN1;
ptr01100:Repair synthesis for gap-filling by DNA polymerase in TC-NER	5	78	0.883392	2.18194	0.0798737	1	0.424297	1	RELA; CDC37; STUB1; PRMT1; COX5B;
ptr01100:Glutathione conjugation	5	84	0.883392	2.02611	0.1017	1	0.500401	1	VPS28; CHMP4B; HGS; ARFGAP1; STX4;
ptr01100:salvage pathways of pyrimidine ribonucleotides	5	89	0.883392	1.91229	0.121918	1	0.554111	1	GNB2; HRAS; RRAS; PLCB3; AP2S1;
ptr01100:Gap-filling DNA repair synthesis and ligation in TC-NER	5	92	0.883392	1.84994	0.134879	1	0.595527	1	TNIP2; IRAK1; RELA; HRAS; MAP2K2;
ptr01100:Gap-filling DNA repair synthesis and ligation in GG-NER	5	95	0.883392	1.79153	0.148424	1	0.628353	1	BAD; HRAS; MAP2K2; RPS6KB2; MLST8;
ptr01100:Destabilization of mRNA by Tristetraprolin (TTP)	5	130	0.883392	1.30923	0.336613	1	0.997001	1	BAD; RELA; MAP2K2; LMNB2; TRAF2;
ptr01100:Activation of BH3-only proteins	5	216	0.883392	0.787987	0.765674	1	1	1	RPL8; ARFGAP1; RPL28; YIF1A; RPN1;
ptr01100:Inactivation of APC/C via direct inhibition of the APC/C complex	4	16	0.706714	8.50959	0.00101927	1	0.0739194	0.278191	UBE2C; FZR1; ANAPC11; CDC20;
ptr01100:Inhibition of the proteolytic activity of APC/C required for the onset of anaphase by mitotic spindle checkpoint components	4	18	0.706714	7.5646	0.00163547	1	0.085249	0.32083	UBE2C; ANAPC11; PLK1; NUDC;
ptr01100:Destabilization of mRNA by KSRP	4	18	0.706714	7.5646	0.00163547	1	0.085249	0.32083	UBE2C; FZR1; ANAPC11; PLK1;
ptr01100:Lagging Strand Synthesis	4	18	0.706714	7.5646	0.00163547	1	0.085249	0.32083	PKMYT1; UBE2C; ANAPC11; PLK1;
ptr01100:Destabilization of mRNA by Butyrate Response Factor 1 (BRF1)	4	19	0.706714	7.16667	0.00202382	1	0.088974	0.334848	UBE2C; MAD1L1; ANAPC11; CDC20;
ptr01100:Gluconeogenesis	4	20	0.706714	6.80852	0.0024715	1	0.0891367	0.335461	ARFGAP1; CLTB; AP2A1; KDELR1;
ptr01100:PIP3 activates AKT signaling	4	22	0.706714	6.18984	0.00356181	1	0.0958241	0.360628	H2AFX; POLD1; POLD4; POLD2;
ptr01100:Mitotic Metaphase/Anaphase Transition	4	22	0.706714	6.18984	0.00356181	1	0.0958241	0.360628	H2AFX; POLD1; POLD4; POLD2;
ptr01100:APC/C:Cdc20 mediated degradation of Cyclin B	4	23	0.706714	5.92084	0.00421265	1	0.106465	0.400675	NELFB; POLR2H; NELFA; POLR2I;
ptr01100:Telomere C-strand (Lagging Strand) Synthesis	4	24	0.706714	5.67424	0.00493921	1	0.114692	0.431637	APRT; NT5C; DGUOK; GPX1;
ptr01100:APC-Cdc20 mediated degradation of Nek2A	4	27	0.706714	5.044	0.0076102	1	0.116132	0.437055	HGS; EPN1; AP2A1; AP2S1;
ptr01100:PI-3K cascade	4	27	0.706714	5.044	0.0076102	1	0.116132	0.437055	H2AFX; POLD1; POLD4; POLD2;
ptr01100:Platelet degranulation	4	30	0.706714	4.53977	0.0110887	1	0.132177	0.497442	NELFB; POLR2H; NELFA; POLR2I;
ptr01100:Dual incision reaction in TC-NER	4	30	0.706714	4.53977	0.0110887	1	0.132177	0.497442	NELFB; POLR2H; NELFA; POLR2I;
ptr01100:Formation of transcription-coupled NER (TC-NER) repair complex	4	31	0.706714	4.39337	0.0124416	1	0.137253	0.516542	NELFB; POLR2H; NELFA; POLR2I;
ptr01100:Endosomal Sorting Complex Required For Transport (ESCRT)	4	31	0.706714	4.39337	0.0124416	1	0.137253	0.516542	NELFB; POLR2H; NELFA; POLR2I;
ptr01100:Triglyceride Biosynthesis	4	31	0.706714	4.39337	0.0124416	1	0.137253	0.516542	NELFB; POLR2H; NELFA; POLR2I;
ptr01100:Insulin effects increased synthesis of Xylulose-5-Phosphate	4	31	0.706714	4.39337	0.0124416	1	0.137253	0.516542	NELFB; POLR2H; NELFA; POLR2I;
ptr01100:Autointegration results in viral DNA circles	4	32	0.706714	4.25612	0.0138957	1	0.143074	0.538452	NELFB; POLR2H; NELFA; POLR2I;
ptr01100:Activation of PUMA and translocation to mitochondria	4	32	0.706714	4.25612	0.0138957	1	0.143074	0.538452	NELFB; POLR2H; NELFA; POLR2I;
ptr01100:Telomere Extension By Telomerase	4	35	0.706714	3.89142	0.018887	1	0.171215	0.644357	RPS6KA4; MAP2K2; AP2A1; AP2S1;
ptr01100:Glutathione synthesis and recycling	4	36	0.706714	3.78335	0.020767	1	0.180422	0.679009	SLC25A1; MDH2; SLC25A10; PHKG2;
ptr01100:pentose phosphate pathway (non-oxidative branch)	4	39	0.706714	3.4924	0.0270772	1	0.211557	0.79618	OPLAH; COMT; GSTP1; GSS;
ptr01100:Nef Mediated CD8 Down-regulation	4	41	0.706714	3.32208	0.0318541	1	0.230011	0.865634	NELFB; POLR2H; NELFA; POLR2I;
ptr01100:MEK activation	4	41	0.706714	3.32208	0.0318541	1	0.230011	0.865634	NELFB; POLR2H; NELFA; POLR2I;
ptr01100:RAF phosphorylates MEK	4	41	0.706714	3.32208	0.0318541	1	0.230011	0.865634	NELFB; POLR2H; NELFA; POLR2I;
ptr01100:2-LTR circle formation	4	42	0.706714	3.243	0.0344159	1	0.242218	0.911574	NELFB; POLR2H; NELFA; POLR2I;
ptr01100:Purine salvage	4	42	0.706714	3.243	0.0344159	1	0.242218	0.911574	NELFB; POLR2H; NELFA; POLR2I;
ptr01100:Inactivation of Cdc42 and Rac	4	42	0.706714	3.243	0.0344159	1	0.242218	0.911574	NELFB; POLR2H; NELFA; POLR2I;
ptr01100:Disinhibition of SNARE formation	4	46	0.706714	2.96106	0.0458277	1	0.298596	1	LSM4; EXOSC4; EXOSC5; EXOSC7;
ptr01100:NRAGE signals death through JNK	4	47	0.706714	2.89807	0.0489718	1	0.307086	1	FPGS; NAPRT; SLC19A1; COASY;
ptr01100:Signaling by Rho GTPases	4	47	0.706714	2.89807	0.0489718	1	0.307086	1	FPGS; NAPRT; SLC19A1; COASY;
ptr01100:Rho GTPase cycle	4	49	0.706714	2.77981	0.0556076	1	0.333609	1	BAD; RELA; MAP2K2; TRAF2;
ptr01100:Base-Excision Repair, AP Site Formation	4	56	0.706714	2.4324	0.0823971	1	0.430841	1	RELA; MAP2K2; NFKBIB; IRF3;
ptr01100:Metabolism of folate and pterines	4	56	0.706714	2.4324	0.0823971	1	0.430841	1	RELA; MAP2K2; NFKBIB; IRF3;
ptr01100:Nef Mediated CD4 Down-regulation	4	58	0.706714	2.34853	0.091031	1	0.461519	1	RELA; MAP2K2; NFKBIB; IRF3;
ptr01100:Displacement of DNA glycosylase by APE1	4	59	0.706714	2.30874	0.0955036	1	0.47982	1	IRAK1; RELA; MAP2K2; NFKBIB;
ptr01100:gamma-glutamyl cycle	4	59	0.706714	2.30874	0.0955036	1	0.47982	1	IRAK1; RELA; MAP2K2; NFKBIB;
ptr01100:glutathione redox reactions I	4	60	0.706714	2.27026	0.100078	1	0.49534	1	IRAK1; RELA; MAP2K2; NFKBIB;
ptr01100:pyrimidine ribonucleotides interconversion	4	60	0.706714	2.27026	0.100078	1	0.49534	1	IRAK1; RELA; MAP2K2; NFKBIB;
ptr01100:Base-free sugar-phosphate removal via the single-nucleotide replacement pathway	4	60	0.706714	2.27026	0.100078	1	0.49534	1	IRAK1; RELA; MAP2K2; NFKBIB;
ptr01100:RAF/MAP kinase cascade	4	61	0.706714	2.23305	0.104752	1	0.509137	1	CEP131; SSNA1; TUBA4A; PLK1;
ptr01100:Retrograde neurotrophin signalling	4	61	0.706714	2.23305	0.104752	1	0.509137	1	CEP131; SSNA1; TUBA4A; PLK1;
ptr01100:Purine catabolism	4	62	0.706714	2.19704	0.109523	1	0.517519	1	CEP131; SSNA1; TUBA4A; PLK1;
ptr01100:TAK1 activates NFkB by phosphorylation and activation of IKKs complex	4	62	0.706714	2.19704	0.109523	1	0.517519	1	CEP131; SSNA1; TUBA4A; PLK1;
ptr01100:pyrimidine ribonucleotides de novo biosynthesis	4	62	0.706714	2.19704	0.109523	1	0.517519	1	IRAK1; RELA; MAP2K2; NFKBIB;
ptr01100:Recruitment of NuMA to mitotic centrosomes	4	65	0.706714	2.09565	0.124402	1	0.563866	1	IRAK1; RELA; MAP2K2; NFKBIB;
ptr01100:Resolution of AP sites via the single-nucleotide replacement pathway	4	67	0.706714	2.03311	0.134771	1	0.595527	1	RELA; TRAF2; NFKBIB; IRF3;
ptr01100:Uncoating of the HIV Virion	4	69	0.706714	1.97418	0.145478	1	0.621477	1	PLEC; CD151; JUP; ITGB4;
ptr01100:Reverse Transcription of HIV RNA	4	72	0.706714	1.89194	0.16213	1	0.659656	1	SLC16A3; HRAS; BSG; PPIA;
ptr01100:Minus-strand DNA synthesis	4	73	0.706714	1.86602	0.167829	1	0.668113	1	TRIM28; TK1; E2F1; MYBL2;
ptr01100:Plus-strand DNA synthesis	4	78	0.706714	1.74642	0.197322	1	0.73062	1	HSF1; RELA; BBC3; PLK1;
ptr01100:adenine and adenosine salvage I	4	79	0.706714	1.72432	0.203402	1	0.744023	1	RPS6KA4; MAP2K2; AP2A1; AP2S1;
ptr01100:L-dopa degradation	4	79	0.706714	1.72432	0.203402	1	0.744023	1	ATP6V0C; HRAS; MAP2K2; MLST8;
	4	83	0.706714	1.64123	0.228242	1	0.797814	1	DGAT1; SLC25A1; ECI1; AGPAT2;
	4	98	0.706714	1.39005	0.326409	1	0.973973	1	RPL8; POLR2H; RPL28; POLR2I;
	4	98	0.706714	1.39005	0.326409	1	0.973973	1	OPLAH; COMT; GSTP1; GSS;
	4	113	0.706714	1.20554	0.426648	1	1	1	RANGAP1; RELA; RFXANK; SIRT7;
	4	115	0.706714	1.18458	0.43981	1	1	1	RELA; HRAS; MAP2K2; E2F1;
	4	117	0.706714	1.16433	0.452883	1	1	1	RPL8; EEF1D; EIF3B; RPL28;
	4	117	0.706714	1.16433	0.452883	1	1	1	PLEC; CD151; JUP; ITGB4;
	4	130	0.706714	1.04791	0.534955	1	1	1	HRAS; MAP2K2; ZMIZ2; PKN1;
	4	134	0.706714	1.01663	0.558962	1	1	1	HRAS; MAP2K2; ITGB4; E2F1;
	4	135	0.706714	1.0091	0.564859	1	1	1	RPL8; POLR2H; RPL28; POLR2I;
	4	138	0.706714	0.987164	0.582285	1	1	1	BBC3; GPX1; E2F1; SMARCA4;
	4	140	0.706714	0.973062	0.593677	1	1	1	RPL8; POLR2H; RPL28; POLR2I;
	4	155	0.706714	0.878901	0.672974	1	1	1	DVL1; RUVBL2; AXIN1; SMARCA4;
	4	182	0.706714	0.748522	0.78713	1	1	1	DVL1; RUVBL2; AXIN1; SMARCA4;
	4	200	0.706714	0.681158	0.843847	1	1	1	DVL1; RUVBL2; AXIN1; SMARCA4;
	4	206	0.706714	0.66132	0.859689	1	1	1	DVL1; RUVBL2; AXIN1; SMARCA4;
	4	378	0.706714	0.36041	0.996172	1	1	1	SLC39A4; ATP6V0C; SLC16A3; SLC4A2;
ptr01100:	3	5	0.530035	20.4119	0.000242661	0.404759	0.0337299	0.12694	HMGA1; PPIA; BANF1;
ptr01100:	3	6	0.530035	17.0156	0.000474695	0.791791	0.0527861	0.198657	POLD1; POLD4; POLD2;
ptr01100:	3	6	0.530035	17.0156	0.000474695	0.791791	0.0527861	0.198657	POLD1; POLD4; POLD2;
ptr01100:	3	6	0.530035	17.0156	0.000474695	0.791791	0.0527861	0.198657	PGLS; TALDO1; TKT;
ptr01100:	3	8	0.530035	12.767	0.0012717	1	0.0785628	0.295667	HMGA1; PPIA; BANF1;
ptr01100:	3	8	0.530035	12.767	0.0012717	1	0.0785628	0.295667	PLEC; CD151; ITGB4;
ptr01100:	3	9	0.530035	11.35	0.00186597	1	0.0889266	0.33467	SLC16A3; BSG; PPIA;
ptr01100:	3	10	0.530035	10.2162	0.00260764	1	0.0891367	0.335461	POLD1; POLD4; POLD2;
ptr01100:	3	10	0.530035	10.2162	0.00260764	1	0.0891367	0.335461	PGLS; TALDO1; TKT;
ptr01100:	3	11	0.530035	9.28826	0.00350758	1	0.0958241	0.360628	HMGA1; PPIA; BANF1;
ptr01100:	3	11	0.530035	9.28826	0.00350758	1	0.0958241	0.360628	POLD1; POLD4; POLD2;
ptr01100:	3	11	0.530035	9.28826	0.00350758	1	0.0958241	0.360628	EXOSC4; EXOSC5; EXOSC7;
ptr01100:	3	13	0.530035	7.8604	0.005819	1	0.116132	0.437055	RELA; TRAF2; NFKBIB;
ptr01100:	3	14	0.530035	7.29934	0.00724577	1	0.116132	0.437055	POLD1; POLD4; POLD2;
ptr01100:	3	14	0.530035	7.29934	0.00724577	1	0.116132	0.437055	POLD1; POLD4; POLD2;
ptr01100:	3	14	0.530035	7.29934	0.00724577	1	0.116132	0.437055	POLD1; POLD4; POLD2;
ptr01100:	3	14	0.530035	7.29934	0.00724577	1	0.116132	0.437055	POLD1; POLD4; POLD2;
ptr01100:	3	14	0.530035	7.29934	0.00724577	1	0.116132	0.437055	GUK1; NME2; NME3;
ptr01100:	3	14	0.530035	7.29934	0.00724577	1	0.116132	0.437055	DTYMK; NME2; NME3;
ptr01100:	3	15	0.530035	6.81304	0.00886158	1	0.116132	0.437055	POLD1; POLD4; POLD2;
ptr01100:	3	15	0.530035	6.81304	0.00886158	1	0.116132	0.437055	POLD1; POLD4; POLD2;
ptr01100:	3	15	0.530035	6.81304	0.00886158	1	0.116132	0.437055	POLD1; POLD4; POLD2;
ptr01100:	3	15	0.530035	6.81304	0.00886158	1	0.116132	0.437055	OPLAH; GSTP1; GSS;
ptr01100:	3	15	0.530035	6.81304	0.00886158	1	0.116132	0.437055	UCKL1; NME2; NME3;
ptr01100:	3	16	0.530035	6.38749	0.0106713	1	0.130881	0.492562	POLD1; POLD4; POLD2;
ptr01100:	3	16	0.530035	6.38749	0.0106713	1	0.130881	0.492562	POLD1; POLD4; POLD2;
ptr01100:	3	17	0.530035	6.01198	0.012679	1	0.137253	0.516542	EXOSC4; EXOSC5; EXOSC7;
ptr01100:	3	17	0.530035	6.01198	0.012679	1	0.137253	0.516542	BAD; BBC3; E2F1;
ptr01100:	3	18	0.530035	5.67817	0.0148877	1	0.150502	0.566404	UBE2C; ANAPC11; CDC20;
ptr01100:	3	18	0.530035	5.67817	0.0148877	1	0.150502	0.566404	UBE2C; ANAPC11; CDC20;
ptr01100:	3	19	0.530035	5.37947	0.0172997	1	0.159425	0.599987	EXOSC4; EXOSC5; EXOSC7;
ptr01100:	3	20	0.530035	5.11063	0.0199165	1	0.174846	0.658022	POLD1; POLD4; POLD2;
ptr01100:	3	20	0.530035	5.11063	0.0199165	1	0.174846	0.658022	EXOSC4; EXOSC5; EXOSC7;
ptr01100:	3	20	0.530035	5.11063	0.0199165	1	0.174846	0.658022	SLC25A1; MDH2; SLC25A10;
ptr01100:	3	21	0.530035	4.86739	0.0227388	1	0.189641	0.713704	BAD; RPS6KB2; MLST8;
ptr01100:	3	22	0.530035	4.64624	0.0257667	1	0.206629	0.777637	UBE2C; ANAPC11; PLK1;
ptr01100:	3	22	0.530035	4.64624	0.0257667	1	0.206629	0.777637	UBE2C; ANAPC11; CDC20;
ptr01100:	3	22	0.530035	4.64624	0.0257667	1	0.206629	0.777637	POLD1; POLD4; POLD2;
ptr01100:	3	23	0.530035	4.44432	0.0289998	1	0.219172	0.824841	UBE2C; ANAPC11; CDC20;
ptr01100:	3	27	0.530035	3.78615	0.0439555	1	0.289794	1	BAD; RPS6KB2; MLST8;
ptr01100:	3	28	0.530035	3.65097	0.0481891	1	0.304467	1	TUBA4A; PPIA; CFL1;
ptr01100:	3	28	0.530035	3.65097	0.0481891	1	0.304467	1	POLR2H; XAB2; POLR2I;
ptr01100:	3	28	0.530035	3.65097	0.0481891	1	0.304467	1	POLR2H; XAB2; POLR2I;
ptr01100:	3	28	0.530035	3.65097	0.0481891	1	0.304467	1	VPS28; CHMP4B; HGS;
ptr01100:	3	28	0.530035	3.65097	0.0481891	1	0.304467	1	DGAT1; SLC25A1; AGPAT2;
	3	29	0.530035	3.52512	0.0526146	1	0.323842	1	POLR2H; GTF3C5; SNAPC2;
	3	29	0.530035	3.52512	0.0526146	1	0.323842	1	GYS1; TRIP10; STX4;
	3	30	0.530035	3.40766	0.0572286	1	0.333609	1	BAD; RPS6KB2; MLST8;
	3	31	0.530035	3.29777	0.0620272	1	0.353111	1	POLD1; POLD4; POLD2;
	3	31	0.530035	3.29777	0.0620272	1	0.353111	1	BAD; BBC3; E2F1;
	3	32	0.530035	3.19475	0.0670063	1	0.37759	1	RPS6KA4; AP2A1; AP2S1;
	3	32	0.530035	3.19475	0.0670063	1	0.37759	1	BAD; RPS6KB2; MLST8;
	3	33	0.530035	3.09796	0.0721617	1	0.397246	1	POLD1; POLD4; POLD2;
	3	34	0.530035	3.00687	0.0774886	1	0.420588	1	POLR2H; GTF3C5; SNAPC2;
	3	34	0.530035	3.00687	0.0774886	1	0.420588	1	POLR2H; GTF3C5; SNAPC2;
	3	35	0.530035	2.92099	0.0829825	1	0.432546	1	MED15; TRIM28; MED25;
	3	37	0.530035	2.76314	0.0944515	1	0.477409	1	HRAS; MAP2K2; MLST8;
	3	38	0.530035	2.69044	0.100416	1	0.495546	1	BAD; HRAS; MAP2K2;
	3	39	0.530035	2.62148	0.106528	1	0.509137	1	POLR2H; POLR2I; TAF10;
	3	39	0.530035	2.62148	0.106528	1	0.509137	1	POLR2H; POLR2I; TAF10;
	3	39	0.530035	2.62148	0.106528	1	0.509137	1	POLR2H; POLR2I; TAF10;
	3	39	0.530035	2.62148	0.106528	1	0.509137	1	POLR2H; POLR2I; TAF10;
	3	39	0.530035	2.62148	0.106528	1	0.509137	1	POLR2H; POLR2I; TAF10;
	3	39	0.530035	2.62148	0.106528	1	0.509137	1	POLR2H; POLR2I; TAF10;
	3	48	0.530035	2.13005	0.167243	1	0.66737	1	PLEC; CD151; ITGB4;
	3	50	0.530035	2.04487	0.181891	1	0.710524	1	RELA; MAP2K2; NFKBIB;
	3	50	0.530035	2.04487	0.181891	1	0.710524	1	RPS6KA4; HSPB1; KRT19;
	3	51	0.530035	2.00478	0.18934	1	0.711486	1	HRAS; MAP2K2; MLST8;
	3	52	0.530035	1.96623	0.196866	1	0.73062	1	BAD; HRAS; MAP2K2;
	3	53	0.530035	1.92914	0.204463	1	0.746266	1	HRAS; MAP2K2; MLST8;
	3	54	0.530035	1.89342	0.212126	1	0.756184	1	RELA; MAP2K2; NFKBIB;
	3	56	0.530035	1.82581	0.22763	1	0.797814	1	HRAS; MAP2K2; MLST8;
	3	57	0.530035	1.79379	0.235462	1	0.797814	1	HRAS; MAP2K2; AGRN;
	3	61	0.530035	1.67618	0.267206	1	0.862741	1	RELA; HRAS; MAP2K2;
	3	64	0.530035	1.59762	0.291327	1	0.916857	1	RRAS; RHOC; CFL1;
	3	64	0.530035	1.59762	0.291327	1	0.916857	1	ADRM1; DVL1; AXIN1;
	3	64	0.530035	1.59762	0.291327	1	0.916857	1	AURKAIP1; RELA; FZR1;
	3	66	0.530035	1.54922	0.307493	1	0.954331	1	E2F1; SMARCA4; AATF;
	3	67	0.530035	1.5261	0.315589	1	0.964043	1	RELA; HRAS; NFKBIB;
	3	69	0.530035	1.48187	0.33179	1	0.984744	1	MED15; MED25; RELA;
	3	69	0.530035	1.48187	0.33179	1	0.984744	1	BCAR1; RELA; HRAS;
	3	72	0.530035	1.42013	0.356058	1	1	1	BCAR1; ITGB4; BSG;
	3	82	0.530035	1.24697	0.435642	1	1	1	DVL1; AXIN1; JUP;
	3	83	0.530035	1.23195	0.443419	1	1	1	GNB2; TALDO1; TKT;
	3	84	0.530035	1.21728	0.451154	1	1	1	TRIM28; HRAS; MAD1L1;
	3	85	0.530035	1.20296	0.458845	1	1	1	RPL8; EEF1D; RPL28;
	3	92	0.530035	1.11144	0.511287	1	1	1	RPL8; EIF3B; RPL28;
	3	92	0.530035	1.11144	0.511287	1	1	1	POLR2H; GTF3C5; SNAPC2;
	3	95	0.530035	1.07635	0.532929	1	1	1	BAD; E2F1; FKBP8;
	3	98	0.530035	1.0434	0.55402	1	1	1	AURKAIP1; RELA; FZR1;
	3	101	0.530035	1.01241	0.574535	1	1	1	GIPC1; BAD; HRAS;
	3	102	0.530035	1.00249	0.581241	1	1	1	RPL8; EIF3B; RPL28;
	3	102	0.530035	1.00249	0.581241	1	1	1	RPL8; EIF3B; RPL28;
	3	103	0.530035	0.992756	0.58788	1	1	1	RPL8; EIF3B; RPL28;
	3	104	0.530035	0.983211	0.594451	1	1	1	RPL8; RNPS1; RPL28;
	3	104	0.530035	0.983211	0.594451	1	1	1	RPL8; RNPS1; RPL28;
	3	110	0.530035	0.929586	0.632427	1	1	1	RPL8; EIF3B; RPL28;
	3	110	0.530035	0.929586	0.632427	1	1	1	RPL8; EIF3B; RPL28;
	3	119	0.530035	0.859287	0.684624	1	1	1	KIF22; HMG20B; MAFK;
	3	127	0.530035	0.805163	0.726206	1	1	1	RELA; HRAS; MAP2K2;
	3	132	0.530035	0.774667	0.749942	1	1	1	RPL8; RPL28; RPN1;
	3	247	0.530035	0.414007	0.97786	1	1	1	SLC39A4; SLC16A3; SLC4A2;
	3	530	0.530035	0.192947	0.999984	1	1	1	GNA15; PLCB3; RHOC;
ptr01100:	2	2	0.353357	33.9747	0.000864826	1	0.0739194	0.278191	TALDO1; TKT;
ptr01100:	2	3	0.353357	22.6874	0.00254374	1	0.0891367	0.335461	HMGA1; BANF1;
ptr01100:	2	4	0.353357	17.0297	0.00498825	1	0.114692	0.431637	BBC3; E2F1;
ptr01100:	2	6	0.353357	11.3626	0.0119906	1	0.137253	0.516542	RUVBL2; NHP2;
ptr01100:	2	6	0.353357	11.3626	0.0119906	1	0.137253	0.516542	OPLAH; GSS;
ptr01100:	2	6	0.353357	11.3626	0.0119906	1	0.137253	0.516542	TALDO1; TKT;
ptr01100:	2	7	0.353357	9.74167	0.0164618	1	0.156905	0.590502	AP2A1; AP2S1;
ptr01100:	2	7	0.353357	9.74167	0.0164618	1	0.156905	0.590502	HRAS; MAP2K2;
ptr01100:	2	7	0.353357	9.74167	0.0164618	1	0.156905	0.590502	HRAS; MAP2K2;
ptr01100:	2	7	0.353357	9.74167	0.0164618	1	0.156905	0.590502	HMGA1; BANF1;
ptr01100:	2	7	0.353357	9.74167	0.0164618	1	0.156905	0.590502	APRT; DGUOK;
ptr01100:	2	8	0.353357	8.52548	0.0215252	1	0.180422	0.679009	ARHGAP39; GPC1;
ptr01100:	2	8	0.353357	8.52548	0.0215252	1	0.180422	0.679009	STX4; AP2S1;
ptr01100:	2	8	0.353357	8.52548	0.0215252	1	0.180422	0.679009	BAD; AATF;
ptr01100:	2	8	0.353357	8.52548	0.0215252	1	0.180422	0.679009	ARHGDIA; RHOC;
ptr01100:	2	8	0.353357	8.52548	0.0215252	1	0.180422	0.679009	ARHGDIA; RHOC;
ptr01100:	2	8	0.353357	8.52548	0.0215252	1	0.180422	0.679009	MPG; NTHL1;
ptr01100:	2	8	0.353357	8.52548	0.0215252	1	0.180422	0.679009	FPGS; SLC19A1;
ptr01100:	2	9	0.353357	7.57926	0.0271421	1	0.211557	0.79618	AP2A1; AP2S1;
ptr01100:	2	9	0.353357	7.57926	0.0271421	1	0.211557	0.79618	MPG; NTHL1;
ptr01100:	2	9	0.353357	7.57926	0.0271421	1	0.211557	0.79618	OPLAH; GSS;
ptr01100:	2	9	0.353357	7.57926	0.0271421	1	0.211557	0.79618	GPX1; GPX4;
ptr01100:	2	9	0.353357	7.57926	0.0271421	1	0.211557	0.79618	NME2; NME3;
ptr01100:	2	10	0.353357	6.82209	0.0332758	1	0.238214	0.896506	MPG; NTHL1;
ptr01100:	2	11	0.353357	6.20246	0.0398909	1	0.267837	1	HRAS; MAP2K2;
ptr01100:	2	11	0.353357	6.20246	0.0398909	1	0.267837	1	AP2A1; AP2S1;
ptr01100:	2	11	0.353357	6.20246	0.0398909	1	0.267837	1	NT5C; GPX1;
ptr01100:	2	11	0.353357	6.20246	0.0398909	1	0.267837	1	RELA; NFKBIB;
ptr01100:	2	11	0.353357	6.20246	0.0398909	1	0.267837	1	NME2; NME3;
ptr01100:	2	12	0.353357	5.68602	0.046954	1	0.303563	1	TUBGCP2; FZR1;
ptr01100:	2	12	0.353357	5.68602	0.046954	1	0.303563	1	MPG; NTHL1;
	2	13	0.353357	5.24897	0.0544331	1	0.330162	1	IRAK1; RELA;
	2	13	0.353357	5.24897	0.0544331	1	0.330162	1	HRAS; MAP2K2;
	2	13	0.353357	5.24897	0.0544331	1	0.330162	1	RELA; NFKBIB;
	2	14	0.353357	4.87431	0.0622977	1	0.353444	1	POLR2H; POLR2I;
	2	15	0.353357	4.54957	0.0705186	1	0.389487	1	HRAS; MAP2K2;
	2	15	0.353357	4.54957	0.0705186	1	0.389487	1	HRAS; MAP2K2;
	2	15	0.353357	4.54957	0.0705186	1	0.389487	1	HRAS; MAP2K2;
	2	15	0.353357	4.54957	0.0705186	1	0.389487	1	CDT1; E2F1;
	2	15	0.353357	4.54957	0.0705186	1	0.389487	1	CDT1; E2F1;
	2	15	0.353357	4.54957	0.0705186	1	0.389487	1	UBE2M; SMARCA4;
	2	16	0.353357	4.2654	0.0790683	1	0.421361	1	HRAS; MAP2K2;
	2	16	0.353357	4.2654	0.0790683	1	0.421361	1	IRAK1; RELA;
	2	16	0.353357	4.2654	0.0790683	1	0.421361	1	HRAS; MAP2K2;
	2	16	0.353357	4.2654	0.0790683	1	0.421361	1	HRAS; MAP2K2;
	2	16	0.353357	4.2654	0.0790683	1	0.421361	1	GUK1; DTYMK;
	2	18	0.353357	3.79173	0.0970492	1	0.484665	1	HRAS; MAP2K2;
	2	18	0.353357	3.79173	0.0970492	1	0.484665	1	DVL1; AXIN1;
	2	19	0.353357	3.59227	0.106432	1	0.509137	1	HRAS; MAP2K2;
	2	20	0.353357	3.41275	0.116044	1	0.528858	1	AP2A1; AP2S1;
	2	20	0.353357	3.41275	0.116044	1	0.528858	1	HRAS; MAP2K2;
	2	20	0.353357	3.41275	0.116044	1	0.528858	1	MVD; EBP;
	2	20	0.353357	3.41275	0.116044	1	0.528858	1	POLR2H; GTF3C5;
	2	21	0.353357	3.25031	0.125866	1	0.564367	1	BAD; AATF;
	2	21	0.353357	3.25031	0.125866	1	0.564367	1	HRAS; MAP2K2;
	2	21	0.353357	3.25031	0.125866	1	0.564367	1	E2F1; MYBL2;
	2	21	0.353357	3.25031	0.125866	1	0.564367	1	POLR2H; GTF3C5;
	2	22	0.353357	3.10264	0.135876	1	0.595527	1	POLR2H; POLR2I;
	2	22	0.353357	3.10264	0.135876	1	0.595527	1	POLR2H; POLR2I;
	2	22	0.353357	3.10264	0.135876	1	0.595527	1	NT5C; TK1;
	2	22	0.353357	3.10264	0.135876	1	0.595527	1	POLR2H; SNAPC2;
	2	23	0.353357	2.9678	0.146055	1	0.621477	1	ARHGAP39; GPC1;
	2	23	0.353357	2.9678	0.146055	1	0.621477	1	BCAR1; RHOC;
	2	24	0.353357	2.84419	0.156383	1	0.652119	1	DGAT1; AGPAT2;
	2	25	0.353357	2.73047	0.166845	1	0.66737	1	TRAF2; IRF3;
	2	25	0.353357	2.73047	0.166845	1	0.66737	1	MVD; EBP;
	2	26	0.353357	2.62549	0.177422	1	0.697972	1	POLR2H; POLR2I;
	2	26	0.353357	2.62549	0.177422	1	0.697972	1	POLR2H; POLR2I;
	2	26	0.353357	2.62549	0.177422	1	0.697972	1	GPAA1; DPM2;
	2	26	0.353357	2.62549	0.177422	1	0.697972	1	HRAS; MAP2K2;
	2	27	0.353357	2.52829	0.188099	1	0.711486	1	AP2A1; AP2S1;
	2	27	0.353357	2.52829	0.188099	1	0.711486	1	RRAS; RHOC;
	2	28	0.353357	2.43803	0.198862	1	0.73062	1	HRAS; RRAS;
	2	28	0.353357	2.43803	0.198862	1	0.73062	1	CDT1; E2F1;
	2	28	0.353357	2.43803	0.198862	1	0.73062	1	POLR2H; POLR2I;
	2	28	0.353357	2.43803	0.198862	1	0.73062	1	HRAS; MAP2K2;
	2	28	0.353357	2.43803	0.198862	1	0.73062	1	GNA15; PLCB3;
	2	29	0.353357	2.35399	0.209695	1	0.756184	1	BCAR1; RELA;
	2	30	0.353357	2.27555	0.220585	1	0.781181	1	HRAS; MAP2K2;
	2	30	0.353357	2.27555	0.220585	1	0.781181	1	ALG3; DPM2;
	2	31	0.353357	2.20216	0.23152	1	0.797814	1	HMGA1; BANF1;
	2	31	0.353357	2.20216	0.23152	1	0.797814	1	E2F1; CKS1B;
	2	31	0.353357	2.20216	0.23152	1	0.797814	1	E2F1; CKS1B;
	2	31	0.353357	2.20216	0.23152	1	0.797814	1	BSG; MDH2;
	2	31	0.353357	2.20216	0.23152	1	0.797814	1	PAFAH1B3; NUDC;
	2	32	0.353357	2.13337	0.242488	1	0.817111	1	BCAR1; MAP2K2;
	2	33	0.353357	2.06874	0.253477	1	0.846479	1	BCAR1; MDK;
	2	33	0.353357	2.06874	0.253477	1	0.846479	1	BAD; STUB1;
	2	34	0.353357	2.00791	0.264476	1	0.856594	1	CPSF1; RNPS1;
	2	34	0.353357	2.00791	0.264476	1	0.856594	1	CPSF1; RNPS1;
	2	34	0.353357	2.00791	0.264476	1	0.856594	1	HRAS; RRAS;
	2	34	0.353357	2.00791	0.264476	1	0.856594	1	HRAS; RRAS;
	2	34	0.353357	2.00791	0.264476	1	0.856594	1	HMGA1; BANF1;
	2	34	0.353357	2.00791	0.264476	1	0.856594	1	GNA15; PLCB3;
	2	35	0.353357	1.95056	0.275476	1	0.885344	1	RELA; TRAF2;
	2	35	0.353357	1.95056	0.275476	1	0.885344	1	HRAS; ITGB4;
	2	38	0.353357	1.79661	0.308384	1	0.954331	1	RANGAP1; RFXANK;
	2	38	0.353357	1.79661	0.308384	1	0.954331	1	GNA15; PLCB3;
	2	39	0.353357	1.75055	0.319295	1	0.964043	1	PLEC; BCAP31;
	2	39	0.353357	1.75055	0.319295	1	0.964043	1	TNIP2; IRAK1;
	2	40	0.353357	1.7068	0.330164	1	0.983418	1	HRAS; RRAS;
	2	42	0.353357	1.62554	0.351749	1	1	1	POLR2H; POLR2I;
	2	42	0.353357	1.62554	0.351749	1	1	1	PLK1; CKS1B;
	2	43	0.353357	1.58775	0.362452	1	1	1	CPSF1; RNPS1;
	2	43	0.353357	1.58775	0.362452	1	1	1	CPSF1; RNPS1;
	2	43	0.353357	1.58775	0.362452	1	1	1	CPSF1; RNPS1;
	2	45	0.353357	1.5172	0.383652	1	1	1	ARFGAP1; YIF1A;
	2	46	0.353357	1.48422	0.394138	1	1	1	DVL1; AXIN1;
	2	47	0.353357	1.45265	0.404541	1	1	1	H2AFX; ACD;
	2	48	0.353357	1.42239	0.414859	1	1	1	PLEC; BCAP31;
	2	48	0.353357	1.42239	0.414859	1	1	1	H2AFX; XRCC3;
	2	50	0.353357	1.36551	0.435219	1	1	1	TNIP2; RELA;
	2	52	0.353357	1.313	0.45519	1	1	1	LMNB2; TRAF2;
	2	52	0.353357	1.313	0.45519	1	1	1	BCAR1; CAPN1;
	2	53	0.353357	1.28823	0.465023	1	1	1	PPP1CA; PLCB3;
	2	55	0.353357	1.24139	0.484368	1	1	1	CPSF1; RNPS1;
	2	57	0.353357	1.19784	0.503274	1	1	1	IRAK1; RELA;
	2	58	0.353357	1.1772	0.512557	1	1	1	RELA; TRAF2;
	2	60	0.353357	1.13796	0.530778	1	1	1	HRAS; RRAS;
	2	63	0.353357	1.08378	0.557226	1	1	1	ARFGAP1; YIF1A;
	2	63	0.353357	1.08378	0.557226	1	1	1	BAD; HRAS;
	2	64	0.353357	1.06685	0.565803	1	1	1	BCAR1; RELA;
	2	64	0.353357	1.06685	0.565803	1	1	1	MPG; UBE2M;
	2	65	0.353357	1.05044	0.57426	1	1	1	HRAS; MAP2K2;
	2	67	0.353357	1.01909	0.590812	1	1	1	RELA; E2F1;
	2	68	0.353357	1.0041	0.598907	1	1	1	E2F1; ACD;
	2	72	0.353357	0.948328	0.630077	1	1	1	H2AFX; ACD;
	2	76	0.353357	0.898423	0.659328	1	1	1	GNB2; KCNN4;
	2	77	0.353357	0.886756	0.666345	1	1	1	PAK4; HRAS;
	2	80	0.353357	0.853507	0.686696	1	1	1	ALDOA; NAA10;
	2	80	0.353357	0.853507	0.686696	1	1	1	RELA; SMARCA4;
	2	82	0.353357	0.832692	0.69969	1	1	1	RPL8; RPL28;
	2	82	0.353357	0.832692	0.69969	1	1	1	RPL8; RPL28;
	2	82	0.353357	0.832692	0.69969	1	1	1	RPL8; RPL28;
	2	85	0.353357	0.803307	0.71834	1	1	1	RELA; SMARCA4;
	2	87	0.353357	0.784842	0.730225	1	1	1	RPL8; RPL28;
	2	94	0.353357	0.726403	0.768513	1	1	1	SLC39A4; SLC16A3;
	2	98	0.353357	0.696757	0.788202	1	1	1	RPL8; RPL28;
	2	108	0.353357	0.632248	0.831094	1	1	1	RPL8; RPL28;
	2	108	0.353357	0.632248	0.831094	1	1	1	ZMIZ2; PKN1;
	2	120	0.353357	0.569029	0.872134	1	1	1	GNA15; PLCB3;
	2	133	0.353357	0.513413	0.906099	1	1	1	RELA; HRAS;
	2	135	0.353357	0.505808	0.910508	1	1	1	RUVBL2; SMARCA4;
	2	274	0.353357	0.249221	0.997524	1	1	1	NMB; DRD4;
	2	336	0.353357	0.203235	0.999546	1	1	1	NMB; DRD4;
ptr01100:	1	1	0.176678	33.9747	0.0294332	1	0.219172	0.824841	PPIA;
ptr01100:	1	1	0.176678	33.9747	0.0294332	1	0.219172	0.824841	PPIA;
ptr01100:	1	1	0.176678	33.9747	0.0294332	1	0.219172	0.824841	PPIA;
ptr01100:	1	1	0.176678	33.9747	0.0294332	1	0.219172	0.824841	PPIA;
ptr01100:	1	1	0.176678	33.9747	0.0294332	1	0.219172	0.824841	APRT;
ptr01100:	1	1	0.176678	33.9747	0.0294332	1	0.219172	0.824841	COMT;
	1	2	0.176678	17.0719	0.0580015	1	0.333609	1	MAP2K2;
	1	2	0.176678	17.0719	0.0580015	1	0.333609	1	COMT;
	1	2	0.176678	17.0719	0.0580015	1	0.333609	1	COMT;
	1	2	0.176678	17.0719	0.0580015	1	0.333609	1	MAD1L1;
	1	2	0.176678	17.0719	0.0580015	1	0.333609	1	PPIA;
	1	2	0.176678	17.0719	0.0580015	1	0.333609	1	NOSIP;
	1	2	0.176678	17.0719	0.0580015	1	0.333609	1	MAD1L1;
	1	2	0.176678	17.0719	0.0580015	1	0.333609	1	DOHH;
	1	2	0.176678	17.0719	0.0580015	1	0.333609	1	NAPRT;
	1	2	0.176678	17.0719	0.0580015	1	0.333609	1	DOHH;
	1	2	0.176678	17.0719	0.0580015	1	0.333609	1	TSTA3;
	1	2	0.176678	17.0719	0.0580015	1	0.333609	1	GSS;
	1	2	0.176678	17.0719	0.0580015	1	0.333609	1	MDK;
	1	3	0.176678	11.4001	0.0857304	1	0.437304	1	COMT;
	1	3	0.176678	11.4001	0.0857304	1	0.437304	1	E2F1;
	1	3	0.176678	11.4001	0.0857304	1	0.437304	1	MPG;
	1	3	0.176678	11.4001	0.0857304	1	0.437304	1	MPG;
	1	3	0.176678	11.4001	0.0857304	1	0.437304	1	MPG;
	1	3	0.176678	11.4001	0.0857304	1	0.437304	1	DPM2;
	1	3	0.176678	11.4001	0.0857304	1	0.437304	1	ACOT8;
	1	4	0.176678	8.55721	0.112644	1	0.521919	1	RPS6KB2;
	1	4	0.176678	8.55721	0.112644	1	0.521919	1	H2AFX;
	1	4	0.176678	8.55721	0.112644	1	0.521919	1	H2AFX;
	1	4	0.176678	8.55721	0.112644	1	0.521919	1	SLC16A3;
	1	4	0.176678	8.55721	0.112644	1	0.521919	1	E2F1;
	1	4	0.176678	8.55721	0.112644	1	0.521919	1	BLVRB;
	1	4	0.176678	8.55721	0.112644	1	0.521919	1	PGLS;
	1	5	0.176678	6.84919	0.138768	1	0.595527	1	HRAS;
	1	5	0.176678	6.84919	0.138768	1	0.595527	1	ARHGDIA;
	1	5	0.176678	6.84919	0.138768	1	0.595527	1	PLCB3;
	1	5	0.176678	6.84919	0.138768	1	0.595527	1	DRD4;
	1	5	0.176678	6.84919	0.138768	1	0.595527	1	NTHL1;
	1	5	0.176678	6.84919	0.138768	1	0.595527	1	NTHL1;
	1	5	0.176678	6.84919	0.138768	1	0.595527	1	NTHL1;
	1	5	0.176678	6.84919	0.138768	1	0.595527	1	FPGS;
	1	5	0.176678	6.84919	0.138768	1	0.595527	1	TK1;
	1	5	0.176678	6.84919	0.138768	1	0.595527	1	MDH2;
	1	6	0.176678	5.70956	0.164123	1	0.659656	1	MAP2K2;
	1	6	0.176678	5.70956	0.164123	1	0.659656	1	COMT;
	1	6	0.176678	5.70956	0.164123	1	0.659656	1	PLCB3;
	1	6	0.176678	5.70956	0.164123	1	0.659656	1	MLST8;
	1	6	0.176678	5.70956	0.164123	1	0.659656	1	HRAS;
	1	6	0.176678	5.70956	0.164123	1	0.659656	1	ACOT8;
	1	6	0.176678	5.70956	0.164123	1	0.659656	1	ECI1;
	1	6	0.176678	5.70956	0.164123	1	0.659656	1	H2AFX;
	1	6	0.176678	5.70956	0.164123	1	0.659656	1	H2AFX;
	1	6	0.176678	5.70956	0.164123	1	0.659656	1	COMT;
	1	6	0.176678	5.70956	0.164123	1	0.659656	1	COASY;
	1	6	0.176678	5.70956	0.164123	1	0.659656	1	IRF3;
	1	6	0.176678	5.70956	0.164123	1	0.659656	1	RELA;
	1	6	0.176678	5.70956	0.164123	1	0.659656	1	GYS1;
	1	7	0.176678	4.89507	0.188733	1	0.711486	1	AP2S1;
	1	7	0.176678	4.89507	0.188733	1	0.711486	1	ARHGDIA;
	1	7	0.176678	4.89507	0.188733	1	0.711486	1	AXIN1;
	1	7	0.176678	4.89507	0.188733	1	0.711486	1	TK1;
	1	7	0.176678	4.89507	0.188733	1	0.711486	1	GPAA1;
	1	7	0.176678	4.89507	0.188733	1	0.711486	1	BAD;
	1	7	0.176678	4.89507	0.188733	1	0.711486	1	TRAF2;
	1	7	0.176678	4.89507	0.188733	1	0.711486	1	HRAS;
	1	7	0.176678	4.89507	0.188733	1	0.711486	1	COASY;
	1	7	0.176678	4.89507	0.188733	1	0.711486	1	SMPD4;
	1	7	0.176678	4.89507	0.188733	1	0.711486	1	COMT;
	1	7	0.176678	4.89507	0.188733	1	0.711486	1	ALDOA;
	1	7	0.176678	4.89507	0.188733	1	0.711486	1	COMT;
	1	8	0.176678	4.28395	0.21262	1	0.756184	1	RRAS;
	1	8	0.176678	4.28395	0.21262	1	0.756184	1	GPC1;
	1	8	0.176678	4.28395	0.21262	1	0.756184	1	GNA15;
	1	8	0.176678	4.28395	0.21262	1	0.756184	1	PLCB3;
	1	8	0.176678	4.28395	0.21262	1	0.756184	1	ARHGDIA;
	1	8	0.176678	4.28395	0.21262	1	0.756184	1	E2F1;
	1	8	0.176678	4.28395	0.21262	1	0.756184	1	ACOT8;
	1	8	0.176678	4.28395	0.21262	1	0.756184	1	H2AFX;
	1	8	0.176678	4.28395	0.21262	1	0.756184	1	NAPRT;
	1	8	0.176678	4.28395	0.21262	1	0.756184	1	IRAK1;
	1	9	0.176678	3.80848	0.235805	1	0.797814	1	GPC1;
	1	9	0.176678	3.80848	0.235805	1	0.797814	1	KCNN4;
	1	9	0.176678	3.80848	0.235805	1	0.797814	1	HRAS;
	1	9	0.176678	3.80848	0.235805	1	0.797814	1	RELA;
	1	9	0.176678	3.80848	0.235805	1	0.797814	1	BAD;
	1	9	0.176678	3.80848	0.235805	1	0.797814	1	MGAT4B;
	1	9	0.176678	3.80848	0.235805	1	0.797814	1	COASY;
	1	9	0.176678	3.80848	0.235805	1	0.797814	1	SLC4A2;
	1	9	0.176678	3.80848	0.235805	1	0.797814	1	TRAF2;
	1	9	0.176678	3.80848	0.235805	1	0.797814	1	TRAF2;
	1	9	0.176678	3.80848	0.235805	1	0.797814	1	IRF3;
	1	9	0.176678	3.80848	0.235805	1	0.797814	1	PRKCSH;
	1	9	0.176678	3.80848	0.235805	1	0.797814	1	PTGES2;
	1	10	0.176678	3.42801	0.258308	1	0.846479	1	BCAR1;
	1	10	0.176678	3.42801	0.258308	1	0.846479	1	GNA15;
	1	10	0.176678	3.42801	0.258308	1	0.846479	1	BSG;
	1	10	0.176678	3.42801	0.258308	1	0.846479	1	NT5C;
	1	10	0.176678	3.42801	0.258308	1	0.846479	1	ARFGAP1;
	1	10	0.176678	3.42801	0.258308	1	0.846479	1	ARFGAP1;
	1	10	0.176678	3.42801	0.258308	1	0.846479	1	SLC39A4;
	1	10	0.176678	3.42801	0.258308	1	0.846479	1	IRAK1;
	1	10	0.176678	3.42801	0.258308	1	0.846479	1	IRAK1;
	1	10	0.176678	3.42801	0.258308	1	0.846479	1	IRF3;
	1	10	0.176678	3.42801	0.258308	1	0.846479	1	MVD;
	1	11	0.176678	3.11666	0.28015	1	0.888384	1	MLST8;
	1	11	0.176678	3.11666	0.28015	1	0.888384	1	MLST8;
	1	11	0.176678	3.11666	0.28015	1	0.888384	1	E2F1;
	1	11	0.176678	3.11666	0.28015	1	0.888384	1	PLCB3;
	1	11	0.176678	3.11666	0.28015	1	0.888384	1	PLEC;
	1	11	0.176678	3.11666	0.28015	1	0.888384	1	ITGB4;
	1	11	0.176678	3.11666	0.28015	1	0.888384	1	PKN1;
	1	12	0.176678	2.85715	0.301349	1	0.937781	1	MGAT4B;
	1	12	0.176678	2.85715	0.301349	1	0.937781	1	PRKCSH;
	1	12	0.176678	2.85715	0.301349	1	0.937781	1	SLC16A3;
	1	12	0.176678	2.85715	0.301349	1	0.937781	1	PPP1CA;
	1	12	0.176678	2.85715	0.301349	1	0.937781	1	POLR2H;
	1	13	0.176678	2.63754	0.321926	1	0.964043	1	IRAK1;
	1	13	0.176678	2.63754	0.321926	1	0.964043	1	PRKCSH;
	1	13	0.176678	2.63754	0.321926	1	0.964043	1	LSM4;
	1	13	0.176678	2.63754	0.321926	1	0.964043	1	TRAF2;
	1	13	0.176678	2.63754	0.321926	1	0.964043	1	TRAF2;
	1	13	0.176678	2.63754	0.321926	1	0.964043	1	TSTA3;
	1	13	0.176678	2.63754	0.321926	1	0.964043	1	MVD;
	1	13	0.176678	2.63754	0.321926	1	0.964043	1	EBP;
	1	13	0.176678	2.63754	0.321926	1	0.964043	1	EBP;
	1	13	0.176678	2.63754	0.321926	1	0.964043	1	EBP;
	1	13	0.176678	2.63754	0.321926	1	0.964043	1	MDH2;
	1	13	0.176678	2.63754	0.321926	1	0.964043	1	PNKP;
	1	14	0.176678	2.44928	0.341897	1	0.997001	1	RRAS;
	1	14	0.176678	2.44928	0.341897	1	0.997001	1	CPSF1;
	1	14	0.176678	2.44928	0.341897	1	0.997001	1	PKMYT1;
	1	14	0.176678	2.44928	0.341897	1	0.997001	1	PFDN2;
	1	14	0.176678	2.44928	0.341897	1	0.997001	1	DOHH;
	1	14	0.176678	2.44928	0.341897	1	0.997001	1	ECI1;
	1	14	0.176678	2.44928	0.341897	1	0.997001	1	PHKG2;
	1	14	0.176678	2.44928	0.341897	1	0.997001	1	PNPLA2;
	1	14	0.176678	2.44928	0.341897	1	0.997001	1	RELA;
	1	15	0.176678	2.2861	0.361281	1	1	1	CFL1;
	1	15	0.176678	2.2861	0.361281	1	1	1	GNB2;
	1	15	0.176678	2.2861	0.361281	1	1	1	GNB2;
	1	15	0.176678	2.2861	0.361281	1	1	1	GNB2;
	1	15	0.176678	2.2861	0.361281	1	1	1	ACOT8;
	1	15	0.176678	2.2861	0.361281	1	1	1	PFDN2;
	1	15	0.176678	2.2861	0.361281	1	1	1	AGPAT2;
	1	15	0.176678	2.2861	0.361281	1	1	1	RANGAP1;
	1	15	0.176678	2.2861	0.361281	1	1	1	GNA15;
	1	16	0.176678	2.14331	0.380095	1	1	1	GNA15;
	1	16	0.176678	2.14331	0.380095	1	1	1	DRAP1;
	1	16	0.176678	2.14331	0.380095	1	1	1	DPM2;
	1	16	0.176678	2.14331	0.380095	1	1	1	PFDN2;
	1	16	0.176678	2.14331	0.380095	1	1	1	AGPAT2;
	1	17	0.176678	2.01731	0.398356	1	1	1	GNA15;
	1	17	0.176678	2.01731	0.398356	1	1	1	HRAS;
	1	17	0.176678	2.01731	0.398356	1	1	1	DPM2;
	1	17	0.176678	2.01731	0.398356	1	1	1	SLC39A4;
	1	17	0.176678	2.01731	0.398356	1	1	1	MLST8;
	1	17	0.176678	2.01731	0.398356	1	1	1	POLR2H;
	1	17	0.176678	2.01731	0.398356	1	1	1	RELA;
	1	18	0.176678	1.9053	0.41608	1	1	1	HRAS;
	1	18	0.176678	1.9053	0.41608	1	1	1	PPP1CA;
	1	18	0.176678	1.9053	0.41608	1	1	1	NOSIP;
	1	18	0.176678	1.9053	0.41608	1	1	1	NOSIP;
	1	18	0.176678	1.9053	0.41608	1	1	1	SLC25A1;
	1	19	0.176678	1.80507	0.433283	1	1	1	ACOT8;
	1	19	0.176678	1.80507	0.433283	1	1	1	MDH2;
	1	19	0.176678	1.80507	0.433283	1	1	1	ECI1;
	1	19	0.176678	1.80507	0.433283	1	1	1	GSTP1;
	1	19	0.176678	1.80507	0.433283	1	1	1	BCAR1;
	1	20	0.176678	1.71486	0.44998	1	1	1	BCAR1;
	1	20	0.176678	1.71486	0.44998	1	1	1	ACOT8;
	1	20	0.176678	1.71486	0.44998	1	1	1	POLR2H;
	1	21	0.176678	1.63324	0.466186	1	1	1	KIF22;
	1	21	0.176678	1.63324	0.466186	1	1	1	AP2S1;
	1	21	0.176678	1.63324	0.466186	1	1	1	AP2S1;
	1	21	0.176678	1.63324	0.466186	1	1	1	ACD;
	1	21	0.176678	1.63324	0.466186	1	1	1	RHOC;
	1	21	0.176678	1.63324	0.466186	1	1	1	POLR2H;
	1	21	0.176678	1.63324	0.466186	1	1	1	HSPB1;
	1	21	0.176678	1.63324	0.466186	1	1	1	JUP;
	1	22	0.176678	1.55904	0.481915	1	1	1	RHOC;
	1	22	0.176678	1.55904	0.481915	1	1	1	MAP2K2;
	1	23	0.176678	1.49128	0.497181	1	1	1	CPSF1;
	1	23	0.176678	1.49128	0.497181	1	1	1	CPSF1;
	1	23	0.176678	1.49128	0.497181	1	1	1	AGRN;
	1	23	0.176678	1.49128	0.497181	1	1	1	GNB2;
	1	24	0.176678	1.42917	0.511998	1	1	1	VARS;
	1	24	0.176678	1.42917	0.511998	1	1	1	POLR2H;
	1	25	0.176678	1.37203	0.52638	1	1	1	SLC39A4;
	1	25	0.176678	1.37203	0.52638	1	1	1	BAD;
	1	26	0.176678	1.31928	0.540338	1	1	1	GNA15;
	1	26	0.176678	1.31928	0.540338	1	1	1	NR1H2;
	1	27	0.176678	1.27043	0.553886	1	1	1	MLST8;
	1	27	0.176678	1.27043	0.553886	1	1	1	ACOT8;
	1	27	0.176678	1.27043	0.553886	1	1	1	JUP;
	1	27	0.176678	1.27043	0.553886	1	1	1	ATP6V0C;
	1	28	0.176678	1.22508	0.567035	1	1	1	GNB2;
	1	28	0.176678	1.22508	0.567035	1	1	1	GNB2;
	1	28	0.176678	1.22508	0.567035	1	1	1	ATP6V0C;
	1	28	0.176678	1.22508	0.567035	1	1	1	MLST8;
	1	28	0.176678	1.22508	0.567035	1	1	1	MGAT4B;
	1	28	0.176678	1.22508	0.567035	1	1	1	PFDN2;
	1	28	0.176678	1.22508	0.567035	1	1	1	IRF3;
	1	29	0.176678	1.18285	0.579797	1	1	1	BCAR1;
	1	29	0.176678	1.18285	0.579797	1	1	1	HRAS;
	1	29	0.176678	1.18285	0.579797	1	1	1	MAP3K11;
	1	29	0.176678	1.18285	0.579797	1	1	1	GNA15;
	1	30	0.176678	1.14343	0.592183	1	1	1	CDT1;
	1	30	0.176678	1.14343	0.592183	1	1	1	MAP2K2;
	1	32	0.176678	1.07199	0.615874	1	1	1	RANGAP1;
	1	32	0.176678	1.07199	0.615874	1	1	1	RELA;
	1	33	0.176678	1.03952	0.627199	1	1	1	RANGAP1;
	1	33	0.176678	1.03952	0.627199	1	1	1	STX4;
	1	33	0.176678	1.03952	0.627199	1	1	1	STX4;
	1	33	0.176678	1.03952	0.627199	1	1	1	GNB2;
	1	34	0.176678	1.00895	0.63819	1	1	1	HRAS;
	1	34	0.176678	1.00895	0.63819	1	1	1	HRAS;
	1	35	0.176678	0.980132	0.648858	1	1	1	CPSF1;
	1	35	0.176678	0.980132	0.648858	1	1	1	RELA;
	1	36	0.176678	0.952914	0.659212	1	1	1	GNB2;
	1	36	0.176678	0.952914	0.659212	1	1	1	CPSF1;
	1	36	0.176678	0.952914	0.659212	1	1	1	DRD4;
	1	36	0.176678	0.952914	0.659212	1	1	1	MLST8;
	1	37	0.176678	0.927166	0.669262	1	1	1	ATP6V0C;
	1	38	0.176678	0.902774	0.679015	1	1	1	MLST8;
	1	39	0.176678	0.879632	0.688481	1	1	1	PLCB3;
	1	39	0.176678	0.879632	0.688481	1	1	1	SIRT7;
	1	40	0.176678	0.857646	0.697669	1	1	1	PLCB3;
	1	42	0.176678	0.816816	0.715241	1	1	1	VARS;
	1	42	0.176678	0.816816	0.715241	1	1	1	H2AFX;
	1	42	0.176678	0.816816	0.715241	1	1	1	HRAS;
	1	43	0.176678	0.797824	0.72364	1	1	1	RELA;
	1	43	0.176678	0.797824	0.72364	1	1	1	BCAR1;
	1	45	0.176678	0.762373	0.739705	1	1	1	JUP;
	1	46	0.176678	0.745804	0.747384	1	1	1	PPP1CA;
	1	47	0.176678	0.729939	0.754837	1	1	1	RELA;
	1	47	0.176678	0.729939	0.754837	1	1	1	EIF3B;
	1	47	0.176678	0.729939	0.754837	1	1	1	IRF3;
	1	47	0.176678	0.729939	0.754837	1	1	1	NR1H2;
	1	48	0.176678	0.714735	0.762071	1	1	1	POLR2H;
	1	48	0.176678	0.714735	0.762071	1	1	1	PAK4;
	1	49	0.176678	0.700152	0.769092	1	1	1	E2F1;
	1	49	0.176678	0.700152	0.769092	1	1	1	PLK1;
	1	51	0.176678	0.6727	0.782518	1	1	1	RNPS1;
	1	52	0.176678	0.659766	0.788936	1	1	1	MLST8;
	1	54	0.176678	0.635335	0.801211	1	1	1	EIF3B;
	1	54	0.176678	0.635335	0.801211	1	1	1	EIF3B;
	1	54	0.176678	0.635335	0.801211	1	1	1	POLR2H;
	1	54	0.176678	0.635335	0.801211	1	1	1	GNA15;
	1	54	0.176678	0.635335	0.801211	1	1	1	HRAS;
	1	55	0.176678	0.623785	0.807079	1	1	1	EIF3B;
	1	56	0.176678	0.612648	0.812773	1	1	1	POLR2H;
	1	57	0.176678	0.601902	0.8183	1	1	1	RELA;
	1	59	0.176678	0.581502	0.82887	1	1	1	RUVBL2;
	1	62	0.176678	0.553369	0.843585	1	1	1	HMGA1;
	1	63	0.176678	0.544587	0.848203	1	1	1	ITGB4;
	1	66	0.176678	0.519837	0.861258	1	1	1	ALDOA;
	1	66	0.176678	0.519837	0.861258	1	1	1	RELA;
	1	77	0.176678	0.445584	0.900242	1	1	1	IRF3;
	1	92	0.176678	0.372942	0.936399	1	1	1	HMGA1;
	1	94	0.176678	0.365008	0.940105	1	1	1	SLC4A2;
	1	94	0.176678	0.365008	0.940105	1	1	1	E2F1;
	1	94	0.176678	0.365008	0.940105	1	1	1	E2F1;
	1	98	0.176678	0.350112	0.946884	1	1	1	IRF3;
	1	111	0.176678	0.309111	0.964056	1	1	1	RELA;
	1	125	0.176678	0.274493	0.976403	1	1	1	FZR1;
	1	167	0.176678	0.205463	0.993337	1	1	1	NMB;

## Sheet: TCGA-HSF1-COX model
unilateral	id	HR	HR.95L	HR.95H	pvalue
	age	1.02794	1.00514	1.05125	0.0160437
	gender	0.78136	0.508894	1.1997	0.259438
	grade	1.33125	0.981451	1.80573	0.0658289
	stage	1.29386	0.86209	1.94188	0.213634
	T	1.62405	0.976667	2.70056	0.061627
	N	2.25796	1.30802	3.89779	0.0034563
	HSF1	1.20781	0.772223	1.88909	0.408052
multifactorial	id	HR	HR.95L	HR.95H	pvalue
	age	1.02273	1.00045	1.04551	0.0454759
	gender	0.785056	0.505958	1.21811	0.280278
	grade	1.1917	0.878086	1.61731	0.260351
	stage	0.993804	0.516695	1.91147	0.985142
	T	1.34507	0.683067	2.64866	0.39119
	N	1.93563	1.09769	3.41322	0.0224876
	HSF1	1.1931	0.757558	1.87904	0.446149

## Sheet: TCGA-HSF1-Clinical feature
Age											Gender											Grade											Stage											（T）Tumor size

## Sheet: KRAS based-HSF1 expression
Part1	Hugo_Symbol	Entrez_Gene_Id	Center	NCBI_Build	Chromosome	Start_Position	End_Position	Strand	Consequence	Variant_Classification	Variant_Type	Reference_Allele	Tumor_Seq_Allele1	Tumor_Seq_Allele2	dbSNP_RS	dbSNP_Val_Status	Tumor_Sample_Barcode	Matched_Norm_Sample_Barcode	Match_Norm_Seq_Allele1	Match_Norm_Seq_Allele2	Tumor_Validation_Allele1	Tumor_Validation_Allele2	Match_Norm_Validation_Allele1	Match_Norm_Validation_Allele2	Verification_Status	Validation_Status	Mutation_Status	Sequencing_Phase	Sequence_Source	Validation_Method	Score	BAM_File	Sequencer	t_ref_count	t_alt_count	n_ref_count	n_alt_count	HGVSc	HGVSp	HGVSp_Short	Transcript_ID	RefSeq	Protein_position	Codons	Hotspot	validation_judgement_targeted	dbNSFP_LRT_pred	dbNSFP_phastCons100way_vertebrate_rankscore	ACHILLES_Lineage_Results_Top_Genes
KRAS mutant information (KRASMUT)	KRAS		broad.mit.edu	GRCh37	12	25398284	25398284	+	missense_variant	Missense_Mutation	SNP	C	C	T	rs121913529		TCGA-IB-8127-01	TCGA-IB-8127-10			C	T	C	C		Valid	Somatic	Phase_I	WXS	targeted			Illumina GAIIx	69	48	24	0	ENST00000256078.4:c.35G>A	p.Gly12Asp	p.G12D	ENST00000256078	NM_033360.2	12	gGt/gAt	0	1	D	0.71417	Pancreas(8;6 143 191 305 2070 2426 4376 10944 11745 26467 38091 50869)
	KRAS		broad.mit.edu	GRCh37	12	25398285	25398285	+	missense_variant	Missense_Mutation	SNP	C	C	G	rs121913530		TCGA-IB-7652-01	TCGA-IB-7652-10			C	G	C	C		Valid	Somatic	Phase_I	WXS	targeted			Illumina GAIIx	85	8	45	0	ENST00000256078.4:c.34G>C	p.Gly12Arg	p.G12R	ENST00000256078	NM_033360.2	12	Ggt/Cgt	0	1	D	0.71417	Pancreas(8;6 143 191 305 2070 2426 4376 10944 11745 26467 38091 50869)
	KRAS		broad.mit.edu	GRCh37	12	25398284	25398284	+	missense_variant	Missense_Mutation	SNP	C	C	A	rs121913529		TCGA-Q3-A5QY-01	TCGA-Q3-A5QY-10			C	A	C	C		Valid	Somatic	Phase_I	WXS	KRAS_deep			Illumina GAIIx	111	1	22	0	ENST00000256078.4:c.35G>T	p.Gly12Val	p.G12V	ENST00000256078	NM_033360.2	12	gGt/gTt	0	1	D	0.71417	Pancreas(8;6 143 191 305 2070 2426 4376 10944 11745 26467 38091 50869)
	KRAS		broad.mit.edu	GRCh37	12	25398284	25398284	+	missense_variant	Missense_Mutation	SNP	C	C	T	rs121913529		TCGA-HZ-A49I-01	TCGA-HZ-A49I-10			C	T	C	C		Valid	Somatic	Phase_I	WXS	targeted			Illumina GAIIx	101	43	33	0	ENST00000256078.4:c.35G>A	p.Gly12Asp	p.G12D	ENST00000256078	NM_033360.2	12	gGt/gAt	0	1	D	0.71417	Pancreas(8;6 143 191 305 2070 2426 4376 10944 11745 26467 38091 50869)
	KRAS		broad.mit.edu	GRCh37	12	25398284	25398284	+	missense_variant	Missense_Mutation	SNP	C	C	T	rs121913529		TCGA-IB-AAUN-01	TCGA-IB-AAUN-10			C	T	C	C		Valid	Somatic	Phase_I	WXS	KRAS_deep			Illumina GAIIx	221	76	119	0	ENST00000256078.4:c.35G>A	p.Gly12Asp	p.G12D	ENST00000256078	NM_033360.2	12	gGt/gAt	0	1	D	0.71417	Pancreas(8;6 143 191 305 2070 2426 4376 10944 11745 26467 38091 50869)
	KRAS		broad.mit.edu	GRCh37	12	25398284	25398284	+	missense_variant	Missense_Mutation	SNP	C	C	T	rs121913529		TCGA-IB-A7LX-01	TCGA-IB-A7LX-10			C	T	C	C		Valid	Somatic	Phase_I	WXS	KRAS_deep			Illumina GAIIx	222	230	84	0	ENST00000256078.4:c.35G>A	p.Gly12Asp	p.G12D	ENST00000256078	NM_033360.2	12	gGt/gAt	0	1	D	0.71417	Pancreas(8;6 143 191 305 2070 2426 4376 10944 11745 26467 38091 50869)
	KRAS		broad.mit.edu	GRCh37	12	25398284	25398284	+	missense_variant	Missense_Mutation	SNP	C	C	T	rs121913529		TCGA-IB-AAUM-01	TCGA-IB-AAUM-10			C	T	C	C		Valid	Somatic	Phase_I	WXS	KRAS_deep			Illumina GAIIx	308	19	86	0	ENST00000256078.4:c.35G>A	p.Gly12Asp	p.G12D	ENST00000256078	NM_033360.2	12	gGt/gAt	0	1	D	0.71417	Pancreas(8;6 143 191 305 2070 2426 4376 10944 11745 26467 38091 50869)
	KRAS		broad.mit.edu	GRCh37	12	25380275	25380275	+	missense_variant	Missense_Mutation	SNP	T	T	G	rs17851045		TCGA-FB-A5VM-01	TCGA-FB-A5VM-10			T	G	T	T		Valid	Somatic	Phase_I	WXS	KRAS_deep			Illumina GAIIx	235	35	57	0	ENST00000256078.4:c.183A>C	p.Gln61His	p.Q61H	ENST00000256078	NM_033360.2	61	caA/caC	0	1	D	0.71417	Pancreas(8;6 143 191 305 2070 2426 4376 10944 11745 26467 38091 50869)
	KRAS		broad.mit.edu	GRCh37	12	25398285	25398285	+	missense_variant	Missense_Mutation	SNP	C	C	G	rs121913530		TCGA-3A-A9IC-01	TCGA-3A-A9IC-10			C	G	C	C		Valid	Somatic	Phase_I	WXS	KRAS_deep			Illumina GAIIx	216	48	101	0	ENST00000256078.4:c.34G>C	p.Gly12Arg	p.G12R	ENST00000256078	NM_033360.2	12	Ggt/Cgt	0	1	D	0.71417	Pancreas(8;6 143 191 305 2070 2426 4376 10944 11745 26467 38091 50869)
	KRAS		broad.mit.edu	GRCh37	12	25398285	25398285	+	missense_variant	Missense_Mutation	SNP	C	C	G	rs121913530		TCGA-HZ-7919-01	TCGA-HZ-7919-10			C	G	C	C		Valid	Somatic	Phase_I	WXS	targeted			Illumina GAIIx	82	36	14	0	ENST00000256078.4:c.34G>C	p.Gly12Arg	p.G12R	ENST00000256078	NM_033360.2	12	Ggt/Cgt	0	1	D	0.71417	Pancreas(8;6 143 191 305 2070 2426 4376 10944 11745 26467 38091 50869)
	KRAS		broad.mit.edu	GRCh37	12	25398284	25398284	+	missense_variant	Missense_Mutation	SNP	C	C	T	rs121913529		TCGA-IB-7893-01	TCGA-IB-7893-10			C	T	C	C		Valid	Somatic	Phase_I	WXS	KRAS_deep			Illumina GAIIx	107	24	18	0	ENST00000256078.4:c.35G>A	p.Gly12Asp	p.G12D	ENST00000256078	NM_033360.2	12	gGt/gAt	0	1	D	0.71417	Pancreas(8;6 143 191 305 2070 2426 4376 10944 11745 26467 38091 50869)
	KRAS		broad.mit.edu	GRCh37	12	25398284	25398284	+	missense_variant	Missense_Mutation	SNP	C	C	A	rs121913529		TCGA-IB-7644-01	TCGA-IB-7644-10			C	A	C	C		Valid	Somatic	Phase_I	WXS	targeted			Illumina GAIIx	77	15	17	0	ENST00000256078.4:c.35G>T	p.Gly12Val	p.G12V	ENST00000256078	NM_033360.2	12	gGt/gTt	0	1	D	0.71417	Pancreas(8;6 143 191 305 2070 2426 4376 10944 11745 26467 38091 50869)
	KRAS		broad.mit.edu	GRCh37	12	25398284	25398284	+	missense_variant	Missense_Mutation	SNP	C	C	A	rs121913529		TCGA-HZ-A77P-01	TCGA-HZ-A77P-10			C	A	C	C		Valid	Somatic	Phase_I	WXS	KRAS_deep			Illumina GAIIx	116	9	18	0	ENST00000256078.4:c.35G>T	p.Gly12Val	p.G12V	ENST00000256078	NM_033360.2	12	gGt/gTt	0	1	D	0.71417	Pancreas(8;6 143 191 305 2070 2426 4376 10944 11745 26467 38091 50869)
	KRAS		broad.mit.edu	GRCh37	12	25380276	25380276	+	missense_variant	Missense_Mutation	SNP	T	T	C	rs121913240		TCGA-2L-AAQL-01	TCGA-2L-AAQL-11			T	C	T	T		Valid	Somatic	Phase_I	WXS	KRAS_deep			Illumina GAIIx	298	68	102	0	ENST00000256078.4:c.182A>G	p.Gln61Arg	p.Q61R	ENST00000256078	NM_033360.2	61	cAa/cGa	0	1	D	0.71417	Pancreas(8;6 143 191 305 2070 2426 4376 10944 11745 26467 38091 50869)
	KRAS		broad.mit.edu	GRCh37	12	25398285	25398285	+	missense_variant	Missense_Mutation	SNP	C	C	G	rs121913530		TCGA-2J-AABE-01	TCGA-2J-AABE-10			C	G	C	C		Valid	Somatic	Phase_I	WXS	targeted			Illumina GAIIx	163	28	57	0	ENST00000256078.4:c.34G>C	p.Gly12Arg	p.G12R	ENST00000256078	NM_033360.2	12	Ggt/Cgt	0	1	D	0.71417	Pancreas(8;6 143 191 305 2070 2426 4376 10944 11745 26467 38091 50869)
	KRAS		broad.mit.edu	GRCh37	12	25398284	25398284	+	missense_variant	Missense_Mutation	SNP	C	C	T	rs121913529		TCGA-IB-A5SO-01	TCGA-IB-A5SO-10			C	T	C	C		Valid	Somatic	Phase_I	WXS	KRAS_deep			Illumina GAIIx	77	9	26	0	ENST00000256078.4:c.35G>A	p.Gly12Asp	p.G12D	ENST00000256078	NM_033360.2	12	gGt/gAt	0	1	D	0.71417	Pancreas(8;6 143 191 305 2070 2426 4376 10944 11745 26467 38091 50869)
	KRAS		broad.mit.edu	GRCh37	12	25398285	25398285	+	missense_variant	Missense_Mutation	SNP	C	C	A	rs121913530		TCGA-IB-7886-01	TCGA-IB-7886-10			C	A	C	C		Valid	Somatic	Phase_I	WXS	KRAS_deep			Illumina GAIIx	66	157	14	0	ENST00000256078.4:c.34G>T	p.Gly12Cys	p.G12C	ENST00000256078	NM_033360.2	12	Ggt/Tgt	0	1	D	0.71417	Pancreas(8;6 143 191 305 2070 2426 4376 10944 11745 26467 38091 50869)
	KRAS		broad.mit.edu	GRCh37	12	25398284	25398284	+	missense_variant	Missense_Mutation	SNP	C	C	T	rs121913529		TCGA-IB-AAUP-01	TCGA-IB-AAUP-10			C	T	C	C		Valid	Somatic	Phase_I	WXS	KRAS_deep			Illumina GAIIx	326	13	70	0	ENST00000256078.4:c.35G>A	p.Gly12Asp	p.G12D	ENST00000256078	NM_033360.2	12	gGt/gAt	0	1	D	0.71417	Pancreas(8;6 143 191 305 2070 2426 4376 10944 11745 26467 38091 50869)
	KRAS		broad.mit.edu	GRCh37	12	25398284	25398284	+	missense_variant	Missense_Mutation	SNP	C	C	T	rs121913529		TCGA-FB-AAPQ-01	TCGA-FB-AAPQ-11			C	T	C	C		Valid	Somatic	Phase_I	WXS	RNA			Illumina GAIIx	142	45	102	0	ENST00000256078.4:c.35G>A	p.Gly12Asp	p.G12D	ENST00000256078	NM_033360.2	12	gGt/gAt	0		D	0.71417	Pancreas(8;6 143 191 305 2070 2426 4376 10944 11745 26467 38091 50869)
	KRAS		broad.mit.edu	GRCh37	12	25398284	25398284	+	missense_variant	Missense_Mutation	SNP	C	C	T	rs121913529		TCGA-F2-A7TX-01	TCGA-F2-A7TX-10			C	T	C	C		Valid	Somatic	Phase_I	WXS	KRAS_deep			Illumina GAIIx	273	51	122	0	ENST00000256078.4:c.35G>A	p.Gly12Asp	p.G12D	ENST00000256078	NM_033360.2	12	gGt/gAt	0	1	D	0.71417	Pancreas(8;6 143 191 305 2070 2426 4376 10944 11745 26467 38091 50869)
	KRAS		broad.mit.edu	GRCh37	12	25398284	25398284	+	missense_variant	Missense_Mutation	SNP	C	C	A	rs121913529		TCGA-Q3-AA2A-01	TCGA-Q3-AA2A-10			C	A	C	C		Valid	Somatic	Phase_I	WXS	KRAS_deep			Illumina GAIIx	241	109	55	0	ENST00000256078.4:c.35G>T	p.Gly12Val	p.G12V	ENST00000256078	NM_033360.2	12	gGt/gTt	0	1	D	0.71417	Pancreas(8;6 143 191 305 2070 2426 4376 10944 11745 26467 38091 50869)
	KRAS		broad.mit.edu	GRCh37	12	25398284	25398284	+	missense_variant	Missense_Mutation	SNP	C	C	A	rs121913529		TCGA-YY-A8LH-01	TCGA-YY-A8LH-10			C	A	C	C		Valid	Somatic	Phase_I	WXS	KRAS_deep			Illumina GAIIx	237	97	95	0	ENST00000256078.4:c.35G>T	p.Gly12Val	p.G12V	ENST00000256078	NM_033360.2	12	gGt/gTt	0	1	D	0.71417	Pancreas(8;6 143 191 305 2070 2426 4376 10944 11745 26467 38091 50869)
	KRAS		broad.mit.edu	GRCh37	12	25398284	25398284	+	missense_variant	Missense_Mutation	SNP	C	C	A	rs121913529		TCGA-HV-A5A4-01	TCGA-HV-A5A4-10			C	A	C	C		Valid	Somatic	Phase_I	WXS	KRAS_deep			Illumina GAIIx	79	66	6	0	ENST00000256078.4:c.35G>T	p.Gly12Val	p.G12V	ENST00000256078	NM_033360.2	12	gGt/gTt	0	1	D	0.71417	Pancreas(8;6 143 191 305 2070 2426 4376 10944 11745 26467 38091 50869)
	KRAS		broad.mit.edu	GRCh37	12	25398284	25398284	+	missense_variant	Missense_Mutation	SNP	C	C	T	rs121913529		TCGA-2J-AAB1-01	TCGA-2J-AAB1-10			C	T	C	C		Valid	Somatic	Phase_I	WXS	targeted			Illumina GAIIx	199	8	53	0	ENST00000256078.4:c.35G>A	p.Gly12Asp	p.G12D	ENST00000256078	NM_033360.2	12	gGt/gAt	0	1	D	0.71417	Pancreas(8;6 143 191 305 2070 2426 4376 10944 11745 26467 38091 50869)
	KRAS		broad.mit.edu	GRCh37	12	25398284	25398284	+	missense_variant	Missense_Mutation	SNP	C	C	A	rs121913529		TCGA-S4-A8RM-01	TCGA-S4-A8RM-10			C	A	C	C		Valid	Somatic	Phase_I	WXS	KRAS_deep			Illumina GAIIx	228	82	51	0	ENST00000256078.4:c.35G>T	p.Gly12Val	p.G12V	ENST00000256078	NM_033360.2	12	gGt/gTt	0	1	D	0.71417	Pancreas(8;6 143 191 305 2070 2426 4376 10944 11745 26467 38091 50869)
	KRAS		broad.mit.edu	GRCh37	12	25398284	25398284	+	missense_variant	Missense_Mutation	SNP	C	C	A	rs121913529		TCGA-H6-8124-01	TCGA-H6-8124-10			C	A	C	C		Valid	Somatic	Phase_I	WXS	KRAS_deep			Illumina GAIIx	27	61	15	0	ENST00000256078.4:c.35G>T	p.Gly12Val	p.G12V	ENST00000256078	NM_033360.2	12	gGt/gTt	0	1	D	0.71417	Pancreas(8;6 143 191 305 2070 2426 4376 10944 11745 26467 38091 50869)
	KRAS		broad.mit.edu	GRCh37	12	25398285	25398285	+	missense_variant	Missense_Mutation	SNP	C	C	G	rs121913530		TCGA-2J-AABU-01	TCGA-2J-AABU-10			C	G	C	C		Valid	Somatic	Phase_I	WXS	targeted			Illumina GAIIx	146	80	84	0	ENST00000256078.4:c.34G>C	p.Gly12Arg	p.G12R	ENST00000256078	NM_033360.2	12	Ggt/Cgt	0	1	D	0.71417	Pancreas(8;6 143 191 305 2070 2426 4376 10944 11745 26467 38091 50869)
	KRAS		broad.mit.edu	GRCh37	12	25398284	25398284	+	missense_variant	Missense_Mutation	SNP	C	C	T	rs121913529		TCGA-IB-7651-01	TCGA-IB-7651-10			C	T	C	C		Valid	Somatic	Phase_I	WXS	targeted			Illumina GAIIx	89	13	17	0	ENST00000256078.4:c.35G>A	p.Gly12Asp	p.G12D	ENST00000256078	NM_033360.2	12	gGt/gAt	0	1	D	0.71417	Pancreas(8;6 143 191 305 2070 2426 4376 10944 11745 26467 38091 50869)
	KRAS		broad.mit.edu	GRCh37	12	25380276	25380276	+	missense_variant	Missense_Mutation	SNP	T	T	C	rs121913240		TCGA-IB-7890-01	TCGA-IB-7890-10			T	C	T	T		Valid	Somatic	Phase_I	WXS	KRAS_deep			Illumina GAIIx	305	131	53	0	ENST00000256078.4:c.182A>G	p.Gln61Arg	p.Q61R	ENST00000256078	NM_033360.2	61	cAa/cGa	0	1	D	0.71417	Pancreas(8;6 143 191 305 2070 2426 4376 10944 11745 26467 38091 50869)
	KRAS		broad.mit.edu	GRCh37	12	25398284	25398284	+	missense_variant	Missense_Mutation	SNP	C	C	T	rs121913529		TCGA-HV-A5A6-01	TCGA-HV-A5A6-10			C	T	C	C		Valid	Somatic	Phase_I	WXS	KRAS_deep			Illumina GAIIx	57	33	12	0	ENST00000256078.4:c.35G>A	p.Gly12Asp	p.G12D	ENST00000256078	NM_033360.2	12	gGt/gAt	0	1	D	0.71417	Pancreas(8;6 143 191 305 2070 2426 4376 10944 11745 26467 38091 50869)
	KRAS		broad.mit.edu	GRCh37	12	25398284	25398284	+	missense_variant	Missense_Mutation	SNP	C	C	T	rs121913529		TCGA-HZ-A4BK-01	TCGA-HZ-A4BK-10			C	T	C	C		Valid	Somatic	Phase_I	WXS	targeted			Illumina GAIIx	81	37	13	0	ENST00000256078.4:c.35G>A	p.Gly12Asp	p.G12D	ENST00000256078	NM_033360.2	12	gGt/gAt	0	1	D	0.71417	Pancreas(8;6 143 191 305 2070 2426 4376 10944 11745 26467 38091 50869)
	KRAS		broad.mit.edu	GRCh37	12	25398284	25398284	+	missense_variant	Missense_Mutation	SNP	C	C	T	rs121913529		TCGA-FB-AAPY-01	TCGA-FB-AAPY-11			C	T	C	C		Valid	Somatic	Phase_I	WXS	targeted			Illumina GAIIx	190	22	61	1	ENST00000256078.4:c.35G>A	p.Gly12Asp	p.G12D	ENST00000256078	NM_033360.2	12	gGt/gAt	0	1	D	0.71417	Pancreas(8;6 143 191 305 2070 2426 4376 10944 11745 26467 38091 50869)
	KRAS		broad.mit.edu	GRCh37	12	25398284	25398284	+	missense_variant	Missense_Mutation	SNP	C	C	T	rs121913529		TCGA-IB-A6UG-01	TCGA-IB-A6UG-10			C	T	C	C		Valid	Somatic	Phase_I	WXS	KRAS_deep			Illumina GAIIx	117	13	20	0	ENST00000256078.4:c.35G>A	p.Gly12Asp	p.G12D	ENST00000256078	NM_033360.2	12	gGt/gAt	0	1	D	0.71417	Pancreas(8;6 143 191 305 2070 2426 4376 10944 11745 26467 38091 50869)
	KRAS		broad.mit.edu	GRCh37	12	25398284	25398284	+	missense_variant	Missense_Mutation	SNP	C	C	A	rs121913529		TCGA-HZ-A49H-01	TCGA-HZ-A49H-10			C	A	C	C		Valid	Somatic	Phase_I	WXS	KRAS_deep			Illumina GAIIx	98	15	10	0	ENST00000256078.4:c.35G>T	p.Gly12Val	p.G12V	ENST00000256078	NM_033360.2	12	gGt/gTt	0	1	D	0.71417	Pancreas(8;6 143 191 305 2070 2426 4376 10944 11745 26467 38091 50869)
	KRAS		broad.mit.edu	GRCh37	12	25398284	25398284	+	missense_variant	Missense_Mutation	SNP	C	C	A	rs121913529		TCGA-2J-AABK-01	TCGA-2J-AABK-10			C	A	C	C		Valid	Somatic	Phase_I	WXS	targeted			Illumina GAIIx	169	15	60	0	ENST00000256078.4:c.35G>T	p.Gly12Val	p.G12V	ENST00000256078	NM_033360.2	12	gGt/gTt	0	1	D	0.71417	Pancreas(8;6 143 191 305 2070 2426 4376 10944 11745 26467 38091 50869)
	KRAS		broad.mit.edu	GRCh37	12	25398284	25398284	+	missense_variant	Missense_Mutation	SNP	C	C	T	rs121913529		TCGA-3A-A9IZ-01	TCGA-3A-A9IZ-10			C	T	C	C		Valid	Somatic	Phase_I	WXS	targeted			Illumina GAIIx	151	56	59	0	ENST00000256078.4:c.35G>A	p.Gly12Asp	p.G12D	ENST00000256078	NM_033360.2	12	gGt/gAt	0	1	D	0.71417	Pancreas(8;6 143 191 305 2070 2426 4376 10944 11745 26467 38091 50869)
	KRAS		broad.mit.edu	GRCh37	12	25398284	25398284	+	missense_variant	Missense_Mutation	SNP	C	C	T	rs121913529		TCGA-HV-AA8X-01	TCGA-HV-AA8X-10			C	T	C	C		Valid	Somatic	Phase_I	WXS	KRAS_deep			Illumina GAIIx	156	50	37	0	ENST00000256078.4:c.35G>A	p.Gly12Asp	p.G12D	ENST00000256078	NM_033360.2	12	gGt/gAt	0	1	D	0.71417	Pancreas(8;6 143 191 305 2070 2426 4376 10944 11745 26467 38091 50869)
	KRAS		broad.mit.edu	GRCh37	12	25398284	25398284	+	missense_variant	Missense_Mutation	SNP	C	C	A	rs121913529		TCGA-2J-AABV-01	TCGA-2J-AABV-10			C	A	C	C		Valid	Somatic	Phase_I	WXS	targeted			Illumina GAIIx	220	11	90	0	ENST00000256078.4:c.35G>T	p.Gly12Val	p.G12V	ENST00000256078	NM_033360.2	12	gGt/gTt	0	1	D	0.71417	Pancreas(8;6 143 191 305 2070 2426 4376 10944 11745 26467 38091 50869)
	KRAS		broad.mit.edu	GRCh37	12	25398284	25398284	+	missense_variant	Missense_Mutation	SNP	C	C	T	rs121913529		TCGA-YB-A89D-01	TCGA-YB-A89D-10			C	T	C	C		Valid	Somatic	Phase_I	WXS	KRAS_deep			Illumina GAIIx	397	6	85	0	ENST00000256078.4:c.35G>A	p.Gly12Asp	p.G12D	ENST00000256078	NM_033360.2	12	gGt/gAt	0	1	D	0.71417	Pancreas(8;6 143 191 305 2070 2426 4376 10944 11745 26467 38091 50869)
	KRAS		broad.mit.edu	GRCh37	12	25398284	25398284	+	missense_variant	Missense_Mutation	SNP	C	C	T	rs121913529		TCGA-HZ-8002-01	TCGA-HZ-8002-10			C	T	C	C		Valid	Somatic	Phase_I	WXS	KRAS_deep			Illumina GAIIx	113	9	24	0	ENST00000256078.4:c.35G>A	p.Gly12Asp	p.G12D	ENST00000256078	NM_033360.2	12	gGt/gAt	0	1	D	0.71417	Pancreas(8;6 143 191 305 2070 2426 4376 10944 11745 26467 38091 50869)
	KRAS		broad.mit.edu	GRCh37	12	25398284	25398284	+	missense_variant	Missense_Mutation	SNP	C	C	T	rs121913529		TCGA-FB-A4P5-01	TCGA-FB-A4P5-10			C	T	C	C		Valid	Somatic	Phase_I	WXS	KRAS_deep			Illumina GAIIx	91	2	15	0	ENST00000256078.4:c.35G>A	p.Gly12Asp	p.G12D	ENST00000256078	NM_033360.2	12	gGt/gAt	0	1	D	0.71417	Pancreas(8;6 143 191 305 2070 2426 4376 10944 11745 26467 38091 50869)
	KRAS		broad.mit.edu	GRCh37	12	25398284	25398284	+	missense_variant	Missense_Mutation	SNP	C	C	A	rs121913529		TCGA-IB-7885-01	TCGA-IB-7885-10			C	A	C	C		Valid	Somatic	Phase_I	WXS	targeted			Illumina GAIIx	88	7	38	0	ENST00000256078.4:c.35G>T	p.Gly12Val	p.G12V	ENST00000256078	NM_033360.2	12	gGt/gTt	0	1	D	0.71417	Pancreas(8;6 143 191 305 2070 2426 4376 10944 11745 26467 38091 50869)
	KRAS		broad.mit.edu	GRCh37	12	25398284	25398284	+	missense_variant	Missense_Mutation	SNP	C	C	T	rs121913529		TCGA-IB-7897-01	TCGA-IB-7897-10			C	T	C	C		Valid	Somatic	Phase_I	WXS	KRAS_deep			Illumina GAIIx	173	1	20	0	ENST00000256078.4:c.35G>A	p.Gly12Asp	p.G12D	ENST00000256078	NM_033360.2	12	gGt/gAt	0	1	D	0.71417	Pancreas(8;6 143 191 305 2070 2426 4376 10944 11745 26467 38091 50869)
	KRAS		broad.mit.edu	GRCh37	12	25398284	25398284	+	missense_variant	Missense_Mutation	SNP	C	C	T	rs121913529		TCGA-IB-A7M4-01	TCGA-IB-A7M4-10			C	T	C	C		Valid	Somatic	Phase_I	WXS	KRAS_deep			Illumina GAIIx	289	81	89	0	ENST00000256078.4:c.35G>A	p.Gly12Asp	p.G12D	ENST00000256078	NM_033360.2	12	gGt/gAt	0	1	D	0.71417	Pancreas(8;6 143 191 305 2070 2426 4376 10944 11745 26467 38091 50869)
	KRAS		broad.mit.edu	GRCh37	12	25398284	25398284	+	missense_variant	Missense_Mutation	SNP	C	C	A	rs121913529		TCGA-H6-A45N-01	TCGA-H6-A45N-10			C	A	C	C		Valid	Somatic	Phase_I	WXS	KRAS_deep			Illumina GAIIx	92	5	10	0	ENST00000256078.4:c.35G>T	p.Gly12Val	p.G12V	ENST00000256078	NM_033360.2	12	gGt/gTt	0	1	D	0.71417	Pancreas(8;6 143 191 305 2070 2426 4376 10944 11745 26467 38091 50869)
	KRAS		broad.mit.edu	GRCh37	12	25398285	25398285	+	missense_variant	Missense_Mutation	SNP	C	C	G	rs121913530		TCGA-XD-AAUL-01	TCGA-XD-AAUL-10			C	G	C	C		Valid	Somatic	Phase_I	WXS	KRAS_deep			Illumina GAIIx	271	34	99	0	ENST00000256078.4:c.34G>C	p.Gly12Arg	p.G12R	ENST00000256078	NM_033360.2	12	Ggt/Cgt	0	1	D	0.71417	Pancreas(8;6 143 191 305 2070 2426 4376 10944 11745 26467 38091 50869)
	KRAS		broad.mit.edu	GRCh37	12	25398284	25398284	+	missense_variant	Missense_Mutation	SNP	C	C	T	rs121913529		TCGA-HZ-A8P1-01	TCGA-HZ-A8P1-10			C	T	C	C		Valid	Somatic	Phase_I	WXS	KRAS_deep			Illumina GAIIx	183	73	84	0	ENST00000256078.4:c.35G>A	p.Gly12Asp	p.G12D	ENST00000256078	NM_033360.2	12	gGt/gAt	0	1	D	0.71417	Pancreas(8;6 143 191 305 2070 2426 4376 10944 11745 26467 38091 50869)
	KRAS		broad.mit.edu	GRCh37	12	25380275	25380275	+	missense_variant	Missense_Mutation	SNP	T	T	A	rs17851045		TCGA-HZ-A8P0-01	TCGA-HZ-A8P0-10			T	A	T	T		Valid	Somatic	Phase_I	WXS	KRAS_deep			Illumina GAIIx	280	72	68	0	ENST00000256078.4:c.183A>T	p.Gln61His	p.Q61H	ENST00000256078	NM_033360.2	61	caA/caT	0	1	D	0.71417	Pancreas(8;6 143 191 305 2070 2426 4376 10944 11745 26467 38091 50869)
	KRAS		broad.mit.edu	GRCh37	12	25398284	25398284	+	missense_variant	Missense_Mutation	SNP	C	C	T	rs121913529		TCGA-3A-A9IB-01	TCGA-3A-A9IB-10			C	T	C	C		Valid	Somatic	Phase_I	WXS	KRAS_deep			Illumina GAIIx	244	66	65	0	ENST00000256078.4:c.35G>A	p.Gly12Asp	p.G12D	ENST00000256078	NM_033360.2	12	gGt/gAt	0	1	D	0.71417	Pancreas(8;6 143 191 305 2070 2426 4376 10944 11745 26467 38091 50869)
	KRAS		broad.mit.edu	GRCh37	12	25398284	25398284	+	missense_variant	Missense_Mutation	SNP	C	C	A	rs121913529		TCGA-FB-A545-01	TCGA-FB-A545-10			C	A	C	C		Valid	Somatic	Phase_I	WXS	KRAS_deep			Illumina GAIIx	67	38	13	0	ENST00000256078.4:c.35G>T	p.Gly12Val	p.G12V	ENST00000256078	NM_033360.2	12	gGt/gTt	0	1	D	0.71417	Pancreas(8;6 143 191 305 2070 2426 4376 10944 11745 26467 38091 50869)
	KRAS		broad.mit.edu	GRCh37	12	25398284	25398284	+	missense_variant	Missense_Mutation	SNP	C	C	A	rs121913529		TCGA-FB-AAQ6-01	TCGA-FB-AAQ6-11								Untested	Somatic	Phase_I	WXS	none			Illumina GAIIx	170	48	100	0	ENST00000256078.4:c.35G>T	p.Gly12Val	p.G12V	ENST00000256078	NM_033360.2	12	gGt/gTt	0		D	0.71417	Pancreas(8;6 143 191 305 2070 2426 4376 10944 11745 26467 38091 50869)
	KRAS		broad.mit.edu	GRCh37	12	25398284	25398284	+	missense_variant	Missense_Mutation	SNP	C	C	T	rs121913529		TCGA-IB-A5ST-01	TCGA-IB-A5ST-10			C	T	C	C		Valid	Somatic	Phase_I	WXS	KRAS_deep			Illumina GAIIx	93	4	18	0	ENST00000256078.4:c.35G>A	p.Gly12Asp	p.G12D	ENST00000256078	NM_033360.2	12	gGt/gAt	0	1	D	0.71417	Pancreas(8;6 143 191 305 2070 2426 4376 10944 11745 26467 38091 50869)
	KRAS		broad.mit.edu	GRCh37	12	25398284	25398284	+	missense_variant	Missense_Mutation	SNP	C	C	T	rs121913529		TCGA-HZ-A49G-01	TCGA-HZ-A49G-10			C	T	C	C		Valid	Somatic	Phase_I	WXS	KRAS_deep			Illumina GAIIx	131	12	15	0	ENST00000256078.4:c.35G>A	p.Gly12Asp	p.G12D	ENST00000256078	NM_033360.2	12	gGt/gAt	0	1	D	0.71417	Pancreas(8;6 143 191 305 2070 2426 4376 10944 11745 26467 38091 50869)
	KRAS		broad.mit.edu	GRCh37	12	25398284	25398284	+	missense_variant	Missense_Mutation	SNP	C	C	T	rs121913529		TCGA-3A-A9I7-01	TCGA-3A-A9I7-10			C	T	C	C		Valid	Somatic	Phase_I	WXS	KRAS_deep			Illumina GAIIx	295	23	111	0	ENST00000256078.4:c.35G>A	p.Gly12Asp	p.G12D	ENST00000256078	NM_033360.2	12	gGt/gAt	0	1	D	0.71417	Pancreas(8;6 143 191 305 2070 2426 4376 10944 11745 26467 38091 50869)
	KRAS		broad.mit.edu	GRCh37	12	25398284	25398284	+	missense_variant	Missense_Mutation	SNP	C	C	T	rs121913529		TCGA-US-A774-01	TCGA-US-A774-11			C	T	C	C		Valid	Somatic	Phase_I	WXS	KRAS_deep			Illumina GAIIx	96	5	15	0	ENST00000256078.4:c.35G>A	p.Gly12Asp	p.G12D	ENST00000256078	NM_033360.2	12	gGt/gAt	0	1	D	0.71417	Pancreas(8;6 143 191 305 2070 2426 4376 10944 11745 26467 38091 50869)
	KRAS		broad.mit.edu	GRCh37	12	25398285	25398285	+	missense_variant	Missense_Mutation	SNP	C	C	G	rs121913530		TCGA-3A-A9I9-01	TCGA-3A-A9I9-10			C	G	C	C		Valid	Somatic	Phase_I	WXS	KRAS_deep			Illumina GAIIx	286	36	106	0	ENST00000256078.4:c.34G>C	p.Gly12Arg	p.G12R	ENST00000256078	NM_033360.2	12	Ggt/Cgt	0	1	D	0.71417	Pancreas(8;6 143 191 305 2070 2426 4376 10944 11745 26467 38091 50869)
	KRAS		broad.mit.edu	GRCh37	12	25398284	25398284	+	missense_variant	Missense_Mutation	SNP	C	C	A	rs121913529		TCGA-Z5-AAPL-01	TCGA-Z5-AAPL-10			C	A	C	C		Valid	Somatic	Phase_I	WXS	targeted			Illumina GAIIx	213	5	60	0	ENST00000256078.4:c.35G>T	p.Gly12Val	p.G12V	ENST00000256078	NM_033360.2	12	gGt/gTt	0	1	D	0.71417	Pancreas(8;6 143 191 305 2070 2426 4376 10944 11745 26467 38091 50869)
	KRAS		broad.mit.edu	GRCh37	12	25398284	25398284	+	missense_variant	Missense_Mutation	SNP	C	C	T	rs121913529		TCGA-IB-8126-01	TCGA-IB-8126-10								Untested	Somatic	Phase_I	WXS	none			Illumina GAIIx	80	0	25	0	ENST00000256078.4:c.35G>A	p.Gly12Asp	p.G12D	ENST00000256078	NM_033360.2	12	gGt/gAt	0		D	0.71417	Pancreas(8;6 143 191 305 2070 2426 4376 10944 11745 26467 38091 50869)
	KRAS		broad.mit.edu	GRCh37	12	25398285	25398285	+	missense_variant	Missense_Mutation	SNP	C	C	G	rs121913530		TCGA-IB-AAUU-01	TCGA-IB-AAUU-10			C	G	C	C		Valid	Somatic	Phase_I	WXS	KRAS_deep			Illumina GAIIx	233	70	67	0	ENST00000256078.4:c.34G>C	p.Gly12Arg	p.G12R	ENST00000256078	NM_033360.2	12	Ggt/Cgt	0	1	D	0.71417	Pancreas(8;6 143 191 305 2070 2426 4376 10944 11745 26467 38091 50869)
	KRAS		broad.mit.edu	GRCh37	12	25398284	25398284	+	missense_variant	Missense_Mutation	SNP	C	C	A	rs121913529		TCGA-HZ-7925-01	TCGA-HZ-7925-10			C	A	C	C		Valid	Somatic	Phase_I	WXS	KRAS_deep			Illumina GAIIx	113	14	28	0	ENST00000256078.4:c.35G>T	p.Gly12Val	p.G12V	ENST00000256078	NM_033360.2	12	gGt/gTt	0	1	D	0.71417	Pancreas(8;6 143 191 305 2070 2426 4376 10944 11745 26467 38091 50869)
	KRAS		broad.mit.edu	GRCh37	12	25398284	25398284	+	missense_variant	Missense_Mutation	SNP	C	C	A	rs121913529		TCGA-F2-6879-01	TCGA-F2-6879-10			C	A	C	C		Valid	Somatic	Phase_I	WXS	targeted			Illumina GAIIx	52	43	21	0	ENST00000256078.4:c.35G>T	p.Gly12Val	p.G12V	ENST00000256078	NM_033360.2	12	gGt/gTt	0	1	D	0.71417	Pancreas(8;6 143 191 305 2070 2426 4376 10944 11745 26467 38091 50869)
	KRAS		broad.mit.edu	GRCh37	12	25398285	25398285	+	missense_variant	Missense_Mutation	SNP	C	C	G	rs121913530		TCGA-2J-AAB8-01	TCGA-2J-AAB8-10			C	G	C	C		Valid	Somatic	Phase_I	WXS	targeted			Illumina GAIIx	188	18	73	0	ENST00000256078.4:c.34G>C	p.Gly12Arg	p.G12R	ENST00000256078	NM_033360.2	12	Ggt/Cgt	0	1	D	0.71417	Pancreas(8;6 143 191 305 2070 2426 4376 10944 11745 26467 38091 50869)
	KRAS		broad.mit.edu	GRCh37	12	25398285	25398285	+	missense_variant	Missense_Mutation	SNP	C	C	G	rs121913530		TCGA-HZ-A77Q-01	TCGA-HZ-A77Q-10			C	G	C	C		Valid	Somatic	Phase_I	WXS	KRAS_deep			Illumina GAIIx	292	22	72	0	ENST00000256078.4:c.34G>C	p.Gly12Arg	p.G12R	ENST00000256078	NM_033360.2	12	Ggt/Cgt	0	1	D	0.71417	Pancreas(8;6 143 191 305 2070 2426 4376 10944 11745 26467 38091 50869)
	KRAS		broad.mit.edu	GRCh37	12	25398284	25398284	+	missense_variant	Missense_Mutation	SNP	C	C	T	rs121913529		TCGA-IB-7646-01	TCGA-IB-7646-10			C	T	C	C		Valid	Somatic	Phase_I	WXS	targeted			Illumina GAIIx	82	22	12	0	ENST00000256078.4:c.35G>A	p.Gly12Asp	p.G12D	ENST00000256078	NM_033360.2	12	gGt/gAt	0	1	D	0.71417	Pancreas(8;6 143 191 305 2070 2426 4376 10944 11745 26467 38091 50869)
	KRAS		broad.mit.edu	GRCh37	12	25398284	25398284	+	missense_variant	Missense_Mutation	SNP	C	C	T	rs121913529		TCGA-F2-A44G-01	TCGA-F2-A44G-10			C	T	C	C		Valid	Somatic	Phase_I	WXS	KRAS_deep			Illumina GAIIx	100	17	25	0	ENST00000256078.4:c.35G>A	p.Gly12Asp	p.G12D	ENST00000256078	NM_033360.2	12	gGt/gAt	0	1	D	0.71417	Pancreas(8;6 143 191 305 2070 2426 4376 10944 11745 26467 38091 50869)
	KRAS		broad.mit.edu	GRCh37	12	25398284	25398284	+	missense_variant	Missense_Mutation	SNP	C	C	T	rs121913529		TCGA-2L-AAQE-01	TCGA-2L-AAQE-11			C	T	C	C		Valid	Somatic	Phase_I	WXS	KRAS_deep			Illumina GAIIx	173	72	79	0	ENST00000256078.4:c.35G>A	p.Gly12Asp	p.G12D	ENST00000256078	NM_033360.2	12	gGt/gAt	0	1	D	0.71417	Pancreas(8;6 143 191 305 2070 2426 4376 10944 11745 26467 38091 50869)
	KRAS		broad.mit.edu	GRCh37	12	25398284	25398284	+	missense_variant	Missense_Mutation	SNP	C	C	T	rs121913529		TCGA-HV-A7OL-01	TCGA-HV-A7OL-10			C	T	C	C		Valid	Somatic	Phase_I	WXS	KRAS_deep			Illumina GAIIx	84	27	15	0	ENST00000256078.4:c.35G>A	p.Gly12Asp	p.G12D	ENST00000256078	NM_033360.2	12	gGt/gAt	0	1	D	0.71417	Pancreas(8;6 143 191 305 2070 2426 4376 10944 11745 26467 38091 50869)
	KRAS		broad.mit.edu	GRCh37	12	25398285	25398285	+	missense_variant	Missense_Mutation	SNP	C	C	G	rs121913530		TCGA-IB-7887-01	TCGA-IB-7887-10			C	G	C	C		Valid	Somatic	Phase_I	WXS	KRAS_deep			Illumina GAIIx	132	20	23	1	ENST00000256078.4:c.34G>C	p.Gly12Arg	p.G12R	ENST00000256078	NM_033360.2	12	Ggt/Cgt	0	1	D	0.71417	Pancreas(8;6 143 191 305 2070 2426 4376 10944 11745 26467 38091 50869)
	KRAS		broad.mit.edu	GRCh37	12	25398284	25398284	+	missense_variant	Missense_Mutation	SNP	C	C	T	rs121913529		TCGA-IB-AAUS-01	TCGA-IB-AAUS-10			C	T	C	C		Valid	Somatic	Phase_I	WXS	KRAS_deep			Illumina GAIIx	320	6	108	0	ENST00000256078.4:c.35G>A	p.Gly12Asp	p.G12D	ENST00000256078	NM_033360.2	12	gGt/gAt	0	1	D	0.71417	Pancreas(8;6 143 191 305 2070 2426 4376 10944 11745 26467 38091 50869)
	KRAS		broad.mit.edu	GRCh37	12	25398284	25398284	+	missense_variant	Missense_Mutation	SNP	C	C	T	rs121913529		TCGA-M8-A5N4-01	TCGA-M8-A5N4-10			C	T	C	C		Valid	Somatic	Phase_I	WXS	KRAS_deep			Illumina GAIIx	76	7	11	0	ENST00000256078.4:c.35G>A	p.Gly12Asp	p.G12D	ENST00000256078	NM_033360.2	12	gGt/gAt	0	1	D	0.71417	Pancreas(8;6 143 191 305 2070 2426 4376 10944 11745 26467 38091 50869)
	KRAS		broad.mit.edu	GRCh37	12	25398284	25398284	+	missense_variant	Missense_Mutation	SNP	C	C	A	rs121913529		TCGA-2J-AABH-01	TCGA-2J-AABH-10			C	A	C	C		Valid	Somatic	Phase_I	WXS	targeted			Illumina GAIIx	109	26	72	0	ENST00000256078.4:c.35G>T	p.Gly12Val	p.G12V	ENST00000256078	NM_033360.2	12	gGt/gTt	0	1	D	0.71417	Pancreas(8;6 143 191 305 2070 2426 4376 10944 11745 26467 38091 50869)
	KRAS		broad.mit.edu	GRCh37	12	25398285	25398285	+	missense_variant	Missense_Mutation	SNP	C	C	G	rs121913530		TCGA-IB-A6UF-01	TCGA-IB-A6UF-10			C	G	C	C		Valid	Somatic	Phase_I	WXS	KRAS_deep			Illumina GAIIx	112	67	21	0	ENST00000256078.4:c.34G>C	p.Gly12Arg	p.G12R	ENST00000256078	NM_033360.2	12	Ggt/Cgt	0	1	D	0.71417	Pancreas(8;6 143 191 305 2070 2426 4376 10944 11745 26467 38091 50869)
	KRAS		broad.mit.edu	GRCh37	12	25380275	25380275	+	missense_variant	Missense_Mutation	SNP	T	T	G	rs17851045		TCGA-HZ-8005-01	TCGA-HZ-8005-10			T	G	T	T		Valid	Somatic	Phase_I	WXS	KRAS_deep			Illumina GAIIx	283	103	77	0	ENST00000256078.4:c.183A>C	p.Gln61His	p.Q61H	ENST00000256078	NM_033360.2	61	caA/caC	0	1	D	0.71417	Pancreas(8;6 143 191 305 2070 2426 4376 10944 11745 26467 38091 50869)
	KRAS		broad.mit.edu	GRCh37	12	25398284	25398284	+	missense_variant	Missense_Mutation	SNP	C	C	A	rs121913529		TCGA-HZ-8637-01	TCGA-HZ-8637-10			C	A	C	C		Valid	Somatic	Phase_I	WXS	targeted			Illumina GAIIx	88	11	18	0	ENST00000256078.4:c.35G>T	p.Gly12Val	p.G12V	ENST00000256078	NM_033360.2	12	gGt/gTt	0	1	D	0.71417	Pancreas(8;6 143 191 305 2070 2426 4376 10944 11745 26467 38091 50869)
	KRAS		broad.mit.edu	GRCh37	12	25398285	25398285	+	missense_variant	Missense_Mutation	SNP	C	C	G	rs121913530		TCGA-S4-A8RP-01	TCGA-S4-A8RP-10			C	G	C	C		Valid	Somatic	Phase_I	WXS	KRAS_deep			Illumina GAIIx	278	80	46	0	ENST00000256078.4:c.34G>C	p.Gly12Arg	p.G12R	ENST00000256078	NM_033360.2	12	Ggt/Cgt	0	1	D	0.71417	Pancreas(8;6 143 191 305 2070 2426 4376 10944 11745 26467 38091 50869)
	KRAS		broad.mit.edu	GRCh37	12	25398284	25398284	+	missense_variant	Missense_Mutation	SNP	C	C	T	rs121913529		TCGA-IB-AAUQ-01	TCGA-IB-AAUQ-10			C	T	C	C		Valid	Somatic	Phase_I	WXS	targeted			Illumina GAIIx	186	23	84	0	ENST00000256078.4:c.35G>A	p.Gly12Asp	p.G12D	ENST00000256078	NM_033360.2	12	gGt/gAt	0	1	D	0.71417	Pancreas(8;6 143 191 305 2070 2426 4376 10944 11745 26467 38091 50869)
	KRAS		broad.mit.edu	GRCh37	12	25398284	25398284	+	missense_variant	Missense_Mutation	SNP	C	C	A	rs121913529		TCGA-2J-AABR-01	TCGA-2J-AABR-10			C	A	C	C		Valid	Somatic	Phase_I	WXS	targeted			Illumina GAIIx	215	8	67	0	ENST00000256078.4:c.35G>T	p.Gly12Val	p.G12V	ENST00000256078	NM_033360.2	12	gGt/gTt	0	1	D	0.71417	Pancreas(8;6 143 191 305 2070 2426 4376 10944 11745 26467 38091 50869)
	KRAS		broad.mit.edu	GRCh37	12	25398285	25398285	+	missense_variant	Missense_Mutation	SNP	C	C	G	rs121913530		TCGA-FB-AAPZ-01	TCGA-FB-AAPZ-11			C	G	C	C		Valid	Somatic	Phase_I	WXS	targeted			Illumina GAIIx	154	79	76	0	ENST00000256078.4:c.34G>C	p.Gly12Arg	p.G12R	ENST00000256078	NM_033360.2	12	Ggt/Cgt	0	1	D	0.71417	Pancreas(8;6 143 191 305 2070 2426 4376 10944 11745 26467 38091 50869)
	KRAS		broad.mit.edu	GRCh37	12	25398284	25398284	+	missense_variant	Missense_Mutation	SNP	C	C	T	rs121913529		TCGA-FB-AAQ2-01	TCGA-FB-AAQ2-11			C	T	C	C		Valid	Somatic	Phase_I	WXS	targeted			Illumina GAIIx	145	63	60	0	ENST00000256078.4:c.35G>A	p.Gly12Asp	p.G12D	ENST00000256078	NM_033360.2	12	gGt/gAt	0	1	D	0.71417	Pancreas(8;6 143 191 305 2070 2426 4376 10944 11745 26467 38091 50869)
	KRAS		broad.mit.edu	GRCh37	12	25398284	25398284	+	missense_variant	Missense_Mutation	SNP	C	C	T	rs121913529		TCGA-LB-A9Q5-01	TCGA-LB-A9Q5-10			C	T	C	C		Valid	Somatic	Phase_I	WXS	KRAS_deep			Illumina GAIIx	334	16	81	0	ENST00000256078.4:c.35G>A	p.Gly12Asp	p.G12D	ENST00000256078	NM_033360.2	12	gGt/gAt	0	1	D	0.71417	Pancreas(8;6 143 191 305 2070 2426 4376 10944 11745 26467 38091 50869)
	KRAS		broad.mit.edu	GRCh37	12	25398284	25398284	+	missense_variant	Missense_Mutation	SNP	C	C	A	rs121913529		TCGA-YH-A8SY-01	TCGA-YH-A8SY-10			C	A	C	C		Valid	Somatic	Phase_I	WXS	KRAS_deep			Illumina GAIIx	267	74	76	0	ENST00000256078.4:c.35G>T	p.Gly12Val	p.G12V	ENST00000256078	NM_033360.2	12	gGt/gTt	0	1	D	0.71417	Pancreas(8;6 143 191 305 2070 2426 4376 10944 11745 26467 38091 50869)
	KRAS		broad.mit.edu	GRCh37	12	25398284	25398284	+	missense_variant	Missense_Mutation	SNP	C	C	A	rs121913529		TCGA-FB-A4P6-01	TCGA-FB-A4P6-10								Untested	Somatic	Phase_I	WXS	none			Illumina GAIIx	83	0	13	0	ENST00000256078.4:c.35G>T	p.Gly12Val	p.G12V	ENST00000256078	NM_033360.2	12	gGt/gTt	0		D	0.71417	Pancreas(8;6 143 191 305 2070 2426 4376 10944 11745 26467 38091 50869)
	KRAS		broad.mit.edu	GRCh37	12	25398284	25398284	+	missense_variant	Missense_Mutation	SNP	C	C	T	rs121913529		TCGA-2J-AABF-01	TCGA-2J-AABF-10			C	T	C	C		Valid	Somatic	Phase_I	WXS	targeted			Illumina GAIIx	198	23	52	0	ENST00000256078.4:c.35G>A	p.Gly12Asp	p.G12D	ENST00000256078	NM_033360.2	12	gGt/gAt	0	1	D	0.71417	Pancreas(8;6 143 191 305 2070 2426 4376 10944 11745 26467 38091 50869)
	KRAS		broad.mit.edu	GRCh37	12	25398284	25398284	+	missense_variant	Missense_Mutation	SNP	C	C	T	rs121913529		TCGA-3A-A9IX-01	TCGA-3A-A9IX-10			C	T	C	C		Valid	Somatic	Phase_I	WXS	targeted			Illumina GAIIx	201	6	74	0	ENST00000256078.4:c.35G>A	p.Gly12Asp	p.G12D	ENST00000256078	NM_033360.2	12	gGt/gAt	0	1	D	0.71417	Pancreas(8;6 143 191 305 2070 2426 4376 10944 11745 26467 38091 50869)
	KRAS		broad.mit.edu	GRCh37	12	25398285	25398285	+	missense_variant	Missense_Mutation	SNP	C	C	G	rs121913530		TCGA-2J-AABI-01	TCGA-2J-AABI-10			C	G	C	C		Valid	Somatic	Phase_I	WXS	RNA			Illumina GAIIx	175	262	72	1	ENST00000256078.4:c.34G>C	p.Gly12Arg	p.G12R	ENST00000256078	NM_033360.2	12	Ggt/Cgt	0		D	0.71417	Pancreas(8;6 143 191 305 2070 2426 4376 10944 11745 26467 38091 50869)
	KRAS		broad.mit.edu	GRCh37	12	25398284	25398284	+	missense_variant	Missense_Mutation	SNP	C	C	T	rs121913529		TCGA-IB-A5SP-01	TCGA-IB-A5SP-10			C	T	C	C		Valid	Somatic	Phase_I	WXS	KRAS_deep			Illumina GAIIx	35	49	18	0	ENST00000256078.4:c.35G>A	p.Gly12Asp	p.G12D	ENST00000256078	NM_033360.2	12	gGt/gAt	0	1	D	0.71417	Pancreas(8;6 143 191 305 2070 2426 4376 10944 11745 26467 38091 50869)
	KRAS		broad.mit.edu	GRCh37	12	25398284	25398284	+	missense_variant	Missense_Mutation	SNP	C	C	A	rs121913529		TCGA-2J-AABO-01	TCGA-2J-AABO-10			C	A	C	C		Valid	Somatic	Phase_I	WXS	targeted			Illumina GAIIx	169	66	59	0	ENST00000256078.4:c.35G>T	p.Gly12Val	p.G12V	ENST00000256078	NM_033360.2	12	gGt/gTt	0	1	D	0.71417	Pancreas(8;6 143 191 305 2070 2426 4376 10944 11745 26467 38091 50869)
	KRAS		broad.mit.edu	GRCh37	12	25398285	25398285	+	missense_variant	Missense_Mutation	SNP	C	C	G	rs121913530		TCGA-XN-A8T5-01	TCGA-XN-A8T5-10			C	G	C	C		Valid	Somatic	Phase_I	WXS	KRAS_deep			Illumina GAIIx	316	13	75	0	ENST00000256078.4:c.34G>C	p.Gly12Arg	p.G12R	ENST00000256078	NM_033360.2	12	Ggt/Cgt	0	1	D	0.71417	Pancreas(8;6 143 191 305 2070 2426 4376 10944 11745 26467 38091 50869)
	KRAS		broad.mit.edu	GRCh37	12	25398284	25398284	+	missense_variant	Missense_Mutation	SNP	C	C	A	rs121913529		TCGA-3E-AAAZ-01	TCGA-3E-AAAZ-10			C	A	C	C		Valid	Somatic	Phase_I	WXS	KRAS_deep			Illumina GAIIx	306	52	97	0	ENST00000256078.4:c.35G>T	p.Gly12Val	p.G12V	ENST00000256078	NM_033360.2	12	gGt/gTt	0	1	D	0.71417	Pancreas(8;6 143 191 305 2070 2426 4376 10944 11745 26467 38091 50869)
	KRAS		broad.mit.edu	GRCh37	12	25398284	25398284	+	missense_variant	Missense_Mutation	SNP	C	C	A	rs121913529		TCGA-2L-AAQI-01	TCGA-2L-AAQI-11			C	A	C	C		Valid	Somatic	Phase_I	WXS	KRAS_deep			Illumina GAIIx	272	34	56	0	ENST00000256078.4:c.35G>T	p.Gly12Val	p.G12V	ENST00000256078	NM_033360.2	12	gGt/gTt	0	1	D	0.71417	Pancreas(8;6 143 191 305 2070 2426 4376 10944 11745 26467 38091 50869)
	KRAS		broad.mit.edu	GRCh37	12	25398284	25398284	+	missense_variant	Missense_Mutation	SNP	C	C	T	rs121913529		TCGA-FB-AAQ1-01	TCGA-FB-AAQ1-11			C	T	C	C		Valid	Somatic	Phase_I	WXS	targeted			Illumina GAIIx	157	40	57	0	ENST00000256078.4:c.35G>A	p.Gly12Asp	p.G12D	ENST00000256078	NM_033360.2	12	gGt/gAt	0	1	D	0.71417	Pancreas(8;6 143 191 305 2070 2426 4376 10944 11745 26467 38091 50869)
	KRAS		broad.mit.edu	GRCh37	12	25398284	25398284	+	missense_variant	Missense_Mutation	SNP	C	C	T	rs121913529		TCGA-S4-A8RO-01	TCGA-S4-A8RO-10			C	T	C	C		Valid	Somatic	Phase_I	WXS	KRAS_deep			Illumina GAIIx	177	79	51	0	ENST00000256078.4:c.35G>A	p.Gly12Asp	p.G12D	ENST00000256078	NM_033360.2	12	gGt/gAt	0	1	D	0.71417	Pancreas(8;6 143 191 305 2070 2426 4376 10944 11745 26467 38091 50869)
	KRAS		broad.mit.edu	GRCh37	12	25398282	25398282	+	missense_variant	Missense_Mutation	SNP	C	C	A	rs121913535		TCGA-FB-A78T-01	TCGA-FB-A78T-10			C	A	C	C		Valid	Somatic	Phase_I	WXS	KRAS_deep			Illumina GAIIx	82	14	20	0	ENST00000256078.4:c.37G>T	p.Gly13Cys	p.G13C	ENST00000256078	NM_033360.2	13	Ggc/Tgc	0	1	D	0.71417	Pancreas(8;6 143 191 305 2070 2426 4376 10944 11745 26467 38091 50869)
	KRAS		broad.mit.edu	GRCh37	12	25398284	25398284	+	missense_variant	Missense_Mutation	SNP	C	C	T	rs121913529		TCGA-IB-AAUO-01	TCGA-IB-AAUO-10			C	T	C	C		Valid	Somatic	Phase_I	WXS	KRAS_deep			Illumina GAIIx	227	51	107	0	ENST00000256078.4:c.35G>A	p.Gly12Asp	p.G12D	ENST00000256078	NM_033360.2	12	gGt/gAt	0	1	D	0.71417	Pancreas(8;6 143 191 305 2070 2426 4376 10944 11745 26467 38091 50869)
	KRAS		broad.mit.edu	GRCh37	12	25398284	25398284	+	missense_variant	Missense_Mutation	SNP	C	C	A	rs121913529		TCGA-2L-AAQA-01	TCGA-2L-AAQA-11			C	A	C	C		Valid	Somatic	Phase_I	WXS	KRAS_deep			Illumina GAIIx	239	101	129	1	ENST00000256078.4:c.35G>T	p.Gly12Val	p.G12V	ENST00000256078	NM_033360.2	12	gGt/gTt	0	1	D	0.71417	Pancreas(8;6 143 191 305 2070 2426 4376 10944 11745 26467 38091 50869)
	KRAS		broad.mit.edu	GRCh37	12	25380275	25380275	+	missense_variant	Missense_Mutation	SNP	T	T	G	rs17851045		TCGA-IB-7649-01	TCGA-IB-7649-10			T	G	T	T		Valid	Somatic	Phase_I	WXS	targeted			Illumina GAIIx	382	36	49	0	ENST00000256078.4:c.183A>C	p.Gln61His	p.Q61H	ENST00000256078	NM_033360.2	61	caA/caC	0	1	D	0.71417	Pancreas(8;6 143 191 305 2070 2426 4376 10944 11745 26467 38091 50869)
	KRAS		broad.mit.edu	GRCh37	12	25398284	25398284	+	missense_variant	Missense_Mutation	SNP	C	C	T	rs121913529		TCGA-2J-AAB9-01	TCGA-2J-AAB9-10			C	T	C	C		Valid	Somatic	Phase_I	WXS	targeted			Illumina GAIIx	204	8	59	0	ENST00000256078.4:c.35G>A	p.Gly12Asp	p.G12D	ENST00000256078	NM_033360.2	12	gGt/gAt	0	1	D	0.71417	Pancreas(8;6 143 191 305 2070 2426 4376 10944 11745 26467 38091 50869)
	KRAS		broad.mit.edu	GRCh37	12	25398284	25398284	+	missense_variant	Missense_Mutation	SNP	C	C	T	rs121913529		TCGA-HZ-A4BH-01	TCGA-HZ-A4BH-10			C	T	C	C		Valid	Somatic	Phase_I	WXS	targeted			Illumina GAIIx	90	21	10	0	ENST00000256078.4:c.35G>A	p.Gly12Asp	p.G12D	ENST00000256078	NM_033360.2	12	gGt/gAt	0	1	D	0.71417	Pancreas(8;6 143 191 305 2070 2426 4376 10944 11745 26467 38091 50869)
	KRAS		broad.mit.edu	GRCh37	12	25398284	25398284	+	missense_variant	Missense_Mutation	SNP	C	C	A	rs121913529		TCGA-XD-AAUG-01	TCGA-XD-AAUG-10			C	A	C	C		Valid	Somatic	Phase_I	WXS	targeted			Illumina GAIIx	181	8	69	0	ENST00000256078.4:c.35G>T	p.Gly12Val	p.G12V	ENST00000256078	NM_033360.2	12	gGt/gTt	0	1	D	0.71417	Pancreas(8;6 143 191 305 2070 2426 4376 10944 11745 26467 38091 50869)
	KRAS		broad.mit.edu	GRCh37	12	25398284	25398284	+	missense_variant	Missense_Mutation	SNP	C	C	T	rs121913529		TCGA-OE-A75W-01	TCGA-OE-A75W-10			C	T	C	C		Valid	Somatic	Phase_I	WXS	KRAS_deep			Illumina GAIIx	63	30	18	0	ENST00000256078.4:c.35G>A	p.Gly12Asp	p.G12D	ENST00000256078	NM_033360.2	12	gGt/gAt	0	1	D	0.71417	Pancreas(8;6 143 191 305 2070 2426 4376 10944 11745 26467 38091 50869)
	KRAS		broad.mit.edu	GRCh37	12	25398284	25398284	+	missense_variant	Missense_Mutation	SNP	C	C	A	rs121913529		TCGA-HZ-A77O-01	TCGA-HZ-A77O-10			C	A	C	C		Valid	Somatic	Phase_I	WXS	KRAS_deep			Illumina GAIIx	110	27	11	0	ENST00000256078.4:c.35G>T	p.Gly12Val	p.G12V	ENST00000256078	NM_033360.2	12	gGt/gTt	0	1	D	0.71417	Pancreas(8;6 143 191 305 2070 2426 4376 10944 11745 26467 38091 50869)
	KRAS		broad.mit.edu	GRCh37	12	25380275	25380275	+	missense_variant	Missense_Mutation	SNP	T	T	A	rs17851045		TCGA-HZ-7922-01	TCGA-HZ-7922-10			T	A	T	T		Valid	Somatic	Phase_I	WXS	targeted			Illumina GAIIx	285	185	47	0	ENST00000256078.4:c.183A>T	p.Gln61His	p.Q61H	ENST00000256078	NM_033360.2	61	caA/caT	0	1	D	0.71417	Pancreas(8;6 143 191 305 2070 2426 4376 10944 11745 26467 38091 50869)
	KRAS		broad.mit.edu	GRCh37	12	25398285	25398285	+	missense_variant	Missense_Mutation	SNP	C	C	G	rs121913530		TCGA-FB-AAQ0-01	TCGA-FB-AAQ0-11			C	G	C	C		Valid	Somatic	Phase_I	WXS	targeted			Illumina GAIIx	147	54	62	0	ENST00000256078.4:c.34G>C	p.Gly12Arg	p.G12R	ENST00000256078	NM_033360.2	12	Ggt/Cgt	0	1	D	0.71417	Pancreas(8;6 143 191 305 2070 2426 4376 10944 11745 26467 38091 50869)
	KRAS		broad.mit.edu	GRCh37	12	25398284	25398284	+	missense_variant	Missense_Mutation	SNP	C	C	T	rs121913529		TCGA-3A-A9IU-01	TCGA-3A-A9IU-10			C	T	C	C		Valid	Somatic	Phase_I	WXS	KRAS_deep			Illumina GAIIx	223	72	38	0	ENST00000256078.4:c.35G>A	p.Gly12Asp	p.G12D	ENST00000256078	NM_033360.2	12	gGt/gAt	0	1	D	0.71417	Pancreas(8;6 143 191 305 2070 2426 4376 10944 11745 26467 38091 50869)
	KRAS		broad.mit.edu	GRCh37	12	25398284	25398284	+	missense_variant	Missense_Mutation	SNP	C	C	A	rs121913529		TCGA-RB-AA9M-01	TCGA-RB-AA9M-10			C	A	C	C		Valid	Somatic	Phase_I	WXS	KRAS_deep			Illumina GAIIx	311	18	31	0	ENST00000256078.4:c.35G>T	p.Gly12Val	p.G12V	ENST00000256078	NM_033360.2	12	gGt/gTt	0	1	D	0.71417	Pancreas(8;6 143 191 305 2070 2426 4376 10944 11745 26467 38091 50869)
	KRAS		broad.mit.edu	GRCh37	12	25398284	25398284	+	missense_variant	Missense_Mutation	SNP	C	C	T	rs121913529		TCGA-HZ-7926-01	TCGA-HZ-7926-10			C	T	C	C		Valid	Somatic	Phase_I	WXS	KRAS_deep			Illumina GAIIx	108	15	27	0	ENST00000256078.4:c.35G>A	p.Gly12Asp	p.G12D	ENST00000256078	NM_033360.2	12	gGt/gAt	0	1	D	0.71417	Pancreas(8;6 143 191 305 2070 2426 4376 10944 11745 26467 38091 50869)
	KRAS		broad.mit.edu	GRCh37	12	25398285	25398285	+	missense_variant	Missense_Mutation	SNP	C	C	G	rs121913530		TCGA-FB-AAPU-01	TCGA-FB-AAPU-11			C	G	C	C		Valid	Somatic	Phase_I	WXS	targeted			Illumina GAIIx	89	47	48	0	ENST00000256078.4:c.34G>C	p.Gly12Arg	p.G12R	ENST00000256078	NM_033360.2	12	Ggt/Cgt	0	1	D	0.71417	Pancreas(8;6 143 191 305 2070 2426 4376 10944 11745 26467 38091 50869)
	KRAS		broad.mit.edu	GRCh37	12	25398284	25398284	+	missense_variant	Missense_Mutation	SNP	C	C	A	rs121913529		TCGA-HV-AA8V-01	TCGA-HV-AA8V-10			C	A	C	C		Valid	Somatic	Phase_I	WXS	targeted			Illumina GAIIx	172	18	81	0	ENST00000256078.4:c.35G>T	p.Gly12Val	p.G12V	ENST00000256078	NM_033360.2	12	gGt/gTt	0	1	D	0.71417	Pancreas(8;6 143 191 305 2070 2426 4376 10944 11745 26467 38091 50869)
	KRAS		broad.mit.edu	GRCh37	12	25398285	25398285	+	missense_variant	Missense_Mutation	SNP	C	C	G	rs121913530		TCGA-IB-AAUR-01	TCGA-IB-AAUR-10			C	G	C	C		Valid	Somatic	Phase_I	WXS	KRAS_deep			Illumina GAIIx	355	15	145	0	ENST00000256078.4:c.34G>C	p.Gly12Arg	p.G12R	ENST00000256078	NM_033360.2	12	Ggt/Cgt	0	1	D	0.71417	Pancreas(8;6 143 191 305 2070 2426 4376 10944 11745 26467 38091 50869)
	KRAS		broad.mit.edu	GRCh37	12	25398284	25398284	+	missense_variant	Missense_Mutation	SNP	C	C	T	rs121913529		TCGA-2L-AAQJ-01	TCGA-2L-AAQJ-11			C	T	C	C		Valid	Somatic	Phase_I	WXS	KRAS_deep			Illumina GAIIx	181	55	58	0	ENST00000256078.4:c.35G>A	p.Gly12Asp	p.G12D	ENST00000256078	NM_033360.2	12	gGt/gAt	0	1	D	0.71417	Pancreas(8;6 143 191 305 2070 2426 4376 10944 11745 26467 38091 50869)
	KRAS		broad.mit.edu	GRCh37	12	25398285	25398285	+	missense_variant	Missense_Mutation	SNP	C	C	G	rs121913530		TCGA-3A-A9IH-01	TCGA-3A-A9IH-10			C	G	C	C		Valid	Somatic	Phase_I	WXS	KRAS_deep			Illumina GAIIx	237	46	64	0	ENST00000256078.4:c.34G>C	p.Gly12Arg	p.G12R	ENST00000256078	NM_033360.2	12	Ggt/Cgt	0	1	D	0.71417	Pancreas(8;6 143 191 305 2070 2426 4376 10944 11745 26467 38091 50869)
	KRAS		broad.mit.edu	GRCh37	12	25398284	25398284	+	missense_variant	Missense_Mutation	SNP	C	C	A	rs121913529		TCGA-2J-AAB4-01	TCGA-2J-AAB4-10			C	A	C	C		Valid	Somatic	Phase_I	WXS	targeted			Illumina GAIIx	165	18	67	0	ENST00000256078.4:c.35G>T	p.Gly12Val	p.G12V	ENST00000256078	NM_033360.2	12	gGt/gTt	0	1	D	0.71417	Pancreas(8;6 143 191 305 2070 2426 4376 10944 11745 26467 38091 50869)
	KRAS		broad.mit.edu	GRCh37	12	25398284	25398284	+	missense_variant	Missense_Mutation	SNP	C	C	A	rs121913529		TCGA-2J-AAB6-01	TCGA-2J-AAB6-10			C	A	C	C		Valid	Somatic	Phase_I	WXS	targeted			Illumina GAIIx	90	101	82	0	ENST00000256078.4:c.35G>T	p.Gly12Val	p.G12V	ENST00000256078	NM_033360.2	12	gGt/gTt	0	1	D	0.71417	Pancreas(8;6 143 191 305 2070 2426 4376 10944 11745 26467 38091 50869)
	KRAS		broad.mit.edu	GRCh37	12	25398284	25398284	+	missense_variant	Missense_Mutation	SNP	C	C	A	rs121913529		TCGA-HZ-A9TJ-01	TCGA-HZ-A9TJ-10			C	A	C	C		Valid	Somatic	Phase_I	WXS	targeted			Illumina GAIIx	189	64	69	0	ENST00000256078.4:c.35G>T	p.Gly12Val	p.G12V	ENST00000256078	NM_033360.2	12	gGt/gTt	0	1	D	0.71417	Pancreas(8;6 143 191 305 2070 2426 4376 10944 11745 26467 38091 50869)
	KRAS		broad.mit.edu	GRCh37	12	25398284	25398284	+	missense_variant	Missense_Mutation	SNP	C	C	T	rs121913529		TCGA-HV-A5A3-01	TCGA-HV-A5A3-10			C	T	C	C		Valid	Somatic	Phase_I	WXS	KRAS_deep			Illumina GAIIx	52	54	13	0	ENST00000256078.4:c.35G>A	p.Gly12Asp	p.G12D	ENST00000256078	NM_033360.2	12	gGt/gAt	0	1	D	0.71417	Pancreas(8;6 143 191 305 2070 2426 4376 10944 11745 26467 38091 50869)
	KRAS		broad.mit.edu	GRCh37	12	25398284	25398284	+	missense_variant	Missense_Mutation	SNP	C	C	A	rs121913529		TCGA-HZ-8001-01	TCGA-HZ-8001-10			C	A	C	C		Valid	Somatic	Phase_I	WXS	KRAS_deep			Illumina GAIIx	128	10	30	0	ENST00000256078.4:c.35G>T	p.Gly12Val	p.G12V	ENST00000256078	NM_033360.2	12	gGt/gTt	0	1	D	0.71417	Pancreas(8;6 143 191 305 2070 2426 4376 10944 11745 26467 38091 50869)
	KRAS		broad.mit.edu	GRCh37	12	25398284	25398284	+	missense_variant	Missense_Mutation	SNP	C	C	T	rs121913529		TCGA-FB-AAQ3-01	TCGA-FB-AAQ3-11			C	T	C	C		Valid	Somatic	Phase_I	WXS	targeted			Illumina GAIIx	186	30	83	0	ENST00000256078.4:c.35G>A	p.Gly12Asp	p.G12D	ENST00000256078	NM_033360.2	12	gGt/gAt	0	1	D	0.71417	Pancreas(8;6 143 191 305 2070 2426 4376 10944 11745 26467 38091 50869)
	KRAS		broad.mit.edu	GRCh37	12	25398284	25398284	+	missense_variant	Missense_Mutation	SNP	C	C	A	rs121913529		TCGA-HZ-8636-01	TCGA-HZ-8636-10			C	A	C	C		Valid	Somatic	Phase_I	WXS	KRAS_deep			Illumina GAIIx	75	29	9	0	ENST00000256078.4:c.35G>T	p.Gly12Val	p.G12V	ENST00000256078	NM_033360.2	12	gGt/gTt	0	1	D	0.71417	Pancreas(8;6 143 191 305 2070 2426 4376 10944 11745 26467 38091 50869)
	KRAS		broad.mit.edu	GRCh37	12	25398284	25398284	+	missense_variant	Missense_Mutation	SNP	C	C	T	rs121913529		TCGA-HZ-8315-01	TCGA-HZ-8315-10			C	T	C	C		Valid	Somatic	Phase_I	WXS	KRAS_deep			Illumina GAIIx	73	11	15	0	ENST00000256078.4:c.35G>A	p.Gly12Asp	p.G12D	ENST00000256078	NM_033360.2	12	gGt/gAt	0	1	D	0.71417	Pancreas(8;6 143 191 305 2070 2426 4376 10944 11745 26467 38091 50869)
	KRAS		broad.mit.edu	GRCh37	12	25398285	25398285	+	missense_variant	Missense_Mutation	SNP	C	C	G	rs121913530		TCGA-US-A77G-01	TCGA-US-A77G-11			C	G	C	C		Valid	Somatic	Phase_I	WXS	KRAS_deep			Illumina GAIIx	93	19	17	0	ENST00000256078.4:c.34G>C	p.Gly12Arg	p.G12R	ENST00000256078	NM_033360.2	12	Ggt/Cgt	0	1	D	0.71417	Pancreas(8;6 143 191 305 2070 2426 4376 10944 11745 26467 38091 50869)
	KRAS		broad.mit.edu	GRCh37	12	25398284	25398284	+	missense_variant	Missense_Mutation	SNP	C	C	T	rs121913529		TCGA-US-A779-01	TCGA-US-A779-11			C	T	C	C		Valid	Somatic	Phase_I	WXS	KRAS_deep			Illumina GAIIx	73	25	19	0	ENST00000256078.4:c.35G>A	p.Gly12Asp	p.G12D	ENST00000256078	NM_033360.2	12	gGt/gAt	0	1	D	0.71417	Pancreas(8;6 143 191 305 2070 2426 4376 10944 11745 26467 38091 50869)
	KRAS		broad.mit.edu	GRCh37	12	25398284	25398284	+	missense_variant	Missense_Mutation	SNP	C	C	A	rs121913529		TCGA-IB-7889-01	TCGA-IB-7889-10			C	A	C	C		Valid	Somatic	Phase_I	WXS	KRAS_deep			Illumina GAIIx	72	13	17	0	ENST00000256078.4:c.35G>T	p.Gly12Val	p.G12V	ENST00000256078	NM_033360.2	12	gGt/gTt	0	1	D	0.71417	Pancreas(8;6 143 191 305 2070 2426 4376 10944 11745 26467 38091 50869)
	KRAS		broad.mit.edu	GRCh37	12	25398284	25398284	+	missense_variant	Missense_Mutation	SNP	C	C	A	rs121913529		TCGA-IB-7645-01	TCGA-IB-7645-10			C	A	C	C		Valid	Somatic	Phase_I	WXS	KRAS_deep			Illumina GAIIx	116	14	18	0	ENST00000256078.4:c.35G>T	p.Gly12Val	p.G12V	ENST00000256078	NM_033360.2	12	gGt/gTt	0	1	D	0.71417	Pancreas(8;6 143 191 305 2070 2426 4376 10944 11745 26467 38091 50869)
	KRAS		broad.mit.edu	GRCh37	12	25398285	25398285	+	missense_variant	Missense_Mutation	SNP	C	C	G	rs121913530		TCGA-RB-A7B8-01	TCGA-RB-A7B8-10			C	G	C	C		Valid	Somatic	Phase_I	WXS	KRAS_deep			Illumina GAIIx	100	11	11	0	ENST00000256078.4:c.34G>C	p.Gly12Arg	p.G12R	ENST00000256078	NM_033360.2	12	Ggt/Cgt	0	1	D	0.71417	Pancreas(8;6 143 191 305 2070 2426 4376 10944 11745 26467 38091 50869)
	KRAS		broad.mit.edu	GRCh37	12	25398284	25398284	+	missense_variant	Missense_Mutation	SNP	C	C	A	rs121913529		TCGA-XD-AAUI-01	TCGA-XD-AAUI-10			C	A	C	C		Valid	Somatic	Phase_I	WXS	targeted			Illumina GAIIx	155	22	56	0	ENST00000256078.4:c.35G>T	p.Gly12Val	p.G12V	ENST00000256078	NM_033360.2	12	gGt/gTt	0	1	D	0.71417	Pancreas(8;6 143 191 305 2070 2426 4376 10944 11745 26467 38091 50869)
	KRAS		broad.mit.edu	GRCh37	12	25398284	25398284	+	missense_variant	Missense_Mutation	SNP	C	C	T	rs121913529		TCGA-HZ-8519-01	TCGA-HZ-8519-10			C	T	C	C		Valid	Somatic	Phase_I	WXS	KRAS_deep			Illumina GAIIx	92	5	18	0	ENST00000256078.4:c.35G>A	p.Gly12Asp	p.G12D	ENST00000256078	NM_033360.2	12	gGt/gAt	0	1	D	0.71417	Pancreas(8;6 143 191 305 2070 2426 4376 10944 11745 26467 38091 50869)
	KRAS		broad.mit.edu	GRCh37	12	25398284	25398284	+	missense_variant	Missense_Mutation	SNP	C	C	T	rs121913529		TCGA-XN-A8T3-01	TCGA-XN-A8T3-10			C	T	C	C		Valid	Somatic	Phase_I	WXS	KRAS_deep			Illumina GAIIx	305	79	73	0	ENST00000256078.4:c.35G>A	p.Gly12Asp	p.G12D	ENST00000256078	NM_033360.2	12	gGt/gAt	0	1	D	0.71417	Pancreas(8;6 143 191 305 2070 2426 4376 10944 11745 26467 38091 50869)
	KRAS		broad.mit.edu	GRCh37	12	25398285	25398285	+	missense_variant	Missense_Mutation	SNP	C	C	G	rs121913530		TCGA-F2-A8YN-01	TCGA-F2-A8YN-10			C	G	C	C		Valid	Somatic	Phase_I	WXS	KRAS_deep			Illumina GAIIx	132	72	53	0	ENST00000256078.4:c.34G>C	p.Gly12Arg	p.G12R	ENST00000256078	NM_033360.2	12	Ggt/Cgt	0	1	D	0.71417	Pancreas(8;6 143 191 305 2070 2426 4376 10944 11745 26467 38091 50869)
	KRAS		broad.mit.edu	GRCh37	12	25398285	25398285	+	missense_variant	Missense_Mutation	SNP	C	C	G	rs121913530		TCGA-HZ-8003-01	TCGA-HZ-8003-10			C	G	C	C		Valid	Somatic	Phase_I	WXS	KRAS_deep			Illumina GAIIx	186	8	18	0	ENST00000256078.4:c.34G>C	p.Gly12Arg	p.G12R	ENST00000256078	NM_033360.2	12	Ggt/Cgt	0	1	D	0.71417	Pancreas(8;6 143 191 305 2070 2426 4376 10944 11745 26467 38091 50869)
	KRAS		broad.mit.edu	GRCh37	12	25398285	25398285	+	missense_variant	Missense_Mutation	SNP	C	C	G	rs121913530		TCGA-2J-AABT-01	TCGA-2J-AABT-10								Untested	Somatic	Phase_I	WXS	none			Illumina GAIIx	173	24	128	0	ENST00000256078.4:c.34G>C	p.Gly12Arg	p.G12R	ENST00000256078	NM_033360.2	12	Ggt/Cgt	0		D	0.71417	Pancreas(8;6 143 191 305 2070 2426 4376 10944 11745 26467 38091 50869)
	KRAS		broad.mit.edu	GRCh37	12	25398284	25398284	+	missense_variant	Missense_Mutation	SNP	C	C	T	rs121913529		TCGA-HV-A5A5-01	TCGA-HV-A5A5-10			C	T	C	C		Valid	Somatic	Phase_I	WXS	targeted			Illumina GAIIx	91	7	12	0	ENST00000256078.4:c.35G>A	p.Gly12Asp	p.G12D	ENST00000256078	NM_033360.2	12	gGt/gAt	0	1	D	0.71417	Pancreas(8;6 143 191 305 2070 2426 4376 10944 11745 26467 38091 50869)
	KRAS		broad.mit.edu	GRCh37	12	25398284	25398284	+	missense_variant	Missense_Mutation	SNP	C	C	T	rs121913529		TCGA-FB-AAPS-01	TCGA-FB-AAPS-11			C	T	C	C		Valid	Somatic	Phase_I	WXS	KRAS_deep			Illumina GAIIx	259	13	49	0	ENST00000256078.4:c.35G>A	p.Gly12Asp	p.G12D	ENST00000256078	NM_033360.2	12	gGt/gAt	0	1	D	0.71417	Pancreas(8;6 143 191 305 2070 2426 4376 10944 11745 26467 38091 50869)
Part2	Tumor_Sample	HSF1				Part3
HSF1_EXPRESSION	TCGA-3A-A9IO-01A	4.0477				Tumor_Sample_KRASMUT	HSF1	Merge	Tumor_Sample_KRASWT	HSF1
	TCGA-US-A774-01A	4.12286				TCGA-2J-AAB1-01A	4.31033		TCGA-2J-AABA-01A	4.03171
	TCGA-HZ-A49H-01A	3.79774				TCGA-2J-AAB4-01A	4.40752		TCGA-2J-AABP-01A	4.57944
	TCGA-FB-A4P5-01A	4.09652				TCGA-2J-AAB6-01A	4.38663		TCGA-2L-AAQM-01A	3.98747
	TCGA-FB-AAPS-01A	4.12002				TCGA-2J-AAB8-01A	3.71138		TCGA-3A-A9I5-01A	4.38986
	TCGA-3A-A9IN-01A	4.1976				TCGA-2J-AAB9-01A	4.58689		TCGA-3A-A9IJ-01A	4.53573
	TCGA-HV-A5A5-01A	3.98103				TCGA-2J-AABE-01A	4.26932		TCGA-3A-A9IL-01A	4.22229
	TCGA-H6-8124-01A	3.96385				TCGA-2J-AABF-01A	4.05797		TCGA-3A-A9IN-01A	4.1976
	TCGA-US-A77G-01A	4.52709				TCGA-2J-AABH-01A	5.5774		TCGA-3A-A9IO-01A	4.0477
	TCGA-3A-A9IJ-01A	4.53573				TCGA-2J-AABI-01A	4.99386		TCGA-3A-A9IR-01A	3.9515
	TCGA-HZ-A8P0-01A	4.1168				TCGA-2J-AABK-01A	3.94415		TCGA-3A-A9IS-01A	4.80757
	TCGA-IB-7644-01A	4.01516				TCGA-2J-AABO-01A	4.12888		TCGA-3A-A9IV-01A	3.52861
	TCGA-IB-A7LX-01A	5.37807				TCGA-2J-AABR-01A	3.91009		TCGA-3A-A9J0-01A	4.05116
	TCGA-2J-AABK-01A	3.94415				TCGA-2J-AABT-01A	4.4599		TCGA-3E-AAAY-01A	4.07057
	TCGA-HZ-A9TJ-06A	4.44267				TCGA-2J-AABU-01A	4.31138		TCGA-F2-6880-01A	4.40308
	TCGA-S4-A8RP-01A	4.23825				TCGA-2J-AABV-01A	4.4859		TCGA-F2-7273-01A	4.07543
	TCGA-2L-AAQM-01A	3.98747				TCGA-2L-AAQA-01A	4.29235		TCGA-F2-7276-01A	3.71628
	TCGA-XD-AAUG-01A	4.04988				TCGA-2L-AAQE-01A	5.19055		TCGA-F2-A44H-01A	4.20381
	TCGA-M8-A5N4-01A	4.59011				TCGA-2L-AAQI-01A	3.80167		TCGA-FB-A7DR-01A	4.12976
	TCGA-2L-AAQI-01A	3.80167				TCGA-2L-AAQJ-01A	4.23924		TCGA-FB-AAPP-01A	4.08928
	TCGA-HZ-7919-01A	3.44416				TCGA-2L-AAQL-01A	4.10577		TCGA-H8-A6C1-01A	4.14565
	TCGA-HZ-8005-01A	4.74793				TCGA-3A-A9I7-01A	4.05376		TCGA-HV-A7OP-01A	4.54545
	TCGA-IB-AAUM-01A	4.29336				TCGA-3A-A9I9-01A	4.36055		TCGA-HZ-7289-01A	4.87674
	TCGA-IB-7888-01A	3.37638				TCGA-3A-A9IB-01A	4.58749		TCGA-HZ-7918-01A	3.34947
	TCGA-2J-AAB9-01A	4.58689				TCGA-3A-A9IC-01A	4.41147		TCGA-HZ-7920-01A	3.22308
	TCGA-2L-AAQJ-01A	4.23924				TCGA-3A-A9IH-01A	4.65063		TCGA-HZ-7923-01A	3.60702
	TCGA-IB-AAUU-01A	4.08886				TCGA-3A-A9IU-01A	4.45203		TCGA-HZ-7924-01A	3.57711
	TCGA-Q3-A5QY-01A	4.31033				TCGA-3A-A9IX-01A	3.89027		TCGA-HZ-8317-01A	3.57812
	TCGA-FB-AAQ1-01A	4.74716				TCGA-3A-A9IZ-01A	4.6665		TCGA-HZ-8638-01A	3.31405
	TCGA-HV-A5A3-01A	4.68792				TCGA-3E-AAAZ-01A	4.29857		TCGA-IB-7654-01A	4.11774
	TCGA-IB-AAUO-01A	4.53573				TCGA-F2-6879-01A	4.58132		TCGA-IB-7888-01A	3.37638
	TCGA-IB-8127-01A	4.22087				TCGA-F2-A44G-01A	4.11774		TCGA-IB-7891-01A	3.15039
	TCGA-FB-A545-01A	4.81933				TCGA-F2-A7TX-01A	4.7891		TCGA-IB-A5SQ-01A	4.44107
	TCGA-YH-A8SY-01A	4.46515				TCGA-F2-A8YN-01A	4.75024		TCGA-IB-A5SS-01A	4.91405
	TCGA-IB-A5SQ-01A	4.44107				TCGA-FB-A4P5-01A	4.09652		TCGA-IB-AAUT-01A	4.02134
	TCGA-HV-A7OP-01A	4.54545				TCGA-FB-A4P6-01A	4.14659		TCGA-IB-AAUV-01A	3.97317
	TCGA-FB-AAQ6-01A	4.59775				TCGA-FB-A545-01A	4.81933		TCGA-IB-AAUW-01A	3.72246
	TCGA-FB-AAQ2-01A	5.23586				TCGA-FB-A5VM-01A	4.90496		TCGA-L1-A7W4-01A	5.7919
	TCGA-US-A77J-01A	4.19515				TCGA-FB-A78T-01A	4.58944		TCGA-LB-A7SX-01A	4.46224
	TCGA-F2-7273-01A	4.07543				TCGA-FB-AAPQ-01A	4.4599		TCGA-LB-A8F3-01A	4.001
	TCGA-3A-A9I9-01A	4.36055				TCGA-FB-AAPS-01A	4.12002		TCGA-RL-AAAS-01A	3.88819
	TCGA-IB-7654-01A	4.11774				TCGA-FB-AAPU-01A	4.32542		TCGA-US-A776-01A	4.36928
	TCGA-IB-7893-01A	3.90524				TCGA-FB-AAPY-01A	4.24486		TCGA-US-A77E-01A	4.37246
	TCGA-S4-A8RM-01A	4.33297				TCGA-FB-AAPZ-01A	3.91696		TCGA-US-A77J-01A	4.19515
	TCGA-IB-AAUW-01A	3.72246				TCGA-FB-AAQ0-01A	4.67381		TCGA-XD-AAUH-01A	4.07456
	TCGA-FB-AAPZ-01A	3.91696				TCGA-FB-AAQ1-01A	4.74716
	TCGA-IB-AAUS-01A	3.97183				TCGA-FB-AAQ2-01A	5.23586
	TCGA-F2-6879-01A	4.58132				TCGA-FB-AAQ3-01A	3.7709
	TCGA-3A-A9IS-01A	4.80757				TCGA-FB-AAQ6-01A	4.59775
	TCGA-L1-A7W4-01A	5.7919				TCGA-H6-8124-01A	3.96385
	TCGA-FB-A7DR-01A	4.12976				TCGA-H6-A45N-01A	4.10217
	TCGA-2J-AABO-01A	4.12888				TCGA-HV-A5A3-01A	4.68792
	TCGA-3A-A9IH-01A	4.65063				TCGA-HV-A5A4-01A	4.11449
	TCGA-PZ-A5RE-01A	4.42869				TCGA-HV-A5A5-01A	3.98103
	TCGA-HZ-8003-01A	3.81276				TCGA-HV-A5A6-01A	5.2171
	TCGA-3A-A9IB-01A	4.58749				TCGA-HV-A7OL-01A	4.38986
	TCGA-H6-A45N-01A	4.10217				TCGA-HV-AA8V-01A	4.41581
	TCGA-HZ-8001-01A	3.83272				TCGA-HV-AA8X-01A	4.3568
	TCGA-IB-A7M4-01A	5.6778				TCGA-HZ-7919-01A	3.44416
	TCGA-2J-AABP-01A	4.57944				TCGA-HZ-7922-01A	4.15713
	TCGA-HZ-A77Q-01A	3.93609				TCGA-HZ-7925-01A	4.16919
	TCGA-HZ-7926-01A	3.74581				TCGA-HZ-7926-01A	3.74581
	TCGA-XN-A8T5-01A	4.18884				TCGA-HZ-8001-01A	3.83272
	TCGA-IB-A5ST-01A	4.21066				TCGA-HZ-8002-01A	3.3357
	TCGA-Z5-AAPL-01A	4.12194				TCGA-HZ-8003-01A	3.81276
	TCGA-IB-7652-01A	4.27136				TCGA-HZ-8005-01A	4.74793
	TCGA-IB-7886-01A	3.94496				TCGA-HZ-8315-01A	4.01696
	TCGA-FB-AAQ0-01A	4.67381				TCGA-HZ-8519-01A	3.84548
	TCGA-IB-7897-01A	3.1376				TCGA-HZ-8636-01A	4.09602
	TCGA-2J-AABH-01A	5.5774				TCGA-HZ-8637-01A	3.74198
	TCGA-IB-AAUT-01A	4.02134				TCGA-HZ-A49G-01A	4.04725
	TCGA-HV-A5A4-01A	4.11449				TCGA-HZ-A49H-01A	3.79774
	TCGA-US-A779-01A	4.92058				TCGA-HZ-A49I-01A	4.43375
	TCGA-FB-AAPP-01A	4.08928				TCGA-HZ-A4BH-01A	4.46455
	TCGA-HV-A5A6-01A	5.2171				TCGA-HZ-A4BK-01A	4.14565
	TCGA-IB-7887-01A	4.09982				TCGA-HZ-A77O-01A	4.54862
	TCGA-FB-A78T-01A	4.58944				TCGA-HZ-A77P-01A	4.10577
	TCGA-IB-7646-01A	3.89481				TCGA-HZ-A77Q-01A	3.93609
	TCGA-RL-AAAS-01A	3.88819				TCGA-HZ-A8P0-01A	4.1168
	TCGA-US-A77E-01A	4.37246				TCGA-HZ-A8P1-01A	4.20283
	TCGA-HZ-8636-01A	4.09603				TCGA-HZ-A9TJ-01A	4.40038
	TCGA-IB-AAUP-01A	3.96339				TCGA-IB-7644-01A	4.01516
	TCGA-IB-7885-01A	4.17055				TCGA-IB-7645-01A	3.47156
	TCGA-IB-AAUR-01A	4.22229				TCGA-IB-7646-01A	3.89481
	TCGA-IB-7889-01A	3.7296				TCGA-IB-7649-01A	3.49689
	TCGA-F2-A8YN-01A	4.75024				TCGA-IB-7651-01A	3.69567
	TCGA-3E-AAAZ-01A	4.29857				TCGA-IB-7652-01A	4.27136
	TCGA-HZ-8637-01A	3.74198				TCGA-IB-7885-01A	4.17055
	TCGA-HZ-A4BH-01A	4.46455				TCGA-IB-7886-01A	3.94496
	TCGA-3A-A9I5-01A	4.38986				TCGA-IB-7887-01A	4.09982
	TCGA-XD-AAUL-01A	4.25736				TCGA-IB-7889-01A	3.7296
	TCGA-HZ-7923-01A	3.60702				TCGA-IB-7890-01A	4.24333
	TCGA-2J-AABE-01A	4.26932				TCGA-IB-7893-01A	3.90524
	TCGA-FB-AAPU-01A	4.32542				TCGA-IB-7897-01A	3.1376
	TCGA-3A-A9IC-01A	4.41147				TCGA-IB-8126-01A	3.65903
	TCGA-2J-AABI-01A	4.99386				TCGA-IB-8127-01A	4.22087
	TCGA-HZ-A77O-01A	4.54862				TCGA-IB-A5SO-01A	4.39206
	TCGA-YY-A8LH-01A	4.48941				TCGA-IB-A5SP-01A	4.58817
	TCGA-3E-AAAY-01A	4.07057				TCGA-IB-A5ST-01A	4.21066
	TCGA-3A-A9IZ-01A	4.6665				TCGA-IB-A6UF-01A	4.87992
	TCGA-IB-A6UG-01A	5.02119				TCGA-IB-A6UG-01A	5.02119
	TCGA-FB-A5VM-01A	4.90496				TCGA-IB-A7LX-01A	5.37807
	TCGA-RB-AA9M-01A	3.72921				TCGA-IB-A7M4-01A	5.6778
	TCGA-HZ-A49G-01A	4.04725				TCGA-IB-AAUM-01A	4.29336
	TCGA-HV-AA8X-01A	4.3568				TCGA-IB-AAUN-01A	4.66322
	TCGA-LB-A7SX-01A	4.46224				TCGA-IB-AAUO-01A	4.53573
	TCGA-HZ-7922-01A	4.15713				TCGA-IB-AAUP-01A	3.96339
	TCGA-2J-AABV-01A	4.4859				TCGA-IB-AAUQ-01A	4.24283
	TCGA-IB-AAUN-01A	4.66322				TCGA-IB-AAUR-01A	4.22229
	TCGA-2L-AAQA-01A	4.29235				TCGA-IB-AAUS-01A	3.97183
	TCGA-IB-A6UF-01A	4.87992				TCGA-IB-AAUU-01A	4.08886
	TCGA-HV-A7OL-01A	4.38986				TCGA-LB-A9Q5-01A	4.27637
	TCGA-IB-7651-01A	3.69567				TCGA-M8-A5N4-01A	4.59011
	TCGA-2J-AABU-01A	4.31138				TCGA-OE-A75W-01A	5.23273
	TCGA-XN-A8T3-01A	4.42631				TCGA-Q3-A5QY-01A	4.31033
	TCGA-HV-AA8V-01A	4.41581				TCGA-Q3-AA2A-01A	4.36218
	TCGA-S4-A8RO-01A	4.90243				TCGA-RB-A7B8-01A	4.22378
	TCGA-IB-8126-01A	3.65903				TCGA-RB-AA9M-01A	3.72921
	TCGA-2J-AABF-01A	4.05797				TCGA-S4-A8RM-01A	4.33297
	TCGA-US-A776-01A	4.36928				TCGA-S4-A8RO-01A	4.90243
	TCGA-2J-AABT-01A	4.4599				TCGA-S4-A8RP-01A	4.23825
	TCGA-IB-7891-01A	3.15039				TCGA-US-A774-01A	4.12286
	TCGA-XD-AAUI-01A	4.30879				TCGA-US-A779-01A	4.92058
	TCGA-RB-A7B8-01A	4.22378				TCGA-US-A77G-01A	4.52709
	TCGA-XD-AAUH-01A	4.07456				TCGA-XD-AAUG-01A	4.04988
	TCGA-2J-AAB6-01A	4.38663				TCGA-XD-AAUI-01A	4.30879
	TCGA-2J-AAB4-01A	4.40752				TCGA-XD-AAUL-01A	4.25736
	TCGA-FB-A4P6-01A	4.14659				TCGA-XN-A8T3-01A	4.42631
	TCGA-IB-AAUV-01A	3.97317				TCGA-XN-A8T5-01A	4.18884
	TCGA-3A-A9IL-01A	4.22229				TCGA-YB-A89D-01A	4.31195
	TCGA-IB-AAUQ-01A	4.24283				TCGA-YH-A8SY-01A	4.46515
	TCGA-FB-AAPQ-01A	4.4599				TCGA-YY-A8LH-01A	4.48941
	TCGA-IB-A5SS-01A	4.91405				TCGA-Z5-AAPL-01A	4.12194
	TCGA-IB-7645-01A	3.47156
	TCGA-2J-AAB1-01A	4.31033
	TCGA-IB-A5SP-01A	4.58817
	TCGA-OE-A75W-01A	5.23273
	TCGA-F2-7276-01A	3.71628
	TCGA-3A-A9IX-01A	3.89027
	TCGA-3A-A9IV-01A	3.52861
	TCGA-HZ-8315-01A	4.01696
	TCGA-Q3-AA2A-01A	4.36218
	TCGA-HZ-7925-01A	4.16919
	TCGA-HZ-7289-01A	4.87674
	TCGA-HZ-8519-01A	3.84548
	TCGA-F2-A44G-01A	4.11774
	TCGA-HZ-8638-01A	3.31405
	TCGA-3A-A9IU-01A	4.45203
	TCGA-2J-AABR-01A	3.91009
	TCGA-2J-AABA-01A	4.03171
	TCGA-F2-6880-01A	4.40308
	TCGA-F2-A7TX-01A	4.7891
	TCGA-HZ-A4BK-01A	4.14565
	TCGA-HZ-A77P-01A	4.10577
	TCGA-3A-A9J0-01A	4.05116
	TCGA-HZ-A8P1-01A	4.20283
	TCGA-2L-AAQL-01A	4.10577
	TCGA-HZ-8317-01A	3.57812
	TCGA-HZ-7920-01A	3.22308
	TCGA-HZ-A49I-01A	4.43375
	TCGA-HZ-A9TJ-01A	4.40038
	TCGA-YB-A89D-01A	4.31195
	TCGA-IB-7649-01A	3.49689
	TCGA-LB-A8F3-01A	4.001
	TCGA-2J-AAB8-01A	3.71138
	TCGA-3A-A9IR-01A	3.9515
	TCGA-2L-AAQE-01A	5.19055
	TCGA-3A-A9I7-01A	4.05376
	TCGA-IB-7890-01A	4.24333
	TCGA-LB-A9Q5-01A	4.27637
	TCGA-HZ-7924-01A	3.57711
	TCGA-HZ-8002-01A	3.3357
	TCGA-FB-AAPY-01A	4.24486
	TCGA-F2-A44H-01A	4.20381
	TCGA-IB-A5SO-01A	4.39206
	TCGA-FB-AAQ3-01A	3.7709
	TCGA-HZ-7918-01A	3.34947
	TCGA-H8-A6C1-01A	4.14565
[truncated: 202 more columns]
