# Supplementary material for: The EGFR-HSF1 axis accelerates the tumorigenesis of pancreatic cancer
Source: J Exp Clin Cancer Res. 2021 Jan 9;40:25. doi: 10.1186/s13046-020-01823-4 (PMC7797143; doi:10.1186/s13046-020-01823-4)
Supplement: Supplementary file 3 — Additional file 3: Table S2. Source files of bioinformatics analysis on EGFR (mainly TCGA PAAD datasets). [file 13046_2020_1823_MOESM3_ESM.xlsx]

## Sheet: TCGA-EGFR-GSEA-C2 KEGG-UP
NAME	GS<br> follow link to MSigDB	GS DETAILS	SIZE	ES	NES	NOM p-val	FDR q-val	FWER p-val	RANK AT MAX	LEADING EDGE
KEGG_ADHERENS_JUNCTION	KEGG_ADHERENS_JUNCTION	Details ...	73	0.68648	2.34828	0	0	0	8195	tags=56%, list=15%, signal=66%
KEGG_ENDOMETRIAL_CANCER	KEGG_ENDOMETRIAL_CANCER	Details ...	52	0.639818	2.21842	0	0.00062963	0.001	5070	tags=44%, list=9%, signal=49%
KEGG_PANCREATIC_CANCER	KEGG_PANCREATIC_CANCER	Details ...	69	0.655394	2.20591	0	0.000419753	0.001	9334	tags=57%, list=17%, signal=68%
KEGG_UBIQUITIN_MEDIATED_PROTEOLYSIS	KEGG_UBIQUITIN_MEDIATED_PROTEOLYSIS	Details ...	134	0.44902	2.17749	0	0.0023132	0.005	10499	tags=45%, list=19%, signal=55%
KEGG_PROSTATE_CANCER	KEGG_PROSTATE_CANCER	Details ...	89	0.643116	2.14577	0	0.00357298	0.011	5070	tags=43%, list=9%, signal=47%
KEGG_ERBB_SIGNALING_PATHWAY	KEGG_ERBB_SIGNALING_PATHWAY	Details ...	87	0.545086	2.14038	0	0.00316028	0.012	5070	tags=33%, list=9%, signal=37%
KEGG_NON_SMALL_CELL_LUNG_CANCER	KEGG_NON_SMALL_CELL_LUNG_CANCER	Details ...	54	0.627472	2.12282	0	0.003074	0.014	5070	tags=43%, list=9%, signal=47%
KEGG_SMALL_CELL_LUNG_CANCER	KEGG_SMALL_CELL_LUNG_CANCER	Details ...	84	0.654589	2.11441	0	0.00268975	0.014	5111	tags=45%, list=9%, signal=50%
KEGG_GLIOMA	KEGG_GLIOMA	Details ...	65	0.589122	2.10146	0	0.00269836	0.016	5070	tags=37%, list=9%, signal=41%
KEGG_COLORECTAL_CANCER	KEGG_COLORECTAL_CANCER	Details ...	61	0.575485	2.05196	0	0.00452312	0.023	5070	tags=38%, list=9%, signal=41%
KEGG_CHRONIC_MYELOID_LEUKEMIA	KEGG_CHRONIC_MYELOID_LEUKEMIA	Details ...	72	0.565343	2.02977	0	0.00518567	0.029	5070	tags=35%, list=9%, signal=38%
KEGG_PATHWAYS_IN_CANCER	KEGG_PATHWAYS_IN_CANCER	Details ...	324	0.544085	2.02703	0	0.00492932	0.03	8298	tags=44%, list=15%, signal=51%
KEGG_PENTOSE_PHOSPHATE_PATHWAY	KEGG_PENTOSE_PHOSPHATE_PATHWAY	Details ...	26	0.586049	2.01866	0.00194932	0.00488871	0.033	12758	tags=50%, list=23%, signal=65%
KEGG_DORSO_VENTRAL_AXIS_FORMATION	KEGG_DORSO_VENTRAL_AXIS_FORMATION	Details ...	24	0.649679	1.998	0	0.00532349	0.037	4402	tags=38%, list=8%, signal=41%
KEGG_RENAL_CELL_CARCINOMA	KEGG_RENAL_CELL_CARCINOMA	Details ...	69	0.57274	1.99437	0.0019685	0.00532901	0.038	6215	tags=41%, list=11%, signal=46%
KEGG_ENDOCYTOSIS	KEGG_ENDOCYTOSIS	Details ...	181	0.45453	1.9929	0	0.00512626	0.039	8820	tags=37%, list=16%, signal=44%
KEGG_REGULATION_OF_ACTIN_CYTOSKELETON	KEGG_REGULATION_OF_ACTIN_CYTOSKELETON	Details ...	213	0.535372	1.97812	0	0.00581402	0.048	11222	tags=51%, list=20%, signal=64%
KEGG_MELANOMA	KEGG_MELANOMA	Details ...	71	0.576522	1.97309	0.0019305	0.00574718	0.05	6347	tags=39%, list=12%, signal=45%
KEGG_TGF_BETA_SIGNALING_PATHWAY	KEGG_TGF_BETA_SIGNALING_PATHWAY	Details ...	84	0.633116	1.96674	0.00200401	0.00617788	0.054	9378	tags=52%, list=17%, signal=63%
KEGG_FOCAL_ADHESION	KEGG_FOCAL_ADHESION	Details ...	199	0.608068	1.95655	0.00378072	0.00640192	0.058	8196	tags=52%, list=15%, signal=61%
KEGG_BLADDER_CANCER	KEGG_BLADDER_CANCER		42	0.597979	1.95548	0.00204918	0.00619986	0.059	5274	tags=38%, list=10%, signal=42%
KEGG_AXON_GUIDANCE	KEGG_AXON_GUIDANCE		129	0.534118	1.93614	0	0.00844578	0.079	5815	tags=36%, list=11%, signal=40%
KEGG_TIGHT_JUNCTION	KEGG_TIGHT_JUNCTION		132	0.480908	1.90185	0.0019802	0.0129264	0.121	10401	tags=50%, list=19%, signal=61%
KEGG_NEUROTROPHIN_SIGNALING_PATHWAY	KEGG_NEUROTROPHIN_SIGNALING_PATHWAY		126	0.471178	1.88838	0.00382409	0.0141504	0.138	8195	tags=40%, list=15%, signal=46%
KEGG_THYROID_CANCER	KEGG_THYROID_CANCER		29	0.55489	1.86431	0.00608519	0.0177989	0.169	9721	tags=52%, list=18%, signal=63%
KEGG_GALACTOSE_METABOLISM	KEGG_GALACTOSE_METABOLISM		26	0.563245	1.8607	0.00208768	0.0174027	0.172	6711	tags=46%, list=12%, signal=53%
KEGG_OOCYTE_MEIOSIS	KEGG_OOCYTE_MEIOSIS		112	0.437327	1.8265	0.0020284	0.0240637	0.226	12816	tags=46%, list=23%, signal=59%
KEGG_ALDOSTERONE_REGULATED_SODIUM_REABSORPTION	KEGG_ALDOSTERONE_REGULATED_SODIUM_REABSORPTION		42	0.562889	1.82381	0.00193424	0.023992	0.229	7945	tags=45%, list=14%, signal=53%
KEGG_MTOR_SIGNALING_PATHWAY	KEGG_MTOR_SIGNALING_PATHWAY		52	0.505205	1.81994	0.00570342	0.0242627	0.239	5183	tags=35%, list=9%, signal=38%
KEGG_STARCH_AND_SUCROSE_METABOLISM	KEGG_STARCH_AND_SUCROSE_METABOLISM		52	0.606553	1.81887	0.010101	0.0236742	0.241	7057	tags=42%, list=13%, signal=48%
KEGG_PATHOGENIC_ESCHERICHIA_COLI_INFECTION	KEGG_PATHOGENIC_ESCHERICHIA_COLI_INFECTION		56	0.527697	1.81874	0.00795229	0.0229106	0.241	13925	tags=55%, list=25%, signal=74%
KEGG_ARRHYTHMOGENIC_RIGHT_VENTRICULAR_CARDIOMYOPATHY_ARVC	KEGG_ARRHYTHMOGENIC_RIGHT_VENTRICULAR_CARDIOMYOPATHY_ARVC		74	0.566893	1.81202	0.00571429	0.0238017	0.253	6108	tags=41%, list=11%, signal=46%
KEGG_WNT_SIGNALING_PATHWAY	KEGG_WNT_SIGNALING_PATHWAY		150	0.44099	1.79271	0.00389864	0.0273089	0.282	11683	tags=43%, list=21%, signal=54%
KEGG_CELL_CYCLE	KEGG_CELL_CYCLE		123	0.547482	1.76988	0.0185567	0.032731	0.321	10049	tags=47%, list=18%, signal=58%
KEGG_INSULIN_SIGNALING_PATHWAY	KEGG_INSULIN_SIGNALING_PATHWAY		137	0.40216	1.76836	0.00756144	0.0322157	0.322	7889	tags=33%, list=14%, signal=38%
KEGG_ECM_RECEPTOR_INTERACTION	KEGG_ECM_RECEPTOR_INTERACTION		84	0.660877	1.76812	0.00959693	0.0313859	0.322	7894	tags=58%, list=14%, signal=68%
KEGG_BASAL_TRANSCRIPTION_FACTORS	KEGG_BASAL_TRANSCRIPTION_FACTORS		35	0.4881	1.75986	0.0165289	0.0328096	0.339	6062	tags=29%, list=11%, signal=32%
KEGG_GAP_JUNCTION	KEGG_GAP_JUNCTION		90	0.484344	1.72921	0.00929368	0.0418413	0.401	10214	tags=43%, list=19%, signal=53%
KEGG_PROGESTERONE_MEDIATED_OOCYTE_MATURATION	KEGG_PROGESTERONE_MEDIATED_OOCYTE_MATURATION		85	0.431497	1.69159	0.00585938	0.0564889	0.492	7350	tags=34%, list=13%, signal=39%
KEGG_ACUTE_MYELOID_LEUKEMIA	KEGG_ACUTE_MYELOID_LEUKEMIA		57	0.512171	1.67546	0.0249042	0.0619959	0.521	10785	tags=47%, list=20%, signal=59%
KEGG_HYPERTROPHIC_CARDIOMYOPATHY_HCM	KEGG_HYPERTROPHIC_CARDIOMYOPATHY_HCM		82	0.487701	1.61659	0.0287356	0.0949636	0.655	8141	tags=37%, list=15%, signal=43%
KEGG_NOD_LIKE_RECEPTOR_SIGNALING_PATHWAY	KEGG_NOD_LIKE_RECEPTOR_SIGNALING_PATHWAY		62	0.515987	1.58214	0.0656064	0.117115	0.707	7319	tags=44%, list=13%, signal=50%
KEGG_APOPTOSIS	KEGG_APOPTOSIS		87	0.457031	1.58109	0.046	0.114936	0.708	8796	tags=40%, list=16%, signal=48%
KEGG_N_GLYCAN_BIOSYNTHESIS	KEGG_N_GLYCAN_BIOSYNTHESIS		46	0.416093	1.57816	0.057377	0.114482	0.713	13462	tags=46%, list=24%, signal=60%
KEGG_EPITHELIAL_CELL_SIGNALING_IN_HELICOBACTER_PYLORI_INFECTION	KEGG_EPITHELIAL_CELL_SIGNALING_IN_HELICOBACTER_PYLORI_INFECTION		68	0.390111	1.57133	0.0425963	0.11715	0.727	10883	tags=38%, list=20%, signal=48%
KEGG_TOLL_LIKE_RECEPTOR_SIGNALING_PATHWAY	KEGG_TOLL_LIKE_RECEPTOR_SIGNALING_PATHWAY		102	0.460839	1.56074	0.0601942	0.123589	0.748	7204	tags=35%, list=13%, signal=41%
KEGG_HEDGEHOG_SIGNALING_PATHWAY	KEGG_HEDGEHOG_SIGNALING_PATHWAY		56	0.470814	1.55766	0.0452756	0.123717	0.753	5646	tags=34%, list=10%, signal=38%
KEGG_LONG_TERM_POTENTIATION	KEGG_LONG_TERM_POTENTIATION		70	0.40321	1.5316	0.0261682	0.143329	0.804	7651	tags=30%, list=14%, signal=35%
KEGG_BASAL_CELL_CARCINOMA	KEGG_BASAL_CELL_CARCINOMA		55	0.488141	1.52375	0.0460922	0.146713	0.818	5336	tags=35%, list=10%, signal=38%
KEGG_DILATED_CARDIOMYOPATHY	KEGG_DILATED_CARDIOMYOPATHY		89	0.462577	1.51968	0.0454545	0.14746	0.826	10267	tags=40%, list=19%, signal=50%
KEGG_LEUKOCYTE_TRANSENDOTHELIAL_MIGRATION	KEGG_LEUKOCYTE_TRANSENDOTHELIAL_MIGRATION		116	0.476087	1.51124	0.0884086	0.152226	0.838	8196	tags=42%, list=15%, signal=50%
KEGG_O_GLYCAN_BIOSYNTHESIS	KEGG_O_GLYCAN_BIOSYNTHESIS		30	0.511398	1.5089	0.0734127	0.151013	0.839	9396	tags=43%, list=17%, signal=52%
KEGG_FC_GAMMA_R_MEDIATED_PHAGOCYTOSIS	KEGG_FC_GAMMA_R_MEDIATED_PHAGOCYTOSIS		96	0.441652	1.50662	0.0775348	0.149909	0.842	12157	tags=49%, list=22%, signal=63%
KEGG_INOSITOL_PHOSPHATE_METABOLISM	KEGG_INOSITOL_PHOSPHATE_METABOLISM		54	0.424158	1.49836	0.0531136	0.153435	0.853	11222	tags=41%, list=20%, signal=51%
KEGG_JAK_STAT_SIGNALING_PATHWAY	KEGG_JAK_STAT_SIGNALING_PATHWAY		155	0.429284	1.46875	0.0710059	0.178919	0.89	8745	tags=34%, list=16%, signal=40%
KEGG_LYSINE_DEGRADATION	KEGG_LYSINE_DEGRADATION		44	0.373131	1.46502	0.0599174	0.179157	0.894	11383	tags=45%, list=21%, signal=57%
KEGG_PHOSPHATIDYLINOSITOL_SIGNALING_SYSTEM	KEGG_PHOSPHATIDYLINOSITOL_SIGNALING_SYSTEM		76	0.408421	1.46264	0.0583804	0.178267	0.897	7651	tags=30%, list=14%, signal=35%
KEGG_GLYCOLYSIS_GLUCONEOGENESIS	KEGG_GLYCOLYSIS_GLUCONEOGENESIS		62	0.40359	1.4551	0.0748988	0.182199	0.905	8791	tags=32%, list=16%, signal=38%
KEGG_MELANOGENESIS	KEGG_MELANOGENESIS		101	0.380103	1.4384	0.0604288	0.196702	0.915	10019	tags=37%, list=18%, signal=45%
KEGG_MAPK_SIGNALING_PATHWAY	KEGG_MAPK_SIGNALING_PATHWAY		266	0.339107	1.4313	0.0581395	0.200667	0.917	8147	tags=29%, list=15%, signal=33%
KEGG_BIOSYNTHESIS_OF_UNSATURATED_FATTY_ACIDS	KEGG_BIOSYNTHESIS_OF_UNSATURATED_FATTY_ACIDS		22	0.471214	1.42622	0.0905433	0.202838	0.924	7130	tags=32%, list=13%, signal=37%
KEGG_P53_SIGNALING_PATHWAY	KEGG_P53_SIGNALING_PATHWAY		68	0.409512	1.40675	0.104082	0.219379	0.94	7350	tags=35%, list=13%, signal=41%
KEGG_SPHINGOLIPID_METABOLISM	KEGG_SPHINGOLIPID_METABOLISM		39	0.405316	1.40596	0.103792	0.216577	0.94	6782	tags=33%, list=12%, signal=38%
KEGG_VIRAL_MYOCARDITIS	KEGG_VIRAL_MYOCARDITIS		68	0.487801	1.39332	0.184524	0.22701	0.949	14773	tags=60%, list=27%, signal=82%
KEGG_NATURAL_KILLER_CELL_MEDIATED_CYTOTOXICITY	KEGG_NATURAL_KILLER_CELL_MEDIATED_CYTOTOXICITY		132	0.427368	1.37951	0.126761	0.238159	0.953	13446	tags=48%, list=24%, signal=63%
KEGG_NOTCH_SIGNALING_PATHWAY	KEGG_NOTCH_SIGNALING_PATHWAY		47	0.381292	1.36687	0.127168	0.248508	0.96	7760	tags=36%, list=14%, signal=42%
KEGG_MISMATCH_REPAIR	KEGG_MISMATCH_REPAIR		23	0.510619	1.35665	0.186296	0.257192	0.968	9046	tags=39%, list=16%, signal=47%
KEGG_NICOTINATE_AND_NICOTINAMIDE_METABOLISM	KEGG_NICOTINATE_AND_NICOTINAMIDE_METABOLISM		24	0.428254	1.34916	0.106667	0.261694	0.969	2521	tags=21%, list=5%, signal=22%
KEGG_COMPLEMENT_AND_COAGULATION_CASCADES	KEGG_COMPLEMENT_AND_COAGULATION_CASCADES		69	0.471051	1.34726	0.13035	0.2602	0.97	10501	tags=51%, list=19%, signal=63%
KEGG_AMINO_SUGAR_AND_NUCLEOTIDE_SUGAR_METABOLISM	KEGG_AMINO_SUGAR_AND_NUCLEOTIDE_SUGAR_METABOLISM		43	0.382369	1.32962	0.134969	0.275723	0.975	4808	tags=28%, list=9%, signal=31%
KEGG_PENTOSE_AND_GLUCURONATE_INTERCONVERSIONS	KEGG_PENTOSE_AND_GLUCURONATE_INTERCONVERSIONS		28	0.493395	1.31012	0.164969	0.295376	0.982	9310	tags=46%, list=17%, signal=56%
KEGG_ADIPOCYTOKINE_SIGNALING_PATHWAY	KEGG_ADIPOCYTOKINE_SIGNALING_PATHWAY		67	0.344687	1.30599	0.156538	0.296719	0.982	8796	tags=34%, list=16%, signal=41%
KEGG_GLYCOSPHINGOLIPID_BIOSYNTHESIS_LACTO_AND_NEOLACTO_SERIES	KEGG_GLYCOSPHINGOLIPID_BIOSYNTHESIS_LACTO_AND_NEOLACTO_SERIES		26	0.413377	1.29777	0.149402	0.303267	0.985	5675	tags=27%, list=10%, signal=30%
KEGG_ANTIGEN_PROCESSING_AND_PRESENTATION	KEGG_ANTIGEN_PROCESSING_AND_PRESENTATION		81	0.413794	1.27822	0.220676	0.323132	0.99	14613	tags=44%, list=26%, signal=60%
KEGG_GNRH_SIGNALING_PATHWAY	KEGG_GNRH_SIGNALING_PATHWAY		101	0.299507	1.26933	0.13936	0.330145	0.99	10883	tags=34%, list=20%, signal=42%
KEGG_LEISHMANIA_INFECTION	KEGG_LEISHMANIA_INFECTION		69	0.495163	1.26855	0.282828	0.326989	0.99	11499	tags=54%, list=21%, signal=68%
KEGG_ASCORBATE_AND_ALDARATE_METABOLISM	KEGG_ASCORBATE_AND_ALDARATE_METABOLISM		25	0.49659	1.26435	0.2	0.327423	0.99	11383	tags=48%, list=21%, signal=60%
KEGG_VASOPRESSIN_REGULATED_WATER_REABSORPTION	KEGG_VASOPRESSIN_REGULATED_WATER_REABSORPTION		44	0.340247	1.26088	0.210821	0.32713	0.99	10141	tags=27%, list=18%, signal=33%
KEGG_CITRATE_CYCLE_TCA_CYCLE	KEGG_CITRATE_CYCLE_TCA_CYCLE		31	0.386045	1.25867	0.247465	0.325829	0.99	14241	tags=42%, list=26%, signal=56%
KEGG_GLYCOSAMINOGLYCAN_BIOSYNTHESIS_KERATAN_SULFATE	KEGG_GLYCOSAMINOGLYCAN_BIOSYNTHESIS_KERATAN_SULFATE		15	0.450053	1.25497	0.20198	0.326421	0.99	5675	tags=33%, list=10%, signal=37%
KEGG_VEGF_SIGNALING_PATHWAY	KEGG_VEGF_SIGNALING_PATHWAY		76	0.322323	1.25253	0.182186	0.325177	0.99	5070	tags=21%, list=9%, signal=23%
KEGG_GLYCOSAMINOGLYCAN_BIOSYNTHESIS_CHONDROITIN_SULFATE	KEGG_GLYCOSAMINOGLYCAN_BIOSYNTHESIS_CHONDROITIN_SULFATE		22	0.48433	1.23848	0.262846	0.338021	0.992	5119	tags=41%, list=9%, signal=45%
KEGG_CELL_ADHESION_MOLECULES_CAMS	KEGG_CELL_ADHESION_MOLECULES_CAMS		131	0.448174	1.23621	0.264188	0.336659	0.992	10651	tags=42%, list=19%, signal=52%
KEGG_T_CELL_RECEPTOR_SIGNALING_PATHWAY	KEGG_T_CELL_RECEPTOR_SIGNALING_PATHWAY		108	0.398594	1.23386	0.266537	0.335577	0.992	10264	tags=36%, list=19%, signal=44%
KEGG_SYSTEMIC_LUPUS_ERYTHEMATOSUS	KEGG_SYSTEMIC_LUPUS_ERYTHEMATOSUS		56	0.500483	1.2253	0.291751	0.341667	0.994	12667	tags=55%, list=23%, signal=72%
KEGG_GLYCEROPHOSPHOLIPID_METABOLISM	KEGG_GLYCEROPHOSPHOLIPID_METABOLISM		77	0.302082	1.21885	0.166667	0.345677	0.996	6569	tags=25%, list=12%, signal=28%
KEGG_CYSTEINE_AND_METHIONINE_METABOLISM	KEGG_CYSTEINE_AND_METHIONINE_METABOLISM		34	0.347899	1.20525	0.225296	0.358099	0.998	3815	tags=18%, list=7%, signal=19%
KEGG_TYPE_II_DIABETES_MELLITUS	KEGG_TYPE_II_DIABETES_MELLITUS		47	0.367873	1.18589	0.245714	0.378614	0.998	4782	tags=26%, list=9%, signal=28%
KEGG_LYSOSOME	KEGG_LYSOSOME		121	0.287519	1.18368	0.269076	0.377292	0.998	13286	tags=41%, list=24%, signal=54%
KEGG_FRUCTOSE_AND_MANNOSE_METABOLISM	KEGG_FRUCTOSE_AND_MANNOSE_METABOLISM		33	0.351711	1.17798	0.258064	0.380384	0.998	9174	tags=36%, list=17%, signal=44%
KEGG_DRUG_METABOLISM_OTHER_ENZYMES	KEGG_DRUG_METABOLISM_OTHER_ENZYMES		51	0.385916	1.17356	0.275862	0.381929	0.998	7057	tags=25%, list=13%, signal=29%
KEGG_NUCLEOTIDE_EXCISION_REPAIR	KEGG_NUCLEOTIDE_EXCISION_REPAIR		44	0.343417	1.16141	0.322785	0.393933	0.999	10656	tags=34%, list=19%, signal=42%
KEGG_CYTOKINE_CYTOKINE_RECEPTOR_INTERACTION	KEGG_CYTOKINE_CYTOKINE_RECEPTOR_INTERACTION		263	0.382513	1.16046	0.289157	0.390927	0.999	9096	tags=32%, list=16%, signal=38%
KEGG_PURINE_METABOLISM	KEGG_PURINE_METABOLISM		154	0.246046	1.14052	0.240557	0.412803	1	10656	tags=29%, list=19%, signal=36%
KEGG_RIG_I_LIKE_RECEPTOR_SIGNALING_PATHWAY	KEGG_RIG_I_LIKE_RECEPTOR_SIGNALING_PATHWAY		70	0.298098	1.13848	0.270161	0.411224	1	8496	tags=27%, list=15%, signal=32%
KEGG_VASCULAR_SMOOTH_MUSCLE_CONTRACTION	KEGG_VASCULAR_SMOOTH_MUSCLE_CONTRACTION		115	0.329273	1.12334	0.314394	0.42757	1	10241	tags=37%, list=19%, signal=45%
KEGG_PORPHYRIN_AND_CHLOROPHYLL_METABOLISM	KEGG_PORPHYRIN_AND_CHLOROPHYLL_METABOLISM		40	0.354441	1.12249	0.303534	0.424131	1	9310	tags=35%, list=17%, signal=42%
KEGG_FC_EPSILON_RI_SIGNALING_PATHWAY	KEGG_FC_EPSILON_RI_SIGNALING_PATHWAY		79	0.315687	1.11612	0.34308	0.428395	1	11322	tags=38%, list=21%, signal=48%
KEGG_LONG_TERM_DEPRESSION	KEGG_LONG_TERM_DEPRESSION		70	0.304121	1.10762	0.302103	0.434602	1	9448	tags=31%, list=17%, signal=38%
KEGG_CHEMOKINE_SIGNALING_PATHWAY	KEGG_CHEMOKINE_SIGNALING_PATHWAY		188	0.348361	1.10343	0.370297	0.435971	1	10221	tags=35%, list=19%, signal=42%
KEGG_RNA_DEGRADATION	KEGG_RNA_DEGRADATION		59	0.2599	1.07577	0.362525	0.468672	1	9045	tags=27%, list=16%, signal=32%
KEGG_GRAFT_VERSUS_HOST_DISEASE	KEGG_GRAFT_VERSUS_HOST_DISEASE		37	0.491851	1.07554	0.448898	0.464458	1	12462	tags=54%, list=23%, signal=70%
KEGG_RENIN_ANGIOTENSIN_SYSTEM	KEGG_RENIN_ANGIOTENSIN_SYSTEM		17	0.417753	1.07365	0.380952	0.462534	1	7188	tags=35%, list=13%, signal=41%
KEGG_VIBRIO_CHOLERAE_INFECTION	KEGG_VIBRIO_CHOLERAE_INFECTION		54	0.254076	1.07006	0.353516	0.462839	1	8264	tags=22%, list=15%, signal=26%
KEGG_B_CELL_RECEPTOR_SIGNALING_PATHWAY	KEGG_B_CELL_RECEPTOR_SIGNALING_PATHWAY		75	0.370319	1.06382	0.410959	0.467005	1	10785	tags=37%, list=20%, signal=46%
KEGG_ONE_CARBON_POOL_BY_FOLATE	KEGG_ONE_CARBON_POOL_BY_FOLATE		17	0.379188	1.0626	0.397059	0.464247	1	6612	tags=41%, list=12%, signal=47%
KEGG_HEMATOPOIETIC_CELL_LINEAGE	KEGG_HEMATOPOIETIC_CELL_LINEAGE		85	0.410054	1.04218	0.443137	0.487478	1	7758	tags=35%, list=14%, signal=41%
KEGG_GLYCEROLIPID_METABOLISM	KEGG_GLYCEROLIPID_METABOLISM		49	0.2927	1.02388	0.414634	0.508232	1	6872	tags=24%, list=12%, signal=28%
KEGG_REGULATION_OF_AUTOPHAGY	KEGG_REGULATION_OF_AUTOPHAGY		35	0.293489	1.01985	0.429158	0.509069	1	8764	tags=23%, list=16%, signal=27%
KEGG_HOMOLOGOUS_RECOMBINATION	KEGG_HOMOLOGOUS_RECOMBINATION		28	0.397825	1.01774	0.445148	0.507462	1	10553	tags=39%, list=19%, signal=49%
KEGG_ETHER_LIPID_METABOLISM	KEGG_ETHER_LIPID_METABOLISM		33	0.315098	1.00829	0.437376	0.515915	1	1589	tags=12%, list=3%, signal=12%
KEGG_PANTOTHENATE_AND_COA_BIOSYNTHESIS	KEGG_PANTOTHENATE_AND_COA_BIOSYNTHESIS		16	0.34463	1.00301	0.441237	0.518799	1	4233	tags=19%, list=8%, signal=20%
KEGG_STEROID_HORMONE_BIOSYNTHESIS	KEGG_STEROID_HORMONE_BIOSYNTHESIS		55	0.347012	0.978779	0.468208	0.545998	1	11421	tags=42%, list=21%, signal=53%
KEGG_GLYCOSAMINOGLYCAN_BIOSYNTHESIS_HEPARAN_SULFATE	KEGG_GLYCOSAMINOGLYCAN_BIOSYNTHESIS_HEPARAN_SULFATE		26	0.316865	0.96278	0.489837	0.564073	1	11525	tags=42%, list=21%, signal=53%
KEGG_PRION_DISEASES	KEGG_PRION_DISEASES		35	0.306698	0.950085	0.51341	0.576891	1	12816	tags=40%, list=23%, signal=52%
KEGG_CALCIUM_SIGNALING_PATHWAY	KEGG_CALCIUM_SIGNALING_PATHWAY		177	0.265044	0.950051	0.517891	0.57196	1	10632	tags=31%, list=19%, signal=38%
KEGG_DNA_REPLICATION	KEGG_DNA_REPLICATION		36	0.379209	0.933552	0.570833	0.590846	1	7432	tags=28%, list=13%, signal=32%
KEGG_BETA_ALANINE_METABOLISM	KEGG_BETA_ALANINE_METABOLISM		22	0.312091	0.906146	0.566929	0.626287	1	11383	tags=32%, list=21%, signal=40%
KEGG_PROPANOATE_METABOLISM	KEGG_PROPANOATE_METABOLISM		33	0.304935	0.87952	0.571429	0.659868	1	11383	tags=39%, list=21%, signal=50%
KEGG_GLYCOSAMINOGLYCAN_DEGRADATION	KEGG_GLYCOSAMINOGLYCAN_DEGRADATION		21	0.291397	0.863951	0.635628	0.676859	1	11664	tags=43%, list=21%, signal=54%
KEGG_RETINOL_METABOLISM	KEGG_RETINOL_METABOLISM		64	0.296035	0.840994	0.657426	0.705983	1	10034	tags=31%, list=18%, signal=38%
KEGG_HISTIDINE_METABOLISM	KEGG_HISTIDINE_METABOLISM		29	0.268602	0.830836	0.705882	0.71534	1	4082	tags=21%, list=7%, signal=22%
KEGG_PPAR_SIGNALING_PATHWAY	KEGG_PPAR_SIGNALING_PATHWAY		69	0.241639	0.814705	0.734252	0.73462	1	8551	tags=25%, list=15%, signal=29%
KEGG_ABC_TRANSPORTERS	KEGG_ABC_TRANSPORTERS		44	0.249076	0.810454	0.739563	0.73484	1	8461	tags=30%, list=15%, signal=35%
KEGG_GLYCOSYLPHOSPHATIDYLINOSITOL_GPI_ANCHOR_BIOSYNTHESIS	KEGG_GLYCOSYLPHOSPHATIDYLINOSITOL_GPI_ANCHOR_BIOSYNTHESIS		25	0.268103	0.80502	0.659319	0.737063	1	11917	tags=36%, list=22%, signal=46%
KEGG_AMYOTROPHIC_LATERAL_SCLEROSIS_ALS	KEGG_AMYOTROPHIC_LATERAL_SCLEROSIS_ALS		52	0.203238	0.791794	0.784431	0.750844	1	9257	tags=25%, list=17%, signal=30%
KEGG_DRUG_METABOLISM_CYTOCHROME_P450	KEGG_DRUG_METABOLISM_CYTOCHROME_P450		71	0.258605	0.755366	0.764356	0.795552	1	8549	tags=27%, list=15%, signal=32%
KEGG_ASTHMA	KEGG_ASTHMA		28	0.335458	0.750771	0.708163	0.795718	1	11144	tags=43%, list=20%, signal=54%
KEGG_METABOLISM_OF_XENOBIOTICS_BY_CYTOCHROME_P450	KEGG_METABOLISM_OF_XENOBIOTICS_BY_CYTOCHROME_P450		69	0.261834	0.749015	0.780684	0.792222	1	8549	tags=26%, list=15%, signal=31%
KEGG_ALLOGRAFT_REJECTION	KEGG_ALLOGRAFT_REJECTION		35	0.342326	0.738832	0.695833	0.801036	1	17867	tags=66%, list=32%, signal=97%
KEGG_AMINOACYL_TRNA_BIOSYNTHESIS	KEGG_AMINOACYL_TRNA_BIOSYNTHESIS		22	0.237713	0.692653	0.762397	0.856254	1	11237	tags=32%, list=20%, signal=40%
KEGG_PROTEASOME	KEGG_PROTEASOME		46	0.199761	0.690982	0.724426	0.851799	1	15676	tags=28%, list=28%, signal=39%
KEGG_AUTOIMMUNE_THYROID_DISEASE	KEGG_AUTOIMMUNE_THYROID_DISEASE		50	0.26325	0.686763	0.759834	0.850419	1	14819	tags=38%, list=27%, signal=52%
KEGG_INTESTINAL_IMMUNE_NETWORK_FOR_IGA_PRODUCTION	KEGG_INTESTINAL_IMMUNE_NETWORK_FOR_IGA_PRODUCTION		45	0.26153	0.582137	0.839104	0.948825	1	11238	tags=40%, list=20%, signal=50%
KEGG_SELENOAMINO_ACID_METABOLISM	KEGG_SELENOAMINO_ACID_METABOLISM		25	0.177165	0.563747	0.953935	0.954481	1	4627	tags=12%, list=8%, signal=13%
KEGG_TYPE_I_DIABETES_MELLITUS	KEGG_TYPE_I_DIABETES_MELLITUS		41	0.219959	0.535192	0.889336	0.964181	1	17416	tags=56%, list=32%, signal=82%

## Sheet: TCGA-EGFR-GSEA-C2 KEGG-DOWN
NAME	GS<br> follow link to MSigDB	GS DETAILS	SIZE	ES	NES	NOM p-val	FDR q-val	FWER p-val	RANK AT MAX	LEADING EDGE
KEGG_OXIDATIVE_PHOSPHORYLATION	KEGG_OXIDATIVE_PHOSPHORYLATION	Details ...	131	-0.528513	-2.05019	0	0.00890931	0.018	14495	tags=50%, list=26%, signal=68%
KEGG_PARKINSONS_DISEASE	KEGG_PARKINSONS_DISEASE	Details ...	127	-0.489057	-2.0202	0.00396825	0.00602335	0.022	11153	tags=40%, list=20%, signal=50%
KEGG_ALZHEIMERS_DISEASE	KEGG_ALZHEIMERS_DISEASE	Details ...	165	-0.351419	-1.73297	0.00842105	0.167923	0.422	9840	tags=35%, list=18%, signal=42%
KEGG_HUNTINGTONS_DISEASE	KEGG_HUNTINGTONS_DISEASE	Details ...	180	-0.343014	-1.71834	0.015625	0.143575	0.455	11153	tags=36%, list=20%, signal=44%
KEGG_GLYOXYLATE_AND_DICARBOXYLATE_METABOLISM	KEGG_GLYOXYLATE_AND_DICARBOXYLATE_METABOLISM	Details ...	16	-0.542329	-1.57859	0.0471698	0.325538	0.74	5122	tags=31%, list=9%, signal=34%
KEGG_RIBOSOME	KEGG_RIBOSOME	Details ...	88	-0.564467	-1.56735	0.0526316	0.29233	0.758	18692	tags=75%, list=34%, signal=113%
KEGG_RNA_POLYMERASE	KEGG_RNA_POLYMERASE	Details ...	29	-0.469561	-1.53965	0.0734463	0.299209	0.798	12538	tags=45%, list=23%, signal=58%
KEGG_TERPENOID_BACKBONE_BIOSYNTHESIS	KEGG_TERPENOID_BACKBONE_BIOSYNTHESIS	Details ...	15	-0.601245	-1.46675	0.111776	0.39713	0.886	11798	tags=53%, list=21%, signal=68%
KEGG_CARDIAC_MUSCLE_CONTRACTION	KEGG_CARDIAC_MUSCLE_CONTRACTION	Details ...	78	-0.363071	-1.41597	0.0704225	0.457154	0.928	9731	tags=35%, list=18%, signal=42%
KEGG_TRYPTOPHAN_METABOLISM	KEGG_TRYPTOPHAN_METABOLISM	Details ...	39	-0.408235	-1.32325	0.128	0.616902	0.978	8741	tags=36%, list=16%, signal=43%
KEGG_SNARE_INTERACTIONS_IN_VESICULAR_TRANSPORT	KEGG_SNARE_INTERACTIONS_IN_VESICULAR_TRANSPORT	Details ...	38	-0.270883	-1.18996	0.214286	0.923329	0.998	6101	tags=18%, list=11%, signal=21%
KEGG_PYRUVATE_METABOLISM	KEGG_PYRUVATE_METABOLISM	Details ...	40	-0.331865	-1.16829	0.254582	0.907495	0.999	11746	tags=33%, list=21%, signal=41%
KEGG_ALPHA_LINOLENIC_ACID_METABOLISM	KEGG_ALPHA_LINOLENIC_ACID_METABOLISM	Details ...	19	-0.396959	-1.12637	0.290514	0.956861	0.999	13623	tags=37%, list=25%, signal=49%
KEGG_ARGININE_AND_PROLINE_METABOLISM	KEGG_ARGININE_AND_PROLINE_METABOLISM	Details ...	54	-0.308852	-1.09289	0.349076	0.982031	1	14250	tags=39%, list=26%, signal=52%
KEGG_TYROSINE_METABOLISM	KEGG_TYROSINE_METABOLISM	Details ...	42	-0.312982	-1.05746	0.344758	1	1	14465	tags=43%, list=26%, signal=58%
KEGG_GLYCINE_SERINE_AND_THREONINE_METABOLISM	KEGG_GLYCINE_SERINE_AND_THREONINE_METABOLISM	Details ...	31	-0.362014	-1.00652	0.450304	1	1	7043	tags=19%, list=13%, signal=22%
KEGG_PEROXISOME	KEGG_PEROXISOME	Details ...	78	-0.274886	-1.0016	0.440154	1	1	7577	tags=21%, list=14%, signal=24%
KEGG_MATURITY_ONSET_DIABETES_OF_THE_YOUNG	KEGG_MATURITY_ONSET_DIABETES_OF_THE_YOUNG	Details ...	25	-0.420542	-0.96284	0.50813	1	1	11965	tags=52%, list=22%, signal=66%
KEGG_PHENYLALANINE_METABOLISM	KEGG_PHENYLALANINE_METABOLISM	Details ...	18	-0.319987	-0.957731	0.517647	1	1	10074	tags=33%, list=18%, signal=41%
KEGG_LINOLEIC_ACID_METABOLISM	KEGG_LINOLEIC_ACID_METABOLISM	Details ...	29	-0.346487	-0.944572	0.541582	1	1	13623	tags=31%, list=25%, signal=41%
KEGG_OLFACTORY_TRANSDUCTION	KEGG_OLFACTORY_TRANSDUCTION		386	-0.255801	-0.937373	0.655378	1	1	17883	tags=27%, list=32%, signal=40%
KEGG_OTHER_GLYCAN_DEGRADATION	KEGG_OTHER_GLYCAN_DEGRADATION		16	-0.301133	-0.929655	0.522814	0.978973	1	6356	tags=19%, list=12%, signal=21%
KEGG_PROTEIN_EXPORT	KEGG_PROTEIN_EXPORT		24	-0.316657	-0.929275	0.542339	0.937146	1	4635	tags=17%, list=8%, signal=18%
KEGG_BASE_EXCISION_REPAIR	KEGG_BASE_EXCISION_REPAIR		35	-0.318298	-0.929243	0.558491	0.898215	1	6740	tags=20%, list=12%, signal=23%
KEGG_PROXIMAL_TUBULE_BICARBONATE_RECLAMATION	KEGG_PROXIMAL_TUBULE_BICARBONATE_RECLAMATION		23	-0.342561	-0.926854	0.552846	0.867214	1	9918	tags=30%, list=18%, signal=37%
KEGG_PRIMARY_IMMUNODEFICIENCY	KEGG_PRIMARY_IMMUNODEFICIENCY		35	-0.420148	-0.907925	0.596422	0.873492	1	12935	tags=43%, list=23%, signal=56%
KEGG_BUTANOATE_METABOLISM	KEGG_BUTANOATE_METABOLISM		34	-0.297263	-0.897503	0.58159	0.860599	1	6308	tags=21%, list=11%, signal=23%
KEGG_FATTY_ACID_METABOLISM	KEGG_FATTY_ACID_METABOLISM		42	-0.28458	-0.894042	0.565657	0.83631	1	9940	tags=29%, list=18%, signal=35%
KEGG_PYRIMIDINE_METABOLISM	KEGG_PYRIMIDINE_METABOLISM		98	-0.237261	-0.885325	0.586207	0.823725	1	11039	tags=29%, list=20%, signal=36%
KEGG_ARACHIDONIC_ACID_METABOLISM	KEGG_ARACHIDONIC_ACID_METABOLISM		58	-0.269002	-0.877297	0.627572	0.810584	1	10274	tags=28%, list=19%, signal=34%
KEGG_PRIMARY_BILE_ACID_BIOSYNTHESIS	KEGG_PRIMARY_BILE_ACID_BIOSYNTHESIS		16	-0.336942	-0.859693	0.640404	0.815521	1	9415	tags=31%, list=17%, signal=38%
KEGG_RIBOFLAVIN_METABOLISM	KEGG_RIBOFLAVIN_METABOLISM		16	-0.279099	-0.848192	0.65261	0.810131	1	16069	tags=44%, list=29%, signal=62%
KEGG_NEUROACTIVE_LIGAND_RECEPTOR_INTERACTION	KEGG_NEUROACTIVE_LIGAND_RECEPTOR_INTERACTION		271	-0.237724	-0.825337	0.743852	0.824339	1	14762	tags=35%, list=27%, signal=48%
KEGG_NITROGEN_METABOLISM	KEGG_NITROGEN_METABOLISM		23	-0.284544	-0.811971	0.730526	0.822368	1	6812	tags=26%, list=12%, signal=30%
KEGG_SPLICEOSOME	KEGG_SPLICEOSOME		127	-0.174029	-0.802444	0.613153	0.813925	1	17082	tags=27%, list=31%, signal=39%
KEGG_TASTE_TRANSDUCTION	KEGG_TASTE_TRANSDUCTION		51	-0.250027	-0.775927	0.809013	0.832611	1	12383	tags=31%, list=22%, signal=40%
KEGG_ALANINE_ASPARTATE_AND_GLUTAMATE_METABOLISM	KEGG_ALANINE_ASPARTATE_AND_GLUTAMATE_METABOLISM		30	-0.238969	-0.77521	0.763158	0.81125	1	12027	tags=30%, list=22%, signal=38%
KEGG_GLUTATHIONE_METABOLISM	KEGG_GLUTATHIONE_METABOLISM		49	-0.210788	-0.741013	0.784836	0.840328	1	10349	tags=22%, list=19%, signal=28%
KEGG_STEROID_BIOSYNTHESIS	KEGG_STEROID_BIOSYNTHESIS		17	-0.293053	-0.675658	0.788	0.90793	1	3440	tags=18%, list=6%, signal=19%
KEGG_VALINE_LEUCINE_AND_ISOLEUCINE_DEGRADATION	KEGG_VALINE_LEUCINE_AND_ISOLEUCINE_DEGRADATION		44	-0.216923	-0.660425	0.835417	0.902438	1	9202	tags=23%, list=17%, signal=27%
KEGG_CYTOSOLIC_DNA_SENSING_PATHWAY	KEGG_CYTOSOLIC_DNA_SENSING_PATHWAY		54	-0.183404	-0.62292	0.928854	0.919901	1	10682	tags=19%, list=19%, signal=23%
KEGG_GLYCOSPHINGOLIPID_BIOSYNTHESIS_GANGLIO_SERIES	KEGG_GLYCOSPHINGOLIPID_BIOSYNTHESIS_GANGLIO_SERIES		15	-0.211565	-0.565312	0.951923	0.944122	1	8743	tags=20%, list=16%, signal=24%

## Sheet: TCGA-EGFR-GSEA-C3 TFT-UP
NAME	GS<br> follow link to MSigDB	GS DETAILS	SIZE	ES	NES	NOM p-val	FDR q-val	FWER p-val	RANK AT MAX	LEADING EDGE
TAANNYSGCG_UNKNOWN	TAANNYSGCG_UNKNOWN	Details ...	79	0.573866	2.30631	0	0.00487055	0.002	10248	tags=52%, list=19%, signal=64%
EMX1_TARGET_GENES	EMX1_TARGET_GENES	Details ...	219	0.52878	2.29691	0	0.00243528	0.002	10035	tags=46%, list=18%, signal=56%
ATCMNTCCGY_UNKNOWN	ATCMNTCCGY_UNKNOWN	Details ...	51	0.584421	2.27826	0	0.00162352	0.002	5034	tags=35%, list=9%, signal=39%
ATF5_TARGET_GENES	ATF5_TARGET_GENES	Details ...	427	0.474994	2.1524	0	0.00230873	0.005	9727	tags=41%, list=18%, signal=49%
F10_TARGET_GENES	F10_TARGET_GENES	Details ...	267	0.550853	2.13042	0	0.00291541	0.009	10410	tags=49%, list=19%, signal=60%
CEBPA_01	CEBPA_01	Details ...	251	0.53724	2.05959	0	0.00928481	0.025	9546	tags=46%, list=17%, signal=55%
CETS1P54_01	CETS1P54_01	Details ...	263	0.371074	2.0477	0.00208333	0.0096699	0.029	9913	tags=38%, list=18%, signal=46%
ZNF622_TARGET_GENES	ZNF622_TARGET_GENES	Details ...	64	0.525226	2.03851	0	0.00908481	0.031	9507	tags=45%, list=17%, signal=55%
NRF2_01	NRF2_01	Details ...	272	0.343471	2.03327	0.00205339	0.0101618	0.035	6245	tags=23%, list=11%, signal=26%
GKCGCNNNNNNNTGAYG_UNKNOWN	GKCGCNNNNNNNTGAYG_UNKNOWN	Details ...	58	0.514438	2.03035	0.00809717	0.0100422	0.037	13826	tags=48%, list=25%, signal=64%
CEBPB_02	CEBPB_02	Details ...	259	0.523501	2.01976	0	0.0101903	0.041	9493	tags=45%, list=17%, signal=54%
GGCNKCCATNK_UNKNOWN	GGCNKCCATNK_UNKNOWN	Details ...	121	0.461415	2.01691	0	0.0101679	0.044	7767	tags=34%, list=14%, signal=39%
ZSCAN5C_TARGET_GENES	ZSCAN5C_TARGET_GENES	Details ...	142	0.471204	2.01568	0.002079	0.00955031	0.045	8452	tags=37%, list=15%, signal=44%
RRCCGTTA_UNKNOWN	RRCCGTTA_UNKNOWN	Details ...	88	0.47192	2.01308	0	0.00909215	0.047	10059	tags=48%, list=18%, signal=58%
GLI1_TARGET_GENES	GLI1_TARGET_GENES	Details ...	69	0.575475	2.01268	0	0.008486	0.047	8199	tags=36%, list=15%, signal=43%
MSX1_TARGET_GENES	MSX1_TARGET_GENES	Details ...	192	0.481409	2.00791	0	0.00846628	0.05	7942	tags=37%, list=14%, signal=43%
CEBP_Q2_01	CEBP_Q2_01	Details ...	267	0.517515	2.00663	0	0.00829575	0.052	10322	tags=45%, list=19%, signal=55%
TTGCWCAAY_CEBPB_02	TTGCWCAAY_CEBPB_02	Details ...	63	0.575628	2.00408	0	0.00812518	0.052	6513	tags=40%, list=12%, signal=45%
E2F_02	E2F_02	Details ...	230	0.477215	1.99102	0	0.00891191	0.056	8192	tags=37%, list=15%, signal=44%
E2F1DP1_01	E2F1DP1_01	Details ...	230	0.476996	1.99092	0	0.00846631	0.056	8192	tags=37%, list=15%, signal=44%
E2F1DP2_01	E2F1DP2_01	Details ...	230	0.476996	1.99092	0	0.00806315	0.056	8192	tags=37%, list=15%, signal=44%
E2F4DP2_01	E2F4DP2_01	Details ...	230	0.476996	1.99092	0	0.00769665	0.056	8192	tags=37%, list=15%, signal=44%
E2F1_Q6	E2F1_Q6	Details ...	228	0.493387	1.9831	0	0.00788323	0.06	8321	tags=39%, list=15%, signal=46%
SOX5_01	SOX5_01	Details ...	265	0.517298	1.97498	0	0.00804959	0.064	8391	tags=42%, list=15%, signal=49%
STAT1_02	STAT1_02	Details ...	259	0.373542	1.97247	0	0.00776613	0.064	10785	tags=34%, list=20%, signal=43%
YNGTTNNNATT_UNKNOWN	YNGTTNNNATT_UNKNOWN	Details ...	372	0.505284	1.97128	0	0.00751466	0.064	9511	tags=42%, list=17%, signal=51%
GABP_B	GABP_B	Details ...	262	0.361815	1.96848	0.0021322	0.00739914	0.066	8221	tags=31%, list=15%, signal=36%
GR_Q6_01	GR_Q6_01	Details ...	278	0.448931	1.96014	0	0.00813967	0.075	7708	tags=32%, list=14%, signal=37%
CRGAARNNNNCGA_UNKNOWN	CRGAARNNNNCGA_UNKNOWN	Details ...	46	0.432574	1.94967	0	0.00897132	0.084	9721	tags=41%, list=18%, signal=50%
E2F_Q6	E2F_Q6	Details ...	227	0.480548	1.93209	0.00414938	0.0106574	0.098	7544	tags=36%, list=14%, signal=41%
E2F4DP1_01	E2F4DP1_01	Details ...	234	0.464752	1.93193	0.00209205	0.0103136	0.098	8192	tags=37%, list=15%, signal=43%
SOX3_TARGET_GENES	SOX3_TARGET_GENES	Details ...	100	0.463554	1.92917	0.00202429	0.0103855	0.1	6731	tags=31%, list=12%, signal=35%
E2F1_Q4_01	E2F1_Q4_01	Details ...	220	0.45595	1.92745	0.00408998	0.0103859	0.104	8112	tags=35%, list=15%, signal=41%
SOX10_TARGET_GENES	SOX10_TARGET_GENES	Details ...	291	0.430217	1.92563	0	0.0103484	0.108	7826	tags=32%, list=14%, signal=37%
E2F_Q4	E2F_Q4	Details ...	231	0.476629	1.9218	0.004158	0.010148	0.109	7534	tags=35%, list=14%, signal=40%
ARNT_02	ARNT_02	Details ...	251	0.381118	1.92103	0	0.00990195	0.11	7886	tags=32%, list=14%, signal=37%
GGCNNMSMYNTTG_UNKNOWN	GGCNNMSMYNTTG_UNKNOWN	Details ...	75	0.444694	1.9186	0.00428265	0.0101303	0.117	7528	tags=33%, list=14%, signal=39%
STAT5A_03	STAT5A_03	Details ...	266	0.473484	1.91554	0	0.0102367	0.12	7839	tags=37%, list=14%, signal=43%
E2F_Q3_01	E2F_Q3_01	Details ...	226	0.451397	1.90826	0.00411523	0.0107853	0.13	9763	tags=39%, list=18%, signal=48%
KCCGNSWTTT_UNKNOWN	KCCGNSWTTT_UNKNOWN	Details ...	107	0.433039	1.90688	0.010142	0.0107496	0.133	7708	tags=36%, list=14%, signal=41%
HAND1_TARGET_GENES	HAND1_TARGET_GENES	Details ...	456	0.385536	1.90509	0	0.0106105	0.135	9180	tags=33%, list=17%, signal=39%
USF_02	USF_02	Details ...	272	0.392185	1.90405	0	0.0105119	0.138	7067	tags=31%, list=13%, signal=35%
ATGGYGGA_UNKNOWN	ATGGYGGA_UNKNOWN	Details ...	105	0.430515	1.90382	0	0.0103122	0.139	8589	tags=40%, list=16%, signal=47%
LCORL_TARGET_GENES	LCORL_TARGET_GENES	Details ...	440	0.362091	1.90194	0	0.0101836	0.141	9157	tags=34%, list=17%, signal=41%
ELK1_02	ELK1_02	Details ...	254	0.361602	1.89734	0.00207039	0.0103615	0.149	7844	tags=30%, list=14%, signal=34%
GCGSCMNTTT_UNKNOWN	GCGSCMNTTT_UNKNOWN	Details ...	70	0.482885	1.89276	0	0.0104936	0.151	9172	tags=41%, list=17%, signal=50%
AP3_Q6	AP3_Q6	Details ...	247	0.469917	1.89077	0	0.0105393	0.153	10268	tags=46%, list=19%, signal=56%
ARGGGTTAA_UNKNOWN	ARGGGTTAA_UNKNOWN	Details ...	118	0.48861	1.8866	0	0.010642	0.156	6909	tags=33%, list=13%, signal=38%
DLX2_TARGET_GENES	DLX2_TARGET_GENES	Details ...	274	0.494843	1.88656	0	0.0104248	0.156	8800	tags=43%, list=16%, signal=51%
CHAMP1_TARGET_GENES	CHAMP1_TARGET_GENES	Details ...	196	0.469973	1.88646	0	0.0102434	0.156	6547	tags=32%, list=12%, signal=36%
CSHL1_TARGET_GENES	CSHL1_TARGET_GENES	Details ...	233	0.38709	1.88635	0	0.0100425	0.156	6577	tags=29%, list=12%, signal=33%
GFI1_01	GFI1_01	Details ...	261	0.480378	1.88499	0.00407332	0.00994851	0.157	7448	tags=37%, list=13%, signal=42%
TCF1P_Q6	TCF1P_Q6	Details ...	264	0.412771	1.88375	0	0.00984571	0.157	10211	tags=40%, list=19%, signal=49%
USF_01	USF_01	Details ...	261	0.370044	1.88315	0.00421941	0.00972507	0.158	7560	tags=30%, list=14%, signal=35%
SOX9_B1	SOX9_B1	Details ...	234	0.476793	1.8786	0	0.0103115	0.169	9835	tags=44%, list=18%, signal=54%
CEBPGAMMA_Q6	CEBPGAMMA_Q6	Details ...	254	0.455488	1.87617	0	0.0103571	0.172	8241	tags=34%, list=15%, signal=40%
CCAATNNSNNNGCG_UNKNOWN	CCAATNNSNNNGCG_UNKNOWN	Details ...	59	0.460528	1.87472	0.00206186	0.0103839	0.173	5428	tags=29%, list=10%, signal=32%
FREAC7_01	FREAC7_01	Details ...	198	0.456827	1.8674	0	0.0116307	0.189	7623	tags=32%, list=14%, signal=37%
SGCGSSAAA_E2F1DP2_01	SGCGSSAAA_E2F1DP2_01	Details ...	163	0.454719	1.86438	0.00407332	0.0117977	0.193	8192	tags=35%, list=15%, signal=41%
CCAWNWWNNNGGC_UNKNOWN	CCAWNWWNNNGGC_UNKNOWN	Details ...	85	0.407757	1.864	0.00205339	0.011707	0.195	9172	tags=36%, list=17%, signal=44%
MAF_Q6	MAF_Q6	Details ...	260	0.440525	1.86099	0	0.0119578	0.199	9665	tags=40%, list=18%, signal=48%
PRMT5_TARGET_GENES	PRMT5_TARGET_GENES	Details ...	84	0.506341	1.86067	0.00422833	0.011765	0.199	11555	tags=50%, list=21%, signal=63%
ZNF26_TARGET_GENES	ZNF26_TARGET_GENES	Details ...	29	0.597165	1.85514	0.00394477	0.0124234	0.21	4945	tags=31%, list=9%, signal=34%
TCANNTGAY_SREBP1_01	TCANNTGAY_SREBP1_01	Details ...	468	0.386828	1.85414	0	0.0124124	0.213	7971	tags=31%, list=14%, signal=36%
ICSBP_Q6	ICSBP_Q6	Details ...	251	0.48259	1.85323	0	0.0123748	0.216	8330	tags=40%, list=15%, signal=47%
RYAAAKNNNNNNTTGW_UNKNOWN	RYAAAKNNNNNNTTGW_UNKNOWN	Details ...	83	0.51652	1.85321	0	0.0121873	0.216	9186	tags=43%, list=17%, signal=52%
CEBPB_01	CEBPB_01	Details ...	262	0.454653	1.8492	0	0.0127901	0.224	10214	tags=40%, list=19%, signal=49%
RGAANNTTC_HSF1_01	RGAANNTTC_HSF1_01	Details ...	453	0.42824	1.8445	0.00206612	0.0132733	0.23	8158	tags=35%, list=15%, signal=40%
AAGWWRNYGGC_UNKNOWN	AAGWWRNYGGC_UNKNOWN	Details ...	119	0.413377	1.84357	0.00411523	0.0132019	0.231	10248	tags=39%, list=19%, signal=48%
PAX5_01	PAX5_01	Details ...	154	0.415624	1.84334	0	0.0130287	0.231	10325	tags=44%, list=19%, signal=53%
NR0B1_TARGET_GENES	NR0B1_TARGET_GENES	Details ...	357	0.381498	1.84246	0	0.0132142	0.235	8226	tags=32%, list=15%, signal=37%
HIF1_Q5	HIF1_Q5	Details ...	248	0.379424	1.84134	0	0.0132809	0.24	6517	tags=28%, list=12%, signal=32%
AFP1_Q6	AFP1_Q6	Details ...	265	0.474118	1.84099	0	0.0131148	0.24	9680	tags=40%, list=18%, signal=49%
STAT6_01	STAT6_01	Details ...	267	0.432436	1.83958	0	0.0131593	0.241	8483	tags=36%, list=15%, signal=42%
POU1F1_Q6	POU1F1_Q6	Details ...	235	0.435356	1.83703	0	0.0134182	0.245	7257	tags=32%, list=13%, signal=37%
E4BP4_01	E4BP4_01	Details ...	218	0.462405	1.83694	0.00413223	0.0132572	0.245	9813	tags=43%, list=18%, signal=52%
E2F_Q4_01	E2F_Q4_01	Details ...	232	0.425928	1.83495	0.00616016	0.0134499	0.25	8372	tags=33%, list=15%, signal=39%
COMP1_01	COMP1_01	Details ...	117	0.506165	1.8337	0.00205761	0.0134875	0.253	6887	tags=36%, list=12%, signal=41%
E2F_01	E2F_01	Details ...	62	0.485322	1.83359	0.00196464	0.0133487	0.253	6516	tags=34%, list=12%, signal=38%
E2F1DP1RB_01	E2F1DP1RB_01	Details ...	227	0.427499	1.83296	0.00613497	0.0132623	0.255	8192	tags=33%, list=15%, signal=38%
PR_02	PR_02	Details ...	135	0.483824	1.83134	0	0.0134648	0.26	8589	tags=42%, list=16%, signal=50%
MAX_01	MAX_01	Details ...	261	0.375239	1.83051	0.00423729	0.0134541	0.263	8095	tags=33%, list=15%, signal=39%
PAX2_TARGET_GENES	PAX2_TARGET_GENES	Details ...	100	0.49482	1.83012	0.00409836	0.013405	0.263	7942	tags=33%, list=14%, signal=38%
SREBP1_02	SREBP1_02	Details ...	85	0.445901	1.82749	0	0.0137427	0.268	4806	tags=26%, list=9%, signal=28%
SREBP1_01	SREBP1_01	Details ...	168	0.373771	1.82721	0.012474	0.0136095	0.27	8246	tags=32%, list=15%, signal=38%
WHN_B	WHN_B	Details ...	255	0.409843	1.82716	0	0.0134649	0.27	11029	tags=43%, list=20%, signal=53%
AR_03	AR_03	Details ...	58	0.497852	1.82649	0	0.0134632	0.272	7708	tags=38%, list=14%, signal=44%
E2F1_Q6_01	E2F1_Q6_01	Details ...	239	0.420125	1.82258	0.0102249	0.0137614	0.281	8112	tags=34%, list=15%, signal=40%
GAANYNYGACNY_UNKNOWN	GAANYNYGACNY_UNKNOWN	Details ...	75	0.48988	1.82105	0.00205339	0.0138256	0.285	10205	tags=49%, list=18%, signal=60%
GRE_C	GRE_C	Details ...	128	0.47531	1.81529	0.00210084	0.0145119	0.297	8491	tags=38%, list=15%, signal=45%
TTAYRTAA_E4BP4_01	TTAYRTAA_E4BP4_01	Details ...	264	0.45634	1.8133	0.00411523	0.0146651	0.3	10143	tags=42%, list=18%, signal=51%
FREAC2_01	FREAC2_01	Details ...	260	0.460909	1.80957	0	0.0148665	0.304	10406	tags=39%, list=19%, signal=48%
WGGAATGY_TEF1_Q6	WGGAATGY_TEF1_Q6	Details ...	382	0.432581	1.80769	0.00215983	0.0150836	0.307	8945	tags=37%, list=16%, signal=44%
FOXO1_02	FOXO1_02	Details ...	243	0.43077	1.80629	0	0.01514	0.309	9960	tags=37%, list=18%, signal=45%
ZNF236_TARGET_GENES	ZNF236_TARGET_GENES	Details ...	253	0.393738	1.80414	0.00409836	0.0154196	0.311	9820	tags=39%, list=18%, signal=47%
GR_01	GR_01	Details ...	200	0.455415	1.80356	0.00204082	0.0152986	0.311	9161	tags=40%, list=17%, signal=48%
ETF_Q6	ETF_Q6	Details ...	118	0.476366	1.80322	0.022	0.0152127	0.313	10804	tags=43%, list=20%, signal=54%
HSF2_TARGET_GENES	HSF2_TARGET_GENES	Details ...	235	0.388355	1.79925	0	0.0156975	0.322	8483	tags=31%, list=15%, signal=36%
TERF2_TARGET_GENES	TERF2_TARGET_GENES	Details ...	129	0.496034	1.79743	0.00773694	0.0157716	0.323	8013	tags=40%, list=15%, signal=47%
P53_02	P53_02	Details ...	250	0.38745	1.79649	0	0.0157179	0.324	8308	tags=32%, list=15%, signal=38%
AREB6_04	AREB6_04		246	0.462552	1.79611	0.00612245	0.015595	0.324	10704	tags=44%, list=19%, signal=54%
XBP1_01	XBP1_01		134	0.410088	1.79608	0.00208768	0.0154421	0.324	8015	tags=32%, list=15%, signal=37%
CIZ_01	CIZ_01		249	0.426923	1.79497	0.00416667	0.0154309	0.328	8632	tags=36%, list=16%, signal=43%
FOXJ2_02	FOXJ2_02		241	0.478698	1.79427	0.002079	0.015455	0.33	9692	tags=39%, list=18%, signal=47%
HIF1_Q3	HIF1_Q3		234	0.389817	1.79357	0.00423729	0.0154005	0.331	6588	tags=31%, list=12%, signal=35%
ELF5_TARGET_GENES	ELF5_TARGET_GENES		452	0.341859	1.79353	0.00595238	0.0152552	0.331	10572	tags=36%, list=19%, signal=44%
CHOP_01	CHOP_01		226	0.450165	1.7918	0.00209644	0.0153062	0.332	9517	tags=38%, list=17%, signal=46%
HLF_01	HLF_01		255	0.455961	1.79171	0.00838574	0.0151645	0.332	10096	tags=40%, list=18%, signal=49%
TEF1_Q6	TEF1_Q6		221	0.443619	1.79089	0	0.0151671	0.333	10664	tags=41%, list=19%, signal=51%
P53_DECAMER_Q2	P53_DECAMER_Q2		253	0.40768	1.79089	0	0.0150293	0.333	9244	tags=36%, list=17%, signal=43%
HOXC13_TARGET_GENES	HOXC13_TARGET_GENES		114	0.415985	1.79046	0.00806452	0.0149384	0.333	7368	tags=39%, list=13%, signal=44%
TGIF_01	TGIF_01		247	0.426228	1.78991	0	0.0148913	0.334	9403	tags=37%, list=17%, signal=45%
STAT_01	STAT_01		253	0.408266	1.78919	0	0.0148452	0.335	6939	tags=30%, list=13%, signal=35%
NFAT_Q6	NFAT_Q6		242	0.451324	1.78619	0.00425532	0.0152078	0.343	10458	tags=40%, list=19%, signal=50%
KMCATNNWGGA_UNKNOWN	KMCATNNWGGA_UNKNOWN		94	0.481429	1.78575	0.0041841	0.0151456	0.343	8937	tags=46%, list=16%, signal=54%
CATTGTYY_SOX9_B1	CATTGTYY_SOX9_B1		362	0.452907	1.78202	0.00619835	0.0157138	0.356	9164	tags=41%, list=17%, signal=49%
GR_Q6	GR_Q6		269	0.429848	1.776	0	0.0166782	0.369	7933	tags=32%, list=14%, signal=38%
TEF_Q6	TEF_Q6		257	0.427943	1.77581	0.00408998	0.0165634	0.369	5924	tags=27%, list=11%, signal=30%
GCCATNTTG_YY1_Q6	GCCATNTTG_YY1_Q6		433	0.358756	1.7752	0.0128205	0.016483	0.37	8540	tags=31%, list=15%, signal=37%
KDM1B_TARGET_GENES	KDM1B_TARGET_GENES		155	0.397308	1.77457	0.00215054	0.0164295	0.371	9754	tags=37%, list=18%, signal=45%
AHRARNT_01	AHRARNT_01		140	0.423091	1.77418	0	0.0163787	0.372	5567	tags=31%, list=10%, signal=34%
FOX_Q2	FOX_Q2		210	0.47391	1.77385	0.00407332	0.0162541	0.372	8957	tags=38%, list=16%, signal=45%
YYCATTCAWW_UNKNOWN	YYCATTCAWW_UNKNOWN		190	0.442976	1.77383	0.00421941	0.0161306	0.372	6780	tags=33%, list=12%, signal=38%
IRF1_01	IRF1_01		251	0.442444	1.77326	0.00390625	0.0161612	0.372	11374	tags=43%, list=21%, signal=54%
HNF4ALPHA_Q6	HNF4ALPHA_Q6		267	0.399157	1.77152	0.00204918	0.0162813	0.376	8255	tags=34%, list=15%, signal=39%
YAATNANRNNNCAG_UNKNOWN	YAATNANRNNNCAG_UNKNOWN		64	0.45364	1.77142	0	0.0161927	0.376	10543	tags=41%, list=19%, signal=50%
CMYB_01	CMYB_01		250	0.369921	1.77124	0.00210084	0.0161644	0.376	9977	tags=37%, list=18%, signal=45%
ISRE_01	ISRE_01		250	0.460673	1.76913	0.004	0.016315	0.38	8350	tags=38%, list=15%, signal=45%
POU3F2_02	POU3F2_02		258	0.440902	1.76881	0.00212766	0.0161968	0.38	8095	tags=33%, list=15%, signal=38%
TCF4_Q5	TCF4_Q5		238	0.428163	1.76825	0.00201207	0.0161368	0.38	8277	tags=35%, list=15%, signal=41%
CEBPE_TARGET_GENES	CEBPE_TARGET_GENES		32	0.602468	1.76475	0.00594059	0.0165597	0.393	4892	tags=34%, list=9%, signal=38%
FOXO1_01	FOXO1_01		239	0.446638	1.76261	0	0.0168728	0.402	7623	tags=34%, list=14%, signal=40%
CEBP_Q2	CEBP_Q2		231	0.458325	1.76216	0	0.0167965	0.402	11505	tags=45%, list=21%, signal=57%
HNF6_Q6	HNF6_Q6		235	0.452527	1.76201	0.00206612	0.0167153	0.402	10572	tags=43%, list=19%, signal=53%
EVI1_02	EVI1_02		134	0.43215	1.76201	0.00406504	0.0165915	0.402	9942	tags=40%, list=18%, signal=48%
IK2_01	IK2_01		262	0.413852	1.75957	0.00209644	0.0169337	0.408	7630	tags=33%, list=14%, signal=38%
FREAC4_01	FREAC4_01		151	0.492329	1.75701	0.00407332	0.0173299	0.413	8957	tags=40%, list=16%, signal=47%
CEBP_Q3	CEBP_Q3		252	0.430054	1.75623	0	0.0172868	0.413	9286	tags=37%, list=17%, signal=45%
BCL6B_TARGET_GENES	BCL6B_TARGET_GENES		162	0.390964	1.75473	0	0.017437	0.418	8663	tags=36%, list=16%, signal=42%
IRF2_01	IRF2_01		125	0.470853	1.7541	0.00591716	0.0173861	0.42	9105	tags=38%, list=16%, signal=46%
BACH1_01	BACH1_01		258	0.399255	1.75285	0	0.0175106	0.426	8186	tags=33%, list=15%, signal=39%
IRF_Q6	IRF_Q6		242	0.485218	1.75215	0.015873	0.017492	0.427	8350	tags=38%, list=15%, signal=45%
ZBTB1_TARGET_GENES	ZBTB1_TARGET_GENES		113	0.377766	1.75043	0.0021692	0.0177503	0.431	5264	tags=27%, list=10%, signal=30%
ZSCAN21_TARGET_GENES	ZSCAN21_TARGET_GENES		483	0.354162	1.74982	0	0.0177593	0.432	7393	tags=30%, list=13%, signal=34%
BRN2_01	BRN2_01		235	0.439823	1.74849	0	0.0178313	0.433	9053	tags=37%, list=16%, signal=44%
ARNT_01	ARNT_01		266	0.351305	1.74769	0.00428265	0.0179274	0.436	7067	tags=29%, list=13%, signal=33%
TSHZ1_TARGET_GENES	TSHZ1_TARGET_GENES		225	0.366221	1.74646	0	0.0180268	0.439	5855	tags=27%, list=11%, signal=30%
TAAYNRNNTCC_UNKNOWN	TAAYNRNNTCC_UNKNOWN		171	0.437544	1.74595	0.00209644	0.0179641	0.442	9172	tags=39%, list=17%, signal=47%
FOXD3_01	FOXD3_01		200	0.465838	1.74578	0	0.0178596	0.442	8341	tags=38%, list=15%, signal=45%
CDC5_01	CDC5_01		263	0.468017	1.7442	0.00625	0.0180841	0.447	8147	tags=36%, list=15%, signal=42%
PBX1_01	PBX1_01		257	0.417451	1.7424	0.00204918	0.0182453	0.451	9824	tags=38%, list=18%, signal=46%
GCTNWTTGK_UNKNOWN	GCTNWTTGK_UNKNOWN		304	0.372143	1.74205	0.0020284	0.018184	0.452	11086	tags=37%, list=20%, signal=46%
E2F1_Q3	E2F1_Q3		240	0.40012	1.74061	0.0181452	0.0183173	0.456	8949	tags=35%, list=16%, signal=42%
PXR_Q2	PXR_Q2		256	0.401499	1.74018	0.00414938	0.0182613	0.457	10714	tags=41%, list=19%, signal=50%
HNF3ALPHA_Q6	HNF3ALPHA_Q6		207	0.441489	1.74016	0.00201613	0.0181435	0.457	10381	tags=38%, list=19%, signal=47%
PITX2_Q2	PITX2_Q2		257	0.437281	1.73979	0.00413223	0.0181157	0.457	7542	tags=33%, list=14%, signal=39%
ZFP28_TARGET_GENES	ZFP28_TARGET_GENES		115	0.422353	1.73921	0	0.0181077	0.457	5519	tags=28%, list=10%, signal=31%
CEBP_C	CEBP_C		201	0.448292	1.7392	0.00215983	0.0179991	0.457	6503	tags=33%, list=12%, signal=37%
SRY_02	SRY_02		255	0.469765	1.73724	0.00816326	0.0182762	0.463	9416	tags=42%, list=17%, signal=51%
STTTCRNTTT_IRF_Q6	STTTCRNTTT_IRF_Q6		189	0.483652	1.73688	0.011811	0.0182211	0.463	8330	tags=41%, list=15%, signal=48%
NF1_Q6_01	NF1_Q6_01		268	0.404766	1.73651	0.00421053	0.0181379	0.463	11525	tags=42%, list=21%, signal=53%
CCGNMNNTNACG_UNKNOWN	CCGNMNNTNACG_UNKNOWN		77	0.369143	1.73541	0.00795229	0.0181716	0.465	12816	tags=43%, list=23%, signal=56%
ALX4_TARGET_GENES	ALX4_TARGET_GENES		31	0.600149	1.73063	0.0040404	0.0191138	0.481	9974	tags=45%, list=18%, signal=55%
NFMUE1_Q6	NFMUE1_Q6		245	0.340763	1.73025	0.0258964	0.0190395	0.481	10248	tags=34%, list=19%, signal=41%
CCTNTMAGA_UNKNOWN	CCTNTMAGA_UNKNOWN		133	0.415912	1.72982	0.00613497	0.0190302	0.481	4105	tags=26%, list=7%, signal=28%
LYF1_01	LYF1_01		270	0.396453	1.72948	0	0.0189644	0.481	8486	tags=37%, list=15%, signal=44%
DBP_Q6	DBP_Q6		260	0.421679	1.72833	0.0020202	0.0190802	0.484	11419	tags=43%, list=21%, signal=54%
YKACATTT_UNKNOWN	YKACATTT_UNKNOWN		285	0.427546	1.7278	0.00215054	0.0190584	0.486	10280	tags=41%, list=19%, signal=50%
PBX1_02	PBX1_02		131	0.443457	1.72772	0	0.0189594	0.486	6916	tags=31%, list=13%, signal=36%
CDPCR3HD_01	CDPCR3HD_01		236	0.420736	1.72447	0.00211864	0.0194112	0.5	7793	tags=33%, list=14%, signal=39%
SMAD_Q6	SMAD_Q6		254	0.415429	1.7206	0.00631579	0.0201584	0.515	8817	tags=33%, list=16%, signal=40%
CRX_Q4	CRX_Q4		271	0.411742	1.7205	0.00211864	0.0200541	0.515	10233	tags=37%, list=19%, signal=45%
CGTSACG_PAX3_B	CGTSACG_PAX3_B		148	0.390821	1.7193	0.0063425	0.0201535	0.517	9903	tags=39%, list=18%, signal=47%
NFY_Q6_01	NFY_Q6_01		252	0.336959	1.71755	0.00410678	0.0203589	0.519	9779	tags=33%, list=18%, signal=40%
DR3_Q4	DR3_Q4		146	0.392969	1.71608	0	0.0205021	0.523	9065	tags=36%, list=16%, signal=43%
FREAC3_01	FREAC3_01		251	0.419072	1.71558	0	0.0204476	0.523	9875	tags=38%, list=18%, signal=46%
TCCATTKW_UNKNOWN	TCCATTKW_UNKNOWN		237	0.415914	1.7155	0.00854701	0.0203321	0.523	9990	tags=40%, list=18%, signal=48%
HFH4_01	HFH4_01		201	0.449143	1.71517	0.00413223	0.0203037	0.525	8139	tags=31%, list=15%, signal=36%
AAAYWAACM_HFH4_01	AAAYWAACM_HFH4_01		256	0.46086	1.71385	0.00816326	0.0204967	0.529	7638	tags=31%, list=14%, signal=36%
FAC1_01	FAC1_01		221	0.429259	1.71291	0.00416667	0.020635	0.533	6114	tags=27%, list=11%, signal=30%
TTCYRGAA_UNKNOWN	TTCYRGAA_UNKNOWN		330	0.370554	1.71277	0.00614754	0.0205329	0.533	9558	tags=36%, list=17%, signal=43%
USF2_Q6	USF2_Q6		249	0.348416	1.71211	0.00202429	0.0205236	0.535	7030	tags=29%, list=13%, signal=33%
E2F1_Q4	E2F1_Q4		245	0.360633	1.71211	0.00801603	0.0204245	0.535	7651	tags=29%, list=14%, signal=33%
SS18_SSX1_FUSION_TARGET_GENES	SS18_SSX1_FUSION_TARGET_GENES		390	0.361937	1.71184	0.00215054	0.0203578	0.535	6067	tags=26%, list=11%, signal=29%
MEIS1_01	MEIS1_01		243	0.416028	1.71073	0.00407332	0.0204747	0.536	8295	tags=33%, list=15%, signal=39%
IK1_01	IK1_01		281	0.382737	1.70974	0	0.0205265	0.536	7728	tags=32%, list=14%, signal=37%
IRX2_TARGET_GENES	IRX2_TARGET_GENES		223	0.348157	1.70869	0.00809717	0.0206261	0.54	7563	tags=27%, list=14%, signal=31%
BACH2_01	BACH2_01		268	0.387266	1.70807	0	0.0206259	0.542	11796	tags=40%, list=21%, signal=51%
LXR_Q3	LXR_Q3		76	0.443358	1.70309	0.00431035	0.0215213	0.552	7630	tags=36%, list=14%, signal=41%
MMEF2_Q6	MMEF2_Q6		271	0.41419	1.70268	0.0021322	0.0214759	0.552	7546	tags=33%, list=14%, signal=38%
STAT1_03	STAT1_03		250	0.346109	1.70126	0	0.0216408	0.555	9816	tags=34%, list=18%, signal=41%
PAX4_04	PAX4_04		219	0.453013	1.69929	0.00851064	0.0219513	0.564	8957	tags=36%, list=16%, signal=42%
STAT_Q6	STAT_Q6		260	0.373709	1.69776	0.00210526	0.0221329	0.569	10059	tags=36%, list=18%, signal=44%
FOXO4_01	FOXO4_01		242	0.419418	1.69753	0	0.022089	0.57	7715	tags=31%, list=14%, signal=36%
MYCMAX_02	MYCMAX_02		266	0.37201	1.69679	0.00214592	0.0221515	0.57	7715	tags=29%, list=14%, signal=33%
RRAGTTGT_UNKNOWN	RRAGTTGT_UNKNOWN		253	0.412471	1.69644	0.00851064	0.0221245	0.572	10847	tags=42%, list=20%, signal=52%
ER_Q6_01	ER_Q6_01		274	0.375542	1.69306	0	0.0229736	0.582	10656	tags=36%, list=19%, signal=45%
CCAWYNNGAAR_UNKNOWN	CCAWYNNGAAR_UNKNOWN		144	0.3583	1.69232	0	0.0230355	0.586	10378	tags=40%, list=19%, signal=49%
AAANWWTGC_UNKNOWN	AAANWWTGC_UNKNOWN		194	0.465907	1.69196	0.0142276	0.0229726	0.586	7727	tags=37%, list=14%, signal=42%
CEBPDELTA_Q6	CEBPDELTA_Q6		244	0.396477	1.69193	0.00208768	0.0228658	0.586	8040	tags=30%, list=15%, signal=35%
ZNF586_TARGET_GENES	ZNF586_TARGET_GENES		53	0.433051	1.6914	0.00209644	0.0228384	0.588	7586	tags=30%, list=14%, signal=35%
AREB6_01	AREB6_01		267	0.361045	1.69108	0	0.0228123	0.589	8609	tags=28%, list=16%, signal=34%
GATA1_05	GATA1_05		281	0.401199	1.69069	0.00598802	0.0227534	0.59	7658	tags=32%, list=14%, signal=37%
TERF1_TARGET_GENES	TERF1_TARGET_GENES		280	0.428204	1.69025	0.0229008	0.0227076	0.591	7497	tags=30%, list=14%, signal=35%
E2F_Q6_01	E2F_Q6_01		236	0.380801	1.68736	0.0123457	0.0230939	0.595	9609	tags=34%, list=17%, signal=41%
HOXA4_Q2	HOXA4_Q2		266	0.419727	1.6865	0.00214133	0.0231004	0.597	7727	tags=34%, list=14%, signal=39%
OCT1_03	OCT1_03		231	0.434949	1.68595	0.0127389	0.0230764	0.597	10284	tags=40%, list=19%, signal=49%
ZNF512B_TARGET_GENES	ZNF512B_TARGET_GENES		214	0.374656	1.68495	0	0.0231822	0.597	8305	tags=33%, list=15%, signal=38%
AR_02	AR_02		40	0.456968	1.68297	0.0126316	0.0234431	0.601	7106	tags=33%, list=13%, signal=37%
NFAT_Q4_01	NFAT_Q4_01		264	0.412787	1.68276	0.0104384	0.0233876	0.602	9091	tags=36%, list=16%, signal=43%
FOXO4_02	FOXO4_02		256	0.436409	1.68258	0.0124224	0.0233339	0.602	7623	tags=31%, list=14%, signal=36%
GTGGGTGK_UNKNOWN	GTGGGTGK_UNKNOWN		295	0.40994	1.68242	0.00420168	0.0232657	0.602	9414	tags=36%, list=17%, signal=43%
E2F_Q3	E2F_Q3		220	0.392447	1.68121	0.0126582	0.0233496	0.604	9667	tags=36%, list=18%, signal=44%
IPF1_Q4	IPF1_Q4		255	0.416231	1.68047	0.0060241	0.0233933	0.608	4367	tags=24%, list=8%, signal=26%
E2F_03	E2F_03		240	0.376476	1.67525	0.0144628	0.0243681	0.617	9609	tags=32%, list=17%, signal=39%
SMTTTTGT_UNKNOWN	SMTTTTGT_UNKNOWN		403	0.391905	1.67443	0.00816326	0.0244341	0.619	7795	tags=31%, list=14%, signal=36%
TITF1_Q3	TITF1_Q3		240	0.414181	1.67407	0.00612245	0.0243587	0.619	8522	tags=34%, list=15%, signal=40%
TTTNNANAGCYR_UNKNOWN	TTTNNANAGCYR_UNKNOWN		88	0.462843	1.67386	0.00819672	0.0243317	0.621	9091	tags=39%, list=16%, signal=46%
ZNF486_TARGET_GENES	ZNF486_TARGET_GENES		281	0.382186	1.67329	0	0.0243195	0.621	9886	tags=33%, list=18%, signal=41%
NFKB_Q6	NFKB_Q6		253	0.412052	1.67224	0.0106383	0.0244392	0.622	6857	tags=30%, list=12%, signal=35%
AP1_Q4	AP1_Q4		266	0.375792	1.67192	0.00631579	0.0244195	0.623	11509	tags=41%, list=21%, signal=51%
PTF1BETA_Q6	PTF1BETA_Q6		241	0.378431	1.67047	0.00817996	0.0245886	0.627	9655	tags=36%, list=17%, signal=44%
OCT1_06	OCT1_06		262	0.416938	1.67039	0.0060241	0.024499	0.627	7715	tags=32%, list=14%, signal=37%
RTTTNNNYTGGM_UNKNOWN	RTTTNNNYTGGM_UNKNOWN		153	0.45522	1.66735	0.00200803	0.0249797	0.632	9032	tags=36%, list=16%, signal=43%
SIX1_TARGET_GENES	SIX1_TARGET_GENES		359	0.350259	1.66594	0	0.0251944	0.635	10000	tags=33%, list=18%, signal=40%
ER_Q6	ER_Q6		278	0.358673	1.66562	0.0043573	0.0252034	0.636	9079	tags=35%, list=16%, signal=42%
PR_Q2	PR_Q2		260	0.395185	1.66546	0.00422833	0.0251126	0.636	8663	tags=33%, list=16%, signal=39%
AML1_01	AML1_01		264	0.407485	1.6642	0.0122699	0.0252286	0.638	10363	tags=38%, list=19%, signal=46%
AML1_Q6	AML1_Q6		264	0.407485	1.6642	0.0122699	0.0251185	0.638	10363	tags=38%, list=19%, signal=46%
HNF3B_01	HNF3B_01		222	0.432221	1.66408	0	0.0250609	0.638	7623	tags=31%, list=14%, signal=36%
TAAWWATAG_RSRFC4_Q2	TAAWWATAG_RSRFC4_Q2		167	0.430567	1.66332	0.00628931	0.0250795	0.639	9950	tags=36%, list=18%, signal=44%
WIZ_TARGET_GENES	WIZ_TARGET_GENES		19	0.54524	1.65888	0.018595	0.0260643	0.648	11994	tags=53%, list=22%, signal=67%
FOXO3_01	FOXO3_01		247	0.417763	1.65804	0.0123203	0.0261851	0.651	9892	tags=35%, list=18%, signal=42%
SP1_Q6	SP1_Q6		256	0.339177	1.65734	0.00443459	0.0262134	0.652	8633	tags=31%, list=16%, signal=37%
LXR_DR4_Q3	LXR_DR4_Q3		91	0.406924	1.65706	0.0107991	0.0261378	0.652	8395	tags=34%, list=15%, signal=40%
IRF1_Q6	IRF1_Q6		260	0.401862	1.65576	0.00608519	0.0263351	0.655	7874	tags=30%, list=14%, signal=34%
SP1_01	SP1_01		238	0.3553	1.65303	0.0125523	0.0269244	0.666	9167	tags=33%, list=17%, signal=39%
USF_Q6_01	USF_Q6_01		241	0.327847	1.65262	0.00863931	0.0269231	0.666	9055	tags=31%, list=16%, signal=37%
LEF1_Q2	LEF1_Q2		229	0.402015	1.65238	0.0139442	0.0269126	0.668	11445	tags=43%, list=21%, signal=54%
HFH1_01	HFH1_01		247	0.414465	1.65084	0.00610998	0.0271406	0.67	9886	tags=36%, list=18%, signal=44%
RBM15_TARGET_GENES	RBM15_TARGET_GENES		181	0.327571	1.65035	0	0.0271205	0.671	10370	tags=34%, list=19%, signal=41%
AP2ALPHA_01	AP2ALPHA_01		239	0.33648	1.64969	0.0063425	0.0271394	0.672	7733	tags=29%, list=14%, signal=33%
SRPK1_TARGET_GENES	SRPK1_TARGET_GENES		376	0.33328	1.64908	0.0188679	0.0271248	0.672	12138	tags=37%, list=22%, signal=47%
CREBP1_01	CREBP1_01		183	0.418981	1.64504	0.0167364	0.0280594	0.683	9038	tags=36%, list=16%, signal=43%
ZNF558_TARGET_GENES	ZNF558_TARGET_GENES		297	0.330946	1.64486	0	0.0280296	0.683	8601	tags=28%, list=16%, signal=33%
LMX1B_TARGET_GENES	LMX1B_TARGET_GENES		30	0.513222	1.64425	0.010142	0.0281271	0.683	3834	tags=27%, list=7%, signal=29%
NFY_Q6	NFY_Q6		254	0.345084	1.64368	0	0.0281258	0.683	9501	tags=33%, list=17%, signal=40%
HFH8_01	HFH8_01		205	0.420021	1.64215	0.00416667	0.0283697	0.692	9568	tags=39%, list=17%, signal=46%
CREB_02	CREB_02		255	0.325026	1.64021	0.00431965	0.0287246	0.699	10248	tags=35%, list=19%, signal=43%
CEBP_01	CEBP_01		274	0.412318	1.63912	0.00632911	0.028939	0.703	9052	tags=35%, list=16%, signal=42%
MEIS1AHOXA9_01	MEIS1AHOXA9_01		121	0.431323	1.63821	0.00838574	0.0290785	0.703	5864	tags=29%, list=11%, signal=32%
TTCYNRGAA_STAT5B_01	TTCYNRGAA_STAT5B_01		335	0.387105	1.63815	0.0103734	0.0289631	0.703	6939	tags=30%, list=13%, signal=34%
MYCMAX_03	MYCMAX_03		255	0.3227	1.6359	0.00833333	0.0293567	0.712	8613	tags=30%, list=16%, signal=35%
CREB_Q3	CREB_Q3		247	0.310359	1.6355	0.00845666	0.0293252	0.714	10980	tags=37%, list=20%, signal=46%
YY1_01	YY1_01		250	0.376913	1.63496	0.0168421	0.0293626	0.716	9053	tags=31%, list=16%, signal=37%
AP2GAMMA_01	AP2GAMMA_01		249	0.340879	1.63487	0.00636943	0.0292577	0.716	7733	tags=30%, list=14%, signal=34%
LHX3_TARGET_GENES	LHX3_TARGET_GENES		23	0.595012	1.63309	0.0180723	0.029695	0.719	6942	tags=35%, list=13%, signal=40%
MYB_Q5_01	MYB_Q5_01		267	0.378775	1.63288	0.0042735	0.0296411	0.72	10959	tags=38%, list=20%, signal=47%
PAX2_02	PAX2_02		263	0.401816	1.63224	0.0124481	0.0296528	0.721	9493	tags=37%, list=17%, signal=44%
AR_Q2	AR_Q2		126	0.398507	1.63213	0.00407332	0.0295965	0.722	9174	tags=37%, list=17%, signal=45%
AACWWCAANK_UNKNOWN	AACWWCAANK_UNKNOWN		144	0.375775	1.63095	0.00625	0.0297836	0.724	9304	tags=33%, list=17%, signal=39%
GATA6_01	GATA6_01		266	0.408239	1.63085	0.00413223	0.0297017	0.725	7941	tags=33%, list=14%, signal=39%
OCT1_07	OCT1_07		167	0.453441	1.62519	0.0186335	0.0310519	0.737	10435	tags=42%, list=19%, signal=52%
MYOGNF1_01	MYOGNF1_01		48	0.465668	1.62379	0.0105932	0.0312946	0.74	7213	tags=38%, list=13%, signal=43%
TTCNRGNNNNTTC_HSF_Q6	TTCNRGNNNNTTC_HSF_Q6		153	0.389339	1.6236	0.0218254	0.0312188	0.74	10193	tags=39%, list=18%, signal=47%
E2F1_Q3_01	E2F1_Q3_01		245	0.345844	1.62276	0.00854701	0.0312563	0.741	7708	tags=29%, list=14%, signal=34%
NFE2L1_TARGET_GENES	NFE2L1_TARGET_GENES		459	0.273012	1.62221	0.00198413	0.0312413	0.741	7749	tags=24%, list=14%, signal=27%
MYC_Q2	MYC_Q2		184	0.336239	1.62209	0.00608519	0.0311449	0.741	6932	tags=28%, list=13%, signal=32%
AMEF2_Q6	AMEF2_Q6		259	0.400125	1.62163	0.0125786	0.0311635	0.742	9871	tags=36%, list=18%, signal=44%
PRDM5_TARGET_GENES	PRDM5_TARGET_GENES		113	0.40598	1.62091	0.00213675	0.031176	0.744	8614	tags=35%, list=16%, signal=42%
CDX2_Q5	CDX2_Q5		254	0.42744	1.62064	0.01875	0.0311404	0.745	8320	tags=35%, list=15%, signal=41%
ZNF547_TARGET_GENES	ZNF547_TARGET_GENES		327	0.308504	1.62048	0	0.0310416	0.745	8195	tags=25%, list=15%, signal=29%
RFX7_TARGET_GENES	RFX7_TARGET_GENES		478	0.327253	1.61922	0.0258964	0.0311792	0.745	8468	tags=29%, list=15%, signal=34%
TCF11_01	TCF11_01		254	0.417593	1.61909	0.0188285	0.0310926	0.745	10635	tags=42%, list=19%, signal=52%
KTGGYRSGAA_UNKNOWN	KTGGYRSGAA_UNKNOWN		75	0.417873	1.61799	0.0244898	0.0312343	0.748	10142	tags=40%, list=18%, signal=49%
AAAYRNCTG_UNKNOWN	AAAYRNCTG_UNKNOWN		372	0.39587	1.61684	0.0123711	0.0315378	0.75	11226	tags=40%, list=20%, signal=49%
FOXC1_TARGET_GENES	FOXC1_TARGET_GENES		82	0.38155	1.61604	0.00852879	0.0316319	0.753	7385	tags=27%, list=13%, signal=31%
HIVEP1_TARGET_GENES	HIVEP1_TARGET_GENES		173	0.358985	1.61456	0.0139165	0.0318366	0.755	11754	tags=36%, list=21%, signal=45%
SP1_Q2_01	SP1_Q2_01		247	0.363243	1.61288	0.0196078	0.0321993	0.757	7638	tags=30%, list=14%, signal=35%
CDX1_TARGET_GENES	CDX1_TARGET_GENES		41	0.433856	1.61273	0.0247423	0.0321513	0.758	16286	tags=59%, list=30%, signal=83%
HSF1_01	HSF1_01		273	0.385772	1.61272	0.0105042	0.0320369	0.758	10322	tags=36%, list=19%, signal=44%
HFH3_01	HFH3_01		196	0.429962	1.60673	0.0248447	0.0335043	0.77	10914	tags=39%, list=20%, signal=49%
ERR1_Q2	ERR1_Q2		259	0.357944	1.60668	0.0107991	0.0333912	0.77	10789	tags=36%, list=20%, signal=45%
MZF1_02	MZF1_02		230	0.34679	1.60647	0.0171674	0.0333337	0.77	8186	tags=30%, list=15%, signal=35%
AC118549_1_TARGET_GENES	AC118549_1_TARGET_GENES		303	0.304297	1.606	0.0140845	0.0333651	0.77	10615	tags=30%, list=19%, signal=37%
TGGNNNNNNKCCAR_UNKNOWN	TGGNNNNNNKCCAR_UNKNOWN		425	0.3696	1.60583	0.00842105	0.0332808	0.77	9852	tags=35%, list=18%, signal=42%
NF1_Q6	NF1_Q6		263	0.367976	1.60485	0.0041841	0.0334126	0.771	8949	tags=34%, list=16%, signal=40%
STAT5A_04	STAT5A_04		213	0.407227	1.60426	0.0205339	0.0334749	0.772	6953	tags=31%, list=13%, signal=36%
DNMT1_TARGET_GENES	DNMT1_TARGET_GENES		219	0.337268	1.60294	0.00952381	0.0337638	0.775	9378	tags=35%, list=17%, signal=42%
ALPHACP1_01	ALPHACP1_01		257	0.317985	1.60227	0.00417537	0.033854	0.779	8652	tags=28%, list=16%, signal=34%
NKX25_01	NKX25_01		126	0.426481	1.60224	0.0103734	0.033751	0.779	7727	tags=30%, list=14%, signal=35%
FOXM1_01	FOXM1_01		243	0.382007	1.59982	0.0229167	0.0342955	0.781	8957	tags=33%, list=16%, signal=39%
E2F_Q2	E2F_Q2		177	0.39475	1.59844	0.062249	0.0344559	0.783	8321	tags=32%, list=15%, signal=37%
CREB3_TARGET_GENES	CREB3_TARGET_GENES		486	0.283418	1.59792	0	0.0344923	0.783	10209	tags=32%, list=18%, signal=39%
NR1I2_TARGET_GENES	NR1I2_TARGET_GENES		330	0.319022	1.59727	0.0287474	0.034627	0.785	8377	tags=29%, list=15%, signal=34%
AGCYRWTTC_UNKNOWN	AGCYRWTTC_UNKNOWN		120	0.403676	1.59703	0.0103093	0.0345856	0.786	5311	tags=26%, list=10%, signal=29%
HP1SITEFACTOR_Q6	HP1SITEFACTOR_Q6		230	0.387868	1.59646	0.00632911	0.0346447	0.788	8972	tags=37%, list=16%, signal=44%
AP1_Q2_01	AP1_Q2_01		268	0.366982	1.59638	0.00434783	0.0345579	0.788	8186	tags=33%, list=15%, signal=39%
SIRT3_TARGET_GENES	SIRT3_TARGET_GENES		56	0.40405	1.59582	0.0149573	0.0346543	0.788	6429	tags=34%, list=12%, signal=38%
CHAF1A_TARGET_GENES	CHAF1A_TARGET_GENES		94	0.410459	1.59392	0.0208768	0.0350949	0.792	10664	tags=46%, list=19%, signal=57%
USF_Q6	USF_Q6		258	0.302007	1.59319	0.00211864	0.0351922	0.793	8828	tags=31%, list=16%, signal=37%
TGATTTRY_GFI1_01	TGATTTRY_GFI1_01		293	0.419068	1.59199	0.00829876	0.035401	0.795	6795	tags=29%, list=12%, signal=33%
YY1_02	YY1_02		247	0.322567	1.59171	0.0403226	0.0353555	0.795	8912	tags=30%, list=16%, signal=36%
PIT1_Q6	PIT1_Q6		236	0.416287	1.59059	0.0164948	0.0355369	0.796	8295	tags=31%, list=15%, signal=36%
ETS1_B	ETS1_B		263	0.397216	1.58945	0.0294118	0.0357212	0.799	7894	tags=34%, list=14%, signal=40%
LEF1_Q6	LEF1_Q6		263	0.372477	1.58552	0.0145833	0.0366369	0.814	10488	tags=38%, list=19%, signal=47%
NGFIC_01	NGFIC_01		251	0.332669	1.58483	0.0146444	0.036712	0.815	10044	tags=35%, list=18%, signal=43%
EVI1_04	EVI1_04		235	0.407595	1.58417	0.0186722	0.0368113	0.817	8347	tags=30%, list=15%, signal=35%
PAX4_02	PAX4_02		239	0.403911	1.58413	0.0104822	0.0366985	0.817	7680	tags=33%, list=14%, signal=39%
SP3_Q3	SP3_Q3		242	0.329413	1.58194	0.00645161	0.0373576	0.822	7733	tags=28%, list=14%, signal=32%
ZNF618_TARGET_GENES	ZNF618_TARGET_GENES		488	0.305536	1.58055	0	0.0377275	0.824	7579	tags=26%, list=14%, signal=30%
IK3_01	IK3_01		226	0.36218	1.57969	0	0.0378314	0.824	8949	tags=36%, list=16%, signal=43%
YATTNATC_UNKNOWN	YATTNATC_UNKNOWN		378	0.381238	1.57856	0.00847458	0.0380848	0.826	9161	tags=33%, list=17%, signal=39%
GGAMTNNNNNTCCY_UNKNOWN	GGAMTNNNNNTCCY_UNKNOWN		116	0.340071	1.57686	0.00649351	0.0384133	0.826	7651	tags=29%, list=14%, signal=34%
EVI1_01	EVI1_01		16	0.567804	1.57686	0.0244898	0.0382914	0.826	7623	tags=44%, list=14%, signal=51%
VDR_Q6	VDR_Q6		272	0.33993	1.57641	0.0104822	0.0382802	0.826	6141	tags=25%, list=11%, signal=28%
STAT4_01	STAT4_01		264	0.404763	1.57452	0.0245399	0.0388107	0.83	8174	tags=33%, list=15%, signal=38%
PHF21A_TARGET_GENES	PHF21A_TARGET_GENES		273	0.30483	1.57318	0.00205339	0.0391461	0.834	7708	tags=28%, list=14%, signal=32%
ARHGAP35_TARGET_GENES	ARHGAP35_TARGET_GENES		110	0.331726	1.57249	0.0140845	0.0392964	0.837	7443	tags=28%, list=13%, signal=33%
SRPK2_TARGET_GENES	SRPK2_TARGET_GENES		77	0.395954	1.57234	0.00401606	0.039217	0.837	7418	tags=31%, list=13%, signal=36%
ER_Q6_02	ER_Q6_02		255	0.344187	1.5717	0.00647948	0.0392483	0.838	9186	tags=33%, list=17%, signal=39%
SIX4_TARGET_GENES	SIX4_TARGET_GENES		41	0.433169	1.5689	0.0224033	0.0399644	0.843	3229	tags=24%, list=6%, signal=26%
EN1_01	EN1_01		111	0.437502	1.56848	0.0231579	0.0399508	0.843	12050	tags=47%, list=22%, signal=60%
AP1_Q2	AP1_Q2		260	0.366913	1.56834	0.010846	0.0398753	0.843	8853	tags=33%, list=16%, signal=39%
TST1_01	TST1_01		259	0.389407	1.56816	0.0204499	0.0397858	0.843	8398	tags=31%, list=15%, signal=37%
MTF1_Q4	MTF1_Q4		251	0.33999	1.56793	0.00879121	0.0397362	0.844	7031	tags=28%, list=13%, signal=32%
YTCCCRNNAGGY_UNKNOWN	YTCCCRNNAGGY_UNKNOWN		71	0.354898	1.5662	0.00409836	0.0400325	0.847	10626	tags=41%, list=19%, signal=51%
MYB_Q3	MYB_Q3		251	0.351401	1.56587	0.0146138	0.0400353	0.848	10877	tags=37%, list=20%, signal=45%
ZNF165_TARGET_GENES	ZNF165_TARGET_GENES		77	0.323927	1.56431	0.00203666	0.0404674	0.853	8679	tags=36%, list=16%, signal=43%
AR_Q6	AR_Q6		254	0.351374	1.56422	0.0124481	0.0403916	0.853	8395	tags=30%, list=15%, signal=36%
ZNF331_TARGET_GENES	ZNF331_TARGET_GENES		354	0.329577	1.56402	0.00840336	0.0403305	0.853	8043	tags=29%, list=15%, signal=33%
NRF2_Q4	NRF2_Q4		254	0.342985	1.56394	0.0172786	0.0402465	0.853	9892	tags=34%, list=18%, signal=42%
RREB1_01	RREB1_01		207	0.364704	1.56231	0.023913	0.0406214	0.856	8406	tags=31%, list=15%, signal=37%
ZNF532_TARGET_GENES	ZNF532_TARGET_GENES		62	0.351821	1.56228	0.031746	0.0405106	0.856	8738	tags=27%, list=16%, signal=33%
OVOL3_TARGET_GENES	OVOL3_TARGET_GENES		482	0.307577	1.55982	0.0299145	0.0411237	0.858	7194	tags=26%, list=13%, signal=30%
DR4_Q2	DR4_Q2		262	0.340213	1.55846	0.00636943	0.0413913	0.86	10258	tags=37%, list=19%, signal=45%
AREB6_02	AREB6_02		255	0.346847	1.55793	0.00424628	0.041418	0.861	8298	tags=27%, list=15%, signal=31%
ATF4_Q2	ATF4_Q2		255	0.333951	1.55705	0.0174673	0.0416028	0.864	7874	tags=30%, list=14%, signal=35%
PPARA_TARGET_GENES	PPARA_TARGET_GENES		63	0.368731	1.55654	0.040568	0.0416808	0.864	8159	tags=32%, list=15%, signal=37%
CCCNNNNNNAAGWT_UNKNOWN	CCCNNNNNNAAGWT_UNKNOWN		101	0.342196	1.55442	0.0101626	0.0422974	0.87	6973	tags=27%, list=13%, signal=31%
TASOR_TARGET_GENES	TASOR_TARGET_GENES		252	0.306696	1.55414	0.0383838	0.0422705	0.87	9326	tags=31%, list=17%, signal=37%
GNCF_01	GNCF_01		78	0.409427	1.55203	0.012848	0.0428467	0.871	13830	tags=49%, list=25%, signal=65%
YTTCCNNNGGAMR_UNKNOWN	YTTCCNNNGGAMR_UNKNOWN		52	0.409444	1.55055	0.0340426	0.0432271	0.872	6756	tags=31%, list=12%, signal=35%
SP1_Q4_01	SP1_Q4_01		254	0.323252	1.54958	0.0174673	0.0434623	0.874	8100	tags=29%, list=15%, signal=34%
TAXCREB_01	TAXCREB_01		137	0.380285	1.54626	0.0404255	0.0446314	0.88	8413	tags=34%, list=15%, signal=40%
PAX2_01	PAX2_01		56	0.407495	1.54585	0.0184049	0.0446225	0.88	12641	tags=46%, list=23%, signal=60%
GATA1_03	GATA1_03		244	0.375787	1.54038	0.0228216	0.0463789	0.887	8372	tags=33%, list=15%, signal=39%
MEF2_Q6_01	MEF2_Q6_01		244	0.399707	1.53918	0.0297872	0.0466094	0.888	9950	tags=36%, list=18%, signal=43%
ZNF133_TARGET_GENES	ZNF133_TARGET_GENES		222	0.315975	1.53488	0.00803213	0.0480535	0.892	10993	tags=34%, list=20%, signal=42%
OCT1_05	OCT1_05		251	0.386843	1.53468	0.0164271	0.0479983	0.892	7302	tags=29%, list=13%, signal=33%
NKX2_8_TARGET_GENES	NKX2_8_TARGET_GENES		36	0.418799	1.5331	0.044316	0.0484276	0.894	5928	tags=31%, list=11%, signal=34%
RLF_TARGET_GENES	RLF_TARGET_GENES		329	0.303254	1.53259	0.0189076	0.0484471	0.894	7845	tags=27%, list=14%, signal=31%
EVI1_05	EVI1_05		172	0.38326	1.53225	0.0265306	0.0484409	0.894	7871	tags=30%, list=14%, signal=34%
FOXJ2_01	FOXJ2_01		186	0.388035	1.53191	0.0260521	0.0484218	0.894	9378	tags=30%, list=17%, signal=36%
ZNF490_TARGET_GENES	ZNF490_TARGET_GENES		458	0.294755	1.53013	0	0.0489154	0.896	8751	tags=27%, list=16%, signal=32%
PR_01	PR_01		148	0.39936	1.52949	0.0165631	0.0490267	0.9	9034	tags=36%, list=16%, signal=44%
ZF5_B	ZF5_B		239	0.328361	1.52828	0.0144628	0.0493009	0.9	6289	tags=23%, list=11%, signal=26%
AP1_Q4_01	AP1_Q4_01		257	0.351506	1.52813	0.012766	0.0492236	0.9	11298	tags=38%, list=20%, signal=47%
TBX1_TARGET_GENES	TBX1_TARGET_GENES		227	0.33037	1.52782	0.012959	0.0491318	0.9	11612	tags=35%, list=21%, signal=44%
IRF9_TARGET_GENES	IRF9_TARGET_GENES		393	0.283812	1.52748	0.00646552	0.0491382	0.9	9488	tags=30%, list=17%, signal=36%
PCGF6_TARGET_GENES	PCGF6_TARGET_GENES		73	0.399114	1.52682	0.0597938	0.0492005	0.901	6783	tags=33%, list=12%, signal=37%
NCX_01	NCX_01		173	0.390686	1.52584	0.04	0.0494528	0.901	5501	tags=27%, list=10%, signal=29%
HTF_01	HTF_01		71	0.418349	1.52496	0.0528541	0.0496419	0.903	7790	tags=30%, list=14%, signal=34%
PAX6_01	PAX6_01		99	0.405442	1.52289	0.038	0.050304	0.906	8937	tags=36%, list=16%, signal=43%
AHR_Q5	AHR_Q5		218	0.347434	1.52246	0.0313808	0.0503344	0.906	6998	tags=29%, list=13%, signal=33%
NKX25_02	NKX25_02		260	0.393327	1.52149	0.0291667	0.0505252	0.907	11471	tags=43%, list=21%, signal=54%
HMGIY_Q6	HMGIY_Q6		248	0.348259	1.52081	0.0141988	0.0506477	0.908	10322	tags=37%, list=19%, signal=45%
ZNF101_TARGET_GENES	ZNF101_TARGET_GENES		459	0.288448	1.5202	0.028866	0.0507184	0.908	7043	tags=25%, list=13%, signal=28%
HSF2_01	HSF2_01		255	0.349552	1.51815	0.022449	0.0513575	0.911	9167	tags=31%, list=17%, signal=37%
HNF1_Q6	HNF1_Q6		254	0.384465	1.51796	0.032	0.0512907	0.911	8982	tags=33%, list=16%, signal=39%
ZIC1_01	ZIC1_01		259	0.344432	1.51788	0.0274262	0.0511651	0.911	8391	tags=30%, list=15%, signal=35%
NKX22_01	NKX22_01		192	0.388079	1.51786	0.0349794	0.0510346	0.911	7757	tags=30%, list=14%, signal=34%
SMAD4_Q6	SMAD4_Q6		241	0.349133	1.51725	0.0191489	0.0511342	0.911	9167	tags=34%, list=17%, signal=40%
NRF1_Q6	NRF1_Q6		258	0.318439	1.51636	0.0463158	0.0513363	0.912	9519	tags=32%, list=17%, signal=38%
NKX3A_01	NKX3A_01		232	0.389553	1.51632	0.0254237	0.0512174	0.912	9261	tags=34%, list=17%, signal=41%
ZA_Q9UM89_TARGET_GENES	ZA_Q9UM89_TARGET_GENES		66	0.363576	1.51385	0.0373444	0.0521434	0.917	7031	tags=32%, list=13%, signal=36%
MSX1_01	MSX1_01		172	0.378962	1.51329	0.029724	0.0522401	0.918	8196	tags=29%, list=15%, signal=34%
HNF1_01	HNF1_01		244	0.389949	1.51148	0.0416667	0.0527778	0.92	9723	tags=36%, list=18%, signal=44%
OSF2_Q6	OSF2_Q6		264	0.365119	1.51129	0.0289256	0.0526842	0.92	9167	tags=36%, list=17%, signal=42%
MAZ_Q6	MAZ_Q6		190	0.328649	1.51051	0.0439122	0.0528464	0.922	6541	tags=26%, list=12%, signal=29%
HNF3_Q6	HNF3_Q6		190	0.40575	1.50876	0.0242915	0.0533587	0.923	10381	tags=35%, list=19%, signal=43%
SIPA1_TARGET_GENES	SIPA1_TARGET_GENES		136	0.327236	1.50683	0.0163599	0.0540151	0.927	9488	tags=32%, list=17%, signal=39%
LMNB2_TARGET_GENES	LMNB2_TARGET_GENES		33	0.43603	1.50679	0.0477178	0.0538796	0.927	5314	tags=27%, list=10%, signal=30%
ELF1_Q6	ELF1_Q6		245	0.398694	1.50582	0.0900196	0.0541951	0.928	8657	tags=36%, list=16%, signal=42%
OCT1_04	OCT1_04		238	0.401126	1.5052	0.0371901	0.0543158	0.928	9680	tags=33%, list=18%, signal=40%
CREL_01	CREL_01		255	0.36016	1.50505	0.0390144	0.054218	0.928	6318	tags=28%, list=11%, signal=31%
SYATTGTG_UNKNOWN	SYATTGTG_UNKNOWN		224	0.350897	1.50345	0.034188	0.0547637	0.932	8298	tags=31%, list=15%, signal=37%
ZNF581_TARGET_GENES	ZNF581_TARGET_GENES		309	0.313337	1.50296	0.0546875	0.0548129	0.932	10673	tags=33%, list=19%, signal=41%
EGR2_01	EGR2_01		196	0.339612	1.50242	0.0201794	0.0548824	0.933	7856	tags=28%, list=14%, signal=33%
ZNF85_TARGET_GENES	ZNF85_TARGET_GENES		309	0.311324	1.50214	0.0245902	0.0548358	0.933	8349	tags=26%, list=15%, signal=30%
NCOA2_TARGET_GENES	NCOA2_TARGET_GENES		499	0.273134	1.50161	0.00414079	0.0549155	0.933	8561	tags=24%, list=16%, signal=28%
CDP_01	CDP_01		93	0.402244	1.50124	0.0254777	0.0548748	0.933	8100	tags=33%, list=15%, signal=39%
ZNF33A_TARGET_GENES	ZNF33A_TARGET_GENES		236	0.305051	1.50111	0.00225734	0.0547716	0.933	10666	tags=33%, list=19%, signal=41%
AP2_Q6	AP2_Q6		253	0.314077	1.50093	0.0188679	0.0546823	0.933	7594	tags=28%, list=14%, signal=32%
SUPT16H_TARGET_GENES	SUPT16H_TARGET_GENES		206	0.355773	1.4989	0.067086	0.0553456	0.934	7950	tags=28%, list=14%, signal=32%
METTL14_TARGET_GENES	METTL14_TARGET_GENES		151	0.353241	1.49839	0.0146138	0.0554086	0.934	6998	tags=26%, list=13%, signal=30%
CACBINDINGPROTEIN_Q6	CACBINDINGPROTEIN_Q6		243	0.323583	1.49815	0.0292887	0.0553417	0.935	8949	tags=30%, list=16%, signal=36%
IRF7_01	IRF7_01		254	0.359014	1.49753	0.03125	0.0554612	0.936	9540	tags=34%, list=17%, signal=41%
YTAAYNGCT_UNKNOWN	YTAAYNGCT_UNKNOWN		150	0.383939	1.49556	0.0336634	0.0561916	0.939	9401	tags=35%, list=17%, signal=42%
SMARCA1_TARGET_GENES	SMARCA1_TARGET_GENES		126	0.311586	1.49509	0.012474	0.0562636	0.939	11027	tags=37%, list=20%, signal=46%
HNF1_C	HNF1_C		246	0.372417	1.49494	0.0163934	0.0561697	0.939	9892	tags=35%, list=18%, signal=42%
MEF2_01	MEF2_01		145	0.406192	1.49368	0.0391753	0.0565602	0.941	6752	tags=30%, list=12%, signal=34%
CIC_TARGET_GENES	CIC_TARGET_GENES		466	0.305171	1.49305	0.0433071	0.0566824	0.941	10663	tags=32%, list=19%, signal=40%
LHX3_01	LHX3_01		226	0.404307	1.49067	0.0344828	0.0574542	0.944	8937	tags=35%, list=16%, signal=41%
MEIS1BHOXA9_01	MEIS1BHOXA9_01		143	0.364373	1.49058	0.0208768	0.0573498	0.945	7715	tags=29%, list=14%, signal=33%
TATA_C	TATA_C		280	0.369629	1.48849	0.0246407	0.0581243	0.947	7748	tags=28%, list=14%, signal=33%
NFKAPPAB65_01	NFKAPPAB65_01		239	0.356812	1.4882	0.0530612	0.058093	0.947	6318	tags=26%, list=11%, signal=30%
MLXIP_TARGET_GENES	MLXIP_TARGET_GENES		194	0.303664	1.48766	0.0331263	0.058189	0.947	8050	tags=24%, list=15%, signal=28%
HOXB8_TARGET_GENES	HOXB8_TARGET_GENES		70	0.339772	1.4875	0.0555556	0.0581132	0.947	7172	tags=26%, list=13%, signal=30%
TCF11MAFG_01	TCF11MAFG_01		199	0.369565	1.48726	0.0596708	0.0580612	0.947	10226	tags=39%, list=19%, signal=47%
SRY_01	SRY_01		222	0.367223	1.48367	0.055336	0.059405	0.951	11445	tags=39%, list=21%, signal=49%
CREBP1CJUN_01	CREBP1CJUN_01		258	0.319952	1.48254	0.034188	0.0597361	0.952	10308	tags=35%, list=19%, signal=43%
AP1_C	AP1_C		270	0.33849	1.48241	0.0211864	0.0596507	0.952	8759	tags=30%, list=16%, signal=35%
PEA3_Q6	PEA3_Q6		260	0.403574	1.48213	0.09375	0.0595781	0.952	7125	tags=29%, list=13%, signal=33%
ACAWNRNSRCGG_UNKNOWN	ACAWNRNSRCGG_UNKNOWN		64	0.337752	1.4815	0.0871369	0.0596904	0.952	7944	tags=30%, list=14%, signal=35%
ZNF34_TARGET_GENES	ZNF34_TARGET_GENES		312	0.299754	1.48122	0	0.0596596	0.952	4898	tags=18%, list=9%, signal=20%
CDPCR1_01	CDPCR1_01		129	0.374389	1.47981	0.0167364	0.060075	0.952	7793	tags=32%, list=14%, signal=37%
SRSF7_TARGET_GENES	SRSF7_TARGET_GENES		116	0.309901	1.47974	0.0320513	0.0599658	0.952	8257	tags=29%, list=15%, signal=34%
MYBL1_TARGET_GENES	MYBL1_TARGET_GENES		254	0.293239	1.47973	0.0561122	0.0598252	0.952	7513	tags=23%, list=14%, signal=26%
AP1_Q6	AP1_Q6		256	0.327109	1.47921	0.0234542	0.0599171	0.952	11509	tags=39%, list=21%, signal=49%
RAAGNYNNCTTY_UNKNOWN	RAAGNYNNCTTY_UNKNOWN		143	0.397885	1.4792	0.0539419	0.0597773	0.952	4987	tags=27%, list=9%, signal=29%
MYAATNNNNNNNGGC_UNKNOWN	MYAATNNNNNNNGGC_UNKNOWN		111	0.344672	1.47896	0.0259179	0.0597152	0.952	11579	tags=41%, list=21%, signal=52%
MEF2_03	MEF2_03		234	0.388638	1.47876	0.0321888	0.0596781	0.952	8295	tags=32%, list=15%, signal=37%
PAX8_01	PAX8_01		37	0.460397	1.47475	0.0804829	0.0612243	0.956	8937	tags=43%, list=16%, signal=52%
SETBP1_TARGET_GENES	SETBP1_TARGET_GENES		188	0.313383	1.47097	0.0863454	0.062974	0.958	9085	tags=31%, list=16%, signal=37%
SYNCRIP_TARGET_GENES	SYNCRIP_TARGET_GENES		21	0.467012	1.47033	0.0428571	0.06313	0.958	4248	tags=33%, list=8%, signal=36%
NFKB_C	NFKB_C		266	0.338895	1.46894	0.0308642	0.0635991	0.958	7419	tags=26%, list=13%, signal=30%
PAX4_01	PAX4_01		265	0.294043	1.46816	0.0268595	0.0638494	0.958	9227	tags=31%, list=17%, signal=37%
ZNF37A_TARGET_GENES	ZNF37A_TARGET_GENES		150	0.318707	1.46746	0.0205761	0.0640235	0.958	7739	tags=28%, list=14%, signal=32%
EVI1_03	EVI1_03		58	0.420018	1.46728	0.0433884	0.0639462	0.959	9788	tags=38%, list=18%, signal=46%
CDP_02	CDP_02		110	0.39943	1.46635	0.0491803	0.0641983	0.96	8402	tags=34%, list=15%, signal=40%
TAL1ALPHAE47_01	TAL1ALPHAE47_01		254	0.374781	1.46469	0.0400844	0.0648293	0.961	7117	tags=29%, list=13%, signal=33%
NFY_C	NFY_C		239	0.291884	1.46399	0.0204918	0.0649764	0.961	9779	tags=28%, list=18%, signal=34%
CREB_01	CREB_01		262	0.309854	1.46213	0.0367965	0.0657809	0.961	10308	tags=34%, list=19%, signal=42%
RNTCANNRNNYNATTW_UNKNOWN	RNTCANNRNNYNATTW_UNKNOWN		63	0.452613	1.46096	0.0703934	0.0660699	0.961	9488	tags=40%, list=17%, signal=48%
OCT1_01	OCT1_01		259	0.374389	1.4607	0.0444915	0.0660093	0.961	7399	tags=29%, list=13%, signal=34%
NCOA6_TARGET_GENES	NCOA6_TARGET_GENES		337	0.286447	1.45971	0.0121212	0.0662555	0.961	8133	tags=29%, list=15%, signal=34%
COUP_01	COUP_01		262	0.297277	1.45924	0.01222	0.0663239	0.961	4806	tags=19%, list=9%, signal=21%
UBE2I_TARGET_GENES	UBE2I_TARGET_GENES		85	0.325402	1.45866	0.0334728	0.0664834	0.961	10038	tags=32%, list=18%, signal=39%
TTANWNANTGGM_UNKNOWN	TTANWNANTGGM_UNKNOWN		65	0.417387	1.45861	0.0617284	0.0663455	0.961	11325	tags=40%, list=21%, signal=50%
AP1FJ_Q2	AP1FJ_Q2		266	0.322396	1.45816	0.027957	0.0663956	0.961	11509	tags=38%, list=21%, signal=48%
PAX_Q6	PAX_Q6		259	0.343503	1.45785	0.0383838	0.0663456	0.961	6651	tags=26%, list=12%, signal=30%
CP2_02	CP2_02		248	0.30706	1.45676	0.0191083	0.0666861	0.962	6780	tags=24%, list=12%, signal=27%
TEL2_Q6	TEL2_Q6		236	0.30841	1.4544	0.0658683	0.0677202	0.963	7117	tags=24%, list=13%, signal=27%
CDPCR3_01	CDPCR3_01		57	0.405959	1.45438	0.0164609	0.0675714	0.963	4230	tags=23%, list=8%, signal=25%
ZNF512_TARGET_GENES	ZNF512_TARGET_GENES		424	0.280443	1.45383	0.00211416	0.0676319	0.964	9283	tags=28%, list=17%, signal=34%
ZIC2_01	ZIC2_01		246	0.323871	1.45339	0.0452586	0.0676518	0.964	8372	tags=31%, list=15%, signal=36%
YGCANTGCR_UNKNOWN	YGCANTGCR_UNKNOWN		124	0.409816	1.45276	0.100418	0.0678038	0.964	9681	tags=39%, list=18%, signal=47%
CART1_01	CART1_01		225	0.388528	1.45091	0.0484211	0.0686282	0.965	8957	tags=32%, list=16%, signal=38%
HOXA7_TARGET_GENES	HOXA7_TARGET_GENES		109	0.286353	1.44919	0.0493827	0.0692667	0.965	11442	tags=32%, list=21%, signal=40%
TFIII_Q6	TFIII_Q6		203	0.31809	1.44835	0.0405117	0.0694448	0.965	6347	tags=26%, list=12%, signal=29%
DOT1L_TARGET_GENES	DOT1L_TARGET_GENES		304	0.288759	1.44615	0.0474227	0.0703615	0.967	7680	tags=26%, list=14%, signal=30%
MYCMAX_B	MYCMAX_B		268	0.278875	1.44591	0.0319149	0.0703194	0.967	9199	tags=26%, list=17%, signal=32%
NFKAPPAB_01	NFKAPPAB_01		251	0.351165	1.44383	0.0576132	0.0711588	0.967	8133	tags=30%, list=15%, signal=35%
P300_01	P300_01		252	0.301918	1.44382	0.0378947	0.0710164	0.967	10635	tags=31%, list=19%, signal=39%
NFXL1_TARGET_GENES	NFXL1_TARGET_GENES		425	0.285218	1.44321	0.0101833	0.0711551	0.967	7793	tags=26%, list=14%, signal=30%
ZNF41_TARGET_GENES	ZNF41_TARGET_GENES		226	0.30946	1.44291	0.0205339	0.0711422	0.967	7671	tags=24%, list=14%, signal=28%
ACAWYAAAG_UNKNOWN	ACAWYAAAG_UNKNOWN		106	0.36289	1.44172	0.0352697	0.0716056	0.968	10284	tags=39%, list=19%, signal=47%
MZF1_01	MZF1_01		233	0.330769	1.43939	0.0530786	0.0725058	0.969	7544	tags=28%, list=14%, signal=33%
PAX4_03	PAX4_03		252	0.332832	1.43871	0.0536481	0.0726851	0.969	9559	tags=32%, list=17%, signal=38%
SP1_Q6_01	SP1_Q6_01		241	0.293486	1.43794	0.0340136	0.0729303	0.969	8983	tags=27%, list=16%, signal=33%
ACTAYRNNNCCCR_UNKNOWN	ACTAYRNNNCCCR_UNKNOWN		452	0.285917	1.43786	0.0588235	0.0728242	0.969	9828	tags=32%, list=18%, signal=38%
GATA4_Q3	GATA4_Q3		251	0.36074	1.43659	0.0541126	0.0732671	0.969	7744	tags=29%, list=14%, signal=34%
STAT5A_02	STAT5A_02		136	0.360324	1.43534	0.041841	0.0736738	0.97	9749	tags=36%, list=18%, signal=44%
MYB_Q6	MYB_Q6		255	0.322933	1.43531	0.0377359	0.0735301	0.97	10567	tags=36%, list=19%, signal=45%
HOXC11_TARGET_GENES	HOXC11_TARGET_GENES		64	0.341073	1.43411	0.0531697	0.0739697	0.97	8204	tags=28%, list=15%, signal=33%
EGR3_01	EGR3_01		82	0.339429	1.43403	0.0493827	0.0738583	0.97	7040	tags=27%, list=13%, signal=31%
ZNF223_TARGET_GENES	ZNF223_TARGET_GENES		311	0.278274	1.43372	0.0131004	0.0738099	0.97	5978	tags=23%, list=11%, signal=25%
ZNF585B_TARGET_GENES	ZNF585B_TARGET_GENES		125	0.326737	1.43275	0.0484848	0.0740845	0.97	7586	tags=26%, list=14%, signal=31%
TFIIA_Q6	TFIIA_Q6		250	0.333474	1.4313	0.0508475	0.0746302	0.97	7744	tags=27%, list=14%, signal=31%
AP1_01	AP1_01		265	0.319329	1.43066	0.0301724	0.0747893	0.971	11697	tags=36%, list=21%, signal=45%
AACYNNNNTTCCS_UNKNOWN	AACYNNNNTTCCS_UNKNOWN		98	0.299955	1.43032	0.055914	0.0748038	0.971	11978	tags=39%, list=22%, signal=49%
NFKB_Q6_01	NFKB_Q6_01		234	0.348582	1.43006	0.057732	0.0747676	0.971	8133	tags=30%, list=15%, signal=35%
AP1_Q6_01	AP1_Q6_01		265	0.323208	1.42968	0.0552017	0.0747664	0.971	8653	tags=32%, list=16%, signal=38%
RBL1_TARGET_GENES	RBL1_TARGET_GENES		48	0.384243	1.42557	0.0793319	0.0764682	0.972	7473	tags=33%, list=14%, signal=39%
GCGNNANTTCC_UNKNOWN	GCGNNANTTCC_UNKNOWN		123	0.269759	1.42413	0.0636183	0.0768671	0.973	10831	tags=32%, list=20%, signal=39%
AP2REP_01	AP2REP_01		180	0.336589	1.42384	0.0615711	0.0768709	0.973	10951	tags=34%, list=20%, signal=43%
ZID_01	ZID_01		258	0.322624	1.42381	0.0506608	0.0767172	0.973	8972	tags=31%, list=16%, signal=37%
E4F1_Q6	E4F1_Q6		285	0.317541	1.42372	0.0857741	0.0766042	0.973	9920	tags=33%, list=18%, signal=40%
AR_01	AR_01		158	0.328669	1.42341	0.0270833	0.0766046	0.973	9957	tags=34%, list=18%, signal=42%
CTAWWWATA_RSRFC4_Q2	CTAWWWATA_RSRFC4_Q2		356	0.346073	1.42274	0.0559006	0.0768419	0.974	7281	tags=25%, list=13%, signal=29%
NMYC_01	NMYC_01		274	0.29218	1.42256	0.0311203	0.0767555	0.974	7844	tags=27%, list=14%, signal=31%
MTHFD1_TARGET_GENES	MTHFD1_TARGET_GENES		20	0.437445	1.42181	0.104082	0.0769343	0.974	10562	tags=55%, list=19%, signal=68%
GGGNNTTTCC_NFKB_Q6_01	GGGNNTTTCC_NFKB_Q6_01		130	0.414475	1.42073	0.106426	0.0772325	0.974	7385	tags=38%, list=13%, signal=43%
HNF4_01	HNF4_01		267	0.301945	1.41953	0.030888	0.0776516	0.974	8147	tags=26%, list=15%, signal=31%
YRCCAKNNGNCGC_UNKNOWN	YRCCAKNNGNCGC_UNKNOWN		66	0.358162	1.41862	0.0498008	0.0780402	0.976	4855	tags=24%, list=9%, signal=27%
GATA_C	GATA_C		262	0.339805	1.41832	0.0408998	0.0780204	0.976	9871	tags=34%, list=18%, signal=41%
YWATTWNNRGCT_UNKNOWN	YWATTWNNRGCT_UNKNOWN		71	0.430392	1.41521	0.101911	0.0794335	0.979	8937	tags=38%, list=16%, signal=45%
ZNF418_TARGET_GENES	ZNF418_TARGET_GENES		38	0.42898	1.41371	0.0571992	0.0799829	0.98	10643	tags=39%, list=19%, signal=49%
HAND1E47_01	HAND1E47_01		279	0.34361	1.41357	0.0589474	0.0798698	0.98	8174	tags=30%, list=15%, signal=36%
TAZ_TARGET_GENES	TAZ_TARGET_GENES		307	0.305091	1.41177	0.0357143	0.0805872	0.98	7029	tags=24%, list=13%, signal=28%
OCT1_Q6	OCT1_Q6		261	0.360841	1.41174	0.0602151	0.080446	0.98	7503	tags=27%, list=14%, signal=31%
MCAATNNNNNGCG_UNKNOWN	MCAATNNNNNGCG_UNKNOWN		84	0.310835	1.4092	0.0545073	0.0815586	0.983	11226	tags=32%, list=20%, signal=40%
GCM_Q2	GCM_Q2		237	0.335015	1.40878	0.0534188	0.0816061	0.983	6795	tags=28%, list=12%, signal=32%
RSRFC4_Q2	RSRFC4_Q2		216	0.373014	1.40633	0.0751566	0.0826813	0.985	7281	tags=29%, list=13%, signal=33%
USF_C	USF_C		282	0.27518	1.40562	0.0323232	0.0828418	0.985	6857	tags=23%, list=12%, signal=27%
CREB_Q4	CREB_Q4		265	0.291136	1.40549	0.0554371	0.0827238	0.985	9720	tags=31%, list=18%, signal=37%
WCAANNNYCAG_UNKNOWN	WCAANNNYCAG_UNKNOWN		251	0.283651	1.40411	0.0321932	0.0832514	0.985	9888	tags=32%, list=18%, signal=39%
ERCC8_TARGET_GENES	ERCC8_TARGET_GENES		16	0.482537	1.40339	0.0769231	0.0834807	0.985	1420	tags=25%, list=3%, signal=26%
GATA1_02	GATA1_02		245	0.338255	1.40134	0.0511247	0.0844021	0.986	8341	tags=29%, list=15%, signal=34%
HOXD1_TARGET_GENES	HOXD1_TARGET_GENES		72	0.344591	1.39998	0.0473251	0.084966	0.986	5427	tags=25%, list=10%, signal=28%
ETS2_B	ETS2_B		279	0.359493	1.39853	0.104418	0.0855293	0.986	7911	tags=31%, list=14%, signal=36%
SPZ1_01	SPZ1_01		231	0.291155	1.39578	0.0786749	0.0868484	0.988	10141	tags=30%, list=18%, signal=37%
EBNA1BP2_TARGET_GENES	EBNA1BP2_TARGET_GENES		361	0.267797	1.39558	0.0138614	0.086806	0.988	10469	tags=34%, list=19%, signal=41%
PAX8_B	PAX8_B		101	0.364914	1.39466	0.0738397	0.08721	0.988	6180	tags=27%, list=11%, signal=30%
ZBED4_TARGET_GENES	ZBED4_TARGET_GENES		289	0.302683	1.39463	0.112903	0.0870632	0.988	9570	tags=31%, list=17%, signal=37%
PAX3_B	PAX3_B		90	0.351325	1.39338	0.0804829	0.0874994	0.989	10390	tags=37%, list=19%, signal=45%
POU3F2_01	POU3F2_01		102	0.373263	1.39256	0.0757895	0.087758	0.989	3299	tags=21%, list=6%, signal=22%
CTNNB1_TARGET_GENES	CTNNB1_TARGET_GENES		402	0.265666	1.39246	0.0307377	0.0876331	0.989	8437	tags=26%, list=15%, signal=30%
ACCTGTTG_UNKNOWN	ACCTGTTG_UNKNOWN		153	0.344344	1.38251	0.103004	0.0929714	0.991	11423	tags=38%, list=21%, signal=48%
SMAD3_Q6	SMAD3_Q6		237	0.331036	1.37939	0.0448718	0.0946416	0.991	7645	tags=28%, list=14%, signal=33%
CREB_Q4_01	CREB_Q4_01		213	0.296783	1.37745	0.0720524	0.0955425	0.991	10308	tags=34%, list=19%, signal=41%
TGASTMAGC_NFE2_01	TGASTMAGC_NFE2_01		191	0.303938	1.37676	0.0441501	0.095733	0.991	11301	tags=36%, list=20%, signal=45%
ZSCAN18_TARGET_GENES	ZSCAN18_TARGET_GENES		47	0.33258	1.37631	0.10998	0.0958344	0.991	8522	tags=28%, list=15%, signal=33%
GATA3_01	GATA3_01		243	0.317829	1.37506	0.0504202	0.096356	0.991	8298	tags=31%, list=15%, signal=36%
TGANNYRGCA_TCF11MAFG_01	TGANNYRGCA_TCF11MAFG_01		301	0.302842	1.37467	0.0922432	0.0964003	0.991	9845	tags=31%, list=18%, signal=37%
AREB6_03	AREB6_03		260	0.296207	1.37126	0.0248963	0.0981137	0.991	4719	tags=20%, list=9%, signal=22%
FOXO4_TARGET_GENES	FOXO4_TARGET_GENES		361	0.279617	1.36775	0.12024	0.10003	0.991	8319	tags=24%, list=15%, signal=29%
HOX13_01	HOX13_01		45	0.401658	1.36762	0.0946237	0.0999343	0.991	8957	tags=40%, list=16%, signal=48%
ATF6_01	ATF6_01		125	0.338414	1.36762	0.126556	0.0997445	0.991	9666	tags=32%, list=18%, signal=39%
ZIC3_01	ZIC3_01		255	0.329541	1.36649	0.0905263	0.100159	0.991	8372	tags=29%, list=15%, signal=34%
S8_01	S8_01		244	0.37022	1.36335	0.10515	0.101676	0.991	12213	tags=40%, list=22%, signal=51%
NKX61_01	NKX61_01		233	0.359799	1.36256	0.0795918	0.101967	0.991	7945	tags=30%, list=14%, signal=35%
TMTCGCGANR_UNKNOWN	TMTCGCGANR_UNKNOWN		161	0.295548	1.36242	0.146341	0.101852	0.991	7886	tags=25%, list=14%, signal=30%
ZNF708_TARGET_GENES	ZNF708_TARGET_GENES		104	0.325908	1.36221	0.0714286	0.101794	0.991	6290	tags=23%, list=11%, signal=26%
TET1_SPLICE_VARIANT_VP_DE456_TARGET_GENES	TET1_SPLICE_VARIANT_VP_DE456_TARGET_GENES		363	0.260476	1.36206	0.016632	0.101667	0.991	5963	tags=19%, list=11%, signal=21%
GTF2E2_TARGET_GENES	GTF2E2_TARGET_GENES		368	0.244762	1.36172	0.0653465	0.101724	0.991	10371	tags=27%, list=19%, signal=33%
GATAAGR_GATA_C	GATAAGR_GATA_C		296	0.337901	1.36145	0.0561331	0.10167	0.991	9950	tags=34%, list=18%, signal=41%
TCCCRNNRTGC_UNKNOWN	TCCCRNNRTGC_UNKNOWN		213	0.283142	1.36126	0.111111	0.10158	0.991	7845	tags=24%, list=14%, signal=28%
PITX1_TARGET_GENES	PITX1_TARGET_GENES		338	0.284594	1.3602	0.127745	0.102007	0.992	8620	tags=28%, list=16%, signal=32%
STAT6_02	STAT6_02		257	0.342009	1.35984	0.126761	0.101979	0.992	10565	tags=37%, list=19%, signal=45%
ZNF529_TARGET_GENES	ZNF529_TARGET_GENES		45	0.369	1.3589	0.063786	0.102323	0.992	4149	tags=22%, list=8%, signal=24%
AP2_Q6_01	AP2_Q6_01		269	0.293503	1.35357	0.10262	0.105307	0.992	7623	tags=26%, list=14%, signal=30%
YTAATTAA_LHX3_01	YTAATTAA_LHX3_01		189	0.359117	1.35238	0.10352	0.105889	0.992	9540	tags=33%, list=17%, signal=40%
AP2_Q3	AP2_Q3		250	0.28396	1.35137	0.0826271	0.106363	0.992	10178	tags=29%, list=18%, signal=36%
SRF_Q6	SRF_Q6		242	0.374799	1.34883	0.160243	0.107804	0.992	7139	tags=30%, list=13%, signal=34%
TTF1_Q6	TTF1_Q6		263	0.293694	1.34796	0.0491453	0.108176	0.992	10274	tags=33%, list=19%, signal=40%
RACTNNRTTTNC_UNKNOWN	RACTNNRTTTNC_UNKNOWN		128	0.2845	1.3478	0.0921844	0.108056	0.992	10277	tags=33%, list=19%, signal=40%
HOXA10_TARGET_GENES	HOXA10_TARGET_GENES		253	0.289613	1.34672	0.129817	0.10847	0.992	10695	tags=34%, list=19%, signal=41%
RACCACAR_AML_Q6	RACCACAR_AML_Q6		259	0.351541	1.34671	0.110672	0.108278	0.992	9167	tags=32%, list=17%, signal=38%
VDR_Q3	VDR_Q3		227	0.302769	1.3467	0.0886076	0.108078	0.992	7056	tags=25%, list=13%, signal=29%
ZNF202_TARGET_GENES	ZNF202_TARGET_GENES		78	0.331962	1.34541	0.0674603	0.10868	0.992	7845	tags=29%, list=14%, signal=34%
TGACGTCA_ATF3_Q6	TGACGTCA_ATF3_Q6		229	0.292609	1.34519	0.0770878	0.108623	0.992	10308	tags=34%, list=19%, signal=41%
TAL1BETAITF2_01	TAL1BETAITF2_01		262	0.343423	1.3438	0.0966387	0.109295	0.993	7981	tags=29%, list=14%, signal=34%
TNCATNTCCYR_UNKNOWN	TNCATNTCCYR_UNKNOWN		135	0.300537	1.34139	0.126214	0.11071	0.993	7713	tags=28%, list=14%, signal=33%
HNF4_Q6	HNF4_Q6		264	0.297601	1.33685	0.0678295	0.113245	0.995	7541	tags=24%, list=14%, signal=28%
GATA1_04	GATA1_04		246	0.333562	1.33622	0.0876068	0.113455	0.995	8332	tags=30%, list=15%, signal=35%
RP58_01	RP58_01		208	0.381529	1.33621	0.164609	0.113256	0.995	8937	tags=35%, list=16%, signal=42%
ZNF354A_TARGET_GENES	ZNF354A_TARGET_GENES		28	0.415448	1.33576	0.0932203	0.11338	0.995	10735	tags=46%, list=19%, signal=58%
ZMYM2_TARGET_GENES	ZMYM2_TARGET_GENES		123	0.277175	1.33283	0.0956175	0.114982	0.995	8721	tags=29%, list=16%, signal=35%
NFY_01	NFY_01		253	0.261519	1.33239	0.0382166	0.115106	0.996	8589	tags=24%, list=16%, signal=28%
CHX10_01	CHX10_01		224	0.340758	1.33111	0.0833333	0.115859	0.996	9493	tags=31%, list=17%, signal=38%
EGR1_01	EGR1_01		265	0.266129	1.32849	0.075594	0.117279	0.996	7917	tags=25%, list=14%, signal=29%
ZNF488_TARGET_GENES	ZNF488_TARGET_GENES		41	0.37242	1.32846	0.0938166	0.117081	0.996	4500	tags=24%, list=8%, signal=27%
NKX62_Q2	NKX62_Q2		243	0.330861	1.32814	0.102296	0.117052	0.996	8605	tags=30%, list=16%, signal=35%
TAXCREB_02	TAXCREB_02		27	0.379665	1.32781	0.117172	0.11705	0.996	9669	tags=37%, list=18%, signal=45%
RORA1_01	RORA1_01		246	0.332526	1.32775	0.119588	0.116883	0.996	9841	tags=36%, list=18%, signal=44%
HMEF2_Q6	HMEF2_Q6		140	0.365963	1.32731	0.113924	0.117015	0.996	6499	tags=26%, list=12%, signal=30%
YY1_Q6	YY1_Q6		246	0.270788	1.32701	0.136735	0.11701	0.996	9982	tags=28%, list=18%, signal=35%
RSRFC4_01	RSRFC4_01		244	0.349429	1.32298	0.122056	0.119426	0.996	7281	tags=27%, list=13%, signal=31%
CREB_Q2	CREB_Q2		260	0.281843	1.32078	0.125541	0.120749	0.996	9720	tags=29%, list=18%, signal=35%
MYOD_Q6	MYOD_Q6		247	0.292233	1.31935	0.0534979	0.121485	0.996	4742	tags=20%, list=9%, signal=22%
CCANNAGRKGGC_UNKNOWN	CCANNAGRKGGC_UNKNOWN		118	0.301826	1.31659	0.0947581	0.123203	0.997	8675	tags=30%, list=16%, signal=35%
SRF_Q5_01	SRF_Q5_01		221	0.369004	1.31576	0.195021	0.123537	0.997	7139	tags=29%, list=13%, signal=34%
GGCKCATGS_UNKNOWN	GGCKCATGS_UNKNOWN		66	0.301253	1.31468	0.125786	0.124014	0.997	7055	tags=26%, list=13%, signal=29%
MAZR_01	MAZR_01		218	0.285897	1.31278	0.0956522	0.125106	0.997	8391	tags=28%, list=15%, signal=33%
CTCNANGTGNY_UNKNOWN	CTCNANGTGNY_UNKNOWN		90	0.321456	1.3118	0.105263	0.125534	0.997	9137	tags=31%, list=17%, signal=37%
NR1D1_TARGET_GENES	NR1D1_TARGET_GENES		114	0.287999	1.31146	0.142857	0.125582	0.997	7539	tags=26%, list=14%, signal=30%
MYCMAX_01	MYCMAX_01		254	0.261273	1.30981	0.0778689	0.126536	0.998	6818	tags=24%, list=12%, signal=28%
CAVIN1_TARGET_GENES	CAVIN1_TARGET_GENES		82	0.285128	1.30751	0.0571429	0.127837	0.998	7523	tags=27%, list=14%, signal=31%
COREBINDINGFACTOR_Q6	COREBINDINGFACTOR_Q6		270	0.336874	1.30605	0.149515	0.128566	0.998	7758	tags=26%, list=14%, signal=30%
YAATNRNNNYNATT_UNKNOWN	YAATNRNNNYNATT_UNKNOWN		104	0.354824	1.3056	0.127083	0.128611	0.998	6208	tags=25%, list=11%, signal=28%
CAGNYGKNAAA_UNKNOWN	CAGNYGKNAAA_UNKNOWN		78	0.39059	1.30534	0.195745	0.12857	0.998	9507	tags=36%, list=17%, signal=43%
CTGYNNCTYTAA_UNKNOWN	CTGYNNCTYTAA_UNKNOWN		85	0.337989	1.30497	0.114053	0.128576	0.998	9761	tags=32%, list=18%, signal=39%
FOXQ1_TARGET_GENES	FOXQ1_TARGET_GENES		38	0.329551	1.30443	0.176699	0.128767	0.998	5468	tags=26%, list=10%, signal=29%
STAT5B_01	STAT5B_01		251	0.331569	1.30426	0.146186	0.128637	0.998	6939	tags=26%, list=13%, signal=29%
COBLL1_TARGET_GENES	COBLL1_TARGET_GENES		142	0.278177	1.30308	0.0877944	0.129247	0.998	6036	tags=18%, list=11%, signal=21%
FOXD3_TARGET_GENES	FOXD3_TARGET_GENES		32	0.37885	1.30178	0.1875	0.129976	0.998	4037	tags=25%, list=7%, signal=27%
GATA1_01	GATA1_01		242	0.287408	1.30134	0.10166	0.13004	0.998	10512	tags=31%, list=19%, signal=38%
RNCTGNYNRNCTGNY_UNKNOWN	RNCTGNYNRNCTGNY_UNKNOWN		85	0.322603	1.30099	0.0831683	0.130097	0.998	8330	tags=34%, list=15%, signal=40%
SREBP_Q3	SREBP_Q3		257	0.281653	1.29648	0.0774059	0.132966	0.999	6642	tags=23%, list=12%, signal=26%
CP2_01	CP2_01		259	0.287325	1.29455	0.116998	0.134316	0.999	9564	tags=29%, list=17%, signal=35%
ATF_01	ATF_01		263	0.279953	1.29206	0.134066	0.135804	0.999	10308	tags=32%, list=19%, signal=40%
STAT5A_01	STAT5A_01		254	0.318827	1.29193	0.1625	0.135678	0.999	6939	tags=26%, list=13%, signal=29%
HSF_Q6	HSF_Q6		205	0.291454	1.29082	0.129979	0.136245	0.999	10268	tags=33%, list=19%, signal=40%
MEF2_02	MEF2_02		226	0.346468	1.28813	0.123173	0.137898	0.999	8295	tags=27%, list=15%, signal=32%
OCT_Q6	OCT_Q6		250	0.321603	1.28628	0.119835	0.1391	0.999	6795	tags=23%, list=12%, signal=26%
NFE2_01	NFE2_01		269	0.287999	1.28501	0.1258	0.139865	0.999	12113	tags=34%, list=22%, signal=43%
SRF_C	SRF_C		214	0.371687	1.2842	0.200409	0.140224	0.999	7715	tags=31%, list=14%, signal=36%
AHR_01	AHR_01		59	0.335495	1.28231	0.14862	0.141326	0.999	8957	tags=36%, list=16%, signal=42%
HNF4_01_B	HNF4_01_B		252	0.267643	1.28089	0.104418	0.142108	0.999	7744	tags=23%, list=14%, signal=27%
GATGKMRGCG_UNKNOWN	GATGKMRGCG_UNKNOWN		65	0.313287	1.28045	0.183838	0.142198	0.999	10877	tags=34%, list=20%, signal=42%
TGACCTTG_SF1_Q6	TGACCTTG_SF1_Q6		244	0.286593	1.27841	0.144068	0.143401	0.999	10941	tags=32%, list=20%, signal=39%
FXR_Q3	FXR_Q3		113	0.321958	1.27801	0.109959	0.143472	0.999	7651	tags=22%, list=14%, signal=26%
OCT1_B	OCT1_B		255	0.322654	1.27799	0.139344	0.143266	0.999	7302	tags=24%, list=13%, signal=27%
AP4_Q5	AP4_Q5		270	0.306299	1.27654	0.139785	0.144139	0.999	8233	tags=27%, list=15%, signal=31%
GTTNYYNNGGTNA_UNKNOWN	GTTNYYNNGGTNA_UNKNOWN		88	0.33016	1.27457	0.17562	0.145327	0.999	10951	tags=34%, list=20%, signal=42%
PU1_Q6	PU1_Q6		226	0.323964	1.27445	0.174442	0.145165	0.999	8657	tags=31%, list=16%, signal=36%
CACCCBINDINGFACTOR_Q6	CACCCBINDINGFACTOR_Q6		265	0.271142	1.27288	0.111111	0.146144	0.999	7415	tags=24%, list=13%, signal=28%
EGR_Q6	EGR_Q6		276	0.275666	1.2726	0.144374	0.146079	0.999	6918	tags=24%, list=13%, signal=28%
DR1_Q3	DR1_Q3		262	0.254219	1.2725	0.0635593	0.145928	0.999	4886	tags=16%, list=9%, signal=18%
ZFP3_TARGET_GENES	ZFP3_TARGET_GENES		342	0.248839	1.27227	0.0655738	0.145829	0.999	10036	tags=30%, list=18%, signal=37%
MYOD_01	MYOD_01		266	0.295886	1.27184	0.112288	0.145918	0.999	6793	tags=26%, list=12%, signal=29%
DICER1_TARGET_GENES	DICER1_TARGET_GENES		85	0.294276	1.27181	0.133733	0.145697	0.999	3278	tags=14%, list=6%, signal=15%
YGACNNYACAR_UNKNOWN	YGACNNYACAR_UNKNOWN		96	0.296775	1.27137	0.115942	0.145746	0.999	11374	tags=38%, list=21%, signal=47%
YGCGYRCGC_UNKNOWN	YGCGYRCGC_UNKNOWN		319	0.268883	1.26845	0.181818	0.147795	0.999	9802	tags=30%, list=18%, signal=36%
PAX5_02	PAX5_02		17	0.477256	1.26736	0.23029	0.148388	0.999	8912	tags=59%, list=16%, signal=70%
IRX3_TARGET_GENES	IRX3_TARGET_GENES		48	0.294644	1.26375	0.182	0.150875	0.999	11705	tags=38%, list=21%, signal=48%
GATA_Q6	GATA_Q6		196	0.319708	1.26207	0.141667	0.151862	0.999	7623	tags=28%, list=14%, signal=32%
MYOD_Q6_01	MYOD_Q6_01		254	0.284097	1.26131	0.131579	0.152186	0.999	9892	tags=31%, list=18%, signal=38%
ZF5_01	ZF5_01		236	0.266645	1.26024	0.160083	0.152768	0.999	11735	tags=34%, list=21%, signal=43%
TRIP13_TARGET_GENES	TRIP13_TARGET_GENES		93	0.367397	1.25772	0.17382	0.154536	1	9962	tags=34%, list=18%, signal=42%
ELK1_01	ELK1_01		272	0.245898	1.25739	0.155206	0.154603	1	8298	tags=24%, list=15%, signal=28%
TAL1BETAE47_01	TAL1BETAE47_01		249	0.324127	1.25645	0.172269	0.155113	1	8319	tags=28%, list=15%, signal=32%
TOX4_TARGET_GENES	TOX4_TARGET_GENES		207	0.270627	1.25512	0.182186	0.155856	1	5904	tags=21%, list=11%, signal=24%
CCAWWNAAGG_SRF_Q4	CCAWWNAAGG_SRF_Q4		84	0.398476	1.25132	0.223553	0.158612	1	5593	tags=29%, list=10%, signal=32%
ZNF791_TARGET_GENES	ZNF791_TARGET_GENES		63	0.304948	1.2511	0.0907336	0.158515	1	4345	tags=19%, list=8%, signal=21%
GATA2_01	GATA2_01		104	0.303949	1.25091	0.179167	0.158411	1	9180	tags=34%, list=17%, signal=40%
OCT1_02	OCT1_02		212	0.347342	1.24711	0.174098	0.161217	1	8298	tags=27%, list=15%, signal=32%
SREBP1_Q6	SREBP1_Q6		245	0.275397	1.2453	0.120172	0.162397	1	8949	tags=26%, list=16%, signal=31%
CREB_Q2_01	CREB_Q2_01		221	0.272771	1.24524	0.167024	0.162172	1	9604	tags=30%, list=17%, signal=36%
ZNF584_TARGET_GENES	ZNF584_TARGET_GENES		352	0.2312	1.24411	0.107438	0.162777	1	10996	tags=31%, list=20%, signal=39%
PAX3_01	PAX3_01		21	0.430785	1.24404	0.181818	0.162584	1	9493	tags=38%, list=17%, signal=46%
ARP1_01	ARP1_01		167	0.297415	1.24353	0.165631	0.162816	1	8564	tags=28%, list=16%, signal=33%
PPAR_DR1_Q2	PPAR_DR1_Q2		260	0.249798	1.24328	0.109533	0.162759	1	7873	tags=21%, list=14%, signal=24%
TGTYNNNNNRGCARM_UNKNOWN	TGTYNNNNNRGCARM_UNKNOWN		86	0.328839	1.24291	0.15272	0.162756	1	9696	tags=34%, list=18%, signal=41%
PRDM12_TARGET_GENES	PRDM12_TARGET_GENES		144	0.277168	1.24287	0.0766129	0.162532	1	4683	tags=17%, list=8%, signal=19%
ZNF530_TARGET_GENES	ZNF530_TARGET_GENES		29	0.352135	1.24191	0.15735	0.163069	1	5930	tags=28%, list=11%, signal=31%
EVI1_06	EVI1_06		23	0.447108	1.24138	0.221532	0.163283	1	7748	tags=39%, list=14%, signal=46%
SNACANNNYSYAGA_UNKNOWN	SNACANNNYSYAGA_UNKNOWN		92	0.284573	1.23992	0.182556	0.164074	1	9304	tags=27%, list=17%, signal=33%
GGCNRNWCTTYS_UNKNOWN	GGCNRNWCTTYS_UNKNOWN		85	0.262092	1.23854	0.1643	0.164909	1	9892	tags=27%, list=18%, signal=33%
RYTAAWNNNTGAY_UNKNOWN	RYTAAWNNNTGAY_UNKNOWN		61	0.341709	1.23834	0.157258	0.164809	1	3255	tags=18%, list=6%, signal=19%
CREBP1_Q2	CREBP1_Q2		253	0.283319	1.23458	0.203863	0.167492	1	9416	tags=29%, list=17%, signal=35%
E47_01	E47_01		254	0.289344	1.23266	0.163717	0.168806	1	10086	tags=31%, list=18%, signal=38%
STAT3_02	STAT3_02		144	0.280089	1.23185	0.127119	0.169179	1	7745	tags=25%, list=14%, signal=29%
RORA_TARGET_GENES	RORA_TARGET_GENES		255	0.271244	1.22841	0.228216	0.171689	1	7513	tags=23%, list=14%, signal=27%
YGTCCTTGR_UNKNOWN	YGTCCTTGR_UNKNOWN		92	0.318885	1.22771	0.212314	0.171969	1	11806	tags=36%, list=21%, signal=46%
SRF_Q4	SRF_Q4		225	0.337371	1.22691	0.23299	0.172344	1	8322	tags=30%, list=15%, signal=35%
YATGNWAAT_OCT_C	YATGNWAAT_OCT_C		355	0.30338	1.22644	0.155319	0.172504	1	7399	tags=25%, list=13%, signal=29%
GCCNNNWTAAR_UNKNOWN	GCCNNNWTAAR_UNKNOWN		149	0.302514	1.22644	0.185996	0.172234	1	12190	tags=38%, list=22%, signal=49%
STAT3_01	STAT3_01		22	0.389756	1.22271	0.213251	0.175124	1	12807	tags=55%, list=23%, signal=71%
AML_Q6	AML_Q6		264	0.319688	1.22169	0.196429	0.175733	1	11329	tags=33%, list=21%, signal=41%
RORA2_01	RORA2_01		155	0.306371	1.22166	0.193878	0.175481	1	5394	tags=23%, list=10%, signal=25%
WWTAAGGC_UNKNOWN	WWTAAGGC_UNKNOWN		143	0.311693	1.21931	0.198745	0.177286	1	12024	tags=37%, list=22%, signal=47%
POU6F1_01	POU6F1_01		237	0.32827	1.21686	0.205021	0.179078	1	9262	tags=29%, list=17%, signal=35%
SATB1_TARGET_GENES	SATB1_TARGET_GENES		171	0.263518	1.21532	0.170124	0.180031	1	10689	tags=33%, list=19%, signal=40%
ZNF777_TARGET_GENES	ZNF777_TARGET_GENES		61	0.318987	1.21336	0.196393	0.181391	1	4463	tags=21%, list=8%, signal=23%
PAX8_TARGET_GENES	PAX8_TARGET_GENES		85	0.267857	1.21296	0.157371	0.181447	1	9546	tags=29%, list=17%, signal=36%
NERF_Q2	NERF_Q2		254	0.286712	1.20967	0.219713	0.183926	1	7582	tags=25%, list=14%, signal=29%
ZNF677_TARGET_GENES	ZNF677_TARGET_GENES		172	0.27372	1.20821	0.160164	0.184972	1	7986	tags=27%, list=14%, signal=31%
ETS2_TARGET_GENES	ETS2_TARGET_GENES		386	0.222409	1.20745	0.186747	0.185268	1	7020	tags=19%, list=13%, signal=22%
HEN1_02	HEN1_02		198	0.278378	1.20707	0.179654	0.185338	1	7877	tags=25%, list=14%, signal=29%
E2A_Q2	E2A_Q2		245	0.274381	1.20326	0.178112	0.188407	1	10301	tags=30%, list=19%, signal=37%
TBPL1_TARGET_GENES	TBPL1_TARGET_GENES		198	0.23949	1.2027	0.0940695	0.188604	1	11798	tags=30%, list=21%, signal=38%
ZNF781_TARGET_GENES	ZNF781_TARGET_GENES		195	0.259598	1.20118	0.121331	0.189719	1	4898	tags=16%, list=9%, signal=17%
ZNF555_TARGET_GENES	ZNF555_TARGET_GENES		153	0.269959	1.19203	0.130693	0.197734	1	4683	tags=16%, list=8%, signal=17%
ACTWSNACTNY_UNKNOWN	ACTWSNACTNY_UNKNOWN		101	0.270909	1.1874	0.210736	0.201783	1	5509	tags=20%, list=10%, signal=22%
E47_02	E47_02		253	0.286064	1.18614	0.181818	0.20271	1	6527	tags=22%, list=12%, signal=25%
ZNF433_TARGET_GENES	ZNF433_TARGET_GENES		64	0.296794	1.18027	0.166341	0.208007	1	4683	tags=20%, list=8%, signal=22%
LBP1_Q6	LBP1_Q6		220	0.281842	1.17799	0.204211	0.209881	1	10401	tags=30%, list=19%, signal=37%
ZNF426_TARGET_GENES	ZNF426_TARGET_GENES		199	0.251103	1.1741	0.13852	0.213429	1	4898	tags=16%, list=9%, signal=17%
CTGRYYYNATT_UNKNOWN	CTGRYYYNATT_UNKNOWN		72	0.333348	1.16907	0.246862	0.217899	1	4471	tags=21%, list=8%, signal=23%
ATF3_Q6	ATF3_Q6		249	0.27058	1.16877	0.240781	0.217841	1	10458	tags=33%, list=19%, signal=40%
ETS_Q4	ETS_Q4		245	0.287398	1.16778	0.280392	0.218512	1	8626	tags=29%, list=16%, signal=34%
ARID3B_TARGET_GENES	ARID3B_TARGET_GENES		180	0.258643	1.16439	0.163636	0.221416	1	13373	tags=37%, list=24%, signal=49%
PTTG1_TARGET_GENES	PTTG1_TARGET_GENES		73	0.262796	1.16417	0.17284	0.221312	1	8890	tags=26%, list=16%, signal=31%
ZNF354B_TARGET_GENES	ZNF354B_TARGET_GENES		194	0.23445	1.15512	0.268817	0.230094	1	9912	tags=28%, list=18%, signal=34%
ZBTB5_TARGET_GENES	ZBTB5_TARGET_GENES		483	0.231175	1.15452	0.207547	0.2303	1	6545	tags=20%, list=12%, signal=23%
RGTTAMWNATT_HNF1_01	RGTTAMWNATT_HNF1_01		73	0.341273	1.15392	0.262846	0.230538	1	11070	tags=40%, list=20%, signal=50%
ALKBH3_TARGET_GENES	ALKBH3_TARGET_GENES		420	0.250283	1.15364	0.282209	0.230526	1	7043	tags=22%, list=13%, signal=25%
LMO2COM_01	LMO2COM_01		261	0.253056	1.15005	0.211268	0.234009	1	10141	tags=31%, list=18%, signal=38%
CREB3L2_TARGET_GENES	CREB3L2_TARGET_GENES		139	0.25151	1.14897	0.264	0.234795	1	9852	tags=27%, list=18%, signal=32%
AP4_01	AP4_01		262	0.260515	1.14873	0.205628	0.234724	1	8949	tags=27%, list=16%, signal=33%
RFX1_01	RFX1_01		256	0.284699	1.14746	0.270386	0.235707	1	9167	tags=26%, list=17%, signal=31%
YRTCANNRCGC_UNKNOWN	YRTCANNRCGC_UNKNOWN		64	0.315623	1.14633	0.303093	0.236522	1	9828	tags=38%, list=18%, signal=46%
ATOH1_TARGET_GENES	ATOH1_TARGET_GENES		215	0.237596	1.14614	0.284553	0.236351	1	9559	tags=26%, list=17%, signal=31%
TBP_01	TBP_01		241	0.276043	1.14558	0.225263	0.236643	1	7433	tags=24%, list=13%, signal=28%
TFCP2_TARGET_GENES	TFCP2_TARGET_GENES		76	0.267282	1.14495	0.286	0.236965	1	11788	tags=33%, list=21%, signal=42%
OCT_C	OCT_C		256	0.28725	1.14428	0.239316	0.23741	1	10186	tags=28%, list=18%, signal=34%
MYOGENIN_Q6	MYOGENIN_Q6		253	0.258205	1.14427	0.217573	0.237067	1	8567	tags=24%, list=16%, signal=28%
AP4_Q6	AP4_Q6		222	0.271767	1.13755	0.250526	0.244026	1	8522	tags=26%, list=15%, signal=31%
SMCHD1_TARGET_GENES	SMCHD1_TARGET_GENES		33	0.358725	1.13628	0.299163	0.245003	1	9688	tags=30%, list=18%, signal=37%
FXR_IR1_Q6	FXR_IR1_Q6		110	0.25642	1.13509	0.221983	0.245977	1	12321	tags=33%, list=22%, signal=42%
YBX1_TARGET_GENES	YBX1_TARGET_GENES		72	0.268187	1.13427	0.248963	0.24637	1	7836	tags=24%, list=14%, signal=27%
GTCNYYATGR_UNKNOWN	GTCNYYATGR_UNKNOWN		116	0.286086	1.13183	0.301255	0.248681	1	9693	tags=29%, list=18%, signal=35%
CATRRAGC_UNKNOWN	CATRRAGC_UNKNOWN		139	0.251445	1.13165	0.227743	0.248517	1	8186	tags=22%, list=15%, signal=26%
CGGAARNGGCNG_UNKNOWN	CGGAARNGGCNG_UNKNOWN		54	0.240284	1.12985	0.3083	0.250064	1	8158	tags=24%, list=15%, signal=28%
ZNF707_TARGET_GENES	ZNF707_TARGET_GENES		49	0.288993	1.12953	0.273504	0.250025	1	11274	tags=39%, list=20%, signal=49%
ZNF697_TARGET_GENES	ZNF697_TARGET_GENES		201	0.244816	1.12549	0.214286	0.254102	1	4898	tags=15%, list=9%, signal=16%
HEN1_01	HEN1_01		198	0.255323	1.12465	0.245243	0.254547	1	6481	tags=22%, list=12%, signal=25%
HOXB7_TARGET_GENES	HOXB7_TARGET_GENES		26	0.314259	1.12402	0.321637	0.254828	1	5810	tags=23%, list=11%, signal=26%
OCT1_Q5_01	OCT1_Q5_01		260	0.288957	1.12184	0.283613	0.257092	1	6795	tags=20%, list=12%, signal=23%
CCCNNGGGAR_OLF1_01	CCCNNGGGAR_OLF1_01		319	0.248417	1.11596	0.30303	0.2633	1	6422	tags=21%, list=12%, signal=24%
ATF_B	ATF_B		188	0.255889	1.11564	0.277657	0.263321	1	10308	tags=31%, list=19%, signal=38%
LMO2COM_02	LMO2COM_02		243	0.269142	1.11491	0.27409	0.263701	1	7839	tags=26%, list=14%, signal=30%
AP4_Q6_01	AP4_Q6_01		249	0.254008	1.11312	0.26501	0.265408	1	8141	tags=23%, list=15%, signal=27%
WYAAANNRNNNGCG_UNKNOWN	WYAAANNRNNNGCG_UNKNOWN		64	0.295924	1.10515	0.33543	0.274185	1	5135	tags=22%, list=9%, signal=24%
SF1_Q6	SF1_Q6		251	0.232327	1.10243	0.308017	0.277086	1	10911	tags=28%, list=20%, signal=35%
T3R_Q6	T3R_Q6		247	0.249959	1.09054	0.279176	0.290641	1	9186	tags=28%, list=17%, signal=34%
LAMB3_TARGET_GENES	LAMB3_TARGET_GENES		15	0.43249	1.08586	0.350515	0.295896	1	967	tags=13%, list=2%, signal=14%
RUVBL1_TARGET_GENES	RUVBL1_TARGET_GENES		168	0.225646	1.08567	0.342052	0.295644	1	12249	tags=31%, list=22%, signal=40%
GGARNTKYCCA_UNKNOWN	GGARNTKYCCA_UNKNOWN		80	0.292643	1.08502	0.323045	0.29603	1	5500	tags=21%, list=10%, signal=24%
PSMB5_TARGET_GENES	PSMB5_TARGET_GENES		272	0.24515	1.08242	0.378431	0.298736	1	12395	tags=32%, list=22%, signal=41%
NEUROG3_TARGET_GENES	NEUROG3_TARGET_GENES		22	0.333666	1.07964	0.351889	0.301745	1	12004	tags=36%, list=22%, signal=46%
ALX4_01	ALX4_01		15	0.415092	1.07161	0.365904	0.31129	1	4062	tags=27%, list=7%, signal=29%
KRCTCNNNNMANAGC_UNKNOWN	KRCTCNNNNMANAGC_UNKNOWN		15	0.365808	1.06739	0.359477	0.316299	1	1946	tags=20%, list=4%, signal=21%
ATF1_Q6	ATF1_Q6		235	0.253209	1.05598	0.368085	0.33075	1	13061	tags=38%, list=24%, signal=49%
NFE2L3_TARGET_GENES	NFE2L3_TARGET_GENES		16	0.368828	1.05559	0.375254	0.330748	1	9850	tags=44%, list=18%, signal=53%
ZNF510_TARGET_GENES	ZNF510_TARGET_GENES		40	0.286924	1.04634	0.367505	0.342622	1	7366	tags=25%, list=13%, signal=29%
SRSF9_TARGET_GENES	SRSF9_TARGET_GENES		36	0.308095	1.03937	0.388309	0.35149	1	4027	tags=17%, list=7%, signal=18%
ZNF704_TARGET_GENES	ZNF704_TARGET_GENES		68	0.24039	1.02857	0.415663	0.365997	1	9790	tags=29%, list=18%, signal=36%
ILK_TARGET_GENES	ILK_TARGET_GENES		23	0.298918	1.01833	0.405088	0.380271	1	7203	tags=26%, list=13%, signal=30%
GGGNRMNNYCAT_UNKNOWN	GGGNRMNNYCAT_UNKNOWN		83	0.238221	1.01624	0.430928	0.382765	1	11577	tags=35%, list=21%, signal=44%
ZNF292_TARGET_GENES	ZNF292_TARGET_GENES		23	0.303417	1.01225	0.425331	0.388031	1	4500	tags=22%, list=8%, signal=24%
NUFIP1_TARGET_GENES	NUFIP1_TARGET_GENES		45	0.257464	1.00866	0.438134	0.392912	1	10186	tags=29%, list=18%, signal=35%
ZNF214_TARGET_GENES	ZNF214_TARGET_GENES		21	0.329089	0.997648	0.449524	0.408673	1	15040	tags=57%, list=27%, signal=79%
PPARA_01	PPARA_01		36	0.274487	0.990344	0.469062	0.419012	1	2241	tags=11%, list=4%, signal=12%
MCRS1_TARGET_GENES	MCRS1_TARGET_GENES		38	0.272653	0.989333	0.484375	0.419916	1	7473	tags=21%, list=14%, signal=24%
EFC_Q6	EFC_Q6		271	0.226187	0.976039	0.458774	0.439953	1	12226	tags=31%, list=22%, signal=40%
MIF1_01	MIF1_01		185	0.240378	0.963852	0.497959	0.458912	1	10817	tags=29%, list=20%, signal=36%
TATA_01	TATA_01		246	0.234051	0.961081	0.504237	0.462722	1	7651	tags=20%, list=14%, signal=23%
YNTTTNNNANGCARM_UNKNOWN	YNTTTNNNANGCARM_UNKNOWN		71	0.282177	0.936616	0.548523	0.502943	1	5830	tags=18%, list=11%, signal=20%
CYTAGCAAY_UNKNOWN	CYTAGCAAY_UNKNOWN		146	0.246951	0.924721	0.571429	0.522889	1	10543	tags=28%, list=19%, signal=35%
SRF_01	SRF_01		51	0.325287	0.913223	0.563636	0.542168	1	5538	tags=24%, list=10%, signal=26%
SOX11_TARGET_GENES	SOX11_TARGET_GENES		44	0.204251	0.8148	0.692898	0.721508	1	6520	tags=18%, list=12%, signal=21%
PPARGC1A_TARGET_GENES	PPARGC1A_TARGET_GENES		98	0.198193	0.811061	0.702	0.727539	1	14860	tags=39%, list=27%, signal=53%
PER1_TARGET_GENES	PER1_TARGET_GENES		31	0.232348	0.769435	0.671875	0.800368	1	2946	tags=10%, list=5%, signal=10%

## Sheet: TCGA-EGFR-GSEA-C3 TFT-DOWN
NAME	GS<br> follow link to MSigDB	GS DETAILS	SIZE	ES	NES	NOM p-val	FDR q-val	FWER p-val	RANK AT MAX	LEADING EDGE
HJURP_TARGET_GENES	HJURP_TARGET_GENES	Details ...	59	-0.54681	-2.05562	0	0.00703443	0.026	14021	tags=44%, list=25%, signal=59%
SNRNP70_TARGET_GENES	SNRNP70_TARGET_GENES	Details ...	178	-0.406489	-1.88886	0	0.033243	0.145	9457	tags=31%, list=17%, signal=37%
ZNF785_TARGET_GENES	ZNF785_TARGET_GENES	Details ...	67	-0.477406	-1.81168	0	0.0551336	0.298	8643	tags=42%, list=16%, signal=49%
THRA_TARGET_GENES	THRA_TARGET_GENES	Details ...	43	-0.493969	-1.7553	0	0.0767331	0.429	4451	tags=30%, list=8%, signal=33%
ZNF774_TARGET_GENES	ZNF774_TARGET_GENES	Details ...	28	-0.560658	-1.73408	0.00402414	0.074843	0.485	7294	tags=43%, list=13%, signal=49%
ZNF16_TARGET_GENES	ZNF16_TARGET_GENES	Details ...	118	-0.456781	-1.6909	0.00570342	0.0974861	0.599	9776	tags=42%, list=18%, signal=50%
EPC1_TARGET_GENES	EPC1_TARGET_GENES	Details ...	366	-0.337457	-1.6316	0.0182556	0.147982	0.744	9955	tags=29%, list=18%, signal=35%
RUVBL2_TARGET_GENES	RUVBL2_TARGET_GENES	Details ...	35	-0.43101	-1.60698	0.0222222	0.162588	0.792	5973	tags=26%, list=11%, signal=29%
ZNF23_TARGET_GENES	ZNF23_TARGET_GENES	Details ...	16	-0.564001	-1.59367	0.0243902	0.159808	0.812	8050	tags=44%, list=15%, signal=51%
MYF6_TARGET_GENES	MYF6_TARGET_GENES	Details ...	16	-0.534012	-1.57622	0.0314961	0.166012	0.842	7296	tags=50%, list=13%, signal=58%
KLF14_TARGET_GENES	KLF14_TARGET_GENES	Details ...	245	-0.364372	-1.5684	0.0240481	0.160531	0.85	7938	tags=31%, list=14%, signal=36%
CDC5L_TARGET_GENES	CDC5L_TARGET_GENES	Details ...	314	-0.303267	-1.52053	0.0019685	0.215552	0.906	6739	tags=23%, list=12%, signal=26%
TFAM_TARGET_GENES	TFAM_TARGET_GENES	Details ...	56	-0.485833	-1.49756	0.0530612	0.236712	0.928	14096	tags=46%, list=26%, signal=62%
ZNF524_TARGET_GENES	ZNF524_TARGET_GENES	Details ...	343	-0.301355	-1.46503	0.0306122	0.27594	0.955	5016	tags=20%, list=9%, signal=22%
ZSCAN23_TARGET_GENES	ZSCAN23_TARGET_GENES	Details ...	84	-0.342809	-1.45745	0.0444874	0.272621	0.959	8643	tags=27%, list=16%, signal=32%
ZNF436_TARGET_GENES	ZNF436_TARGET_GENES	Details ...	490	-0.32016	-1.445	0.029703	0.27818	0.97	10770	tags=31%, list=20%, signal=38%
ASXL2_TARGET_GENES	ASXL2_TARGET_GENES	Details ...	52	-0.502145	-1.43572	0.132296	0.279187	0.977	9749	tags=48%, list=18%, signal=58%
GGAANCGGAANY_UNKNOWN	GGAANCGGAANY_UNKNOWN	Details ...	107	-0.277609	-1.42169	0.119588	0.28849	0.981	8334	tags=25%, list=15%, signal=30%
CTR9_TARGET_GENES	CTR9_TARGET_GENES	Details ...	64	-0.309768	-1.41423	0.044	0.286711	0.982	6544	tags=22%, list=12%, signal=25%
NPAT_TARGET_GENES	NPAT_TARGET_GENES	Details ...	231	-0.321015	-1.4094	0.116732	0.281141	0.984	10538	tags=29%, list=19%, signal=36%
ZSCAN5B_TARGET_GENES	ZSCAN5B_TARGET_GENES	Details ...	76	-0.353952	-1.40678	0.0738523	0.272022	0.984	10715	tags=29%, list=19%, signal=36%
ZNF454_TARGET_GENES	ZNF454_TARGET_GENES	Details ...	18	-0.509765	-1.40384	0.0965092	0.264521	0.985	10023	tags=50%, list=18%, signal=61%
MCM2_TARGET_GENES	MCM2_TARGET_GENES	Details ...	85	-0.356151	-1.40035	0.109344	0.258096	0.986	8844	tags=32%, list=16%, signal=38%
ZNF623_TARGET_GENES	ZNF623_TARGET_GENES	Details ...	448	-0.281771	-1.39609	0.0198413	0.253678	0.988	8899	tags=25%, list=16%, signal=29%
MIER1_TARGET_GENES	MIER1_TARGET_GENES	Details ...	367	-0.412189	-1.39156	0.152091	0.250237	0.989	10982	tags=41%, list=20%, signal=51%
PAF1_TARGET_GENES	PAF1_TARGET_GENES	Details ...	76	-0.375598	-1.38853	0.126984	0.245085	0.989	7071	tags=30%, list=13%, signal=35%
TERT_TARGET_GENES	TERT_TARGET_GENES	Details ...	117	-0.323455	-1.38246	0.0797665	0.244997	0.99	5746	tags=20%, list=10%, signal=22%
PTPRA_TARGET_GENES	PTPRA_TARGET_GENES	Details ...	127	-0.350033	-1.37516	0.129098	0.247653	0.992	12207	tags=35%, list=22%, signal=44%
H1_6_TARGET_GENES	H1_6_TARGET_GENES	Details ...	498	-0.268172	-1.37083	0.0426357	0.246003	0.993	7012	tags=21%, list=13%, signal=24%
PHB2_TARGET_GENES	PHB2_TARGET_GENES	Details ...	186	-0.286466	-1.36836	0.017341	0.241426	0.993	9573	tags=28%, list=17%, signal=34%
ZNF830_TARGET_GENES	ZNF830_TARGET_GENES	Details ...	273	-0.276192	-1.35831	0.106719	0.248084	0.994	6212	tags=19%, list=11%, signal=21%
FOXR2_TARGET_GENES	FOXR2_TARGET_GENES	Details ...	33	-0.367037	-1.35598	0.135294	0.243766	0.994	11468	tags=30%, list=21%, signal=38%
THRAP3_TARGET_GENES	THRAP3_TARGET_GENES	Details ...	25	-0.419285	-1.35539	0.137295	0.237311	0.994	11495	tags=48%, list=21%, signal=61%
HOXD11_TARGET_GENES	HOXD11_TARGET_GENES	Details ...	136	-0.279995	-1.3347	0.112	0.259827	0.996	5760	tags=18%, list=10%, signal=20%
STAT1_01	STAT1_01	Details ...	67	-0.282123	-1.31595	0.0750507	0.28138	0.996	2004	tags=15%, list=4%, signal=15%
ZFP82_TARGET_GENES	ZFP82_TARGET_GENES	Details ...	42	-0.377926	-1.3132	0.136	0.277687	0.996	7254	tags=31%, list=13%, signal=36%
NR1H4_TARGET_GENES	NR1H4_TARGET_GENES	Details ...	407	-0.2668	-1.30305	0.0532787	0.285102	0.996	8433	tags=24%, list=15%, signal=28%
SQSTM1_TARGET_GENES	SQSTM1_TARGET_GENES	Details ...	48	-0.365014	-1.30036	0.120792	0.281689	0.996	11390	tags=40%, list=21%, signal=50%
NR5A1_TARGET_GENES	NR5A1_TARGET_GENES	Details ...	18	-0.440714	-1.29718	0.125	0.279147	0.996	8101	tags=33%, list=15%, signal=39%
SNAI1_TARGET_GENES	SNAI1_TARGET_GENES	Details ...	229	-0.264222	-1.28782	0.162	0.286272	0.996	12707	tags=30%, list=23%, signal=39%
BRF2_TARGET_GENES	BRF2_TARGET_GENES	Details ...	19	-0.534525	-1.28776	0.15748	0.279368	0.996	4867	tags=32%, list=9%, signal=35%
PIAS4_TARGET_GENES	PIAS4_TARGET_GENES	Details ...	63	-0.330621	-1.28748	0.147002	0.273204	0.996	5888	tags=27%, list=11%, signal=30%
ZNF560_TARGET_GENES	ZNF560_TARGET_GENES	Details ...	48	-0.321509	-1.28351	0.0960334	0.272758	0.996	12741	tags=44%, list=23%, signal=57%
CASP8AP2_TARGET_GENES	CASP8AP2_TARGET_GENES	Details ...	310	-0.269862	-1.28257	0.161034	0.267921	0.996	10023	tags=26%, list=18%, signal=32%
YBX3_TARGET_GENES	YBX3_TARGET_GENES	Details ...	179	-0.304278	-1.27653	0.196819	0.270182	0.996	13854	tags=36%, list=25%, signal=48%
ZNF157_TARGET_GENES	ZNF157_TARGET_GENES	Details ...	76	-0.306499	-1.26346	0.124074	0.283048	0.999	7401	tags=28%, list=13%, signal=32%
ZFP36L1_TARGET_GENES	ZFP36L1_TARGET_GENES	Details ...	71	-0.307091	-1.25834	0.160853	0.284647	1	15007	tags=35%, list=27%, signal=48%
KAT2A_TARGET_GENES	KAT2A_TARGET_GENES	Details ...	113	-0.263165	-1.24053	0.176591	0.304806	1	10281	tags=25%, list=19%, signal=30%
HDAC8_TARGET_GENES	HDAC8_TARGET_GENES	Details ...	154	-0.263149	-1.24038	0.144869	0.298811	1	5862	tags=18%, list=11%, signal=20%
NRSF_01	NRSF_01	Details ...	94	-0.481104	-1.22875	0.303089	0.309582	1	11298	tags=51%, list=20%, signal=64%
PBXIP1_TARGET_GENES	PBXIP1_TARGET_GENES	Details ...	263	-0.253997	-1.22064	0.0903491	0.315424	1	12516	tags=30%, list=23%, signal=39%
ZNF595_TARGET_GENES	ZNF595_TARGET_GENES	Details ...	126	-0.268779	-1.21159	0.15942	0.322854	1	8078	tags=24%, list=15%, signal=28%
EGFR_TARGET_GENES	EGFR_TARGET_GENES	Details ...	30	-0.396722	-1.2071	0.280156	0.323391	1	3438	tags=20%, list=6%, signal=21%
HOXA13_TARGET_GENES	HOXA13_TARGET_GENES	Details ...	53	-0.308564	-1.2053	0.229814	0.320028	1	9457	tags=26%, list=17%, signal=32%
LFA1_Q6	LFA1_Q6	Details ...	248	-0.26965	-1.20357	0.172147	0.316747	1	6867	tags=21%, list=12%, signal=23%
ZNF582_TARGET_GENES	ZNF582_TARGET_GENES	Details ...	71	-0.292609	-1.2015	0.172277	0.314203	1	7291	tags=27%, list=13%, signal=31%
MCM3_TARGET_GENES	MCM3_TARGET_GENES	Details ...	221	-0.248588	-1.18952	0.219462	0.325961	1	8844	tags=26%, list=16%, signal=31%
ZNF548_TARGET_GENES	ZNF548_TARGET_GENES	Details ...	60	-0.314424	-1.18714	0.219417	0.324066	1	7426	tags=25%, list=13%, signal=29%
BRF1_TARGET_GENES	BRF1_TARGET_GENES	Details ...	58	-0.293027	-1.1855	0.211045	0.320984	1	3302	tags=14%, list=6%, signal=15%
SKP2_TARGET_GENES	SKP2_TARGET_GENES	Details ...	68	-0.305106	-1.18549	0.183267	0.315644	1	9044	tags=28%, list=16%, signal=33%
HEY2_TARGET_GENES	HEY2_TARGET_GENES	Details ...	74	-0.305167	-1.17765	0.229703	0.321707	1	11468	tags=31%, list=21%, signal=39%
MSX2_TARGET_GENES	MSX2_TARGET_GENES	Details ...	18	-0.379332	-1.17292	0.276265	0.323546	1	9870	tags=33%, list=18%, signal=41%
PPARG_01	PPARG_01	Details ...	47	-0.281676	-1.16163	0.243714	0.335175	1	9212	tags=30%, list=17%, signal=36%
DROSHA_TARGET_GENES	DROSHA_TARGET_GENES	Details ...	67	-0.27498	-1.15448	0.244048	0.340514	1	7663	tags=22%, list=14%, signal=26%
RAX2_TARGET_GENES	RAX2_TARGET_GENES	Details ...	70	-0.290821	-1.15259	0.289738	0.338045	1	4870	tags=20%, list=9%, signal=22%
ZNF669_TARGET_GENES	ZNF669_TARGET_GENES	Details ...	124	-0.240407	-1.14931	0.221992	0.337913	1	8772	tags=20%, list=16%, signal=24%
HNF4_DR1_Q3	HNF4_DR1_Q3	Details ...	264	-0.231291	-1.14406	0.205374	0.340398	1	9689	tags=25%, list=18%, signal=30%
ZNF667_TARGET_GENES	ZNF667_TARGET_GENES	Details ...	140	-0.279632	-1.13742	0.294695	0.345211	1	7610	tags=24%, list=14%, signal=27%
CAGNWMCNNNGAC_UNKNOWN	CAGNWMCNNNGAC_UNKNOWN	Details ...	84	-0.388082	-1.11915	0.366603	0.367731	1	11298	tags=45%, list=20%, signal=57%
WDHD1_TARGET_GENES	WDHD1_TARGET_GENES	Details ...	194	-0.246009	-1.11526	0.292	0.368534	1	10082	tags=27%, list=18%, signal=33%
OLF1_01	OLF1_01	Details ...	269	-0.248813	-1.10089	0.28932	0.386121	1	9695	tags=28%, list=18%, signal=34%
COUP_DR1_Q6	COUP_DR1_Q6	Details ...	252	-0.212946	-1.09351	0.284091	0.392917	1	9212	tags=21%, list=17%, signal=26%
SNAPC4_TARGET_GENES	SNAPC4_TARGET_GENES	Details ...	124	-0.269802	-1.09117	0.306584	0.391236	1	13142	tags=33%, list=24%, signal=43%
NKX6_1_TARGET_GENES	NKX6_1_TARGET_GENES	Details ...	33	-0.313407	-1.0869	0.323887	0.392603	1	16522	tags=48%, list=30%, signal=69%
ZMYND11_TARGET_GENES	ZMYND11_TARGET_GENES	Details ...	49	-0.265524	-1.06905	0.37182	0.415766	1	11468	tags=29%, list=21%, signal=36%
E12_Q6	E12_Q6	Details ...	264	-0.247639	-1.04692	0.360624	0.446914	1	9096	tags=24%, list=16%, signal=29%
WCTCNATGGY_UNKNOWN	WCTCNATGGY_UNKNOWN	Details ...	83	-0.241411	-1.04502	0.398844	0.444408	1	13608	tags=35%, list=25%, signal=46%
ZNF502_TARGET_GENES	ZNF502_TARGET_GENES	Details ...	33	-0.308967	-1.03519	0.404339	0.454731	1	11278	tags=42%, list=20%, signal=53%
RYTGCNWTGGNR_UNKNOWN	RYTGCNWTGGNR_UNKNOWN	Details ...	118	-0.297628	-1.03501	0.421252	0.449243	1	13254	tags=37%, list=24%, signal=49%
GTF3A_TARGET_GENES	GTF3A_TARGET_GENES	Details ...	82	-0.26883	-1.03253	0.404382	0.447809	1	10381	tags=18%, list=19%, signal=22%
HMCES_TARGET_GENES	HMCES_TARGET_GENES	Details ...	22	-0.326152	-1.01927	0.436105	0.464488	1	3486	tags=14%, list=6%, signal=15%
HEB_Q6	HEB_Q6	Details ...	261	-0.24385	-1.01799	0.415238	0.460856	1	8289	tags=23%, list=15%, signal=27%
MAML1_TARGET_GENES	MAML1_TARGET_GENES	Details ...	295	-0.304726	-1.01529	0.437238	0.4598	1	6747	tags=23%, list=12%, signal=26%
HMX1_01	HMX1_01	Details ...	43	-0.291035	-1.01504	0.431907	0.454787	1	8571	tags=28%, list=16%, signal=33%
PPARA_02	PPARA_02	Details ...	128	-0.2385	-1.01192	0.4294	0.4546	1	10700	tags=27%, list=19%, signal=34%
ZNF169_TARGET_GENES	ZNF169_TARGET_GENES	Details ...	46	-0.272016	-1.0099	0.44186	0.452686	1	11536	tags=35%, list=21%, signal=44%
ZNF239_TARGET_GENES	ZNF239_TARGET_GENES	Details ...	37	-0.284288	-1.0004	0.44381	0.463048	1	6731	tags=24%, list=12%, signal=28%
BAHD1_TARGET_GENES	BAHD1_TARGET_GENES	Details ...	36	-0.31215	-0.993821	0.475379	0.468595	1	10385	tags=33%, list=19%, signal=41%
RYCACNNRNNRNCAG_UNKNOWN	RYCACNNRNNRNCAG_UNKNOWN	Details ...	74	-0.245654	-0.98812	0.448405	0.472791	1	4990	tags=18%, list=9%, signal=19%
ZNF404_TARGET_GENES	ZNF404_TARGET_GENES	Details ...	20	-0.308639	-0.984977	0.473267	0.472817	1	18558	tags=55%, list=34%, signal=83%
PGBD5_TARGET_GENES	PGBD5_TARGET_GENES	Details ...	17	-0.307494	-0.977128	0.490234	0.480405	1	2531	tags=18%, list=5%, signal=18%
SVIL_TARGET_GENES	SVIL_TARGET_GENES	Details ...	21	-0.321523	-0.967034	0.483871	0.49233	1	10417	tags=29%, list=19%, signal=35%
DPPA3_TARGET_GENES	DPPA3_TARGET_GENES	Details ...	25	-0.290408	-0.946638	0.533333	0.52249	1	9776	tags=28%, list=18%, signal=34%
NME2_TARGET_GENES	NME2_TARGET_GENES	Details ...	69	-0.266087	-0.928838	0.568862	0.548285	1	10339	tags=33%, list=19%, signal=41%
MAPK3_TARGET_GENES	MAPK3_TARGET_GENES	Details ...	94	-0.247601	-0.912486	0.540816	0.571463	1	12941	tags=28%, list=23%, signal=36%
RYTGCNNRGNAAC_MIF1_01	RYTGCNNRGNAAC_MIF1_01	Details ...	89	-0.265094	-0.902491	0.572519	0.583457	1	9685	tags=26%, list=18%, signal=31%
GTTGNYNNRGNAAC_UNKNOWN	GTTGNYNNRGNAAC_UNKNOWN	Details ...	108	-0.256138	-0.888837	0.578035	0.602509	1	9096	tags=27%, list=16%, signal=32%
RFX1_02	RFX1_02	Details ...	282	-0.233884	-0.879917	0.619318	0.612538	1	8195	tags=22%, list=15%, signal=26%
AHRARNT_02	AHRARNT_02	Details ...	15	-0.305808	-0.854473	0.645094	0.65294	1	14014	tags=40%, list=25%, signal=54%
GTTRYCATRR_UNKNOWN	GTTRYCATRR_UNKNOWN	Details ...	174	-0.227533	-0.789134	0.724609	0.764821	1	15390	tags=36%, list=28%, signal=50%
MEF2_04	MEF2_04		25	-0.252925	-0.748169	0.817343	0.825451	1	14365	tags=44%, list=26%, signal=59%

## Sheet: TCGA-EGFR-COX model
unilateral	id	HR	HR.95L	HR.95H	pvalue
	age	1.02794	1.00514	1.05125	0.0160437
	gender	0.78136	0.508894	1.1997	0.259438
	grade	1.33125	0.981451	1.80573	0.0658289
	stage	1.29386	0.86209	1.94188	0.213634
	T	1.62405	0.976667	2.70056	0.061627
	N	2.25796	1.30802	3.89779	0.0034563
	EGFR	1.41124	1.06388	1.87201	0.0168698
multifactorial	id	HR	HR.95L	HR.95H	pvalue
	age	1.03011	1.00706	1.05369	0.0101925
	gender	0.843116	0.544397	1.30575	0.444491
	grade	1.1404	0.842502	1.54362	0.395052
	stage	0.975553	0.494611	1.92414	0.943063
	T	1.24405	0.632953	2.44512	0.526484
	N	1.8308	1.04478	3.20819	0.0345993
	EGFR	1.46396	1.03278	2.07516	0.0322598

## Sheet: TCGA-EGFR-Clinical feature
Age											Gender											Grade											Stage											（T）Tumor size

## Sheet: TCGA-GSEA-GO-UPR
	NAME	GS<br> follow link to MSigDB	GS DETAILS	SIZE	ES	NES	NOM p-val	FDR q-val	FWER p-val	RANK AT MAX	LEADING EDGE
EGFR	GO_PERK_MEDIATED_UNFOLDED_PROTEIN_RESPON	GO_PERK_MEDIATED_UNFOLDED_PROTEIN_RESPON	Details ...	21	0.486361	1.41832	0.128906	0.128906	0.066	10663	tags=48%, list=19%, signal=59%
	GO_IRE1_MEDIATED_UNFOLDED_PROTEIN_RESPON	GO_IRE1_MEDIATED_UNFOLDED_PROTEIN_RESPON	Details ...	64	0.239331	1.06399	0.394892	0.394892	0.201	10663	tags=30%, list=19%, signal=37%
KRAS	GO_PERK_MEDIATED_UNFOLDED_PROTEIN_RESPON	GO_PERK_MEDIATED_UNFOLDED_PROTEIN_RESPON	Details ...	21	0.608465	1.77486	0.0218254	0.0218254	0.011	9751	tags=57%, list=18%, signal=69%
	GO_IRE1_MEDIATED_UNFOLDED_PROTEIN_RESPON	GO_IRE1_MEDIATED_UNFOLDED_PROTEIN_RESPON	Details ...	64	0.276452	1.24051	0.246154	0.246154	0.128	13578	tags=38%, list=25%, signal=50%
MAP2K1(MEK1)	GO_PERK_MEDIATED_UNFOLDED_PROTEIN_RESPONSE	GO_PERK_MEDIATED_UNFOLDED_PROTEIN_RESPONSE	Details ...	21	0.395974	1.17016	0.304094	0.304094	0.156	10173	tags=38%, list=18%, signal=47%
	GO_IRE1_MEDIATED_UNFOLDED_PROTEIN_RESPONSE	GO_IRE1_MEDIATED_UNFOLDED_PROTEIN_RESPONSE	Details ...	66	0.314327	1.45867	0.0780591	0.0780591	0.037	8425	tags=27%, list=15%, signal=32%
MAPK1(ERK2)	GO_PERK_MEDIATED_UNFOLDED_PROTEIN_RESPONSE	GO_PERK_MEDIATED_UNFOLDED_PROTEIN_RESPONSE	Details ...	21	0.542251	1.60819	0.0433071	0.0433071	0.022	8948	tags=52%, list=16%, signal=62%
	GO_IRE1_MEDIATED_UNFOLDED_PROTEIN_RESPONSE	GO_IRE1_MEDIATED_UNFOLDED_PROTEIN_RESPONSE	Details ...	66	0.400084	1.86435	0.0101626	0.0101626	0.005	8189	tags=35%, list=15%, signal=41%

## Sheet: TCGA-GSEA-REACTOME-HSF1 UPR
	NAME	GS<br> follow link to MSigDB	GS DETAILS	SIZE	ES	NES	NOM p-val	FDR q-val	FWER p-val	RANK AT MAX	LEADING EDGE
PERK	REACTOME_REGULATION_OF_HSF1_MEDIATED_HEAT_SHOCK_RESPONSE	REACTOME_REGULATION_OF_HSF1_MEDIATED_HEAT_SHOCK_RESPONSE	Details ...	81	0.447428	1.72466	0.0290456	0.0290456	0.014	11222	tags=41%, list=20%, signal=51%
IRE1α	REACTOME_REGULATION_OF_HSF1_MEDIATED_HEAT_SHOCK_RESPONSE	REACTOME_REGULATION_OF_HSF1_MEDIATED_HEAT_SHOCK_RESPONSE	Details ...	81	0.28672	1.12637	0.326572	0.326572	0.161	12146	tags=30%, list=22%, signal=38%
